# Supplementary material for: Development of D-box peptides to inhibit the anaphase-promoting complex/cyclosome
Source: eLife journal article supplement (doi:10.7554/elife.104238), 2025-01-28
Supplement: fig6-figsupp1-data4 [file elife-104238-fig6-figsupp1-data4-v1.zip]

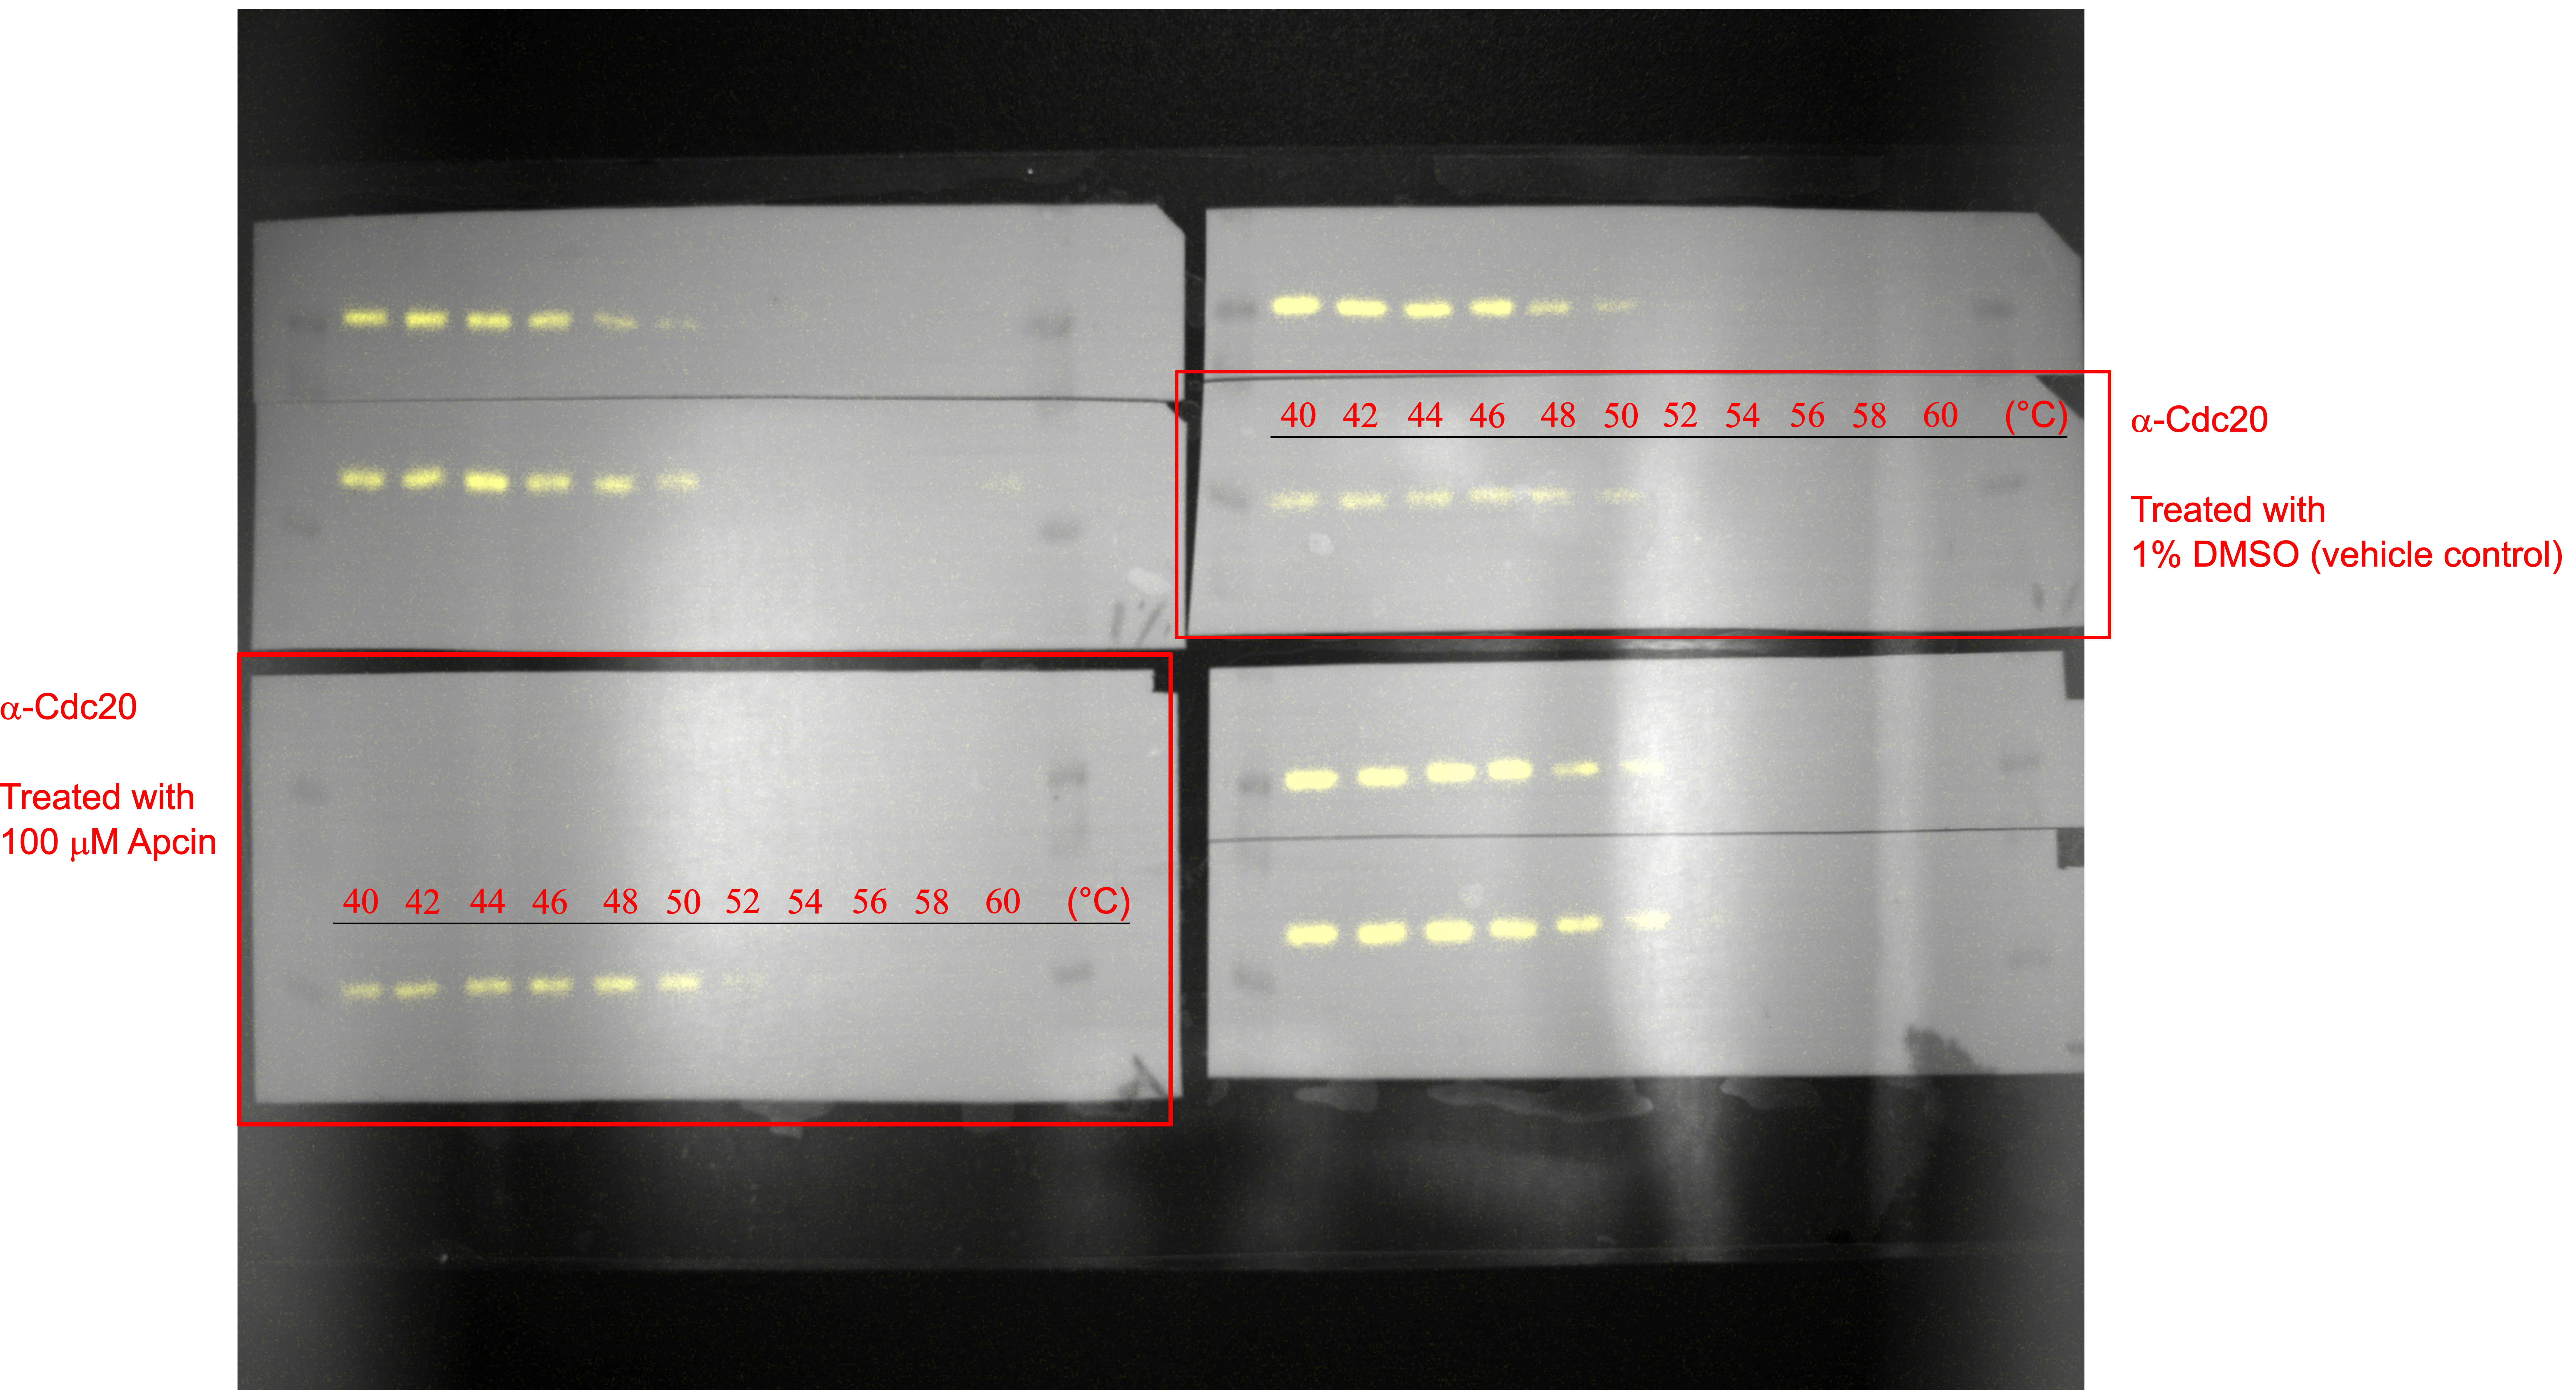

Figure 6-figure supplement 5, Source data 4. Red box highlights data that are used and plotted in Figure 6-figure supplement 5. Source data 4 relates to one experimental replicate (collected on 20180826) performing a CETSA experiment detecting endogenous Cdc20 in a HEK293T cell lysate. Temperatures indicated correspond to that of which the lysate aliquot was heated during the CETSA experiment, prior to western blot detection.
