# Supplementary material for: Development of D-box peptides to inhibit the anaphase-promoting complex/cyclosome
Source: eLife. 2025 Sep 1;14:RP104238. doi: 10.7554/eLife.104238 (PMC12401543; doi:10.7554/eLife.104238)
Supplement: Figure 2—source data 1. [file elife-104238-fig2-data1.xlsx]

## Sheet: Figure 2A - Cdc20-Apcin melts
Temperature (°C)	1% DMSO	Apcin 100 μM	Apcin 50 μM	Apcin 25 μM		Note: Data in blue and with an Asterix is excluded for data fitting (pre and post melt transition).
24.96	0.470308*	0.712893*	0.749821*	0.722757*
25.03	0.448491*	0.699118*	0.745647*	0.711953*
25.09	0.460039*	0.696227*	0.757125*	0.708317*
25.16	0.460381*	0.69564*	0.742385*	0.714615*
25.16	0.454028*	0.701758*	0.744624*	0.713822*
25.22	0.447941*	0.696909*	0.754293*	0.712243*
25.29	0.444535*	0.706845*	0.7283*	0.718397*
25.29	0.429627*	0.687945*	0.738712*	0.703666*
25.36	0.424091*	0.672018*	0.723568*	0.702935*
25.36	0.448793*	0.682606*	0.730074*	0.699661*
25.49	0.444937*	0.678813*	0.735342*	0.705142*
25.55	0.444959*	0.671599*	0.732034*	0.691063*
25.56	0.448357*	0.680076*	0.734783*	0.696124*
25.61	0.442391*	0.685845*	0.719029*	0.690403*
25.68	0.43814*	0.676545*	0.717269*	0.694727*
25.68	0.433477*	0.678226*	0.71885*	0.70333*
25.75	0.433471*	0.670774*	0.722403*	0.701896*
25.81	0.427511*	0.669094*	0.717271*	0.693289*
25.87	0.41816*	0.647776*	0.709407*	0.694038*
25.87	0.433897*	0.650471*	0.701354*	0.691861*
25.95	0.421976*	0.660163*	0.701731*	0.686179*
26.01	0.430925*	0.655233*	0.702344*	0.685401*
26.01	0.418586*	0.655187*	0.698787*	0.689454*
26.07	0.427943*	0.650445*	0.690738*	0.685842*
26.13	0.428375*	0.64714*	0.689373*	0.687634*
26.19	0.420724*	0.642166*	0.679349*	0.692339*
26.2	0.42242*	0.645466*	0.68602*	0.689107*
26.27	0.413497*	0.641335*	0.69625*	0.690203*
26.33	0.41988*	0.639486*	0.682112*	0.685892*
26.33	0.430915*	0.637582*	0.673277*	0.689937*
26.39	0.421572*	0.625614*	0.672506*	0.670568*
26.46	0.420304*	0.632015*	0.660919*	0.682755*
26.52	0.411813*	0.624586*	0.669756*	0.669831*
26.52	0.425819*	0.630974*	0.651141*	0.663094*
26.65	0.411393*	0.618597*	0.66408*	0.676669*
26.65	0.427525*	0.621497*	0.654467*	0.683165*
26.71	0.407164*	0.609314*	0.648193*	0.669495*
26.77	0.414797*	0.602919*	0.650944*	0.670236*
26.77	0.429655*	0.615928*	0.656242*	0.67167*
26.91	0.419893*	0.601887*	0.646429*	0.672374*
26.91	0.414389*	0.608078*	0.645268*	0.678509*
26.96	0.413112*	0.610773*	0.646049*	0.664842*
27.02	0.425848*	0.610774*	0.64251*	0.673462*
27.02	0.415239*	0.59776*	0.64075*	0.673464*
27.15	0.406333*	0.601079*	0.643902*	0.667374*
27.15	0.415241*	0.599627*	0.633698*	0.667724*
27.22	0.421191*	0.595497*	0.633297*	0.664499*
27.22	0.420335*	0.587248*	0.632537*	0.659504*
27.34	0.416523*	0.595092*	0.625861*	0.662727*
27.34	0.417803*	0.603567*	0.623331*	0.660605*
27.39	0.416945*	0.593451*	0.619024*	0.664213*
27.45	0.419501*	0.590142*	0.615882*	0.660253*
27.52	0.415256*	0.575288*	0.619421*	0.657388*
27.52	0.407621*	0.583555*	0.616664*	0.660953*
27.59	0.408473*	0.580455*	0.619038*	0.658477*
27.65	0.390657*	0.577982*	0.595477*	0.652337*
27.71	0.408473*	0.578603*	0.608454*	0.651304*
27.77	0.412728*	0.576745*	0.608459*	0.662797*
27.77	0.41654*	0.574479*	0.608074*	0.656706*
27.83	0.400842*	0.570139*	0.602166*	0.644819*
27.89	0.414004*	0.559216*	0.607693*	0.653491*
27.95	0.421641*	0.569734*	0.591197*	0.655966*
27.95	0.412316*	0.568919*	0.595734*	0.655276*
28.01	0.41613*	0.564614*	0.595199*	0.653209*
28.07	0.405529*	0.561085*	0.595347*	0.652061*
28.13	0.410195*	0.561494*	0.586908*	0.655279*
28.14	0.415716*	0.553257*	0.586146*	0.647415*
28.2	0.41783*	0.553261*	0.580859*	0.643108*
28.31	0.409779*	0.555521*	0.58125*	0.649198*
28.31	0.41487*	0.545194*	0.5873*	0.651324*
28.37	0.405957*	0.544797*	0.583394*	0.646671*
28.37	0.411483*	0.544157*	0.582772*	0.646272*
28.49	0.397063*	0.548285*	0.584933*	0.650933*
28.5	0.418692*	0.554081*	0.572801*	0.649549*
28.55	0.412755*	0.547061*	0.571418*	0.63841*
28.61	0.402998*	0.540455*	0.566902*	0.631917*
28.67	0.416588*	0.53181*	0.556931*	0.639508*
28.72	0.4064*	0.539638*	0.559083*	0.644156*
28.72	0.391976*	0.556765*	0.554166*	0.638758*
28.85	0.405134*	0.532856*	0.5597*	0.643122*
28.85	0.408953*	0.530591*	0.562864*	0.634175*
28.91	0.417868*	0.531004*	0.563244*	0.635952*
28.97	0.402179*	0.533909*	0.557195*	0.630962*
29.02	0.406838*	0.530595*	0.557568*	0.63992*
29.02	0.403874*	0.542957*	0.54989*	0.629464*
29.09	0.400911*	0.534549*	0.543709*	0.629936*
29.15	0.407686*	0.527704*	0.542447*	0.636299*
29.2	0.417874*	0.531013*	0.547369*	0.640267*
29.26	0.410243*	0.524394*	0.549892*	0.626593*
29.31	0.415331*	0.521322*	0.539937*	0.634182*
29.37	0.402611*	0.513895*	0.545237*	0.627007*
29.38	0.399221*	0.52586*	0.545993*	0.629134*
29.44	0.405158*	0.531015*	0.529727*	0.634529*
29.55	0.412791*	0.51907*	0.536036*	0.626667*
29.55	0.411949*	0.520113*	0.533514*	0.630287*
29.6	0.413217*	0.514065*	0.545356*	0.628721*
29.66	0.404744*	0.52522*	0.533011*	0.622986*
29.66	0.417034*	0.509793*	0.528987*	0.626673*
29.72	0.396266*	0.513915*	0.531123*	0.619835*
29.78	0.403475*	0.505433*	0.530116*	0.61478*
29.84	0.405596*	0.507298*	0.530119*	0.617653*
29.89	0.41026*	0.511409*	0.530492*	0.629477*
29.95	0.397546*	0.516823*	0.525081*	0.617725*
29.95	0.397544*	0.516813*	0.516251*	0.616283*
30.06	0.420448*	0.512865*	0.517759*	0.616215*
30.06	0.413237*	0.51763*	0.515244*	0.602612*
30.12	0.410698*	0.513514*	0.513112*	0.603714*
30.18	0.409002*	0.504638*	0.517014*	0.599755*
30.24	0.409848*	0.511013*	0.516*	0.600427*
30.3	0.403917*	0.513116*	0.510973*	0.601945*
30.3	0.409858*	0.501736*	0.516004*	0.594687*
30.36	0.41113*	0.50093*	0.517013*	0.58396*
30.41	0.41241*	0.50383*	0.514497*	0.590465*
30.47	0.405197*	0.506904*	0.510335*	0.587169*
30.52	0.397134*	0.505453*	0.507179*	0.588947*
30.57	0.398832*	0.5069*	0.510336*	0.591479*
30.63	0.390357*	0.501335*	0.501505*	0.588609*
30.69	0.3946*	0.501342*	0.512103*	0.584303*
30.69	0.392483*	0.499481*	0.510335*	0.584302*
30.8	0.393335*	0.503843*	0.489801*	0.576112*
30.8	0.37932*	0.493662*	0.490656*	0.578485*
30.86	0.380602*	0.489144*	0.502262*	0.567755*
30.92	0.385266*	0.49512*	0.499108*	0.570966*
30.96	0.380189*	0.494318*	0.507181*	0.567418*
31.02	0.389515*	0.491407*	0.495573*	0.563787*
31.02	0.383576*	0.493665*	0.492414*	0.564125*
31.13	0.387391*	0.493262*	0.492036*	0.565216*
31.19	0.3857*	0.493664*	0.497714*	0.556943*
31.19	0.371692*	0.492612*	0.496689*	0.557612*
31.24	0.387402*	0.482116*	0.486747*	0.558044*
31.24	0.378923*	0.49141*	0.49381*	0.550865*
31.36	0.374679*	0.478407*	0.48674*	0.5523*
31.4	0.371276*	0.490355*	0.483957*	0.548663*
31.46	0.367458*	0.483329*	0.480797*	0.544693*
31.52	0.361097*	0.49076*	0.486098*	0.540378*
31.52	0.364499*	0.478813*	0.47828*	0.541144*
31.62	0.355148*	0.474442*	0.482931*	0.546462*
31.68	0.360235*	0.490113*	0.476608*	0.537075*
31.68	0.358112*	0.478963*	0.481915*	0.535636*
31.69	0.358536*	0.486804*	0.48758*	0.530228*
31.79	0.353454*	0.484142*	0.478007*	0.530994*
31.84	0.33602*	0.48017*	0.474193*	0.530898*
31.89	0.341558*	0.486808*	0.466387*	0.523048*
31.95	0.349633*	0.473403*	0.47838*	0.525582*
32.01	0.336479*	0.474854*	0.472707*	0.52669*
32.06	0.334821*	0.482549*	0.472995*	0.526794*
32.06	0.335659*	0.483353*	0.493159*	0.514539*
32.12	0.32888*	0.477373*	0.471602*	0.512772*
32.12	0.336083*	0.470745*	0.46706*	0.506256*
32.22	0.342024*	0.481503*	0.473738*	0.513101*
32.27	0.329706*	0.476325*	0.467058*	0.513438*
32.32	0.319521*	0.465579*	0.469199*	0.503718*
32.38	0.328018*	0.474869*	0.47096*	0.500841*
32.43	0.320398*	0.479242*	0.464557*	0.505599*
32.49	0.330144*	0.469296*	0.470969*	0.506593*
32.49	0.31317*	0.476741*	0.462145*	0.502286*
32.59	0.320367*	0.471969*	0.457591*	0.497203*
32.65	0.303383*	0.483126*	0.466418*	0.495767*
32.65	0.306347*	0.472776*	0.460099*	0.499304*
32.75	0.309759*	0.471969*	0.454071*	0.481401*
32.75	0.306343*	0.474643*	0.468942*	0.490681*
32.8	0.307639*	0.48127*	0.473495*	0.492895*
32.85	0.295728*	0.470926*	0.468948*	0.486373*
32.91	0.308884*	0.469464*	0.460477*	0.479512*
32.96	0.297032*	0.468274*	0.464671*	0.478536*
32.96	0.307239*	0.471593*	0.473141*	0.478208*
33.07	0.297866*	0.483948*	0.460123*	0.479199*
33.12	0.290675*	0.470137*	0.45762*	0.467051*
33.17	0.288963*	0.481695*	0.456224*	0.470252*
33.22	0.287254*	0.474658*	0.463658*	0.473452*
33.27	0.280479*	0.477978*	0.456228*	0.455883*
33.27	0.292805*	0.464573*	0.454092*	0.461306*
33.32	0.28555*	0.469499*	0.442844*	0.465164*
33.43	0.287264*	0.478386*	0.460145*	0.464834*
33.48	0.28343*	0.476933*	0.460523*	0.45223*
33.48	0.281726*	0.46061*	0.448521*	0.451119*
33.53	0.271929*	0.466991*	0.458101*	0.466154*
33.58	0.261316*	0.461407*	0.458112*	0.454657*
33.63	0.265972*	0.463675*	0.449647*	0.449232*
33.69	0.265568*	0.465135*	0.45281*	0.448902*
33.74	0.263856*	0.46368*	0.446116*	0.45499*
33.74	0.257079*	0.459567*	0.445759*	0.447478*
33.84	0.260911*	0.461028*	0.455982*	0.445714*
33.89	0.251519*	0.465954*	0.44649*	0.439499*
34	0.26256*	0.462638*	0.445096*	0.444144*
34	0.256671*	0.4629*	0.445398*	0.432781*
34.04	0.251126*	0.467421*	0.453208*	0.42768*
34.09	0.237978*	0.454004*	0.438705*	0.424482*
34.14	0.254974*	0.457728*	0.438702*	0.438862*
34.19	0.247779*	0.453209*	0.441506*	0.43534*
34.24	0.251136*	0.474869*	0.447917*	0.431999*
34.24	0.246892*	0.448845*	0.439089*	0.424818*
34.3	0.242718*	0.458002*	0.439005*	0.427508*
34.35	0.245176*	0.462259*	0.434157*	0.428018*
34.4	0.230718*	0.460802*	0.439828*	0.418273*
34.45	0.237903*	0.454159*	0.431731*	0.417488*
34.54	0.228592*	0.45895*	0.44338*	0.426912*
34.59	0.226972*	0.457362*	0.438367*	0.421307*
34.65	0.235381*	0.453771*	0.434911*	0.408539*
34.7	0.232037*	0.448861*	0.430273*	0.401825*
34.7	0.228197*	0.452985*	0.425345*	0.403589*
34.8	0.225671*	0.454444*	0.435588*	0.401826*
34.8	0.220925*	0.448603*	0.429987*	0.400238*
34.85	0.223542*	0.445155*	0.433828*	0.403273*
34.9	0.206558*	0.447015*	0.421456*	0.396088*
34.95	0.212434*	0.457913*	0.419392*	0.394492*
35	0.2184*	0.451935*	0.429637*	0.39705*
35.05	0.206162*	0.439187*	0.422861*	0.392892*
35.09	0.212852*	0.428556*	0.418002*	0.384752*
35.19	0.222252*	0.442251*	0.423978*	0.386676*
35.2	0.200099*	0.443442*	0.410939*	0.394828*
35.25	0.192917*	0.438928*	0.42258*	0.375491*
35.3	0.196659*	0.438664*	0.411675*	0.383967*
35.35	0.204761*	0.432686*	0.418385*	0.380767*
35.39	0.21326*	0.419665*	0.418383*	0.382208*
35.44	0.205067*	0.433207*	0.415289*	0.37837*
35.48	0.208515*	0.44173*	0.412799*	0.373418*
35.54	0.194957*	0.427909*	0.412061*	0.374222*
35.59	0.19243*	0.436828*	0.411694*	0.371027*
35.64	0.19627*	0.425259*	0.406029*	0.372149*
35.69	0.200525*	0.417817*	0.404257*	0.36064*
35.74	0.196783*	0.43485*	0.415179*	0.372313*
35.74	0.186974*	0.422619*	0.401772*	0.358572*
35.83	0.191627*	0.42673*	0.405682*	0.368963*
35.88	0.187085*	0.418784*	0.399948*	0.365613*
35.93	0.185767*	0.408423*	0.395391*	0.356191*
35.97	0.181923*	0.41812*	0.397528*	0.352192*
36.02	0.176071*	0.416536*	0.388998*	0.355245*
36.07	0.167576*	0.420259*	0.388995*	0.350929*
36.13	0.171432*	0.410566*	0.401009*	0.344869*
36.17	0.184964*	0.403921*	0.396436*	0.352687*
36.22	0.174355*	0.400205*	0.392908*	0.338319*
36.26	0.168387*	0.400603*	0.387975*	0.342939*
36.31	0.177688*	0.392091*	0.383398*	0.35077*
36.35	0.162018*	0.404322*	0.389745*	0.340067*
36.4	0.17901*	0.40061*	0.393282*	0.335755*
36.46	0.17517*	0.397288*	0.393647*	0.344703*
36.51	0.182357*	0.392492*	0.382002*	0.338145*
36.55	0.169606*	0.39622*	0.369637*	0.339593*
36.55	0.15898*	0.386921*	0.371407*	0.335275*
36.65	0.164556*	0.386137*	0.374222*	0.331772*
36.74	0.162036*	0.391329*	0.370327*	0.328583*
36.74	0.163757*	0.383501*	0.373503*	0.32827*
36.83	0.155671*	0.378322*	0.373864*	0.318523*
36.83	0.152751*	0.386834*	0.376687*	0.322215*
36.88	0.158197*	0.378717*	0.368946*	0.315973*
36.97	0.151826*	0.386159*	0.368946*	0.31741*
37.03	0.151826*	0.382438*	0.363642*	0.318844*
37.07	0.157807*	0.374612*	0.366819*	0.305596*
37.12	0.15488*	0.364534*	0.364329*	0.316472*
37.16	0.142937*	0.370902*	0.354456*	0.304165*
37.21	0.142144*	0.373837*	0.348436*	0.315034*
37.25	0.154089*	0.37678*	0.358324*	0.305792*
37.31	0.158607*	0.373547*	0.362262*	0.310545*
37.35	0.142146*	0.364547*	0.350217*	0.30355*
37.4	0.133254*	0.364168*	0.33926*	0.306115*
37.44	0.147728*	0.361917*	0.349505*	0.298615*
37.49	0.129951*	0.359279*	0.350553*	0.296555*
37.54	0.144686*	0.361238*	0.338219*	0.300994*
37.58	0.132475*	0.348519*	0.34915*	0.293994*
37.63	0.140041*	0.355272*	0.334331*	0.281997*
37.67	0.130351*	0.357824*	0.331492*	0.296878*
37.72	0.124785*	0.345593*	0.333982*	0.293193*
37.81	0.144694*	0.350085*	0.347069*	0.295246*
37.81	0.140041*	0.355279*	0.336107*	0.28056*
37.87	0.139647*	0.33444*	0.337523*	0.278821*
37.96	0.133416*	0.349229*	0.335729*	0.290206*
38	0.120144*	0.350791*	0.333629*	0.284259*
38.04	0.115108*	0.351872*	0.336456*	0.286518*
38.08	0.130507*	0.342895*	0.324427*	0.273788*
38.08	0.120694*	0.334381*	0.332213*	0.277284*
38.18	0.116846*	0.338486*	0.31491*	0.277595*
38.23	0.116442*	0.330669*	0.32692*	0.272977*
38.32	0.11472*	0.323621*	0.318448*	0.274728*
38.32	0.121087*	0.332911*	0.313161*	0.270415*
38.36	0.119361*	0.329591*	0.311754*	0.266414*
38.36	0.12613*	0.324403*	0.319172*	0.269597*
38.49	0.115128*	0.324018*	0.311761*	0.262111*
38.54	0.112607*	0.323636*	0.318467*	0.254617*
38.59	0.118043*	0.326656*	0.312474*	0.258417*
38.63	0.103335*	0.330307*	0.307168*	0.255445*
38.63	0.101604*	0.315826*	0.302222*	0.248568*
38.73	0.091783*	0.312887*	0.281745*	0.249188*
38.77	0.10625*	0.308776*	0.299052*	0.253195*
38.82	0.101613*	0.312122*	0.296933*	0.250011*
38.86	0.114351*	0.310262*	0.300476*	0.255764*
38.89	0.100284*	0.305453*	0.299416*	0.247754*
38.94	0.103744*	0.306547*	0.295177*	0.248582*
38.99	0.111688*	0.308083*	0.289533*	0.245492*
38.99	0.11475*	0.306937*	0.290241*	0.250324*
39.13	0.108783*	0.301747*	0.288834*	0.237703*
39.17	0.106655*	0.298028*	0.288832*	0.242013*
39.21	0.086773*	0.302845*	0.288125*	0.242844*
39.26	0.09432*	0.300285*	0.283893*	0.235139*
39.27	0.083702*	0.294708*	0.285671*	0.236578*
39.35	0.095497*	0.294002*	0.281427*	0.237492*
39.39	0.099357*	0.295473*	0.27755*	0.234321*
39.48	0.092215*	0.292861*	0.271544*	0.230838*
39.48	0.094333*	0.29286*	0.276846*	0.227963*
39.57	0.080651*	0.299588*	0.279673*	0.22744*
39.57	0.093391*	0.297738*	0.277915*	0.227445*
39.62	0.094724*	0.276521*	0.273676*	0.218213*
39.66	0.079087*	0.290632*	0.269441*	0.226229*
39.71	0.068864*	0.279863*	0.259193*	0.21935*
39.78	0.087582*	0.281338*	0.274741*	0.219047*
39.83	0.075231*	0.281732*	0.257436*	0.216479*
39.87	0.079479*	0.27429*	0.266268*	0.212171*
39.92	0.078146*	0.282497*	0.259913*	0.22859*
40.01	0.080272*	0.273211*	0.26345*	0.205592*
40.05	0.088925*	0.273157*	0.258165*	0.209831*
40.1	0.070996*	0.26873*	0.253917*	0.209303*
40.1	0.079884*	0.265401*	0.247204*	0.205297*
40.14	0.082797*	0.262436*	0.254976*	0.211649*
40.22	0.066359*	0.262782*	0.248277*	0.198942*
40.26	0.081225*	0.257205*	0.253588*	0.207575*
40.26	0.083746*	0.265024*	0.253931*	0.204993*
40.36	0.071002*	0.259445*	0.24157*	0.196378*
40.44	0.077765*	0.261689*	0.245459*	0.193809*
40.49	0.067156*	0.269133*	0.234855*	0.198119*
40.53	0.06889*	0.255741*	0.227452*	0.203569*
40.57	0.05984*	0.249823*	0.232382*	0.190405*
40.61	0.054422*	0.257983*	0.226038*	0.186634*
40.66	0.054028*	0.244593*	0.225696*	0.18633*
40.74	0.07141*	0.246832*	0.231347*	0.186639*
40.74	0.067949*	0.247599*	0.224969*	0.191543*
40.83	0.075256*	0.253896*	0.232769*	0.193522*
40.87	0.060018*	0.240506*	0.223588*	0.171663*
40.91	0.065051*	0.243124*	0.227825*	0.185206*
40.96	0.073152*	0.229743*	0.229242*	0.18203*
41.01	0.049797*	0.23346*	0.229246*	0.182028*
41.05	0.064657*	0.240893*	0.220418*	0.190657*
41.09	0.058511*	0.228287*	0.211901*	0.17665*
41.17	0.067574*	0.234226*	0.215819*	0.175451*
41.21	0.061978*	0.234987*	0.21298*	0.16455*
41.25	0.055996*	0.227919*	0.208031*	0.1706*
41.3	0.050189*	0.22641*	0.222537*	0.167964*
41.34	0.052321*	0.231998*	0.21372*	0.165095*
41.38	0.054448*	0.226429*	0.203114*	0.163661*
41.43	0.049422*	0.216373*	0.204192*	0.161629*
41.47	0.059262*	0.221207*	0.205278*	0.158162*
41.51	0.049821*	0.211183*	0.204555*	0.159055*
41.58	0.050203*	0.218991*	0.201369*	0.160792*
41.63	0.05446*	0.207841*	0.194304*	0.157922*
41.68	0.038428*	0.206734*	0.196801*	0.167084*
41.72	0.041327*	0.222346*	0.195734*	0.150442*
41.76	0.054458*	0.207845*	0.192535*	0.152174*
41.84	0.048089*	0.220865*	0.204906*	0.15361*
41.89	0.052728*	0.211948*	0.185825*	0.151036*
41.93	0.049822*	0.213061*	0.188669*	0.154755*
41.98	0.04346*	0.207494*	0.193966*	0.156188*
42.01	0.038057*	0.200789*	0.187642*	0.145249*
42.09	0.054077*	0.203771*	0.179852*	0.150454*
42.13	0.03246*	0.190386*	0.190094*	0.14009*
42.17	0.030343*	0.199693*	0.172443*	0.141539*
42.22	0.040385*	0.208625*	0.177354*	0.147034*
42.27	0.038061*	0.189656*	0.177067*	0.140947*
42.31	0.037878*	0.197102*	0.180546*	0.140989*
42.39	0.037884*	0.198963*	0.180553*	0.142428*
42.43	0.047329*	0.190409*	0.163629*	0.128615*
42.46	0.036335*	0.197477*	0.173893*	0.126879*
42.5	0.041355*	0.192651*	0.169278*	0.126037*
42.59	0.032475*	0.182974*	0.163633*	0.135801*
42.63	0.037892*	0.185957*	0.159369*	0.129502*
42.67	0.037501*	0.174436*	0.159025*	0.13496*
42.72	0.036726*	0.173699*	0.165414*	0.12575*
42.76	0.035377*	0.168865*	0.162566*	0.132088*
42.8	0.036732*	0.179274*	0.165409*	0.124306*
42.84	0.029592*	0.171102*	0.154145*	0.123727*
42.92	0.039245*	0.175932*	0.155161*	0.128919*
42.96	0.034992*	0.17036*	0.153405*	0.123178*
43	0.025732*	0.162185*	0.152722*	0.125459*
43.04	0.042146*	0.17483*	0.154081*	0.12664*
43.12	0.04484*	0.1752*	0.149192*	0.116838*
43.16	0.026897*	0.170736*	0.159051*	0.117725*
43.2	0.035394*	0.170743*	0.153759*	0.110539*
43.25	0.032103*	0.16219*	0.145667*	0.115405*
43.29	0.025939*	0.179305*	0.156544*	0.101356*
43.36	0.026134*	0.168153*	0.146018*	0.112832*
43.4	0.032501*	0.166292*	0.146018*	0.115708*
43.44	0.024396*	0.164815*	0.137528*	0.110252*
43.48	0.035398*	0.16146*	0.139638*	0.111984*
43.53	0.03289*	0.161089*	0.144597*	0.103073*
43.57	0.035791*	0.150684*	0.125854*	0.112287*
43.65	0.029037*	0.15403*	0.137879*	0.103368*
43.69	0.023055*	0.152545*	0.136454*	0.100785*
43.76	0.029422*	0.143251*	0.129391*	0.096478*
43.8	0.024791*	0.152185*	0.129051*	0.097623*
43.85	0.016302*	0.142882*	0.127289*	0.096182*
43.89	0.021515*	0.14922*	0.135107*	0.092442*
43.93	0.019777*	0.145876*	0.124854*	0.098478*
43.97	0.030773*	0.140665*	0.123425*	0.100211*
44.01	0.019393*	0.136211*	0.133345*	0.099627*
44.09	0.026535*	0.1351*	0.119897*	0.088716*
44.13	0.015917*	0.135098*	0.1146*	0.094464*
44.13	0.022677*	0.13361*	0.122009*	0.083259*
44.24	0.027499*	0.135856*	0.12066*	0.087849*
44.28	0.031751*	0.135861*	0.106535*	0.0936*
44.32	0.03213*	0.138089*	0.1263*	0.095327*
44.36	0.031357*	0.137349*	0.09913*	0.081814*
44.4	0.031363*	0.126211*	0.118562*	0.081814*
44.45	0.032316*	0.132538*	0.122848*	0.079509*
44.53	0.020941*	0.12995*	0.106291*	0.080364*
44.57	0.017282*	0.134381*	0.101579*	0.078085*
44.61	0.019402*	0.112085*	0.10336*	0.080962*
44.67	0.035607*	0.133649*	0.099148*	0.077511*
44.71	0.027897*	0.119521*	0.105123*	0.079529*
44.76	0.02674*	0.120281*	0.105884*	0.071475*
44.8	0.022497*	0.124004*	0.102349*	0.078663*
44.88	0.029245*	0.113214*	0.099163*	0.067457*
44.92	0.029247*	0.122518*	0.092103*	0.0689*
44.96	0.029258*	0.115087*	0.093872*	0.070336*
45.03	0.021925*	0.106887*	0.089582*	0.072646*
45.08	0.030034*	0.108388*	0.085716*	0.073795*
45.11	0.025398*	0.10802*	0.090678*	0.056259*
45.15	0.031761*	0.119176*	0.090675*	0.066316*
45.19	0.027128*	0.100227*	0.083289*	0.070344*
45.26	0.03099*	0.111017*	0.082958*	0.058565*
45.3	0.021162*	0.104314*	0.08009*	0.067762*
45.39	0.027136	0.105815*	0.08506*	0.057418*
45.43	0.022503	0.103588*	0.090025*	0.057131*
45.43	0.009193	0.090183*	0.077241*	0.055411*
45.5	0.026951	0.103922*	0.083204*	0.054548*
45.53	0.031373	0.105821*	0.076241*	0.05311*
45.61	0.024824	0.092771*	0.074373*	0.055984*
45.65	0.020771	0.089104*	0.079774*	0.063171*
45.66	0.019422	0.099118*	0.07338*	0.055127*
45.73	0.024237	0.088372*	0.077345*	0.052538*
45.81	0.019036	0.085752*	0.069517*	0.051967*
45.85	0.027536	0.095041*	0.067752*	0.049091*
45.89	0.031203	0.085353*	0.069085*	0.043054*
45.92	0.031207	0.085351*	0.069092*	0.045936*
45.97	0.020201	0.09056*	0.068754*	0.047087*
46.04	0.013834	0.084996*	0.059926*	0.047088*
46.08	0.019813	0.079052*	0.06843*	0.048238*
46.15	0.021945	0.090213*	0.066665*	0.048239*
46.19	0.019247	0.076789*	0.071535*	0.04939*
46.23	0.032367	0.075299*	0.06657*	0.042488*
46.27	0.040475	0.082375*	0.0733*	0.042201*
46.35	0.033156	0.076028*	0.04426*	0.043071*
46.39	0.022718	0.06678*	0.063808*	0.041626*
46.41	0.032761	0.071941*	0.058074*	0.039908*
46.49	0.026004	0.069728*	0.055976*	0.029555*
46.53	0.036613	0.056712*	0.043604*	0.035307*
46.57	0.023107	0.069004*	0.048255*	0.037615*
46.61	0.031215	0.064926*	0.046152*	0.02726*
46.69	0.038353	0.073094*	0.055646*	0.036461*
46.72	0.027353	0.063434*	0.041186*	0.03474*
46.76	0.024834	0.061214*	0.044389*	0.043074*
46.84	0.031209	0.064933*	0.054991*	0.027266*
46.85	0.036231	0.050778*	0.050354*	0.033585*
46.91	0.035462	0.057503*	0.039094*	0.027265*
46.95	0.03469	0.062359*	0.041978*	0.019514*
47.02	0.039316	0.072013*	0.054662*	0.031287*
47.06	0.029087	0.053784*	0.047929*	0.035892*
47.1	0.036231	0.05637*	0.041532*	0.023529*
47.14	0.040665	0.065723*	0.034575*	0.035033*
47.21	0.03044	0.053076*	0.03845*	0.019515*
47.25	0.026006	0.045582*	0.038335*	0.018064*
47.29	0.036629	0.053018*	0.04187*	0.025255*
47.32	0.038363	0.048935*	0.03447*	0.024966*
47.39	0.031988	0.050802*	0.029168*	0.022092*
47.44	0.044345	0.046725*	0.030609*	0.021815*
47.51	0.031793	0.03378*	0.030732*	0.016078*
47.55	0.034684	0.040074*	0.019038*	0.019531*
47.58	0.034684	0.041932*	0.033161*	0.010899*
47.66	0.044345	0.043009*	0.025313*	0.014627*
47.7	0.046858	0.047089*	0.030951*	0.01204*
47.74	0.038359	0.035935*	0.03272*	0.012036*
47.8	0.039708	0.046372*	0.028526*	0.015778*
47.84	0.046467	0.039301*	0.023564*	0.02038*
47.88	0.042611	0.037795*	0.03272*	0.016349*
47.95	0.054572	0.024076*	0.023235*	0.007165*
47.99	0.053617	0.02514*	0.015383*	0.008013*
48.03	0.065963	0.037804*	0.027423*	0.006287*
48.11	0.057465	0.034091*	0.022128*	0.004853*
48.14	0.058817	0.038954*	0.009101*	0.005723*
48.18	0.048197	0.024079*	0.016174*	0.0086*
48.24	0.046075	0.031518*	0.025011*	0.011475*
48.28	0.061892	0.028584*	0.018716*	0.017804*
48.32	0.059773	0.041595*	0.011665*	0.00057*
48.4	0.058422	0.033018*	0.017618*	0.002568*
48.43	0.065181	0.022224*	0.009108*	0.004283*
48.47	0.063059	0.027804*	0.00911*	0.005725*
48.51	0.067304	0.020372*	0.023241*	0.007158*
48.58	0.058813	0.022229*	0.012644*	0.011474*
48.62	0.071556	0.016654*	0.012653*	-0.00146*
48.65	0.066746	0.010651*	0.001597*	0.005428*
48.72	0.055909	0.017804*	0.004935*	0.008037*
48.76	0.066738	0.016224*	0.008664*	0.001108*
48.83	0.067692	0.022593*	0.009454*	0.003137*
48.87	0.07484	0.010294*	0.008338*	0.00226*
48.91	0.068479	0.002863*	-0.00579*	-0.00348*
48.98	0.065178	0.00737*	0.000295*	-0.00433*
49.02	0.07445	0.015514*	-0.00259*	-0.0052*
49.05	0.070369	0.01002*	0.001081*	-0.00087*
49.11	0.068637	0.0048*	-0.00566*	-0.00346*
49.16	0.077353	0.012512*	-0.00193*	-0.0104*
49.23	0.086396	0.012948*	0.003832*	-0.000024*
49.27	0.071941	0.011447*	-0.0082*	-0.00117*
49.3	0.082546	0.004015*	0.009461*	-0.00405*
49.34	0.087179	0.000647*	-0.00082*	-0.00665*
49.41	0.074826	0.014026*	-0.00403*	-0.00349*
49.45	0.087572	-0.00085*	0.010118*	-0.00492*
49.49	0.083726	0.001364*	-0.01076*	-0.00752*
49.55	0.089308	0.006231*	-0.00788*	0.000541*
49.59	0.101497	-0.0128*	-0.01012*	-0.01558*
49.66	0.092609	-0.00386*	-0.0069*	-0.00867*
49.7	0.10787	-0.00722*	-0.01011*	-0.00408*
49.73	0.10417	-0.00492*	-0.00964*	-0.00377*
49.8	0.085448	-0.00829*	0.001284*	-0.0078*
49.84	0.10283	-0.00793*	-0.01783*	-0.00608*
49.88	0.110138	-0.00899*	-0.00467*	-0.00405*
49.95	0.116359	-0.01094*	-0.01541*	-0.00696*
49.98	0.126185	0.001368*	-0.009*	-0.00753*
50.05	0.115961	-0.00756*	-0.00159*	-0.00149*
50.09	0.118481	-0.00349*	-0.01187*	-0.00408*
50.12	0.113832	-0.00757	-0.01927	-0.013
50.19	0.129503	-0.0143	-0.00093	-0.00092
50.23	0.120205	-0.01501	-0.01927	-0.0058
50.27	0.126718	-0.00747	-0.00322	-0.00865
50.34	0.150341	-0.01837	-0.02071	-0.00984
50.38	0.140258	-0.00119	-0.00964	0.001973
50.44	0.126968	-0.01465	-0.0101	-0.00983
50.47	0.14569	-0.01687	-0.01927	-0.0058
50.55	0.144485	-0.01792	-0.01141	-0.00953
50.58	0.149533	-0.00978	-0.00723	-0.00178
50.62	0.13984	-0.0127	-0.01527	-0.00406
50.66	0.146607	-0.00863	-0.02024	-0.00522
50.73	0.133073	-0.01491	-0.01382	-0.00435
50.76	0.153383	-0.02315	-0.01814	-0.0035
50.84	0.150055	-0.01491	-0.01912	-0.00579
50.86	0.158542	-0.01862	-0.01912	-0.0101
50.93	0.152576	-0.01454	-0.02056	-0.00406
50.97	0.16915	-0.01118	-0.01382	-0.00291
51	0.169955	-0.01978	-0.03084	-0.01097
51.08	0.159339	-0.02163	-0.022	-0.00665
51.11	0.166509	-0.03209	-0.02489	-0.00179
51.15	0.177235	-0.02455	-0.02298	-0.0032
51.22	0.167014	-0.02606	-0.01735	-0.00436
51.25	0.178552	-0.01597	-0.02363	-0.00233
51.31	0.194318	-0.02631	-0.014	0.004009
51.39	0.183594	-0.01526	-0.02651	-0.00033
51.42	0.187028	-0.02526	-0.02009	-0.00233
51.46	0.183191	-0.02676	-0.02154	0.003693
51.49	0.207349	-0.01677	-0.01382	-0.00149
51.53	0.200168	-0.02677	-0.01448	0.000817
51.6	0.198452	-0.02641	-0.01414	-0.00033
51.67	0.204412	-0.02305	-0.02154	0.005132
51.71	0.199359	-0.03118	-0.02571	-0.00405
51.73	0.209053	-0.03199	-0.02121	0.002536
51.8	0.211176	-0.02641	-0.01768	0.008282
51.83	0.222195	-0.03535	-0.01735	0.007128
51.91	0.223503	-0.03605	-0.02507	0.013747
51.94	0.226034	-0.0227	-0.02121	0.005404
51.98	0.226028	-0.02269	-0.02474	0.00541
52.04	0.220966	-0.03455	-0.02363	0.010583
52.08	0.242183	-0.02526	-0.02716	0.003394
52.16	0.247657	-0.03164	-0.01558	0.008555
52.18	0.251079	-0.02304	-0.01624	0.013737
52.25	0.248057	-0.02756	-0.0135	0.017457
52.28	0.252306	-0.02757	-0.01173	0.017458
52.32	0.263811	-0.03048	-0.01095	0.016599
52.38	0.256138	-0.03721	-0.01029	0.014292
52.43	0.265444	-0.01792	-0.02201	0.019174
52.49	0.264621	-0.02606	-0.01913	0.018605
52.53	0.282838	-0.02686	-0.01463	0.012263
52.6	0.278176	-0.02908	-0.02202	0.024912
52.62	0.285848	-0.02234	-0.01384	0.028657
52.66	0.292623	-0.03872	-0.01351	0.028945
52.73	0.297276	-0.0328	-0.02378	0.019159
52.77	0.307947	-0.0327	-0.01834	0.027791
52.8	0.29727	-0.02908	-0.00965	0.030661
52.87	0.316377	-0.0235	-0.01495	0.032095
52.9	0.31301	-0.03571	-0.01593	0.028353
52.97	0.324037	-0.03164	-0.01737	0.034388
53	0.324448	-0.02571	-0.01705	0.036114
53.06	0.323158	-0.03431	-0.01463	0.029496
53.1	0.332101	-0.03013	-0.00357	0.044159
53.17	0.341848	-0.02908	-0.00259	0.03208
53.21	0.349083	-0.0227	-0.01595	0.038401
53.27	0.349497	-0.02978	-0.02267	0.031506
53.31	0.352481	-0.02341	-0.01482	0.039263
53.34	0.360527	-0.03874	-0.00999	0.041841
53.41	0.364351	-0.01677	-0.00679	0.044432
53.44	0.383016	-0.0321	-0.00548	0.036949
53.51	0.386418	-0.02351	0.000933	0.047875
53.54	0.390237	-0.01642	-0.01177	0.04902
53.61	0.401276	-0.02537	-0.00791	0.050745
53.64	0.400428	-0.01864	0.000277	0.061664
53.71	0.411886	-0.01793	-0.01321	0.056488
53.74	0.408909	-0.0205	0.003805	0.061659
53.78	0.416978	-0.02467	-0.00195	0.058498
53.85	0.433101	-0.02528	-0.00601	0.056478
53.91	0.439065	-0.02396	0.000456	0.064822
53.94	0.452215	-0.02909	0.000924	0.060789
54.01	0.460274	-0.01829	-0.00294	0.066245
54.04	0.449229	-0.01307	0.007327	0.068828
54.07	0.44328	-0.02016	-0.00295	0.07343
54.15	0.470448	-0.01866	0.003788	0.077445
54.18	0.473002	-0.02016	0.007649	0.069107
54.25	0.476385	-0.00971	0.015828	0.082902
54.31	0.481485	-0.01644	0.007651	0.076292
54.35	0.498903	-0.01051	0.013266	0.070825
54.38	0.495909	-0.02238	0.005557	0.081747
54.44	0.500584	-0.00901	0.018242	0.087781
54.47	0.50825	-0.00795	0.01745	0.087208
54.51	0.508637	-0.01309	0.009076	0.091795
54.58	0.520935	-0.01344	0.02817	0.101555
54.61	0.535854	-0.01539	0.019219	0.091515
54.68	0.517552	-0.00158	0.030597	0.09926
54.71	0.534099	-0.00379	0.016136	0.106158
54.78	0.546458	-0.0061	0.026284	0.100129
54.84	0.550706	-0.00423	0.02098	0.108757
54.87	0.551517	0.002139	0.025288	0.112183
54.94	0.551945	-0.00681	0.03268	0.113909
54.97	0.556195	0.00063	0.027383	0.1096
55.01	0.561312	-0.00797	0.031575	0.115933
55.07	0.576536	-0.00567	0.035548	0.116188
55.1	0.585108	0.005409	0.037195	0.126284
55.17	0.583337	0.009556	0.048242	0.132286
55.21	0.594751	0.006638	0.033119	0.124215
55.24	0.600318	0.007699	0.039398	0.133716
55.3	0.600759	0.009909	0.041501	0.134011
55.36	0.613053	0.013274	0.044696	0.135145
55.4	0.60925	0.015486	0.045031	0.139755
55.43	0.618976	0.009194	0.051443	0.140597
55.5	0.620647	0.005116	0.042268	0.144607
55.57	0.630365	0.015553	0.050429	0.154064
55.6	0.643657	0.01397	0.055948	0.163037
55.63	0.628341	0.024769	0.060922	0.158424
55.7	0.645213	0.019261	0.06102	0.16268
55.75	0.646562	0.018475	0.058485	0.170752
55.79	0.655039	0.035207	0.060242	0.175061
55.86	0.660063	0.019257	0.068071	0.174155
55.89	0.656383	0.028837	0.064778	0.173083
55.96	0.676258	0.020325	0.069069	0.177927
55.99	0.658497	0.021394	0.0736	0.181694
56.05	0.675491	0.023248	0.084208	0.186009
56.09	0.683972	0.028823	0.080665	0.187437
56.12	0.68184	0.03441	0.084203	0.191751
56.18	0.684746	0.033327	0.086732	0.198033
56.24	0.69201	0.0359	0.087391	0.204376
56.28	0.691101	0.037039	0.084955	0.210954
56.34	0.708536	0.042974	0.085282	0.206939
56.37	0.703519	0.042187	0.10219	0.216474
56.44	0.713237	0.043331	0.105054	0.215866
56.47	0.707763	0.045909	0.086277	0.223654
56.51	0.725964	0.052616	0.103277	0.22304
56.54	0.714128	0.049621	0.103944	0.232277
56.63	0.731884	0.05598	0.108237	0.231354
56.69	0.728231	0.048832	0.110255	0.236055
56.73	0.739905	0.061187	0.123794	0.243977
56.76	0.739144	0.06598	0.115975	0.250647
56.82	0.746886	0.067072	0.122291	0.257319
56.9	0.737323	0.062675	0.12698	0.250846
56.93	0.746268	0.061174	0.127316	0.255457
56.96	0.747627	0.082717	0.135391	0.260691
57.02	0.740051	0.062982	0.134309	0.267061
57.05	0.766284	0.067475	0.143884	0.281937
57.11	0.784643	0.075993	0.137835	0.272798
57.17	0.779018	0.078614	0.14741	0.283363
57.21	0.787507	0.071177	0.154479	0.291986
57.28	0.775217	0.078974	0.15481	0.292294
57.31	0.778716	0.076338	0.154072	0.309043
57.34	0.778087	0.090895	0.160855	0.308602
57.41	0.788694	0.076018	0.164383	0.317222
57.44	0.787028	0.094976	0.168259	0.317529
57.5	0.797183	0.09275	0.169669	0.321523
57.56	0.804935	0.099412	0.174237	0.321023
57.6	0.810574	0.096782	0.175269	0.329151
57.66	0.804935	0.101274	0.181304	0.335394
57.69	0.812497	0.102403	0.184146	0.33763
57.75	0.826432	0.105379	0.18875	0.354248
57.82	0.829677	0.119098	0.198231	0.347828
57.86	0.818404	0.11876	0.194392	0.351679
57.89	0.815803	0.120244	0.201105	0.361417
57.94	0.8243	0.120242	0.209929	0.368593
58.01	0.820041	0.118383	0.208165	0.371469
58.04	0.823564	0.125054	0.216275	0.373855
58.1	0.831858	0.13437	0.219825	0.386624
58.13	0.839146	0.140673	0.229349	0.39301
58.2	0.825215	0.135841	0.235354	0.390772
58.23	0.828533	0.13324	0.227582	0.400189
58.3	0.854004	0.14253	0.241707	0.411679
58.33	0.843385	0.153686	0.243474	0.426046
58.38	0.840797	0.145874	0.243123	0.4171
58.44	0.849748	0.144384	0.259367	0.414541
58.48	0.853047	0.158503	0.263951	0.425378
58.55	0.851864	0.164819	0.262897	0.440407
58.58	0.868852	0.168536	0.271722	0.441835
58.64	0.857051	0.171139	0.272429	0.44967
58.67	0.854452	0.18563	0.279137	0.459398
58.74	0.857041	0.178566	0.283022	0.466909
58.77	0.862227	0.188612	0.296096	0.471873
58.83	0.862473	0.183396	0.299975	0.476304
58.89	0.857041	0.182277	0.300676	0.482708
58.92	0.878272	0.202732	0.304206	0.49564
58.99	0.864817	0.198272	0.310577	0.495192
59.05	0.870241	0.191939	0.313396	0.494528
59.08	0.882982	0.201235	0.311624	0.500266
59.14	0.87542	0.205702	0.32647	0.503804
59.18	0.880854	0.199368	0.336353	0.517512
59.21	0.884162	0.219063	0.333864	0.52403
59.26	0.890994	0.215717	0.34659	0.525794
59.33	0.889815	0.225762	0.343774	0.535087
59.36	0.885562	0.233209	0.359675	0.542267
59.42	0.885566	0.225769	0.364969	0.54945
59.46	0.898316	0.248074	0.359665	0.553765
59.52	0.891465	0.242122	0.378736	0.554858
59.58	0.898781	0.252174	0.374161	0.561276
59.61	0.894525	0.252165	0.388291	0.575644
59.68	0.884126	0.248484	0.383045	0.578781
59.7	0.90042	0.259222	0.400295	0.591121
59.76	0.904193	0.268135	0.398161	0.590778
59.8	0.914815	0.286728	0.401687	0.597962
59.86	0.90726	0.27075	0.413024	0.600075
59.89	0.907266	0.281909	0.420087	0.614451
59.95	0.914574	0.292242	0.431651	0.622112
60.02	0.909146	0.287431	0.43768	0.62423
60.05	0.919527	0.300118	0.426774	0.631346
60.12	0.907974	0.299348	0.443709	0.634973
60.14	0.921651	0.30383	0.455052	0.645721
60.2	0.914803	0.320174	0.459976	0.646809
60.26	0.925424	0.318314	0.472344	0.652549
60.29	0.923773	0.322416	0.470942	0.667266
60.35	0.924947	0.323505	0.479036	0.669455
60.38	0.931308	0.343954	0.493161	0.669447
60.42	0.933428	0.334654	0.494931	0.676627
60.49	0.932487	0.350604	0.503013	0.68024
60.55	0.930134	0.35959	0.509808	0.688818
60.58	0.935085	0.352848	0.510441	0.694952
60.63	0.93084	0.350978	0.517503	0.70357
60.69	0.934862	0.372998	0.52962	0.706413
60.73	0.945702	0.373288	0.5334	0.706441
60.79	0.939803	0.377401	0.535542	0.716855
60.85	0.94712	0.381896	0.553967	0.727616
60.88	0.931304	0.386688	0.542604	0.718282
60.94	0.935556	0.397847	0.563801	0.731215
60.97	0.943353	0.397157	0.561407	0.73802
61.03	0.941921	0.403416	0.569105	0.738395
61.07	0.941231	0.406455	0.57908	0.748084
61.13	0.957953	0.411917	0.586004	0.747745
61.19	0.956783	0.423858	0.584991	0.759945
61.22	0.947813	0.417884	0.591676	0.756716
61.28	0.956789	0.431292	0.618562	0.764257
61.31	0.948978	0.448684	0.608564	0.766058
61.37	0.964325	0.44164	0.614251	0.769284
61.44	0.952057	0.449479	0.616403	0.785451
61.46	0.945913	0.451593	0.62721	0.784011
61.52	0.946164	0.477763	0.630913	0.781488
61.58	0.967606	0.468725	0.632895	0.79155
61.64	0.959598	0.46912	0.645644	0.793341
61.67	0.94829	0.487057	0.655646	0.801606
61.71	0.953491	0.484137	0.652888	0.799447
61.77	0.968619	0.50475	0.668973	0.808438
61.83	0.958905	0.49634	0.671539	0.801599
61.86	0.96411	0.506442	0.677617	0.809498
61.91	0.971442	0.510969	0.676642	0.81598
61.97	0.961296	0.516957	0.677022	0.820647
62.01	0.96198	0.521314	0.704116	0.823869
62.07	0.966698	0.534736	0.695676	0.8343
62.11	0.958207	0.540312	0.70628	0.822794
62.17	0.973554	0.54258	0.706671	0.830349
62.2	0.972114	0.546928	0.712555	0.830693
62.26	0.978278	0.561584	0.728271	0.840764
62.32	0.970475	0.558497	0.728852	0.849744
62.35	0.970738	0.564262	0.727295	0.840055
62.41	0.968351	0.573368	0.735917	0.855491
62.47	0.975884	0.578116	0.733349	0.853317
62.5	0.97711	0.590301	0.75558	0.854437
62.56	0.991509	0.595466	0.746338	0.845441
62.62	0.983688	0.59237	0.753976	0.864474
62.66	0.985817	0.603527	0.764584	0.857283
62.72	0.99075	0.605998	0.759843	0.869124
62.75	0.986978	0.617567	0.777913	0.869486
62.8	0.99171	0.614261	0.783615	0.86122
62.83	0.995959	0.629137	0.778307	0.871286
62.89	0.982045	0.628109	0.780875	0.876333
62.96	0.998081	0.638429	0.794208	0.871282
62.99	0.988422	0.648571	0.789718	0.886397
63.05	1.000682*	0.64814	0.80345	0.875966
63.08	0.99643*	0.651858	0.803445	0.881708
63.14	1.004931*	0.672318	0.814045	0.894646
63.2	0.99787*	0.666135	0.80642	0.892878
63.22	1.009655*	0.683898	0.809152	0.893579
63.28	1.016026*	0.685754	0.810913	0.88926
63.34	1.007335*	0.681865	0.819604	0.896489
63.4	0.992665*	0.687608	0.825051	0.902201
63.43	0.993146*	0.695471	0.834293	0.891067
63.49	1.014874*	0.703331	0.834698	0.897186
63.52	1.003568*	0.695299	0.832387	0.898287
63.59	1.014876*	0.723793	0.841765	0.902935
63.62	1.002122*	0.710769	0.847069	0.910124
63.68	1.022406*	0.7248	0.84272	0.905065
63.73	1.008495*	0.725647	0.845295	0.90868
63.79	1.002116*	0.733089	0.847071	0.904366
63.82	1.008984*	0.740961	0.856316	0.91624
63.89	1.023361*	0.753553	0.862978	0.91731
63.92	1.023665*	0.750107	0.863253	0.916293
63.98	1.015351*	0.753972	0.873993	0.924869
64.01	1.02385*	0.768856	0.872222	0.917673
64.07	1.021728*	0.765124	0.865143	0.919107
64.1	1.023181*	0.773867	0.875228	0.918788
64.15	1.031193*	0.771573	0.880112	0.932804
64.22	1.016807*	0.783161	0.873443	0.936047
64.28	1.026462*	0.765558	0.879698	0.926674
64.3	1.04085*	0.781871	0.888127	0.930616
64.36	1.029073*	0.799484	0.887188	0.941427
64.42	1.029558*	0.794329	0.891139	0.930292
64.45	1.034767*	0.798922	0.890188	0.93536
64.52	1.047533*	0.804506	0.900801	0.932474
64.55	1.040667*	0.800338	0.898618	0.940737
64.6	1.025783*	0.822678	0.898615	0.943613
64.66	1.031199*	0.81622	0.899555	0.937114
64.69	1.039998*	0.818397	0.912246	0.940415
64.75	1.042793*	0.826396	0.919841	0.940733
64.82	1.04*	0.829569	0.919318	0.943293
64.85	1.05554*	0.835697	0.902152	0.945046
64.91	1.044921*	0.843139	0.910989	0.950799
64.93	1.046067*	0.844129	0.920778	0.948613
64.99	1.050136*	0.838423	0.908284	0.955868
65.04	1.048501*	0.859355	0.926394	0.95768
65.1	1.055059*	0.85015	0.924727	0.95042
65.14	1.057842*	0.865579	0.937626	0.95505
65.2	1.052931*	0.861314	0.931797	0.953302
65.23	1.061432*	0.861314	0.92472	0.960488
65.29	1.059795*	0.872922	0.939297	0.95655
65.32	1.055373*	0.872815	0.940958	0.969563
65.38	1.05913*	0.86493	0.940533	0.966307
65.44	1.050318*	0.877617	0.941989	0.961552
65.49	1.047712*	0.875318	0.943336	0.97556
65.55	1.05129*	0.884087	0.948137	0.973814
65.58	1.060943*	0.881335	0.949054	0.96442
65.64	1.075815*	0.881327	0.940213	0.964421
65.67	1.071394*	0.901721	0.943655	0.965922
65.74	1.075483*	0.897895	0.945331	0.974633
65.77	1.066657*	0.893826	0.95915	0.969865
65.83	1.073036*	0.903131	0.945005	0.975623
65.88	1.07516*	0.904987	0.953854	0.979939
65.93	1.072053*	0.907832	0.954778	0.980619
65.96	1.084639*	0.911453	0.96353	0.989329
66.02	1.078428*	0.902244	0.956548	0.986373
66.06	1.068292*	0.911998	0.962275	0.983878
66.12	1.07401*	0.920778	0.970608	0.979252
66.18	1.078438*	0.926442	0.974235	0.986371
66.21	1.071402*	0.916608	0.954264	0.975996
66.27	1.081219*	0.925098	0.967667	0.993869
66.32	1.092655*	0.929638	0.970183	0.99758
66.35	1.087436*	0.932471	0.967579	0.992505
66.41	1.09642*	0.929189	0.962684	0.992878
66.47	1.094949*	0.931575	0.97028	0.987431
66.5	1.085955*	0.931128	0.976926	0.992807
66.56	1.093803*	0.941767	0.97642	0.99538
66.59	1.095438*	0.945048	0.977765	0.994999
66.65	1.078915*	0.938043	0.981725	0.989623
66.71	1.096576*	0.936713	0.975161	0.997118
66.77	1.09642*	0.947802	0.990984	1.00727
66.79	1.100509*	0.936555	0.983825	1.00879
66.85	1.099519*	0.950558	0.990069	1.00371
66.91	1.103777*	0.954275	0.98475	1.00515
66.94	1.100667*	0.957105	0.989228	1.00151
67	1.093142*	0.969176	0.990067	1.00659
67.06	1.091185*	0.963649	1.00075	1.00938
67.09	1.105418*	0.965004	0.993184	1.00476
67.15	1.104765*	0.966346	0.999759	0.995826
67.21	1.106398*	0.965893	0.995787	1.01128
67.24	1.09986*	0.962105	1.00988	1.01425
67.29	1.112933*	0.973405	0.997637	1.00976
67.35	1.107053*	0.973854	0.9963	1.0159
67.38	1.109663*	0.976174	0.998485	1.01483
67.44	1.111298*	0.973858	1.0016	1.02309
67.5	1.115061*	0.978989	1.01002	1.02127
67.53	1.120793*	0.967307	1.00599	1.01953
67.57	1.118172*	0.976166	0.998486	1.01771
67.62	1.122913*	0.976621	1.00598	1.02529
67.67	1.12341*	0.973344	1.02233	1.02423
67.73	1.117185*	0.982715	1.01887	1.02414
67.76	1.123568*	0.984575	0.99941	1.02271
67.82	1.125682*	0.986431	1.01356	1.02702
67.86	1.124053*	0.994331	1.01044	1.02021
67.91	1.127665*	0.98451	1.0188	1.02855
67.97	1.12455*	0.99293	1.01264	1.0249
68.03	1.128807*	0.976168	1.01971	1.03354
68.06	1.129306*	0.9971	1.01306	1.02816
68.11	1.13355*	0.989651	1.02014	1.0368
68.17	1.128156*	1.00545	1.01922	1.02605
68.2	1.149422*	0.98683	1.01569	1.01309
68.26	1.141067*	0.990612	1.02106	1.03459
68.32	1.135679*	1.00082	1.03429	1.03535
68.38	1.142057*	1.00641	1.03076	1.02672
68.41	1.143185*	0.99061	1.0299	1.04178
68.47	1.137797*	1.01385	1.02544	1.04111
68.5	1.139923*	1.00082	1.03783	1.03823
68.55	1.133546*	1.006407*	1.021906*	1.035357*
68.58	1.145318*	1.009226*	1.028134*	1.041781*
68.64	1.146304*	1.011993*	1.039602*	1.043987*
68.69	1.155302*	1.00686*	1.034718*	1.041494*
68.75	1.150915*	1.008669*	1.043508*	1.034388*
68.82	1.154817*	1.019442*	1.025448*	1.041108*
68.85	1.150562*	1.013854*	1.036063*	1.041107*
68.88	1.149564*	1.020397*	1.044056*	1.044654*
68.93	1.153679*	1.016628*	1.043996*	1.043316*
68.99	1.156945*	1.023163*	1.041373*	1.039666*
69.05	1.145172*	1.0129*	1.036913*	1.046193*
69.08	1.152682*	1.017573*	1.051984*	1.042541*
69.14	1.154314*	1.022712*	1.037405*	1.046478*
69.19	1.160694*	1.024566*	1.039183*	1.049353*
69.25	1.155943*	1.020397*	1.047595*	1.044651*
69.28	1.153819*	1.022253*	1.036982*	1.047532*
69.34	1.157927*	1.037113*	1.05285*	1.054831*
69.38	1.151053*	1.034791*	1.038264*	1.051563*
69.43	1.152053*	1.031983*	1.035584*	1.056653*
69.48	1.152684*	1.036203*	1.051989*	1.049734*
69.54	1.160195*	1.039007*	1.052901*	1.056159*
69.57	1.158069*	1.035287*	1.058215*	1.057605*
69.62	1.167203*	1.037641*	1.05338*	1.065074*
69.66	1.169199*	1.035747*	1.058637*	1.057986*
69.72	1.173087*	1.05022*	1.072409*	1.056057*
69.78	1.157438*	1.038518*	1.057731*	1.061639*
69.81	1.164452*	1.03529*	1.051141*	1.059041*
69.86	1.167075*	1.052501*	1.04979*	1.060861*
69.91	1.170694*	1.046427*	1.061696*	1.063458*
69.98	1.163321*	1.04737*	1.059067*	1.06556*
70.04	1.166941*	1.03944*	1.062137*	1.059532*
70.06	1.161694*	1.036658*	1.057736*	1.057314*
70.12	1.162688*	1.041296*	1.063893*	1.062398*
70.18	1.164957*	1.041331*	1.065722*	1.060861*
70.21	1.165949*	1.040384*	1.070118*	1.058751*
70.28	1.180828*	1.049699*	1.070121*	1.061632*
70.3	1.171199*	1.045026*	1.067445*	1.062403*
70.38	1.168574*	1.048288*	1.067011*	1.069212*
70.41	1.175951*	1.058519*	1.066105*	1.069991*
70.47	1.178075*	1.056656*	1.069642*	1.067105*
70.5	1.167444*	1.049207*	1.057253*	1.065664*
70.55	1.180207*	1.052933*	1.067873*	1.080063*
70.59	1.184465*	1.060383*	1.071414*	1.082946*
70.68	1.172698*	1.048261*	1.070506*	1.076519*
70.71	1.17971*	1.048756*	1.069222*	1.071043*
70.76	1.172696*	1.061303*	1.068741*	1.073643*
70.81	1.18283*	1.044076*	1.084241*	1.081892*
70.88	1.181836*	1.061784*	1.078065*	1.07104*
70.91	1.180207*	1.058518*	1.067872*	1.069984*
70.96	1.194722*	1.054375*	1.079882*	1.085321*
70.99	1.17532*	1.067355*	1.076255*	1.076905*
71.05	1.178075*	1.052939*	1.067879*	1.075741*
71.08	1.182828*	1.060847*	1.082472*	1.07757*
71.14	1.183832*	1.059904*	1.079794*	1.078346*
71.2	1.181337*	1.070651*	1.082949*	1.079292*
71.25	1.180207*	1.062253*	1.069649*	1.085819*
71.31	1.177578*	1.067381*	1.078069*	1.078238*
71.34	1.190844*	1.071564*	1.080273*	1.090141*
71.39	1.18759*	1.063166*	1.077593*	1.082277*
71.45	1.18446*	1.062248*	1.085579*	1.081504*
71.52	1.1717*	1.062255*	1.071427*	1.080061*
71.55	1.190846*	1.067848*	1.082045*	1.078624*
71.57	1.188095*	1.067364*	1.083345*	1.084108*
71.63	1.186966*	1.058969*	1.082436*	1.093525*
71.71	1.180079*	1.062227*	1.087316*	1.081603*
71.74	1.179582*	1.063636*	1.088655*	1.078343*
71.8	1.186594*	1.062261*	1.092669*	1.08438*
71.86	1.182838*	1.068314*	1.0754*	1.08189*
71.89	1.196103*	1.053863*	1.077609*	1.088038*
71.95	1.191844*	1.065043*	1.097078*	1.083714*
71.97	1.200978*	1.067392*	1.097546*	1.07823*
72.03	1.175961*	1.060409*	1.085595*	1.093024*
72.07	1.184836*	1.077606*	1.084226*	1.096411*
72.12	1.196611*	1.076686*	1.086899*	1.084111*
72.17	1.196108*	1.079956*	1.088237*	1.089482*
72.23	1.19711*	1.06597*	1.096183*	1.091694*
72.26	1.190219*	1.067372*	1.101061*	1.091307*
72.32	1.198237*	1.063192*	1.093548*	1.086602*
72.38	1.183341*	1.072501*	1.100633*	1.088037*
72.44	1.197107*	1.067832*	1.101492*	1.085929*
72.47	1.192349*	1.06924*	1.097523*	1.088424*
72.53	1.184351*	1.075294*	1.099723*	1.088814*
72.57	1.192856*	1.069697*	1.094418*	1.08737*
72.63	1.181852*	1.061815*	1.094025*	1.085434*
72.67	1.176966*	1.061327*	1.100635*	1.085154*
72.72	1.180724*	1.062734*	1.089584*	1.09773*
72.75	1.186479*	1.071571*	1.090882*	1.090253*
72.84	1.189736*	1.070649*	1.088248*	1.090917*
72.87	1.186606*	1.056701*	1.108627*	1.087266*
72.9	1.180726*	1.060882*	1.096676*	1.087653*
72.96*	1.181223*	1.078107*	1.0794*	1.09524*
73.01*	1.19286*	1.075296*	1.108595*	1.096017*
73.07*	1.183848*	1.069251*	1.101081*	1.098508*
73.1*	1.189103*	1.068303*	1.094864*	1.094967*
73.15*	1.184978*	1.075786*	1.091365*	1.09773*
73.21*	1.176473*	1.060885*	1.096676*	1.093407*
73.24*	1.174844*	1.066939*	1.102421*	1.100999*
73.31*	1.183355*	1.063211*	1.098886*	1.090922*
73.33*	1.178598*	1.070201*	1.100213*	1.097728*
73.39*	1.174345*	1.059031*	1.103765*	1.094852*
73.44*	1.183984*	1.06556*	1.09936*	1.094074*
73.5*	1.192876*	1.065994*	1.105061*	1.090253*
73.56*	1.169963*	1.060863*	1.101964*	1.094966*
73.59*	1.194*	1.063213*	1.100664*	1.086603*
73.65*	1.173353*	1.063708*	1.099369*	1.092637*
73.7*	1.170604*	1.063224*	1.093584*	1.092364*
73.73*	1.180369*	1.05861*	1.10515*	1.097225*
73.79*	1.174363*	1.062765*	1.096696*	1.090535*
73.86*	1.177477*	1.059959*	1.097568*	1.085553*
73.87*	1.18612*	1.061858*	1.106454*	1.086881*
73.93*	1.176487*	1.068366*	1.094937*	1.083337*
73.99*	1.175355*	1.052516*	1.092259*	1.091312*
74.02*	1.183363*	1.055782*	1.097137*	1.095239*
74.07*	1.18487*	1.059022*	1.093127*	1.09209*
74.13*	1.174363*	1.06464*	1.096709*	1.096289*
74.2*	1.169602*	1.060457*	1.094505*	1.091589*
74.23*	1.182874*	1.059054*	1.109107*	1.090536*
74.28*	1.171607*	1.064163*	1.099785*	1.094583*
74.33*	1.184996*	1.055331*	1.089633*	1.090536*
74.39*	1.172738*	1.063244*	1.102459*	1.093804*
74.45*	1.184*	1.050697*	1.092315*	1.096959*
74.48*	1.181878*	1.041394*	1.092316*	1.088321*
74.54*	1.184503*	1.056747*	1.092754*	1.080074*
74.57*	1.165227*	1.052983*	1.106879*	1.085946*
74.63*	1.183878*	1.058124*	1.101141*	1.085558*
74.68*	1.165361*	1.045584*	1.092761*	1.08439*
74.71*	1.179746*	1.039536*	1.08879*	1.092644*
74.77*	1.168489*	1.044632*	1.079468*	1.080851*
74.82*	1.161108*	1.045579*	1.098078*	1.075754*
74.88*	1.181878*	1.048856*	1.094101*	1.085445*
74.91*	1.183383*	1.046497*	1.10072*	1.079411*
74.97*	1.172748*	1.050218*	1.090094*	1.080851*
75.02*	1.179134*	1.044641*	1.090098*	1.085169*
75.06*	1.169621*	1.049316*	1.076848*	1.078639*
75.12*	1.164872*	1.056309*	1.094116*	1.07825*
75.18*	1.16488*	1.050721*	1.07996*	1.088329*
75.19*	1.164247*	1.044654*	1.086575*	1.069337*
75.25*	1.176639*	1.046089*	1.095029*	1.086118*
75.31*	1.170757*	1.03351*	1.093696*	1.076431*
75.35*	1.162249*	1.042828*	1.075998*	1.074983*
75.4*	1.165874*	1.034882*	1.091456*	1.084792*
75.46*	1.165377*	1.04002*	1.085718*	1.078643*
75.49*	1.166513*	1.0298*	1.086629*	1.074993*
75.55*	1.168142*	1.023762*	1.087964*	1.076043*
75.6*	1.160132*	1.039107*	1.088398*	1.087947*
75.63*	1.161126*	1.036303*	1.089264*	1.065686*
75.69*	1.171268*	1.030264*	1.071137*	1.082578*
75.74*	1.156381*	1.026536*	1.10477*	1.078265*
75.8*	1.160132*	1.027945*	1.081327*	1.077869*
75.83*	1.151491*	1.033503*	1.079519*	1.069339*
75.89*	1.169146*	1.020965*	1.08708*	1.078263*
75.93*	1.162767*	1.030274*	1.080005*	1.073937*
75.98*	1.155389*	1.020052*	1.080908*	1.063092*
76.04*	1.162268*	1.029819*	1.072494*	1.076438*
76.07*	1.152633*	1.013972*	1.08398*	1.07001*
76.14*	1.151503*	1.01861*	1.08485*	1.067905*
76.2*	1.159657*	1.014484*	1.077385*	1.067415*
76.24*	1.160016*	1.013033*	1.074239*	1.066468*
76.29*	1.156893*	1.021434*	1.087533*	1.070016*
76.32*	1.143639*	1.009815*	1.074723*	1.065313*
76.38*	1.155398*	1.005177*	1.073855*	1.063095*
76.44*	1.147892*	0.99305*	1.072948*	1.066748*
76.47*	1.159659*	1.001462*	1.075635*	1.055905*
76.52*	1.136761*	1.005641*	1.060143*	1.062048*
76.58*	1.151787*	1.001967*	1.065497*	1.056186*
76.64*	1.155905*	0.99261*	1.070763*	1.062051*
76.67*	1.148536*	0.995425*	1.066365*	1.061276*
76.72*	1.137909*	0.98612*	1.07698*	1.065599*
76.78*	1.139884*	0.989793*	1.080481*	1.065703*
76.81*	1.149032*	1.00334*	1.079184*	1.061663*
76.85*	1.150667*	0.987993*	1.069913*	1.064156*
76.93*	1.154919*	1.002893*	1.069911*	1.058397*
76.96*	1.143158*	0.990763*	1.067242*	1.050538*
77.01*	1.144286*	0.989865*	1.066385*	1.04977*
77.06*	1.134154*	0.981004*	1.063278*	1.051595*
77.13*	1.142669*	0.986597*	1.045588*	1.055913*
77.16*	1.141673*	0.981972*	1.067738*	1.049391*
77.22*	1.144294*	0.986153*	1.066403*	1.048339*
77.24*	1.145929*	0.983845*	1.051817*	1.059467*
77.3*	1.127639*	0.980963*	1.065018*	1.053142*
77.36*	1.128923*	0.972682*	1.065982*	1.050836*
77.42*	1.155426*	0.964268*	1.052685*	1.044401*
77.44*	1.137923*	0.974998*	1.045188*	1.051223*
77.5*	1.136292*	0.954963*	1.052694*	1.045848*
77.56*	1.121903*	0.95914*	1.058434*	1.049111*
77.59*	1.14055*	0.975449*	1.043848*	1.045849*
77.64*	1.136298*	0.971736*	1.065085*	1.058802*
77.71*	1.146302*	0.954453*	1.053989*	1.039802*
77.74*	1.134174*	0.95871*	1.054477*	1.050169*
77.8*	1.1363*	0.953122*	1.052711*	1.047293*
77.84*	1.12829*	0.961018*	1.049602*	1.037602*
77.9*	1.124387*	0.957677*	1.049987*	1.036647*
77.93*	1.123402*	0.9512*	1.050893*	1.043074*
78*	1.131913*	0.938165*	1.04736*	1.037314*
78.05*	1.127805*	0.945688*	1.043879*	1.035785*
78.08*	1.124053*	0.955449*	1.047852*	1.040488*
78.14*	1.126671*	0.937274*	1.039439*	1.039431*
78.2*	1.122422*	0.931695*	1.041217*	1.037999*
78.25*	1.115205*	0.921582*	1.022731*	1.037135*
78.28*	1.118172*	0.946606*	1.03768*	1.040878*
78.34*	1.126675*	0.935434*	1.037678*	1.037991*
78.37*	1.133205*	0.93178*	1.032439*	1.030711*
78.42*	1.124556*	0.922397*	1.035924*	1.036563*
78.48*	1.125049*	0.922845*	1.029273*	1.026866*
78.51*	1.118331*	0.92249*	1.028915*	1.030716*
78.57*	1.120945*	0.919214*	1.039953*	1.032536*
78.6*	1.123578*	0.9178*	1.020922*	1.022844*
78.69*	1.108848*	0.919745*	1.033376*	1.028508*
78.72*	1.11131*	0.918248*	1.030204*	1.030427*
78.77*	1.113446*	0.916396*	1.031978*	1.024667*
78.83*	1.108203*	0.902477*	1.016975*	1.022461*
78.88*	1.108207*	0.909922*	1.027593*	1.026782*
78.92*	1.102329*	0.90851*	1.029792*	1.022851*
78.95*	1.103314*	0.896372*	1.011183*	1.013542*
79.01*	1.096438*	0.9071*	1.012535*	1.023238*
79.06*	1.104781*	0.890251*	1.010698*	1.017566*
79.12*	1.098897*	0.89815*	1.02706*	1.025149*
79.15*	1.090059*	0.897804*	1.021394*	1.018923*
79.21*	1.097923*	0.884231*	1.020899*	1.014306*
79.26*	1.098416*	0.888407*	1.008946*	1.019016*
79.32*	1.095797*	0.884235*	1.019143*	1.00999*
79.35*	1.088929*	0.887527*	1.006327*	1.01825*
79.41*	1.09744*	0.878214*	1.002797*	1.011054*
79.44*	1.078787*	0.873072*	1.006763*	1.015754*
79.5*	1.093517*	0.871116*	1.015553*	1.00432*
79.56*	1.0783*	0.859601*	1.006347*	1.000973*
79.59*	1.084684*	0.878233*	1.013427*	0.999536*
79.67*	1.073394*	0.868386*	1.005866*	1.005011*
79.69*	1.062931*	0.874085*	0.997092*	1.004926*
79.75*	1.069803*	0.859623*	1.001061*	1.003869*
79.79*	1.079292*	0.858647*	1.005448*	1.004627*
79.85*	1.061789*	0.848895*	0.990868*	0.99705*
79.9*	1.072923*	0.838155*	0.985987*	0.98159*
79.93*	1.063434*	0.84288*	0.990463*	0.998114*
80.02*	1.064418*	0.832584*	0.982458*	0.995994*
80.02*	1.062949*	0.833133*	0.977655*	0.987659*
80.07*	1.062951*	0.836871*	0.991819*	0.996299*
80.13*	1.058708*	0.831287*	0.988278*	0.996296*
80.19*	1.052629*	0.829743*	0.974459*	0.99676*
80.22*	1.043637*	0.831177*	0.984676*	0.984866*
80.28*	1.055428*	0.822854*	0.97498*	0.984104*
80.33*	1.042002*	0.818575*	0.983331*	0.976599*
80.39*	1.03726*	0.814421*	0.972293*	0.984866*
80.43*	1.049367*	0.817603*	0.971785*	0.977354*
80.46*	1.042684*	0.822867*	0.966143*	0.984105*
80.51*	1.035625*	0.805553*	0.960335*	0.979488*
80.59*	1.051505*	0.812009*	0.966483*	0.974479*
80.62*	1.049375*	0.802695*	0.962951*	0.980242*
80.68*	1.018617*	0.798116*	0.963888*	0.963651*
80.72*	1.027126*	0.798118*	0.956814*	0.969415*
80.75*	1.048892*	0.791094*	0.957235*	0.972674*
80.83*	1.022884*	0.792542*	0.962136*	0.96798*
80.89*	1.037286*	0.790244*	0.952868*	0.95896*
80.92*	1.014371*	0.785094*	0.951521*	0.965102*
80.97*	1.016499*	0.783237*	0.942671*	0.96366*
81.01*	1.018148*	0.769771*	0.952881*	0.963284*
81.06*	1.016696*	0.768479*	0.944546*	0.965041*
81.12*	1.024053*	0.767482*	0.943617*	0.961472*
81.18*	1.011769*	0.767917*	0.93696*	0.953208*
81.21*	1.00443*	0.752166*	0.943217*	0.946704*
81.26*	1.012751*	0.753887*	0.93958*	0.952528*
81.29*	1.008686*	0.752168*	0.944984*	0.951026*
81.33*	1.006367*	0.753891*	0.932506*	0.951087*
81.38*	1.005888*	0.749739*	0.937401*	0.939192*
81.44*	0.990032*	0.737715*	0.929494*	0.947088*
81.5*	0.999034*	0.730689*	0.921067*	0.946027*
81.55*	0.985097*	0.735281*	0.927217*	0.946778*
81.59*	0.978448*	0.720116*	0.916293*	0.939152*
81.65*	0.987917*	0.726558*	0.927749*	0.935579*
81.68*	0.979625*	0.719281*	0.910163*	0.938407*
81.74*	0.981059*	0.716826*	0.913175*	0.938085*
81.79*	0.971872*	0.697612*	0.919749*	0.929131*
81.84*	0.966183*	0.707525*	0.911418*	0.928013*
81.91*	0.973053*	0.693052*	0.901226*	0.938472*
81.94*	0.966189*	0.694497*	0.897273*	0.928018*
82*	0.948694*	0.690351*	0.902174*	0.921889*
82.05*	0.962152*	0.694677*	0.908011*	0.920771*
82.08*	0.964546*	0.693074*	0.890622*	0.919757*
82.14*	0.952485*	0.686224*	0.88408*	0.925841*
82.17*	0.945408*	0.680044*	0.895942*	0.921206*
82.24*	0.946582*	0.669893*	0.900434*	0.90174*
82.29*	0.931481*	0.675312*	0.886161*	0.907549*
82.34*	0.93313*	0.667444*	0.887523*	0.915819*
82.4*	0.928402*	0.652122*	0.881807*	0.911132*
82.43*	0.936444*	0.659155*	0.884931*	0.912199*
82.49*	0.918249*	0.652555*	0.869844*	0.905752*
82.53*	0.921558*	0.646135*	0.872557*	0.905014*
82.58*	0.919913*	0.640967*	0.867664*	0.905384*
82.64*	0.924168*	0.637251*	0.86413*	0.892421*
82.7*	0.920858*	0.643678*	0.870275*	0.896048*
82.72*	0.90597*	0.619464*	0.850799*	0.891728*
82.78*	0.905986*	0.632516*	0.847264*	0.893175*
82.82*	0.904329*	0.614299*	0.84945*	0.884905*
82.87*	0.902677*	0.611002*	0.855183*	0.880952*
82.93*	0.892755*	0.600445*	0.853958*	0.888489*
82.96*	0.887787*	0.603551*	0.849884*	0.866548*
83.02*	0.879274*	0.59424*	0.846344*	0.883836*
83.05*	0.877874*	0.585558*	0.836271*	0.871213*
83.12*	0.882848*	0.582466*	0.845675*	0.875875*
83.17*	0.873158*	0.585155*	0.830564*	0.865094*
83.22*	0.868179*	0.580808*	0.840646*	0.861872*
83.25*	0.862272*	0.568183*	0.832208*	0.860805*
83.31*	0.865122*	0.561372*	0.820373*	0.861149*
83.37*	0.849503*	0.570068*	0.830452*	0.856488*
83.41*	0.858026*	0.549569*	0.810976*	0.855046*
83.47*	0.854247*	0.561161*	0.822018*	0.85398*
83.52*	0.845732*	0.549985*	0.813168*	0.859747*
83.55*	0.832968*	0.548139*	0.807866*	0.849669*
83.6*	0.844081*	0.535505*	0.808273*	0.845714*
83.66*	0.841024*	0.532823*	0.807468*	0.84642*
83.69*	0.83983*	0.528065*	0.801206*	0.839954*
83.76*	0.824471*	0.518342*	0.793725*	0.842475*
83.82*	0.820217*	0.507161*	0.786642*	0.833829*
83.84*	0.820959*	0.500366*	0.787204*	0.829863*
83.9*	0.82143*	0.500773*	0.776996*	0.83167*
83.96*	0.813842*	0.492272*	0.774262*	0.826636*
83.99*	0.808391*	0.496821*	0.787477*	0.820156*
84.05*	0.807004*	0.490018*	0.773875*	0.816195*
84.08*	0.793781*	0.489632*	0.766398*	0.814397*
84.14*	0.79758*	0.481778*	0.757152*	0.80828*
84.2*	0.784809*	0.45756*	0.764242*	0.803956*
84.25*	0.786949*	0.468747*	0.748309*	0.80396*
84.31*	0.781947*	0.455048*	0.747747*	0.802165*
84.35*	0.77816*	0.447994*	0.760555*	0.793888*
84.38*	0.773446*	0.451338*	0.751306*	0.787765*
84.44*	0.756254*	0.441898*	0.733382*	0.783094*
84.47*	0.74912*	0.431913*	0.736353*	0.788499*
84.52*	0.753391*	0.437516*	0.738127*	0.782734*
84.58*	0.743661*	0.434586*	0.737163*	0.782017*
84.63*	0.741548*	0.412229*	0.728313*	0.776259*
84.7*	0.733491*	0.410767*	0.726951*	0.778064*
84.73*	0.739882*	0.410774*	0.709239*	0.770865*
84.79*	0.731834*	0.399996*	0.713193*	0.769781*
84.82*	0.72027*	0.393617*	0.708863*	0.758983*
84.88*	0.710862*	0.38166*	0.699228*	0.759713*
84.93*	0.705846*	0.373529*	0.703958*	0.756464*
84.97*	0.696432*	0.367163*	0.694318*	0.752873*
85.03*	0.704951*	0.363442*	0.70319*	0.748556*
85.08*	0.688375*	0.365702*	0.696503*	0.747474*
85.11*	0.697799*	0.3609*	0.677816*	0.743866*
85.17*	0.686256*	0.358264*	0.685893*	0.734515*
85.23*	0.675949*	0.339939*	0.682557*	0.737427*
85.27*	0.669692*	0.358673*	0.679217*	0.731997*
85.33*	0.672158*	0.317993*	0.670577*	0.73059*
85.36*	0.653006*	0.336628*	0.674114*	0.726266*
85.41*	0.656043*	0.313183*	0.657197*	0.719774*
85.44*	0.633085*	0.313584*	0.65583*	0.720135*
85.53*	0.639811*	0.30459*	0.656045*	0.7144*
85.56*	0.617304*	0.29605*	0.655067*	0.705031*
85.62*	0.625822*	0.279287*	0.647989*	0.706474*
85.65*	0.613503*	0.296455*	0.637765*	0.705384*
85.71*	0.623698*	0.269982*	0.635606*	0.694953*
85.77*	0.608724*	0.271811*	0.633675*	0.691772*
85.82*	0.589667*	0.262551*	0.621454*	0.684879*
85.85*	0.604919*	0.264756*	0.628767*	0.676283*
85.92*	0.572134*	0.252835*	0.60853*	0.678469*
85.95*	0.576036*	0.246906*	0.599468*	0.669797*
86.01*	0.579051*	0.232763*	0.607324*	0.660405*
86.07*	0.555649*	0.221595*	0.594937*	0.664734*
86.1*	0.559469*	0.22495*	0.591016*	0.66727*
86.16*	0.551406*	0.214161*	0.582561*	0.65322*
86.19*	0.540706*	0.214144*	0.582421*	0.652932*
86.25*	0.536899*	0.205222*	0.573957*	0.647519*
86.3*	0.527138*	0.192933*	0.576501*	0.652536*
86.36*	0.530584*	0.19407*	0.57589*	0.640616*
86.39*	0.520331*	0.186994*	0.567286*	0.64068*
86.45*	0.513566*	0.177309*	0.56351*	0.631984*
86.49*	0.510572*	0.159802*	0.555671*	0.634178*
86.52*	0.504592*	0.16205*	0.545304*	0.629922*
86.61*	0.488872*	0.157582*	0.557072*	0.622319*
86.64*	0.485917*	0.143797*	0.547604*	0.616156*
86.7*	0.483801*	0.132625*	0.52813*	0.60175*
86.75*	0.470172*	0.137488*	0.527387*	0.603953*
86.78*	0.460406*	0.125189*	0.528145*	0.601757*
86.85*	0.448905*	0.117015*	0.525633*	0.598201*
86.88*	0.443815*	0.108793*	0.519696*	0.604996*
86.94*	0.443394*	0.100983*	0.505152*	0.590248*
86.97*	0.43787*	0.105453*	0.502369*	0.586609*
87.03*	0.434036*	0.085364*	0.497335*	0.575168*
87.09*	0.422132*	0.089832*	0.489237*	0.577294*
87.13*	0.42086*	0.075654*	0.48645*	0.566451*
87.18*	0.405536*	0.054799*	0.487857*	0.573321*
87.23*	0.405974*	0.060762*	0.477611*	0.562138*
87.26*	0.389379*	0.061179*	0.472584*	0.553583*
87.32*	0.3847*	0.044006*	0.467005*	0.552061*
87.38*	0.369807*	0.040287*	0.467016*	0.546299*
87.42*	0.366394*	0.031686*	0.464224*	0.542654*
87.48*	0.360012*	0.018647*	0.444747*	0.535459*
87.51*	0.34085*	0.013059*	0.455378*	0.528249*
87.57*	0.340028*	0.006767*	0.44225*	0.530471*
87.62*	0.34045*	0.003396*	0.426684*	0.519277*
87.68*	0.342623*	-0.01141*	0.426629*	0.510418*
87.71*	0.325564*	-0.01522*	0.424931*	0.516413*
87.78*	0.301793*	-0.02293*	0.424499*	0.508651*
87.81*	0.300085*	-0.02816*	0.416025*	0.501792*
87.87*	0.286024*	-0.03117*	0.402608*	0.496697*
87.93*	0.28816*	-0.04794*	0.400843*	0.489494*
87.96*	0.283909*	-0.04793*	0.391991*	0.498142*
88.02*	0.266888*	-0.06469*	0.390233*	0.473659*
88.05*	0.262635*	-0.06281*	0.379617*	0.47943*
88.11*	0.258874*	-0.06794*	0.388794*	0.472356*
88.14*	0.258396*	-0.08143*	0.376085*	0.465028*
88.2*	0.244819*	-0.08957*	0.366519*	0.452858*
88.23*	0.221822*	-0.10599*	0.359812*	0.444546*
88.29*	0.232065*	-0.1026*	0.350599*	0.448548*
88.36*	0.218897*	-0.11597*	0.352022*	0.445344*
88.39*	0.204416*	-0.11935*	0.339996*	0.431275*
88.45*	0.194592*	-0.12797*	0.337183*	0.429047*
88.5*	0.180217*	-0.1312*	0.318047*	0.432071*
88.53*	0.181034*	-0.14541*	0.320542*	0.421206*
88.59*	0.172809*	-0.15826*	0.303213*	0.414508*
88.65*	0.173331*	-0.15589*	0.310655*	0.406013*
88.69*	0.160576*	-0.15774*	0.308895*	0.401698*
88.75*	0.140227*	-0.16621*	0.295441*	0.394979*
88.78*	0.13585*	-0.185*	0.288369*	0.395151*
88.84*	0.124412*	-0.18939*	0.282356*	0.390186*
88.88*	0.113531*	-0.20445*	0.271392*	0.383952*
88.93*	0.109128*	-0.20649*	0.26785*	0.372592*
89*	0.104091*	-0.2146*	0.267156*	0.371957*
89.03*	0.095191*	-0.22238*	0.259734*	0.365888*
89.09*	0.086296*	-0.23388*	0.241691*	0.351175*
89.12*	0.079927*	-0.23946*	0.239928*	0.348297*
89.18*	0.0633*	-0.25402*	0.242058*	0.335659*
89.24*	0.052677*	-0.25402*	0.22613*	0.337107*
89.27*	0.047649*	-0.26771*	0.223673*	0.332158*
89.31*	0.037406*	-0.27668*	0.211644*	0.326725*
89.39*	0.024649*	-0.29158*	0.20811*	0.320966*
89.42*	0.006677*	-0.29057*	0.205629*	0.310393*
89.48*	0.015765*	-0.29747*	0.188313*	0.304824*
89.51*	-0.00936*	-0.31017*	0.19221*	0.29794*
89.57*	-0.01246*	-0.32596*	0.173785*	0.287364*
89.6*	-0.01824*	-0.32165*	0.175955*	0.291886*
89.67*	-0.02598*	-0.32659*	0.162488*	0.282434*
89.73*	-0.03082*	-0.33274*	0.162092*	0.289442*
89.76*	-0.04685*	-0.33928*	0.150461*	0.266913*
89.82*	-0.04609*	-0.35913*	0.160002*	0.263213*
89.88*	-0.06698*	-0.36811*	0.142647*	0.250563*
89.91*	-0.07312*	-0.37902*	0.13387*	0.251908*
89.98*	-0.08011*	-0.3796*	0.126389*	0.248829*
90.01*	-0.09287*	-0.38704*	0.124629*	0.23875*
90.07*	-0.09174*	-0.40658*	0.116797*	0.22959*
90.1*	-0.11414*	-0.41311*	0.103394*	0.224351*
90.16*	-0.11702*	-0.40256*	0.100955*	0.229506*
90.22*	-0.12227*	-0.42582*	0.096667*	0.203058*
90.25*	-0.13039*	-0.44041*	0.084617*	0.204811*
90.31*	-0.14214*	-0.4432*	0.076533*	0.198145*
90.34*	-0.16628*	-0.45313*	0.077649*	0.19467*
90.41*	-0.17941*	-0.46648*	0.072014*	0.194373*
90.47*	-0.18329*	-0.47361*	0.058193*	0.177397*
90.5*	-0.19605*	-0.46987*	0.047579*	0.18604*
90.56*	-0.19465*	-0.47979*	0.034537*	0.165289*
90.6*	-0.20521*	-0.49284*	0.036533*	0.152686*
90.66*	-0.21584*	-0.50774*	0.038313*	0.151253*
90.68*	-0.22331*	-0.5012*	0.024935*	0.147484*
90.74*	-0.23784*	-0.51206*	0.023505*	0.147789*
90.8*	-0.24421*	-0.52509*	0.009354*	0.126189*
90.84*	-0.26087*	-0.53969*	0.009687*	0.129367*
90.91*	-0.26057*	-0.53929*	-0.00629*	0.11461*
90.94*	-0.27044*	-0.54803*	-0.01429*	0.108337*
91*	-0.27894*	-0.55174*	-0.01605*	0.105458*
91.03*	-0.28957*	-0.56292*	-0.0249*	0.099701*
91.09*	-0.30871*	-0.57222*	-0.03374*	0.101149*
91.14*	-0.30834*	-0.57378*	-0.04226*	0.088485*
91.17*	-0.31827*	-0.60298*	-0.054*	0.089071*
91.24*	-0.33528*	-0.60112*	-0.04513*	0.078996*
91.28*	-0.34805*	-0.60483*	-0.06815*	0.0646*
91.34*	-0.34804*	-0.61227*	-0.0646*	0.064605*
91.4*	-0.3594*	-0.6148*	-0.07216*	0.062885*
91.43*	-0.37249*	-0.62991*	-0.09032*	0.047908*
91.46*	-0.37959*	-0.64736*	-0.09434*	0.043304*
91.52*	-0.40299*	-0.64549*	-0.09434*	0.034667*
91.59*	-0.39764*	-0.65942*	-0.10768*	0.029486*
91.62*	-0.41183*	-0.66256*	-0.11412*	0.01422*
91.68*	-0.42*	-0.67158*	-0.12442*	0.024599*
91.74*	-0.44553*	-0.6809*	-0.12087*	0.005875*
91.77*	-0.44944*	-0.68433*	-0.13648*	-0.0068*
91.83*	-0.4622*	-0.69364*	-0.13824*	-0.00247*
91.87*	-0.45581*	-0.71227*	-0.14886*	-0.00967*
91.91*	-0.4856*	-0.71972*	-0.15594*	-0.01976*
91.97*	-0.48201*	-0.72214*	-0.16717*	-0.02174*
92.02*	-0.49724*	-0.73733*	-0.16925*	-0.02923*
92.08*	-0.50685*	-0.74764*	-0.1807*	-0.04278*
92.11*	-0.51626*	-0.74273*	-0.18702*	-0.04961*
92.18*	-0.52634*	-0.75536*	-0.19694*	-0.05026*
92.22*	-0.53237*	-0.76624*	-0.20193*	-0.05573*
92.25*	-0.54827*	-0.78012*	-0.20638*	-0.06376*
92.31*	-0.55644*	-0.77797*	-0.22024*	-0.075*
92.37*	-0.56069*	-0.80405*	-0.22377*	-0.08364*
92.43*	-0.57983*	-0.80963*	-0.23792*	-0.09804*
92.46*	-0.58342*	-0.81466*	-0.23023*	-0.09605*
92.49*	-0.59799*	-0.81437*	-0.24408*	-0.10009*
92.56*	-0.60978*	-0.82285*	-0.25379*	-0.10214*
92.62*	-0.6245*	-0.83195*	-0.25737*	-0.11243*
92.65*	-0.63202*	-0.8423*	-0.26885*	-0.11159*
92.72*	-0.64544*	-0.84843*	-0.2783*	-0.12799*
92.75*	-0.66085*	-0.8601*	-0.28033*	-0.13383*
92.81*	-0.66*	-0.87237*	-0.29746*	-0.14355*
92.85*	-0.67277*	-0.88355*	-0.30276*	-0.15075*
92.9*	-0.67702*	-0.89658*	-0.29922*	-0.15075*
92.94*	-0.69861*	-0.89311*	-0.30836*	-0.15965*
93*	-0.70711*	-0.89683*	-0.32252*	-0.17117*
93.06*	-0.71073*	-0.91306*	-0.33609*	-0.17639*
93.09*	-0.72656*	-0.91385*	-0.33519*	-0.18727*
93.16*	-0.74296*	-0.92077*	-0.34345*	-0.18529*
93.2*	-0.74933*	-0.94312*	-0.35406*	-0.20257*
93.23*	-0.75634*	-0.94178*	-0.3635*	-0.20309*
93.29*	-0.75446*	-0.95323*	-0.36882*	-0.21592*
93.34*	-0.76696*	-0.96226*	-0.36702*	-0.21172*
93.41*	-0.77729*	-0.96758*	-0.3862*	-0.2201*
93.44*	-0.80011*	-0.98378*	-0.37702*	-0.23004*
93.47*	-0.808*	-0.98326*	-0.3906*	-0.22952*
93.54*	-0.81314*	-0.99898*	-0.41422*	-0.25152*
93.61*	-0.83624*	-1.01363*	-0.42101*	-0.24549*
93.61*	-0.83744*	-1.01464*	-0.42392*	-0.2638*
93.67*	-0.84991*	-1.0181*	-0.43602*	-0.25778*
93.73*	-0.85233*	-1.02954*	-0.42036*	-0.27388*
93.79*	-0.86874*	-1.03647*	-0.45166*	-0.26903*
93.83*	-0.87512*	-1.04019*	-0.44988*	-0.28632*
93.86*	-0.88485*	-1.0506*	-0.45433*	-0.28554*
93.92*	-0.90065*	-1.06627*	-0.46403*	-0.28775*
93.99*	-0.9137*	-1.07209*	-0.47669*	-0.3096*
94.02*	-0.90791*	-1.06701*	-0.47725*	-0.30434*
94.05*	-0.92037*	-1.08164*	-0.48581*	-0.30408*
94.12*	-0.94377*	-1.09282*	-0.4982*	-0.31992*
94.16*	-0.94258*	-1.09927*	-0.49708*	-0.32323*
94.22*	-0.96291*	-1.10025*	-0.5035*	-0.33143*
94.24*	-0.97567*	-1.11329*	-0.51765*	-0.33431*
94.31*	-0.98272*	-1.12323*	-0.51095*	-0.3489*
94.37*	-0.99364*	-1.14025*	-0.5307*	-0.35347*
94.4*	-0.99084*	-1.1396*	-0.53383*	-0.36046*
94.46*	-1.01492*	-1.14582*	-0.53422*	-0.35922*
94.51*	-1.02613*	-1.15002*	-0.54893*	-0.36259*
94.54*	-1.02682*	-1.16185*	-0.54579*	-0.37143*
94.6*	-1.03945*	-1.17845*	-0.56186*	-0.38756*
94.67*	-1.04398*	-1.18241*	-0.5692*	-0.38492*
94.69*	-1.06625*	-1.18516*	-0.58936*	-0.39833*
94.79*	-1.06441*	-1.19099*	-0.58608*	-0.40578*
94.83*	-1.08013*	-1.20101*	-0.59574*	-0.4065*
94.86*	-1.08354*	-1.20961*	-0.59669*	-0.40865*

## Sheet: Figure 2B - Cdc20-Apcin Tm
	Extracted Cdc20 melting temperatures with Apcin from technical triplicates
	0 μM			25 μM			50 μM			100 μM
Apcin	53.57	53.57	53.57	57.99	57.91	57.91	59.55	59.47	59.29	60.86	61.12	60.94

## Sheet: Figure 2C - Apcin4-1 sensorgram
	[Apcin] M
Time (sec)	1.56e-007	3.13e-007	6.25e-007	1.25e-006	2.5e-006	5e-006	1e-005		Note: Data in blue and with an Asterix is excluded in the figure
-56.9	-0.243652	-0.13916	-0.398438	-0.0454102	-0.253418	-0.12207	-0.162598
-56.8	-0.157715	-0.0805664	-0.320313	-0.00634766	-0.19873	-0.165039	-0.10791
-56.7	-0.114746	-0.00634766	-0.289063	0.0170898	-0.163574	-0.110352	-0.0454102
-56.6	-0.0952148	0.00927734	-0.269531	0.0522461	-0.116699	-0.12207	-0.0258789
-56.5	-0.126465	-0.0102539	-0.277344	0.0366211	-0.116699	-0.141602	-0.0258789
-56.4	-0.103027	0.0131836	-0.296875	0.0249023	-0.0932617	-0.141602	-0.0258789
-56.3	-0.134277	0.00146484	-0.328125	0.0170898	-0.124512	-0.149414	-0.0336914
-56.2	-0.138184	-0.0102539	-0.339844	0.0249023	-0.13623	-0.165039	-0.0375977
-56.1	-0.134277	0.00146484	-0.347656	0.0249023	-0.13623	-0.161133	-0.0454102
-56	-0.134277	0.00146484	-0.339844	0.0444336	-0.13623	-0.161133	-0.0454102
-55.9	-0.134277	0.00146484	-0.335938	0.0444336	-0.155762	-0.168945	-0.0649414
-55.8	-0.176758	-0.00634766	-0.359375	0.0366211	-0.178711	-0.178711	-0.0883789
-55.7	-0.36084	-0.0283203	-0.408691	0.0117188	-0.313477	-0.172852	-0.192383
-55.6	-0.410156	-0.0805664	-0.460938	-0.0126953	-0.340332	-0.180664	-0.24707
-55.5	-0.39502	-0.0805664	-0.460938	-0.00634766	-0.366699	-0.168945	-0.246094
-55.4	-0.34668	-0.0522461	-0.431152	0.03125	-0.320313	-0.127441	-0.17334
-55.3	-0.377441	-0.065918	-0.443848	0.0263672	-0.328613	-0.15332	-0.168945
-55.2	-0.393555	-0.0703125	-0.438965	0.0249023	-0.347168	-0.168945	-0.160156
-55.1	-0.395996	-0.0883789	-0.435059	0.015625	-0.381348	-0.16748	-0.172852
-55	-0.376465	-0.0961914	-0.436035	0.0380859	-0.352051	-0.161133	-0.164063
-54.9	-0.389648	-0.0859375	-0.424805	0.0454102	-0.35791	-0.158691	-0.154785
-54.8	-0.36084	-0.0805664	-0.394531	0.0600586	-0.361328	-0.149414	-0.160156
-54.7	-0.377441	-0.100098	-0.416504	0.043457	-0.356445	-0.172852	-0.163574
-54.6	-0.397461	-0.115723	-0.403809	0.0429688	-0.366699	-0.188477	-0.175781
-54.5	-0.415527	-0.146973	-0.40625	0.0390625	-0.388672	-0.202637	-0.182129
-54.4	-0.415527	-0.146973	-0.414063	0.0458984	-0.407227	-0.210938	-0.186035
-54.3	-0.40625	-0.147949	-0.407227	0.0551758	-0.397461	-0.199707	-0.196289
-54.2	-0.429688	-0.183594	-0.410156	0.03125	-0.421387	-0.225098	-0.213379
-54.1	-0.458984	-0.207031	-0.419434	0.00390625	-0.449219	-0.243164	-0.225098
-54	-0.471191	-0.223633	-0.424316	0.00146484	-0.453613	-0.24707	-0.240723
-53.9	-0.493652	-0.236816	-0.419434	0.00683594	-0.464355	-0.24707	-0.23291
-53.8	-0.487305	-0.268066	-0.435059	-0.015625	-0.476074	-0.24707	-0.23291
-53.7	-0.481934	-0.275879	-0.404785	-0.0102539	-0.475098	-0.240723	-0.221191
-53.6	-0.472656	-0.27832	-0.414063	-0.00341797	-0.462891	-0.226074	-0.213379
-53.5	-0.487305	-0.286621	-0.408691	-0.0131836	-0.464355	-0.22998	-0.221191
-53.4	-0.493652	-0.292969	-0.415527	-0.0219727	-0.461914	-0.238281	-0.21875
-53.3	-0.496094	-0.298828	-0.408691	-0.0244141	-0.467773	-0.23877	-0.204102
-53.2	-0.48584	-0.317871	-0.395996	-0.0219727	-0.467285	-0.242188	-0.199219
-53.1	-0.497559	-0.318848	-0.399902	-0.0351563	-0.476074	-0.258789	-0.205566
-53	-0.48584	-0.325195	-0.407227	-0.0424805	-0.468262	-0.258789	-0.219727
-52.9	-0.478027	-0.320313	-0.407715	-0.0366211	-0.454102	-0.248535	-0.213379
-52.8	-0.48584	-0.335449	-0.408691	-0.0463867	-0.465332	-0.262207	-0.21582
-52.7	-0.493652	-0.356934	-0.417969	-0.0703125	-0.487793	-0.268066	-0.243652
-52.6	-0.487305	-0.348633	-0.431152	-0.0664063	-0.500977	-0.26416	-0.262695
-52.5	-0.511719	-0.375977	-0.436035	-0.081543	-0.513672	-0.276855	-0.270508
-52.4	-0.507813	-0.371094	-0.421875	-0.0859375	-0.49707	-0.271973	-0.265625
-52.3	-0.510742	-0.377441	-0.449219	-0.0922852	-0.526855	-0.284668	-0.286133
-52.2	-0.513184	-0.365723	-0.4375	-0.0830078	-0.523926	-0.27832	-0.283691
-52.1	-0.513184	-0.38916	-0.449219	-0.104004	-0.529785	-0.290039	-0.296875
-52	-0.50293	-0.386719	-0.435059	-0.09375	-0.504883	-0.279785	-0.299316
-51.9	-0.503906	-0.373535	-0.427246	-0.0820313	-0.505859	-0.280762	-0.292969
-51.8	-0.50293	-0.365723	-0.424316	-0.0869141	-0.493164	-0.285156	-0.297852
-51.7	-0.492188	-0.378418	-0.417969	-0.0844727	-0.496582	-0.271484	-0.303223
-51.6	-0.475586	-0.366211	-0.40625	-0.0688477	-0.494629	-0.257813	-0.291504
-51.5	-0.48291	-0.366699	-0.408691	-0.0844727	-0.498047	-0.265137	-0.303223
-51.4	-0.484863	-0.364746	-0.416992	-0.0820313	-0.515137	-0.260254	-0.311035
-51.3	-0.474121	-0.362793	-0.40332	-0.0893555	-0.495605	-0.253418	-0.303223
-51.2	-0.486816	-0.369629	-0.410156	-0.0947266	-0.508301	-0.250977	-0.304199
-51.1	-0.475586	-0.361816	-0.398438	-0.0756836	-0.490723	-0.239258	-0.306152
-51	-0.457031	-0.35791	-0.398438	-0.0727539	-0.483887	-0.250977	-0.322754
-50.9	-0.467773	-0.346191	-0.399902	-0.0712891	-0.486328	-0.249512	-0.313477
-50.8	-0.472656	-0.355469	-0.40625	-0.0844727	-0.495605	-0.260254	-0.332031
-50.7	-0.465332	-0.346191	-0.40625	-0.0834961	-0.475098	-0.24707	-0.308594
-50.6	-0.460938	-0.338379	-0.396973	-0.081543	-0.484863	-0.250977	-0.304199
-50.5	-0.45459	-0.333008	-0.384277	-0.0844727	-0.485352	-0.243164	-0.300781
-50.4	-0.458496	-0.330566	-0.379883	-0.0844727	-0.466797	-0.231445	-0.29541
-50.3	-0.450684	-0.32666	-0.376465	-0.0844727	-0.456543	-0.237793	-0.290039
-50.2	-0.435059	-0.314941	-0.368652	-0.078125	-0.446289	-0.21875	-0.282715
-50.1	-0.436523	-0.317871	-0.386719	-0.0751953	-0.458008	-0.222168	-0.282227
-50	-0.455566	-0.327637	-0.38916	-0.0922852	-0.473145	-0.231445	-0.314941
-49.9	-0.443359	-0.317871	-0.39209	-0.0820313	-0.467285	-0.217285	-0.303223
-49.8	-0.433594	-0.313477	-0.404785	-0.0595703	-0.453613	-0.208984	-0.305664
-49.7	-0.441406	-0.303223	-0.395996	-0.0703125	-0.468262	-0.209473	-0.320313
-49.6	-0.432617	-0.297852	-0.386719	-0.0517578	-0.468262	-0.200195	-0.314941
-49.5	-0.417969	-0.283691	-0.390625	-0.0493164	-0.469727	-0.192383	-0.311035
-49.4	-0.45459	-0.300781	-0.414063	-0.0859375	-0.476074	-0.219727	-0.32666
-49.3	-0.466309	-0.314941	-0.429688	-0.0922852	-0.487793	-0.219727	-0.354004
-49.2	-0.462402	-0.301758	-0.446289	-0.0830078	-0.490234	-0.206543	-0.354004
-49.1	-0.505371	-0.351563	-0.491211	-0.105469	-0.534668	-0.238281	-0.382813
-49	-0.488281	-0.348633	-0.486816	-0.10791	-0.568359	-0.233887	-0.391602
-48.9	-0.506836	-0.369629	-0.498535	-0.125977	-0.638672	-0.274414	-0.400879
-48.8	-0.487305	-0.359375	-0.496094	-0.123535	-0.629883	-0.269043	-0.393066
-48.7	-0.470215	-0.379883	-0.48584	-0.140625	-0.642578	-0.282227	-0.407227
-48.6	-0.51416	-0.394531	-0.515625	-0.174316	-0.672852	-0.386719	-0.468262
-48.5	-0.510742	-0.4375	-0.540039	-0.220215	-0.640137	-0.564941	-0.625977
-48.4	-0.497559	-0.583496	-0.560547	-0.318848	-0.498535	-0.450195	-0.584473
-48.3	-0.505371	-0.162109	-0.329102	-0.240234	-0.0512695	-0.0917969	-0.30127
-48.2	-0.591309	-0.329102	-0.504883	-0.234375	-0.206543	-0.279297	-0.646484
-48.1	-0.693359	-0.332031	-0.48877	-0.295898	-0.188477	-0.269531	-0.609375
-48	-0.249023	-0.307129	-0.457031	0.125	-0.228516	-0.255859	-0.279785
-47.9	-0.420898	-0.334473	-0.695313	-0.0961914	-0.520508	-0.268066	-0.336914
-47.8	-0.417969	-0.318848	-0.657715	-0.0898438	-0.519043	-0.227539	-0.296875
-47.7	-0.420898	-0.318848	-0.618652	-0.0444336	-0.489258	-0.171875	-0.255371
-47.6	-0.405273	-0.300781	-0.575684	0.0146484	-0.464355	-0.151855	-0.193848
-47.5	-0.395996	-0.311035	-0.566406	-0.0478516	-0.47998	-0.162598	-0.160156
-47.4	-0.381836	-0.322754	-0.560059	-0.0664063	-0.477539	-0.155762	-0.15332
-47.3	-0.375	-0.318848	-0.527344	-0.0986328	-0.437012	-0.146973	-0.162598
-47.2	-0.384277	-0.346191	-0.492188	-0.129883	-0.399414	-0.175293	-0.191406
-47.1	-0.382813	-0.347168	-0.471191	-0.161133	-0.376953	-0.16748	-0.179199
-47	-0.381836	-0.363281	-0.457031	-0.160156	-0.35498	-0.165039	-0.179688
-46.9	-0.40625	-0.37207	-0.492188	-0.180664	-0.358887	-0.174316	-0.200195
-46.8	-0.416992	-0.408691	-0.511719	-0.236816	-0.378418	-0.202637	-0.254883
-46.7	-0.429688	-0.440918	-0.529785	-0.254883	-0.410645	-0.241699	-0.317383
-46.6	-0.456055	-0.458496	-0.538086	-0.260742	-0.43457	-0.247559	-0.345215
-46.5	-0.493164	-0.486328	-0.532227	-0.248047	-0.474609	-0.240234	-0.331543
-46.4	-0.544434	-0.588379	-0.571289	-0.34082	-0.472168	-0.28418	-0.434082
-46.3	-0.479492	-0.348145	-0.521484	-0.0415039	-0.409668	-0.278809	-0.322754
-46.2	-0.930176	-0.324219	-1.21631	-0.222656	-0.993164	-0.223633	-0.200195
-46.1	0.29248	-0.296875	-0.904297	-0.958496	0.219238	0.0249023	0.22998
-46	-0.450684	-0.504395	0.0078125	-0.223145	-0.325195	-0.20459	-0.382813
-45.9	-0.232422	-0.34668	-0.0390625	-0.291504	-0.0126953	-0.140625	-0.152344
-45.8	-0.419434	-0.416504	-0.0566406	-0.242676	-0.289551	-0.254395	-0.338379
-45.7	-0.435059	-0.390625	-0.381348	-0.132813	-0.503418	-0.202637	-0.393066
-45.6	-0.388184	-0.300781	-0.436523	-0.00683594	-0.395508	-0.186035	-0.332031
-45.5	-0.331543	-0.283691	-0.361816	0.106934	-0.366699	-0.146484	-0.271973
-45.4	-0.356934	-0.27002	-0.398438	0.112305	-0.416016	-0.20752	-0.283691
-45.3	-0.398926	-0.306152	-0.489746	0.0317383	-0.469238	-0.208984	-0.335449
-45.2	-0.51709	-0.430664	-0.613281	-0.0766602	-0.593262	-0.241211	-0.338379
-45.1	-0.5625	-0.45752	-0.626953	-0.144043	-0.632324	-0.231445	-0.314453
-45	-0.544922	-0.438965	-0.594238	-0.157715	-0.596191	-0.235352	-0.290039
-44.9	-0.49707	-0.375977	-0.508789	-0.157227	-0.490234	-0.226074	-0.313477
-44.8	-0.512207	-0.328125	-0.528809	-0.106934	-0.473633	-0.225098	-0.306152
-44.7	-0.493652	-0.350098	-0.520996	-0.12207	-0.500977	-0.253418	-0.299316
-44.6	-0.483398	-0.354004	-0.472656	-0.131348	-0.490234	-0.283691	-0.277344
-44.5	-0.447754	-0.351074	-0.459473	-0.132324	-0.482422	-0.257324	-0.253418
-44.4	-0.467773	-0.322754	-0.459473	-0.125	-0.464355	-0.239258	-0.252441
-44.3	-0.481934	-0.304688	-0.467773	-0.131348	-0.459473	-0.248535	-0.242188
-44.2	-0.480469	-0.291504	-0.461914	-0.127441	-0.451172	-0.237793	-0.240723
-44.1	-0.461426	-0.272461	-0.441895	-0.0991211	-0.432129	-0.21875	-0.228027
-44	-0.44043	-0.243164	-0.404785	-0.0830078	-0.412109	-0.200195	-0.208008
-43.9	-0.429688	-0.231445	-0.394531	-0.0805664	-0.416016	-0.19873	-0.189941
-43.8	-0.411621	-0.199219	-0.368652	-0.0429688	-0.399414	-0.182129	-0.162598
-43.7	-0.403809	-0.207031	-0.373535	-0.0478516	-0.401855	-0.188477	-0.160156
-43.6	-0.411621	-0.218262	-0.367188	-0.0532227	-0.38623	-0.190918	-0.155762
-43.5	-0.410156	-0.236816	-0.365723	-0.0415039	-0.390137	-0.192383	-0.178223
-43.4	-0.399902	-0.229004	-0.363281	-0.0361328	-0.400391	-0.204102	-0.1875
-43.3	-0.416992	-0.230469	-0.37793	-0.046875	-0.408691	-0.231445	-0.196289
-43.2	-0.407715	-0.226074	-0.361816	-0.0415039	-0.391113	-0.21582	-0.200195
-43.1	-0.408691	-0.240723	-0.355469	-0.0415039	-0.387695	-0.202637	-0.193848
-43	-0.420898	-0.234375	-0.367188	-0.0400391	-0.392578	-0.208008	-0.191406
-42.9	-0.395996	-0.209473	-0.367188	-0.0351563	-0.38623	-0.192383	-0.182129
-42.8	-0.407715	-0.209473	-0.369629	-0.0439453	-0.379883	-0.20166	-0.182129
-42.7	-0.42334	-0.209473	-0.388184	-0.0507813	-0.396484	-0.206543	-0.196289
-42.6	-0.421875	-0.209473	-0.394531	-0.0439453	-0.405762	-0.20166	-0.207031
-42.5	-0.428711	-0.211914	-0.396973	-0.0532227	-0.40332	-0.208008	-0.213379
-42.4	-0.435059	-0.222656	-0.40625	-0.0546875	-0.408203	-0.210449	-0.223633
-42.3	-0.424805	-0.221191	-0.395996	-0.0493164	-0.409668	-0.221191	-0.224121
-42.2	-0.416504	-0.221191	-0.38916	-0.0336914	-0.409668	-0.222168	-0.222168
-42.1	-0.420898	-0.221191	-0.398438	-0.0375977	-0.411133	-0.23291	-0.226563
-42	-0.432617	-0.222656	-0.407715	-0.0664063	-0.41748	-0.240723	-0.23291
-41.9	-0.411621	-0.223633	-0.385254	-0.0620117	-0.404297	-0.236328	-0.231445
-41.8	-0.411621	-0.217285	-0.37793	-0.0639648	-0.393066	-0.236816	-0.224121
-41.7	-0.411621	-0.207031	-0.363281	-0.0493164	-0.370605	-0.218262	-0.209473
-41.6	-0.410156	-0.211914	-0.369629	-0.050293	-0.369141	-0.227539	-0.208008
-41.5	-0.407715	-0.211914	-0.355469	-0.0454102	-0.357422	-0.219727	-0.196289
-41.4	-0.410156	-0.222656	-0.35791	-0.0454102	-0.366699	-0.219727	-0.213379
-41.3	-0.427246	-0.236816	-0.364746	-0.0478516	-0.368164	-0.233887	-0.213379
-41.2	-0.427246	-0.236816	-0.35791	-0.0571289	-0.38623	-0.243164	-0.213379
-41.1	-0.424805	-0.225098	-0.353027	-0.0507813	-0.37207	-0.229004	-0.199219
-41	-0.415527	-0.225098	-0.34375	-0.0336914	-0.365234	-0.227539	-0.189941
-40.9	-0.415527	-0.222656	-0.355469	-0.0336914	-0.374512	-0.227539	-0.189941
-40.8	-0.407715	-0.217285	-0.347656	-0.0258789	-0.366699	-0.217285	-0.179688
-40.7	-0.415527	-0.21582	-0.347656	-0.0258789	-0.378418	-0.208008	-0.182129
-40.6	-0.417969	-0.213379	-0.350098	-0.0361328	-0.398926	-0.222168	-0.18457
-40.5	-0.427246	-0.236816	-0.359375	-0.046875	-0.418945	-0.231445	-0.193848
-40.4	-0.413086	-0.225098	-0.347656	-0.0415039	-0.413574	-0.222168	-0.182129
-40.3	-0.403809	-0.225098	-0.347656	-0.0415039	-0.427734	-0.231445	-0.182129
-40.2	-0.416992	-0.21875	-0.358398	-0.0429688	-0.438477	-0.23291	-0.183594
-40.1	-0.42334	-0.227539	-0.355469	-0.0493164	-0.444824	-0.239258	-0.189941
-40	-0.414063	-0.235352	-0.346191	-0.0424805	-0.437012	-0.22998	-0.183105
-39.9	-0.407715	-0.21875	-0.342285	-0.0375977	-0.435547	-0.223633	-0.186035
-39.8	-0.407715	-0.209473	-0.351563	-0.0390625	-0.426758	-0.223633	-0.186035
-39.7	-0.410156	-0.211914	-0.351563	-0.0415039	-0.41748	-0.225098	-0.186035
-39.6	-0.419434	-0.229004	-0.351563	-0.0244141	-0.416016	-0.231445	-0.1875
-39.5	-0.405273	-0.216309	-0.34668	0.0102539	-0.395508	-0.217285	-0.182129
-39.4	-0.397461	-0.208008	-0.34375	0.0288086	-0.38623	-0.208008	-0.182129
-39.3	-0.411621	-0.217285	-0.34375	0.0263672	-0.38623	-0.208008	-0.189941
-39.2	-0.402344	-0.208008	-0.336914	0.0131836	-0.374512	-0.201172	-0.183105
-39.1	-0.395996	-0.20166	-0.339844	0.0131836	-0.361328	-0.204102	-0.179688
-39	-0.395996	-0.20166	-0.339844	0.00537109	-0.370605	-0.204102	-0.192383
-38.9	-0.397461	-0.213379	-0.341309	0.00390625	-0.37207	-0.205566	-0.200684
-38.8	-0.39209	-0.217285	-0.335938	0.00927734	-0.366699	-0.197754	-0.20166
-38.7	-0.403809	-0.21875	-0.335938	-0.000976563	-0.368164	-0.188477	-0.200195
-38.6	-0.402344	-0.225098	-0.345215	0.00537109	-0.38623	-0.188477	-0.193848
-38.5	-0.384277	-0.225098	-0.324219	0.015625	-0.374512	-0.179199	-0.191406
-38.4	-0.384277	-0.223633	-0.324219	0.00537109	-0.382324	-0.188477	-0.182129
-38.3	-0.37793	-0.207031	-0.314941	-0.0126953	-0.374512	-0.188477	-0.176758
-38.2	-0.395996	-0.200195	-0.308594	-0.015625	-0.373047	-0.188477	-0.197754
-38.1	-0.395996	-0.209473	-0.308594	-0.0297852	-0.366699	-0.188477	-0.226563
-38	-0.39209	-0.197754	-0.296875	-0.0180664	-0.352539	-0.186035	-0.223633
-37.9	-0.393066	-0.197754	-0.303223	-0.0166016	-0.344238	-0.177734	-0.229004
-37.8	-0.393555	-0.20166	-0.296875	-0.0205078	-0.348633	-0.180664	-0.221191
-37.7	-0.384277	-0.227539	-0.29834	-0.0141602	-0.357422	-0.182129	-0.221191
-37.6	-0.398438	-0.229004	-0.307129	-0.0117188	-0.366699	-0.190918	-0.221191
-37.5	-0.399902	-0.221191	-0.322754	0.00537109	-0.362793	-0.196289	-0.213379
-37.4	-0.405273	-0.21875	-0.331055	0.0078125	-0.379883	-0.211914	-0.207031
-37.3	-0.397461	-0.217285	-0.330566	0.0107422	-0.388672	-0.223633	-0.180664
-37.2	-0.402344	-0.21582	-0.339844	0.0263672	-0.397949	-0.223633	-0.17041
-37.1	-0.384277	-0.209473	-0.328125	0.0444336	-0.38623	-0.211914	-0.143066
-37	-0.388184	-0.200684	-0.32959	0.0429688	-0.387695	-0.20166	-0.146973
-36.9	-0.403809	-0.213379	-0.334473	0.0351563	-0.394043	-0.208008	-0.162598
-36.8	-0.415527	-0.225098	-0.328125	0.0288086	-0.392578	-0.208008	-0.162598
-36.7	-0.407715	-0.21582	-0.318848	0.0380859	-0.376953	-0.197266	-0.154785
-36.6	-0.395996	-0.196289	-0.300781	0.0561523	-0.358887	-0.17041	-0.143066
-36.5	-0.403809	-0.178223	-0.300781	0.0654297	-0.351074	-0.161133	-0.146973
-36.4	-0.403809	-0.175781	-0.308594	0.0561523	-0.351074	-0.149414	-0.165039
-36.3	-0.415527	-0.166504	-0.308594	0.0444336	-0.351074	-0.161133	-0.178223
-36.2	-0.405273	-0.154785	-0.29834	0.0571289	-0.34082	-0.150879	-0.185059
-36.1	-0.410156	-0.15332	-0.304688	0.0615234	-0.345703	-0.155762	-0.19873
-36	-0.403809	-0.148438	-0.304688	0.0678711	-0.339355	-0.149414	-0.204102
-35.9	-0.398438	-0.149414	-0.296875	0.0732422	-0.331543	-0.144043	-0.205566
-35.8	-0.405273	-0.152344	-0.296875	0.0625	-0.333008	-0.15332	-0.205566
-35.7	-0.395996	-0.161133	-0.296875	0.0512695	-0.339355	-0.15332	-0.203125
-35.6	-0.393555	-0.169434	-0.294434	0.0336914	-0.336914	-0.152344	-0.188965
-35.5	-0.384277	-0.168945	-0.277344	0.0341797	-0.327637	-0.149414	-0.166504
-35.4	-0.372559	-0.166504	-0.265625	0.0366211	-0.32373	-0.141602	-0.131348
-35.3	-0.372559	-0.168945	-0.271973	0.046875	-0.319824	-0.157227	-0.131348
-35.2	-0.375	-0.178223	-0.268066	0.0356445	-0.337891	-0.150391	-0.133789
-35.1	-0.382813	-0.178223	-0.277344	0.0195313	-0.347168	-0.166504	-0.143066
-35	-0.366211	-0.167969	-0.26709	0.0390625	-0.336914	-0.146973	-0.13916
-34.9	-0.356934	-0.158691	-0.259277	0.0483398	-0.327637	-0.129883	-0.123535
-34.8	-0.356934	-0.158691	-0.26416	0.0483398	-0.315918	-0.128418	-0.125
-34.7	-0.356934	-0.15625	-0.257813	0.0498047	-0.315918	-0.12207	-0.125977
-34.6	-0.366211	-0.146973	-0.259277	0.0561523	-0.315918	-0.12207	-0.136719
-34.5	-0.372559	-0.15332	-0.265625	0.0561523	-0.315918	-0.119629	-0.145508
-34.4	-0.371094	-0.146973	-0.275879	0.0546875	-0.315918	-0.0986328	-0.165039
-34.3	-0.367188	-0.149414	-0.271973	0.0356445	-0.316895	-0.101074	-0.174316
-34.2	-0.37793	-0.160156	-0.282715	0.0336914	-0.321289	-0.110352	-0.17334
-34.1	-0.384277	-0.166504	-0.286621	0.0366211	-0.327637	-0.10791	-0.17041
-34	-0.395996	-0.175781	-0.285156	0.0263672	-0.329102	-0.0908203	-0.17041
-33.9	-0.395996	-0.168945	-0.279785	0.0170898	-0.340332	-0.0932617	-0.175293
-33.8	-0.395996	-0.192383	-0.287598	0.0170898	-0.362793	-0.102539	-0.208008
-33.7	-0.398438	-0.189941	-0.270996	0.0146484	-0.375977	-0.0908203	-0.205566
-33.6	-0.406738	-0.1875	-0.274902	0.0102539	-0.362793	-0.0883789	-0.200684
-33.5	-0.411621	-0.186035	-0.265625	0.0302734	-0.333008	-0.0791016	-0.182129
-33.4	-0.410156	-0.186035	-0.265625	0.0366211	-0.335449	-0.0673828	-0.167969
-33.3	-0.401367	-0.183594	-0.26416	0.0366211	-0.331543	-0.0673828	-0.157227
-33.2	-0.390625	-0.172852	-0.255371	0.0390625	-0.315918	-0.0649414	-0.146973
-33.1	-0.393555	-0.166504	-0.246094	0.0483398	-0.312012	-0.0541992	-0.123535
-33	-0.376465	-0.15625	-0.238281	0.0585938	-0.288574	-0.0400391	-0.113281
-32.9	-0.375	-0.145508	-0.23584	0.0693359	-0.274414	-0.0400391	-0.104004
-32.8	-0.356934	-0.127441	-0.21582	0.0849609	-0.251953	-0.0283203	-0.0932617
-32.7	-0.364746	-0.127441	-0.21875	0.0756836	-0.244141	-0.0283203	-0.09375
-32.6	-0.366211	-0.128906	-0.217773	0.0766602	-0.236816	-0.0297852	-0.0859375
-32.5	-0.368652	-0.123535	-0.213379	0.0795898	-0.233887	-0.034668	-0.0908203
-32.4	-0.367188	-0.110352	-0.209473	0.0771484	-0.234863	-0.0283203	-0.0751953
-32.3	-0.374023	-0.125	-0.216309	0.0678711	-0.239258	-0.0307617	-0.0961914
-32.2	-0.364746	-0.115723	-0.207031	0.0678711	-0.245605	-0.0375977	-0.0976563
-32.1	-0.364746	-0.115723	-0.214844	0.0678711	-0.245605	-0.0205078	-0.104004
-32	-0.364746	-0.10791	-0.207031	0.0678711	-0.245605	-0.0205078	-0.111816
-31.9	-0.356934	-0.100098	-0.207031	0.0756836	-0.249512	-0.0126953	-0.104004
-31.8	-0.355469	-0.100098	-0.199219	0.0756836	-0.248047	-0.0151367	-0.104004
-31.7	-0.356934	-0.100098	-0.207031	0.0771484	-0.239258	-0.0126953	-0.0947266
-31.6	-0.356934	-0.0986328	-0.207031	0.0859375	-0.22998	-0.0102539	-0.0859375
-31.5	-0.354492	-0.0922852	-0.207031	0.0952148	-0.226074	-0.000976563	-0.0766602
-31.4	-0.333496	-0.0805664	-0.193848	0.120117	-0.19873	0.0107422	-0.0625
-31.3	-0.32959	-0.078125	-0.196777	0.13916	-0.20166	0.0131836	-0.0585938
-31.2	-0.313965	-0.0688477	-0.178223	0.147461	-0.184082	0.0200195	-0.0517578
-31.1	-0.302246	-0.0571289	-0.175781	0.149902	-0.172852	0.0224609	-0.0478516
-31	-0.303711	-0.0454102	-0.186523	0.150879	-0.165039	0.00927734	-0.0429688
-30.9	-0.308594	-0.0454102	-0.183594	0.155273	-0.169922	0.0146484	-0.046875
-30.8	-0.302246	-0.0454102	-0.186035	0.15918	-0.166016	0.0136719	-0.0400391
-30.7	-0.295898	-0.0507813	-0.1875	0.15625	-0.166504	0.00390625	-0.0571289
-30.6	-0.302246	-0.0556641	-0.1875	0.149902	-0.163574	-0.0112305	-0.0727539
-30.5	-0.290527	-0.0351563	-0.175781	0.149902	-0.154297	-0.00634766	-0.0610352
-30.4	-0.282715	-0.0258789	-0.175781	0.149902	-0.163574	0.00292969	-0.0610352
-30.3	-0.272461	-0.0180664	-0.181152	0.15625	-0.157227	0.0107422	-0.0610352
-30.2	-0.265625	-0.0205078	-0.188477	0.147461	-0.168457	0.00830078	-0.0649414
-30.1	-0.274902	-0.0322266	-0.192871	0.138184	-0.187012	-0.000976563	-0.0805664
-30	-0.270996	-0.03125	-0.1875	0.149902	-0.187012	0.00830078	-0.0688477
-29.9	-0.273438	-0.0375977	-0.195313	0.149902	-0.176758	-0.000976563	-0.0805664
-29.8	-0.282715	-0.0375977	-0.195313	0.147461	-0.185547	-0.00244141	-0.0830078
-29.7	-0.274902	-0.0297852	-0.1875	0.145996	-0.19873	-0.000976563	-0.0869141
-29.6	-0.279785	-0.0400391	-0.192383	0.143555	-0.203613	-0.00585938	-0.0986328
-29.5	-0.28418	-0.0375977	-0.199219	0.134277	-0.211914	-0.0126953	-0.0961914
-29.4	-0.276367	-0.0390625	-0.200684	0.132813	-0.219727	-0.0141602	-0.0976563
-29.3	-0.28125	-0.0439453	-0.205566	0.125488	-0.224609	-0.019043	-0.104004
-29.2	-0.289063	-0.0400391	-0.196777	0.122559	-0.226074	-0.0141602	-0.104004
-29.1	-0.290527	-0.0390625	-0.179688	0.121094	-0.222168	-0.0126953	-0.106445
-29	-0.280273	-0.0180664	-0.182129	0.124023	-0.226074	-0.00341797	-0.105469
-28.9	-0.286621	-0.0205078	-0.191406	0.114746	-0.226074	-0.0126953	-0.111816
-28.8	-0.273438	-0.0180664	-0.179688	0.125	-0.228516	-0.00341797	-0.114258
-28.7	-0.260742	-0.0117188	-0.17334	0.126465	-0.22998	-0.00634766	-0.104004
-28.6	-0.264648	-0.015625	-0.177246	0.117188	-0.227539	-0.0102539	-0.103027
-28.5	-0.246094	0.0131836	-0.15625	0.147461	-0.208008	0.00292969	-0.0883789
-28.4	-0.256836	0.00537109	-0.15625	0.126465	-0.216797	0.00292969	-0.102539
-28.3	-0.263184	0.00292969	-0.158691	0.126465	-0.227539	0.000488281	-0.111816
-28.2	-0.255371	0.00146484	-0.160156	0.126465	-0.226074	-0.00244141	-0.104004
-28.1	-0.257813	0.00927734	-0.169434	0.132813	-0.226074	-0.0205078	-0.104004
-28	-0.26709	0.0078125	-0.1875	0.116211	-0.236328	-0.0229492	-0.105469
-27.9	-0.254395	0.015625	-0.175781	0.121094	-0.223633	-0.0180664	-0.0976563
-27.8	-0.253906	0.0224609	-0.164063	0.138184	-0.214355	-0.0102539	-0.0908203
-27.7	-0.255371	0.0209961	-0.15625	0.138184	-0.206543	-0.0166016	-0.0922852
-27.6	-0.256836	0.0185547	-0.15625	0.135742	-0.216797	-0.0166016	-0.0947266
-27.5	-0.261719	0.00927734	-0.15625	0.12793	-0.224609	-0.0268555	-0.104004
-27.4	-0.231934	0.0209961	-0.146973	0.144531	-0.208008	-0.0112305	-0.0922852
-27.3	-0.246094	0.0185547	-0.15625	0.138184	-0.214355	-0.0205078	-0.0922852
-27.2	-0.241211	0.0234375	-0.153809	0.138184	-0.200195	-0.00634766	-0.0805664
-27.1	-0.234375	0.03125	-0.146973	0.149902	-0.205078	0.00146484	-0.0805664
-27	-0.243652	0.0224609	-0.157715	0.149902	-0.21582	-0.00488281	-0.0820313
-26.9	-0.243652	0.00537109	-0.162598	0.149902	-0.220703	-0.00585938	-0.0869141
-26.8	-0.246094	0.00292969	-0.15625	0.149902	-0.216797	-0.00878906	-0.0805664
-26.7	-0.255371	-0.00634766	-0.166504	0.138184	-0.226074	-0.0112305	-0.0830078
-26.6	-0.254395	-0.00537109	-0.174805	0.138184	-0.225098	-0.0195313	-0.0898438
-26.5	-0.251465	-0.00488281	-0.171875	0.136719	-0.222168	-0.0166016	-0.0688477
-26.4	-0.251465	-0.0258789	-0.171875	0.130371	-0.224609	-0.019043	-0.0703125
-26.3	-0.239746	-0.0141602	-0.171875	0.130371	-0.233887	-0.0283203	-0.0791016
-26.2	-0.242188	-0.0258789	-0.171875	0.130371	-0.233887	-0.0283203	-0.0883789
-26.1	-0.25	-0.0151367	-0.172852	0.129395	-0.234863	-0.0361328	-0.0791016
-26	-0.245117	-0.03125	-0.175781	0.125	-0.239258	-0.0361328	-0.0727539
-25.9	-0.251465	-0.0375977	-0.17334	0.118652	-0.243164	-0.0361328	-0.0703125
-25.8	-0.243652	-0.0390625	-0.164063	0.118652	-0.236328	-0.0361328	-0.0625
-25.7	-0.243652	-0.0439453	-0.164063	0.120117	-0.244141	-0.034668	-0.0698242
-25.6	-0.243652	-0.0375977	-0.17334	0.125	-0.236816	-0.0258789	-0.0703125
-25.5	-0.246094	-0.0390625	-0.152344	0.11084	-0.233887	-0.0180664	-0.0634766
-25.4	-0.247559	-0.0400391	-0.146973	0.116211	-0.226074	-0.0283203	-0.0649414
-25.3	-0.246582	-0.046875	-0.153809	0.109375	-0.223633	-0.0141602	-0.0639648
-25.2	-0.244629	-0.0375977	-0.145508	0.118652	-0.215332	-0.0175781	-0.0595703
-25.1	-0.237305	-0.0375977	-0.160156	0.116211	-0.218262	-0.0112305	-0.0532227
-25	-0.243652	-0.0375977	-0.15918	0.109375	-0.227539	-0.03125	-0.0415039
-24.9	-0.255371	-0.0463867	-0.154785	0.118652	-0.232422	-0.0268555	-0.0415039
-24.8	-0.255371	-0.0493164	-0.150879	0.104492	-0.226074	-0.0229492	-0.0415039
-24.7	-0.255371	-0.0483398	-0.145996	0.109375	-0.235352	-0.0297852	-0.0415039
-24.6	-0.257813	-0.0454102	-0.138184	0.117188	-0.227539	-0.0219727	-0.0336914
-24.5	-0.268555	-0.0478516	-0.144531	0.11084	-0.233887	-0.0307617	-0.0351563
-24.4	-0.28125	-0.0649414	-0.165039	0.102051	-0.242676	-0.0463867	-0.050293
-24.3	-0.272461	-0.0625	-0.166992	0.109375	-0.243164	-0.0507813	-0.0532227
-24.2	-0.265625	-0.0556641	-0.166504	0.108398	-0.236328	-0.050293	-0.0532227
-24.1	-0.274902	-0.0556641	-0.167969	0.106934	-0.236328	-0.0385742	-0.0454102
-24	-0.280273	-0.0561523	-0.17334	0.101563	-0.248535	-0.0390625	-0.0507813
-23.9	-0.285156	-0.0556641	-0.166504	0.106934	-0.248047	-0.0385742	-0.0439453
-23.8	-0.285645	-0.0546875	-0.167969	0.101563	-0.248535	-0.0400391	-0.0444336
-23.7	-0.283691	-0.0463867	-0.166504	0.112305	-0.244141	-0.050293	-0.0400391
-23.6	-0.28418	-0.0483398	-0.15918	0.121094	-0.235352	-0.0429688	-0.0336914
-23.5	-0.274902	-0.0454102	-0.15625	0.12793	-0.228516	-0.0424805	-0.0336914
-23.4	-0.274902	-0.0463867	-0.157227	0.118652	-0.224609	-0.0517578	-0.0336914
-23.3	-0.277344	-0.0507813	-0.161621	0.124023	-0.218262	-0.0517578	-0.0244141
-23.2	-0.286621	-0.0571289	-0.17041	0.114746	-0.222168	-0.0517578	-0.0336914
-23.1	-0.286621	-0.0571289	-0.177246	0.114746	-0.235352	-0.0517578	-0.0327148
-23	-0.295898	-0.0585938	-0.179688	0.113281	-0.226074	-0.0517578	-0.0322266
-22.9	-0.300781	-0.065918	-0.167969	0.108398	-0.226074	-0.0595703	-0.0424805
-22.8	-0.294434	-0.078125	-0.167969	0.117188	-0.237793	-0.0571289	-0.0444336
-22.7	-0.282715	-0.0585938	-0.15625	0.12793	-0.228516	-0.0385742	-0.0322266
-22.6	-0.303711	-0.0766602	-0.166992	0.10791	-0.248535	-0.0585938	-0.0639648
-22.5	-0.294434	-0.0776367	-0.176758	0.117676	-0.246582	-0.0566406	-0.0595703
-22.4	-0.285156	-0.0805664	-0.167969	0.113281	-0.249512	-0.0595703	-0.0556641
-22.3	-0.28418	-0.0678711	-0.15625	0.121094	-0.236816	-0.0595703	-0.0507813
-22.2	-0.290527	-0.0737305	-0.15625	0.129395	-0.234863	-0.0595703	-0.0415039
-22.1	-0.292969	-0.078125	-0.158691	0.125	-0.239258	-0.0595703	-0.0517578
-22	-0.291992	-0.0766602	-0.169434	0.138184	-0.237793	-0.0517578	-0.0546875
-21.9	-0.296875	-0.0766602	-0.161621	0.135742	-0.248047	-0.0610352	-0.0610352
-21.8	-0.31543	-0.0859375	-0.175781	0.105469	-0.266602	-0.0673828	-0.0712891
-21.7	-0.314941	-0.0854492	-0.166504	0.100586	-0.267578	-0.0605469	-0.0727539
-21.6	-0.316895	-0.0859375	-0.167969	0.106934	-0.274414	-0.0610352	-0.0844727
-21.5	-0.320313	-0.0844727	-0.174316	0.0991211	-0.285645	-0.0581055	-0.0922852
-21.4	-0.313965	-0.0961914	-0.169434	0.0874023	-0.286133	-0.0585938	-0.0898438
-21.3	-0.312988	-0.0961914	-0.17334	0.0898438	-0.275879	-0.0556641	-0.0805664
-21.2	-0.311035	-0.0961914	-0.165039	0.0913086	-0.262207	-0.0566406	-0.0805664
-21.1	-0.313965	-0.0986328	-0.181152	0.0913086	-0.266602	-0.0610352	-0.0883789
-21	-0.306152	-0.0991211	-0.179688	0.0874023	-0.265137	-0.0688477	-0.0805664
-20.9	-0.306152	-0.0947266	-0.179688	0.0888672	-0.275391	-0.0605469	-0.0830078
-20.8	-0.308594	-0.0908203	-0.182129	0.0952148	-0.259766	-0.0649414	-0.104004
-20.7	-0.319336	-0.100098	-0.195313	0.0820313	-0.269043	-0.0712891	-0.106445
-20.6	-0.323242	-0.0991211	-0.198242	0.0898438	-0.268066	-0.0712891	-0.114746
-20.5	-0.314941	-0.097168	-0.193848	0.0888672	-0.263672	-0.0698242	-0.112793
-20.4	-0.31543	-0.0976563	-0.1875	0.0952148	-0.258789	-0.0703125	-0.126465
-20.3	-0.307617	-0.0908203	-0.189941	0.0952148	-0.267578	-0.081543	-0.133789
-20.2	-0.3125	-0.0976563	-0.196777	0.0966797	-0.274414	-0.0869141	-0.140625
-20.1	-0.295898	-0.0791016	-0.178223	0.106934	-0.255859	-0.0595703	-0.12207
-20	-0.300781	-0.0859375	-0.185059	0.109375	-0.262695	-0.0634766	-0.141602
-19.9	-0.294434	-0.0766602	-0.178223	0.106934	-0.253418	-0.0478516	-0.136719
-19.8	-0.290527	-0.0751953	-0.185059	0.11084	-0.251953	-0.0556641	-0.13916
-19.7	-0.28418	-0.0664063	-0.1875	0.121094	-0.243164	-0.0375977	-0.121094
-19.6	-0.274902	-0.0585938	-0.188965	0.130371	-0.245605	-0.0283203	-0.111816
-19.5	-0.274902	-0.0649414	-0.197754	0.118652	-0.248047	-0.0400391	-0.118164
-19.4	-0.282715	-0.0532227	-0.207031	0.118652	-0.257324	-0.0493164	-0.123535
-19.3	-0.282715	-0.0649414	-0.207031	0.112305	-0.265137	-0.0556641	-0.125
-19.2	-0.285156	-0.0649414	-0.209473	0.106934	-0.265137	-0.0556641	-0.131348
-19.1	-0.294434	-0.0649414	-0.21875	0.0991211	-0.265137	-0.0541992	-0.133789
-19	-0.294434	-0.0649414	-0.21875	0.0874023	-0.257324	-0.0595703	-0.144531
-18.9	-0.294434	-0.0649414	-0.21875	0.0874023	-0.257324	-0.0595703	-0.158691
-18.8	-0.285156	-0.0556641	-0.209473	0.0991211	-0.245605	-0.050293	-0.149414
-18.7	-0.291992	-0.0517578	-0.203125	0.112305	-0.22998	-0.0517578	-0.141602
-18.6	-0.29834	-0.0688477	-0.210938	0.103027	-0.22998	-0.0517578	-0.146973
-18.5	-0.295898	-0.0664063	-0.208496	0.09375	-0.227539	-0.0493164	-0.144531
-18.4	-0.286621	-0.0571289	-0.199219	0.0952148	-0.220703	-0.0532227	-0.135254
-18.3	-0.290527	-0.0585938	-0.200684	0.0952148	-0.239258	-0.0595703	-0.132813
-18.2	-0.303711	-0.0625	-0.20459	0.0961914	-0.243164	-0.0649414	-0.121094
-18.1	-0.296875	-0.0556641	-0.195313	0.0874023	-0.236328	-0.0581055	-0.12207
-18	-0.304688	-0.0751953	-0.196289	0.0888672	-0.236328	-0.065918	-0.114258
-17.9	-0.288086	-0.0688477	-0.200684	0.0966797	-0.239258	-0.0712891	-0.10791
-17.8	-0.294434	-0.0664063	-0.20459	0.105469	-0.243164	-0.0688477	-0.103027
-17.7	-0.306152	-0.0571289	-0.195313	0.109375	-0.233887	-0.0571289	-0.0844727
-17.6	-0.303711	-0.0571289	-0.195313	0.121094	-0.233887	-0.0595703	-0.0922852
-17.5	-0.290527	-0.0742188	-0.205566	0.112305	-0.241699	-0.065918	-0.100098
-17.4	-0.300781	-0.0634766	-0.214844	0.122559	-0.240234	-0.0673828	-0.0976563
-17.3	-0.286621	-0.046875	-0.207031	0.138184	-0.223633	-0.0595703	-0.0791016
-17.2	-0.288086	-0.0400391	-0.207031	0.126465	-0.214355	-0.0556641	-0.0703125
-17.1	-0.296875	-0.0390625	-0.207031	0.125	-0.214355	-0.0415039	-0.0595703
-17	-0.313965	-0.0541992	-0.214844	0.108398	-0.212891	-0.0683594	-0.0595703
-16.9	-0.313965	-0.0688477	-0.212402	0.0966797	-0.204102	-0.0688477	-0.0625
-16.8	-0.313965	-0.0703125	-0.205566	0.0859375	-0.194824	-0.0712891	-0.0415039
-16.7	-0.303223	-0.0791016	-0.213379	0.074707	-0.199707	-0.0854492	-0.0532227
-16.6	-0.305176	-0.0766602	-0.199219	0.0585938	-0.21582	-0.0791016	-0.0532227
-16.5	-0.303223	-0.0766602	-0.197754	0.0678711	-0.205078	-0.0791016	-0.0517578
-16.4	-0.307617	-0.0791016	-0.192871	0.0654297	-0.200195	-0.081543	-0.046875
-16.3	-0.313965	-0.0898438	-0.199219	0.0561523	-0.206543	-0.0922852	-0.0532227
-16.2	-0.312988	-0.0961914	-0.20459	0.0571289	-0.21582	-0.100098	-0.0415039
-16.1	-0.322754	-0.100098	-0.193848	0.0576172	-0.227051	-0.111328	-0.0415039
-16	-0.3125	-0.114258	-0.175781	0.0483398	-0.243164	-0.129883	-0.0532227
-15.9	-0.299805	-0.09375	-0.163086	0.0507813	-0.233887	-0.119629	-0.0507813
-15.8	-0.272461	-0.0986328	-0.143066	0.0576172	-0.233887	-0.118164	-0.0322266
-15.7	-0.261719	-0.10791	-0.134277	0.0483398	-0.233887	-0.118164	-0.0415039
-15.6	-0.264648	-0.10791	-0.119629	0.0458984	-0.236328	-0.118164	-0.0439453
-15.5	-0.25293	-0.105469	-0.125	0.0390625	-0.243164	-0.114258	-0.0507813
-15.4	-0.242188	-0.0986328	-0.109375	0.0483398	-0.236328	-0.0986328	-0.0415039
-15.3	-0.23584	-0.10791	-0.109375	0.0366211	-0.243164	-0.0986328	-0.0415039
-15.2	-0.231934	-0.105469	-0.104492	0.0366211	-0.243164	-0.0961914	-0.0375977
-15.1	-0.216309	-0.0986328	-0.0859375	0.0483398	-0.236328	-0.0869141	-0.0351563
-15	-0.213867	-0.105469	-0.0751953	0.0498047	-0.245605	-0.0869141	-0.0400391
-14.9	-0.210938	-0.0986328	-0.078125	0.0561523	-0.244141	-0.0791016	-0.0336914
-14.8	-0.206055	-0.106934	-0.0913086	0.0546875	-0.240723	-0.0830078	-0.0351563
-14.7	-0.212402	-0.107422	-0.100098	0.0600586	-0.264648	-0.0996094	-0.0463867
-14.6	-0.212402	-0.118652	-0.11084	0.0561523	-0.27832	-0.111816	-0.0664063
-14.5	-0.212402	-0.125977	-0.117188	0.0419922	-0.282227	-0.10791	-0.0712891
-14.4	-0.212402	-0.117188	-0.117188	0.0493164	-0.284668	-0.0986328	-0.0546875
-14.3	-0.212402	-0.106445	-0.119629	0.0537109	-0.284668	-0.0996094	-0.0634766
-14.2	-0.216309	-0.101563	-0.132813	0.0654297	-0.284668	-0.102539	-0.0742188
-14.1	-0.234375	-0.110352	-0.148438	0.0483398	-0.283203	-0.104004	-0.0805664
-14	-0.243652	-0.119629	-0.148438	0.0507813	-0.276855	-0.112793	-0.0830078
-13.9	-0.246094	-0.119629	-0.13916	0.0576172	-0.276855	-0.10791	-0.0922852
-13.8	-0.25293	-0.117188	-0.147461	0.0507813	-0.275879	-0.0961914	-0.101563
-13.7	-0.23584	-0.100098	-0.13916	0.0678711	-0.255859	-0.0791016	-0.0751953
-13.6	-0.239746	-0.102539	-0.152344	0.0654297	-0.265137	-0.081543	-0.0869141
-13.5	-0.255371	-0.119629	-0.167969	0.0561523	-0.265137	-0.0908203	-0.0961914
-13.4	-0.255371	-0.119629	-0.166504	0.0561523	-0.265137	-0.0908203	-0.0961914
-13.3	-0.257813	-0.119629	-0.161621	0.0561523	-0.265137	-0.0854492	-0.0961914
-13.2	-0.264648	-0.117188	-0.165527	0.0585938	-0.265137	-0.0922852	-0.09375
-13.1	-0.255371	-0.10791	-0.15625	0.0678711	-0.265137	-0.0830078	-0.0859375
-13	-0.268555	-0.10791	-0.154785	0.0678711	-0.265137	-0.0830078	-0.0908203
-12.9	-0.274902	-0.10791	-0.140625	0.0678711	-0.276855	-0.0712891	-0.0844727
-12.8	-0.263184	-0.10791	-0.14209	0.0678711	-0.265137	-0.0712891	-0.0859375
-12.7	-0.263184	-0.10791	-0.148438	0.0678711	-0.262695	-0.0830078	-0.0922852
-12.6	-0.263184	-0.105469	-0.148438	0.0678711	-0.253418	-0.0727539	-0.0947266
-12.5	-0.265625	-0.0986328	-0.148438	0.0756836	-0.253418	-0.0791016	-0.104004
-12.4	-0.277344	-0.110352	-0.150879	0.0732422	-0.258301	-0.081543	-0.106445
-12.3	-0.272461	-0.105469	-0.136719	0.078125	-0.262695	-0.0766602	-0.101563
-12.2	-0.265625	-0.0986328	-0.150879	0.0849609	-0.255859	-0.0698242	-0.0961914
-12.1	-0.276367	-0.10791	-0.160156	0.0756836	-0.265137	-0.0673828	-0.111816
-12	-0.294434	-0.10791	-0.161621	0.0756836	-0.265137	-0.0791016	-0.111816
-11.9	-0.286621	-0.100098	-0.160156	0.0834961	-0.269043	-0.0712891	-0.104004
-11.8	-0.274902	-0.0883789	-0.148438	0.0952148	-0.257324	-0.0595703	-0.0922852
-11.7	-0.263184	-0.0883789	-0.136719	0.0952148	-0.257324	-0.0595703	-0.0947266
-11.6	-0.274902	-0.0883789	-0.13916	0.0952148	-0.257324	-0.0478516	-0.104004
-11.5	-0.278809	-0.0898438	-0.149902	0.09375	-0.258789	-0.0493164	-0.105469
-11.4	-0.292969	-0.0947266	-0.154785	0.0888672	-0.271484	-0.0463867	-0.110352
-11.3	-0.286621	-0.0883789	-0.160156	0.0952148	-0.265137	-0.0424805	-0.104004
-11.2	-0.288086	-0.0883789	-0.148438	0.0952148	-0.265137	-0.0517578	-0.104004
-11.1	-0.294434	-0.0883789	-0.160156	0.106934	-0.276855	-0.0517578	-0.104004
-11	-0.294434	-0.0883789	-0.160156	0.106934	-0.276855	-0.0517578	-0.104004
-10.9	-0.294434	-0.0883789	-0.167969	0.106934	-0.276855	-0.0400391	-0.115723
-10.8	-0.296875	-0.0898438	-0.167969	0.106934	-0.276855	-0.0400391	-0.115723
-10.7	-0.295898	-0.0859375	-0.157715	0.119629	-0.266602	-0.0297852	-0.105469
-10.6	-0.310059	-0.0908203	-0.164063	0.120117	-0.272949	-0.0375977	-0.111816
-10.5	-0.294434	-0.0766602	-0.15625	0.121094	-0.266602	-0.034668	-0.105469
-10.4	-0.294434	-0.0766602	-0.15625	0.130371	-0.271484	-0.0283203	-0.111816
-10.3	-0.292969	-0.0751953	-0.154785	0.131836	-0.263672	-0.0283203	-0.108887
-10.2	-0.296875	-0.0688477	-0.148438	0.138184	-0.257324	-0.0283203	-0.0961914
-10.1	-0.29834	-0.0820313	-0.157715	0.126465	-0.257324	-0.0283203	-0.0961914
-10	-0.29834	-0.0883789	-0.148438	0.126465	-0.257324	-0.0283203	-0.0961914
-9.9	-0.294434	-0.0766602	-0.136719	0.138184	-0.245605	-0.0166016	-0.0844727
-9.8	-0.286621	-0.0766602	-0.136719	0.138184	-0.245605	-0.0166016	-0.0859375
-9.7	-0.286621	-0.0766602	-0.136719	0.138184	-0.245605	-0.019043	-0.0986328
-9.6	-0.286621	-0.0766602	-0.13916	0.138184	-0.245605	-0.0283203	-0.0922852
-9.5	-0.278809	-0.0688477	-0.138184	0.145996	-0.237793	-0.0205078	-0.0844727
-9.4	-0.278809	-0.0688477	-0.117188	0.145996	-0.237793	-0.0205078	-0.0844727
-9.3	-0.278809	-0.0673828	-0.115723	0.138184	-0.235352	-0.0205078	-0.0844727
-9.2	-0.278809	-0.0610352	-0.121094	0.138184	-0.228516	-0.0322266	-0.0844727
-9.1	-0.278809	-0.0610352	-0.121094	0.145996	-0.237793	-0.0205078	-0.0844727
-9	-0.278809	-0.0610352	-0.109375	0.135742	-0.237793	-0.0205078	-0.0844727
-8.9	-0.255371	-0.0493164	-0.0976563	0.138184	-0.226074	-0.00878906	-0.0727539
-8.8	-0.255371	-0.0493164	-0.0976563	0.145996	-0.227539	-0.00878906	-0.0727539
-8.7	-0.25293	-0.0507813	-0.0991211	0.145996	-0.233887	-0.0205078	-0.0727539
-8.6	-0.243652	-0.0571289	-0.105469	0.145996	-0.233887	-0.00878906	-0.0727539
-8.5	-0.23584	-0.0478516	-0.0976563	0.15625	-0.226074	-0.000976563	-0.0766602
-8.4	-0.23584	-0.0415039	-0.0976563	0.165527	-0.226074	-0.000976563	-0.0766602
-8.3	-0.23584	-0.03125	-0.0859375	0.174805	-0.214355	0.00927734	-0.0649414
-8.2	-0.23584	-0.0375977	-0.0859375	0.177246	-0.214355	0.00292969	-0.0649414
-8.1	-0.237305	-0.0390625	-0.0898438	0.175781	-0.21582	-0.00878906	-0.0664063
-8	-0.243652	-0.0478516	-0.105469	0.169434	-0.222168	0.00146484	-0.0727539
-7.9	-0.243652	-0.0571289	-0.105469	0.169434	-0.224609	-0.00341797	-0.0805664
-7.8	-0.243652	-0.0571289	-0.105469	0.177246	-0.233887	0.00292969	-0.0805664
-7.7	-0.243652	-0.0649414	-0.105469	0.177246	-0.236328	0.00292969	-0.078125
-7.6	-0.246094	-0.0595703	-0.10791	0.174805	-0.248047	0.000488281	-0.0712891
-7.5	-0.255371	-0.0766602	-0.117188	0.167969	-0.258789	-0.00878906	-0.0791016
-7.4	-0.255371	-0.0766602	-0.117188	0.177246	-0.265137	-0.0102539	-0.0844727
-7.3	-0.247559	-0.0688477	-0.109375	0.185059	-0.257324	-0.00732422	-0.0766602
-7.2	-0.247559	-0.0610352	-0.109375	0.196777	-0.257324	-0.000976563	-0.0742188
-7.1	-0.247559	-0.0664063	-0.109375	0.196777	-0.257324	-0.000976563	-0.0649414
-7	-0.247559	-0.0571289	-0.109375	0.196777	-0.257324	-0.00244141	-0.0649414
-6.9	-0.247559	-0.0595703	-0.109375	0.20459	-0.257324	-0.00878906	-0.0649414
-6.8	-0.247559	-0.0688477	-0.109375	0.20459	-0.257324	-0.00732422	-0.0634766
-6.7	-0.23584	-0.0571289	-0.0952148	0.216309	-0.255859	0.0107422	-0.0454102
-6.6	-0.23584	-0.0571289	-0.0859375	0.216309	-0.24707	0.0107422	-0.0429688
-6.5	-0.23584	-0.0571289	-0.0859375	0.216309	-0.226074	0.0107422	-0.0336914
-6.4	-0.23584	-0.0493164	-0.0859375	0.228027	-0.226074	0.0107422	-0.0336914
-6.3	-0.224121	-0.0375977	-0.0742188	0.239746	-0.214355	0.0224609	-0.0219727
-6.2	-0.22168	-0.0375977	-0.0742188	0.237305	-0.214355	0.0224609	-0.0219727
-6.1	-0.224121	-0.0493164	-0.0766602	0.216309	-0.226074	0.0107422	-0.0415039
-6	-0.231934	-0.0493164	-0.0703125	0.21875	-0.226074	0.0107422	-0.0415039
-5.9	-0.224121	-0.0493164	-0.0703125	0.228027	-0.226074	0.0107422	-0.0415039
-5.8	-0.231934	-0.0571289	-0.0585938	0.228027	-0.226074	0.0131836	-0.0532227
-5.7	-0.220215	-0.0375977	-0.046875	0.239746	-0.214355	0.0341797	-0.0390625
-5.6	-0.21875	-0.0375977	-0.0444336	0.239746	-0.214355	0.0419922	-0.0297852
-5.5	-0.212402	-0.0375977	-0.0351563	0.239746	-0.214355	0.0395508	-0.0283203
-5.4	-0.212402	-0.0375977	-0.0375977	0.239746	-0.202637	0.0327148	-0.0219727
-5.3	-0.20459	-0.0297852	-0.0390625	0.247559	-0.206543	0.0419922	-0.0141602
-5.2	-0.20459	-0.0297852	-0.0390625	0.245117	-0.194824	0.0419922	-0.0258789
-5.1	-0.20459	-0.0297852	-0.0390625	0.23584	-0.194824	0.0419922	-0.0141602
-5	-0.195313	-0.0283203	-0.0297852	0.245117	-0.185547	0.0395508	-0.00488281
-4.9	-0.206055	-0.0375977	-0.0507813	0.23584	-0.197266	0.0302734	-0.0258789
-4.8	-0.224121	-0.0493164	-0.0507813	0.23584	-0.218262	0.0239258	-0.0234375
-4.7	-0.224121	-0.0493164	-0.0390625	0.234375	-0.218262	0.0302734	-0.0244141
-4.6	-0.224121	-0.0493164	-0.0390625	0.239746	-0.219727	0.0302734	-0.0336914
-4.5	-0.224121	-0.0493164	-0.0390625	0.239746	-0.226074	0.0302734	-0.0336914
-4.4	-0.224121	-0.0493164	-0.0390625	0.247559	-0.226074	0.0185547	-0.0336914
-4.3	-0.224121	-0.0493164	-0.0390625	0.245117	-0.226074	0.0302734	-0.0336914
-4.2	-0.226563	-0.0390625	-0.0390625	0.23584	-0.214355	0.0327148	-0.0454102
-4.1	-0.242676	-0.0429688	-0.0380859	0.238281	-0.211914	0.0444336	-0.03125
-4	-0.216309	-0.0361328	-0.0297852	0.253906	-0.189453	0.059082	-0.0258789
-3.9	-0.21875	-0.0336914	-0.0390625	0.247559	-0.19873	0.0498047	-0.0336914
-3.8	-0.224121	-0.0351563	-0.0273438	0.259277	-0.194824	0.0498047	-0.0219727
-3.7	-0.228027	-0.0180664	-0.03125	0.249023	-0.200195	0.0458984	-0.0258789
-3.6	-0.224121	-0.0166016	-0.0273438	0.255371	-0.193359	0.0498047	-0.0219727
-3.5	-0.226563	-0.0283203	-0.0375977	0.256836	-0.189453	0.0615234	-0.0244141
-3.4	-0.23584	-0.0415039	-0.0390625	0.23584	-0.19873	0.0693359	-0.0336914
-3.3	-0.238281	-0.0375977	-0.0390625	0.23584	-0.196289	0.059082	-0.0219727
-3.2	-0.247559	-0.0415039	-0.0366211	0.23584	-0.179199	0.0576172	-0.0258789
-3.1	-0.239746	-0.0297852	-0.0078125	0.243652	-0.155762	0.0795898	-0.0180664
-3	-0.231934	-0.0219727	0	0.251465	-0.123047	0.108398	-0.00634766
-2.9	-0.217773	-0.015625	0.0117188	0.255371	-0.120605	0.108398	0.00537109
-2.8	-0.196777	0.00537109	0.0258789	0.269531	-0.114258	0.122559	0.0195313
-2.7	-0.198242	0.0131836	0.0429688	0.285156	-0.0947266	0.139648	0.0351563
-2.6	-0.20459	0.00146484	0.0429688	0.264648	-0.0878906	0.131836	0.0146484
-2.5	-0.185059	0.0185547	0.0625	0.269531	-0.0893555	0.139648	0.0170898
-2.4	-0.185059	0.00146484	0.0664063	0.268555	-0.0791016	0.151367	0.0288086
-2.3	-0.1875	0.0078125	0.0717773	0.255371	-0.0800781	0.15918	0.0170898
-2.2	-0.182617	0.00146484	0.0625	0.259277	-0.0854492	0.170898	0.0288086
-2.1	-0.183594	0.00292969	0.0649414	0.259277	-0.0751953	0.174805	0.0288086
-2	-0.19043	-0.0102539	0.0795898	0.260742	-0.0776367	0.166992	0.0249023
-1.9	-0.175781	0.00537109	0.0898438	0.28125	-0.0620117	0.198242	0.0444336
-1.8	-0.149902	0.0234375	0.117188	0.295898	-0.0566406	0.209961	0.0678711
-1.7	-0.181152	0.0341797	0.101563	0.296875	-0.0854492	0.203613	0.0717773
-1.6	-0.178711	0.0415039	0.143066	0.308594	-0.0869141	0.220215	0.0639648
-1.5	-0.181152	0.0678711	0.174316	0.327148	-0.0620117	0.25293	0.0600586
-1.4	-0.17334	0.0874023	0.169434	0.333496	-0.0424805	0.28418	0.0678711
-1.3	-0.169434	0.0952148	0.140625	0.286621	-0.0229492	0.296875	0.0546875
-1.2	-0.137207	0.0834961	0.117188	0.283691	-0.0283203	0.310059	0.0703125
-1.1	-0.129883	0.0756836	0.105469	0.259766	-0.0410156	0.296387	0.0771484
-1	-0.116211	0.0615234	0.0927734	0.255371	-0.0463867	0.282715	0.106934
-0.9	-0.138184	0.0351563	0.0634766	0.242188	-0.0620117	0.264648	0.0810547
-0.8	-0.132813	0.0341797	0.0444336	0.237305	-0.107422	0.250488	0.0795898
-0.7	-0.137207	-0.00390625	0.0117188	0.208496	-0.149414	0.217773	0.0742188
-0.6	-0.134277	-0.00878906	-0.0141602	0.20459	-0.146484	0.174805	0.0600586
-0.5*	-0.144531*	-0.0205078*	-0.0727539*	0.15918*	-0.192383*	0.121582*	0.00439453*
-0.4*	-0.157715*	-0.0195313*	-0.0991211*	0.125*	-0.180176*	0.0668945*	0*
-0.3*	-0.15918*	-0.0375977*	-0.103027*	0.121094*	-0.189941*	0.0380859*	0*
-0.2*	-0.175781*	-0.0625*	-0.119629*	0.0668945*	-0.16748*	0.0146484*	-0.00488281*
-0.1*	-0.162109*	0*	-0.116211*	0*	-0.117188*	0*	-0.0688477*
0*	0*	0.126465*	0*	0.0678711*	0*	0.0966797*	0*
0.099999*	0.00244141*	0.0849609*	0*	0.065918*	-0.0449219*	0.151367*	0.081543*
0.200001*	-0.0620117*	0.0131836*	-0.0507813*	0.0991211*	-0.163574*	0.0991211*	0.117188*
0.299999*	-0.0717773*	-0.0219727*	-0.0566406*	0.114746*	-0.194824*	0.0830078*	0.151855*
0.400002*	-0.0927734*	-0.0512695*	-0.0917969*	0.0834961*	-0.175293*	0.0166016*	0.116699*
0.5*	-0.107422*	-0.105469*	-0.166504*	0.0791016*	-0.19873*	-0.0678711*	0.0615234*
0.599998*	-0.171387*	-0.117676*	-0.194336*	-0.0366211*	-0.208496*	-0.12793*	0.0209961*
0.700001*	-0.242188*	-0.127441*	-0.174316*	-0.0126953*	-0.200195*	-0.231445*	-0.0322266*
0.799999*	-0.234863*	-0.0273438*	-0.105469*	0.0375977*	-0.13623*	-0.244629*	-0.0625*
0.900002*	-0.179688*	-0.0664063*	-0.188965*	0.139648*	-0.183105*	-0.206543*	-0.0556641*
1*	-0.15918*	-0.0595703*	-0.240723*	0.247559*	-0.274414*	-0.12207*	-0.0517578*
1.1*	-0.253906*	-0.187012*	-0.352539*	0.0703125*	-0.516602*	-0.336426*	-0.0844727*
1.2*	-0.483398*	-0.305664*	-0.4375*	-0.350586*	-0.839355*	-0.700195*	-0.289063*
1.3*	-1.58203*	-0.987305*	-1.44824*	1.36865*	-1.51025*	0.723145*	-1.36963*
1.4*	-4.20459*	-2.04736*	-3.99512*	4.23389*	-2.60693*	6.25293*	-4.9165*
1.5*	-4.74512*	-1.86084*	-3.94434*	5.4541*	-0.233887*	12.6396*	0.242188*
1.6*	-1.79199*	0.331055*	-0.109375*	4.09277*	4.5874*	13.4277*	15.8735*
1.7*	1.20166*	1.93848*	2.53369*	2.73193*	5.40771*	7.13672*	23.7808*
1.8*	1.54834*	2.10205*	2.77734*	2.2334*	3.60303*	4.37549*	12.5313*
1.9*	2.02344*	2.13916*	2.875*	2.00684*	3.30078*	4.00439*	6.81738*
2	1.72021	1.85986	2.67188	2.03418	3.27051	4.43457	6.19727
2.1	1.44971	1.7832	2.48242	2.4082	3.5083	5.49951	7.55762
2.2	1.2876	1.49268	1.97266	2.64746	3.74951	6.7627	8.56152
2.3	0.905762	1.3501	1.91016	2.94922	4.17578	8.00244	9.43213
2.4	0.784668	1.20313	1.78076	3.34863	4.69727	9.24365	10.0391
2.5	0.873535	1.41846	2.1543	3.70654	5.00586	10.6611	11.1948
2.6	0.90332	1.42627	2.13525	4.23877	5.57227	11.6538	11.8169
2.7	0.519531	1.50781	1.94775	4.13281	6.14014	12.4849	12.0991
2.8	0.518066	1.56689	2.3374	4.38965	6.86035	13.3394	12.7925
2.9	0.703613	1.63623	2.42725	4.75732	7.35889	13.6167	13.4937
3	0.844238	1.76709	2.48438	5.12061	7.91064	13.9243	13.8804
3.1	0.972656	1.91162	2.73389	5.34668	8.59961	14.1021	14.2329
3.2	0.959473	1.99951	2.93945	5.62061	9.34473	14.4658	14.9429
3.3	0.896973	2.09668	3.05469	5.88037	9.99219	14.7476	15.042
3.4	0.9375	2.12891	3.16943	6.23584	10.7427	14.9458	15.4268
3.5	0.981445	2.22559	3.32275	6.59766	11.145	15.1431	15.7646
3.6	0.986816	2.27344	3.42432	6.89844	11.5767	15.2461	15.9253
3.7	1.10254	2.40771	3.57422	7.29834	12.0352	15.4639	16.1367
3.8	1.20703	2.521	3.70459	7.5874	12.4331	15.5474	16.3013
3.9	1.2915	2.60303	3.88428	7.83496	12.7388	15.6138	16.5107
4	1.38525	2.72412	4.0376	8.10693	12.9731	15.7202	16.6758
4.1	1.37744	2.81787	4.15088	8.375	13.1982	15.7778	16.7905
4.2	1.45557	2.91699	4.28662	8.63965	13.3887	15.8481	16.8677
4.3	1.33838	2.91553	4.4375	8.91553	13.541	15.938	16.9155
4.4	1.41797	2.88965	4.54053	9.22314	13.7051	15.8896	17.0146
4.5	1.44629	2.93359	4.68994	9.53125	13.7983	15.9248	17.1484
4.6	1.49854	2.97021	4.81787	9.76318	13.8652	15.9365	17.1904
4.7	1.53223	2.99609	4.92822	9.9165	13.9092	15.9897	17.2163
4.8	1.52881	3.01855	5.04053	10.1201	13.9185	16.0264	17.2241
4.9	1.49072	3.03027	5.15234	10.2593	13.9004	16.0142	17.3022
5	1.61035	3.17334	5.32275	10.542	14.0044	16.1304	17.4492
5.1	1.66504	3.24219	5.45703	10.7461	14.0615	16.1865	17.5366
5.2	1.68896	3.32471	5.59277	10.917	14.0815	16.2466	17.5566
5.3	1.75244	3.44531	5.75391	11.1577	14.1372	16.2427	17.5664
5.4	1.78613	3.54443	5.92432	11.3037	14.1724	16.2451	17.6226
5.5	1.81641	3.62646	6.06885	11.4712	14.2178	16.2397	17.6694
5.6	1.84326	3.7041	6.20313	11.6172	14.2529	16.2358	17.6875
5.7	1.87646	3.76758	6.34521	11.731	14.3003	16.2427	17.7295
5.8	1.93311	3.8501	6.49707	11.8335	14.3506	16.2803	17.7891
5.9	2.00391	3.9248	6.625	11.9336	14.3794	16.2998	17.835
6	2.05811	3.98828	6.75635	12.0273	14.3911	16.3101	17.8345
6.1	2.08105	4.03418	6.89111	12.1138	14.4058	16.3169	17.8403
6.2	2.12598	4.11621	7.03906	12.2163	14.4521	16.3857	17.896
6.3	2.18066	4.20947	7.18311	12.3218	14.5146	16.4351	17.957
6.4	2.19531	4.25293	7.29834	12.3765	14.5278	16.4639	17.9731
6.5	2.24707	4.32178	7.42578	12.4883	14.585	16.5264	18.0024
6.6	2.29541	4.37646	7.57813	12.5483	14.623	16.5718	18.0366
6.7	2.34473	4.43213	7.68213	12.5991	14.6553	16.5864	18.0483
6.8	2.35693	4.49658	7.79346	12.6514	14.6831	16.5981	18.0786
6.9	2.35254	4.54053	7.90869	12.6992	14.6763	16.6045	18.1133
7	2.36572	4.63428	8.01172	12.7881	14.6943	16.6318	18.1318
7.1	2.38135	4.70459	8.09375	12.8203	14.7153	16.6606	18.1616
7.2	2.40869	4.78125	8.2002	12.8647	14.731	16.6758	18.1953
7.3	2.39844	4.83105	8.28564	12.8584	14.7129	16.6919	18.1841
7.4	2.43066	4.87109	8.37744	12.8633	14.7241	16.7061	18.1807
7.5	2.45459	4.9209	8.4585	12.8584	14.7236	16.6958	18.1802
7.6	2.47461	4.98047	8.54932	12.8984	14.7217	16.6875	18.1953
7.7	2.51563	5.04199	8.64209	12.939	14.731	16.7036	18.2202
7.8	2.52588	5.09912	8.72119	12.9766	14.7178	16.7139	18.2319
7.9	2.55322	5.14209	8.80078	12.9873	14.7026	16.6826	18.1982
8	2.61182	5.21484	8.88525	13.0288	14.7256	16.7231	18.228
8.1	2.6665	5.26318	8.97949	13.0288	14.7583	16.7476	18.2412
8.2	2.70557	5.32568	9.06104	13.0703	14.8115	16.7388	18.2681
8.3	2.73828	5.3623	9.12646	13.0786	14.8027	16.749	18.3052
8.4	2.78369	5.42334	9.2085	13.1055	14.8457	16.7607	18.3218
8.5	2.79004	5.47021	9.25488	13.1162	14.8506	16.7725	18.3257
8.6	2.83984	5.5498	9.34521	13.1641	14.8691	16.8169	18.3452
8.7	2.87598	5.60938	9.42188	13.1865	14.8521	16.8179	18.3687
8.8	2.88525	5.66162	9.50244	13.2095	14.8677	16.8335	18.3789
8.9	2.9165	5.70459	9.56396	13.2217	14.8755	16.8232	18.3804
9	2.96631	5.78271	9.62109	13.2451	14.8833	16.8638	18.4077
9.1	2.9502	5.81152	9.65869	13.2148	14.8623	16.8545	18.3999
9.2	2.95557	5.84766	9.71484	13.1865	14.8652	16.8428	18.4287
9.3	2.97754	5.89746	9.74609	13.1929	14.8584	16.8647	18.4102
9.4	3.01416	5.9585	9.79297	13.2241	14.8745	16.8809	18.4077
9.5	3.04541	6.02344	9.84766	13.2305	14.874	16.8945	18.4287
9.6	3.08057	6.07568	9.92578	13.249	14.895	16.9238	18.4233
9.7	3.1001	6.10693	9.96094	13.2227	14.9224	16.9351	18.4233
9.8	3.11572	6.13428	10.0156	13.2476	14.9341	16.9404	18.4194
9.9	3.13672	6.17334	10.0493	13.25	14.9536	16.9663	18.4336
10	3.1626	6.22559	10.0928	13.2778	15.002	16.9834	18.4521
10.1	3.17676	6.27881	10.1367	13.2827	15.0225	16.998	18.4702
10.2	3.22656	6.34912	10.1719	13.3047	15.063	17.0054	18.5156
10.3	3.28467	6.4126	10.2002	13.3179	15.0928	17.0093	18.4951
10.4	3.2915	6.44824	10.1943	13.3022	15.0669	16.9834	18.4883
10.5	3.36865	6.53174	10.2593	13.3442	15.1143	17.0308	18.5396
10.6	3.39697	6.5625	10.2813	13.3359	15.124	17.0093	18.5586
10.7	3.45166	6.6084	10.2852	13.3413	15.1177	17.0122	18.5835
10.8	3.46582	6.63135	10.2822	13.3398	15.085	16.9883	18.5796
10.9	3.51416	6.6709	10.3037	13.3364	15.1138	17.0083	18.5874
11	3.52588	6.69531	10.2891	13.3345	15.106	16.9976	18.585
11.1	3.56494	6.75146	10.272	13.3491	15.1021	17.0005	18.6133
11.2	3.58594	6.78809	10.2905	13.3481	15.0918	16.9912	18.6372
11.3	3.61279	6.82178	10.3125	13.3657	15.1021	17.0186	18.6563
11.4	3.59619	6.84375	10.293	13.353	15.0942	16.9951	18.686
11.5	3.625	6.88818	10.311	13.3662	15.1294	17.0005	18.7124
11.6	3.63672	6.89111	10.3115	13.3687	15.1113	16.999	18.7168
11.7	3.68457	6.92041	10.3398	13.3765	15.124	17.0249	18.6953
11.8	3.70703	6.97314	10.3633	13.4038	15.1738	17.0552	18.7202
11.9	3.72363	6.98047	10.3594	13.4063	15.1514	17.0381	18.7241
12	3.74561	7.00244	10.354	13.3999	15.1475	17.0522	18.7173
12.1	3.76709	7.02393	10.4141	13.3975	15.1416	17.0684	18.7271
12.2	3.76416	7.05225	10.4336	13.3882	15.1538	17.0898	18.75
12.3	3.78516	7.08105	10.4336	13.4248	15.1763	17.1123	18.7764
12.4	3.81201	7.1001	10.4438	13.4219	15.1865	17.1396	18.7632
12.5	3.83447	7.11084	10.4727	13.4141	15.2012	17.1396	18.7446
12.6	3.86719	7.12402	10.5054	13.4067	15.1841	17.1592	18.7583
12.7	3.87207	7.16406	10.5039	13.396	15.1528	17.1709	18.7578
12.8	3.87988	7.19287	10.5142	13.4048	15.1475	17.1616	18.7656
12.9	3.90625	7.21094	10.5405	13.4194	15.1738	17.1631	18.7905
13	3.93506	7.24805	10.5625	13.4302	15.1973	17.1738	18.7896
13.1	3.93311	7.29297	10.5767	13.4155	15.2036	17.1787	18.7891
13.2	3.94531	7.32959	10.5601	13.396	15.2271	17.1577	18.7842
13.3	3.97656	7.37256	10.5781	13.417	15.2271	17.1646	18.7905
13.4	4.01514	7.40479	10.6338	13.4268	15.2554	17.1694	18.8188
13.5	4.03516	7.43408	10.6538	13.4224	15.2651	17.1592	18.8311
13.6	4.06738	7.47656	10.6836	13.4478	15.2842	17.1724	18.8516
13.7	4.11572	7.54297	10.6821	13.46	15.3013	17.1875	18.8687
13.8	4.13379	7.57324	10.7007	13.4858	15.3232	17.1904	18.8765
13.9	4.13818	7.5835	10.6875	13.4702	15.3262	17.1841	18.8804
14	4.18457	7.63037	10.7056	13.5078	15.3521	17.1929	18.8906
14.1	4.19385	7.66943	10.7358	13.5186	15.3716	17.2192	18.9277
14.2	4.22656	7.68359	10.75	13.5273	15.374	17.2295	18.9453
14.3	4.26123	7.71387	10.7837	13.5586	15.3833	17.2515	18.9766
14.4	4.2876	7.73193	10.8022	13.5693	15.4067	17.27	18.9961
14.5	4.3291	7.77344	10.8135	13.5781	15.395	17.2803	19.0107
14.6	4.35059	7.80371	10.8154	13.6006	15.4043	17.2803	19.0107
14.7	4.36572	7.8335	10.8125	13.6069	15.4043	17.3013	19.0249
14.8	4.38379	7.85303	10.8242	13.6382	15.4316	17.3115	19.0352
14.9	4.3877	7.88281	10.832	13.6499	15.4248	17.3193	19.0381
15	4.40625	7.92334	10.8359	13.6577	15.4443	17.3389	19.064
15.1	4.40723	7.9375	10.8359	13.6719	15.4536	17.3389	19.0586
15.2	4.42432	7.95605	10.854	13.6929	15.4834	17.3491	19.0781
15.3	4.44775	7.97266	10.8672	13.7085	15.5059	17.3818	19.0991
15.4	4.45557	7.9873	10.8711	13.7202	15.4927	17.3882	19.1108
15.5	4.44629	7.98193	10.8281	13.6992	15.4741	17.3833	19.1016
15.6	4.45947	7.99219	10.8438	13.7124	15.4746	17.3999	19.1226
15.7	4.45313	7.99268	10.8296	13.7051	15.4629	17.3989	19.1152
15.8	4.45703	8.01025	10.8345	13.7251	15.4678	17.4014	19.1172
15.9	4.45557	8.01611	10.8242	13.7202	15.4824	17.3936	19.1289
16	4.48682	8.03125	10.8359	13.7397	15.4849	17.4131	19.1499
16.1	4.49316	8.03271	10.8296	13.7437	15.4888	17.4312	19.1563
16.2	4.50391	8.02881	10.8164	13.7373	15.4927	17.4277	19.1465
16.3	4.49707	8.01465	10.7969	13.728	15.4863	17.4038	19.1392
16.4	4.52344	8.01855	10.8164	13.7217	15.4902	17.416	19.1606
16.5	4.52441	8.00244	10.8125	13.7173	15.4819	17.3906	19.1587
16.6	4.52588	8.01318	10.8125	13.7202	15.4731	17.3989	19.1553
16.7	4.54541	8.01074	10.8125	13.7256	15.4824	17.3882	19.1563
16.8	4.5625	8.01855	10.8179	13.7139	15.4888	17.3989	19.1748
16.9	4.55811	8.02441	10.8135	13.7173	15.4873	17.3999	19.1782
17	4.56543	8.03174	10.8115	13.7178	15.48	17.4004	19.1777
17.1	4.57275	8.021	10.7813	13.7061	15.4614	17.3755	19.1733
17.2	4.57275	8.01465	10.7671	13.6968	15.4614	17.3569	19.1655
17.3	4.604	8.02881	10.7813	13.6968	15.481	17.3506	19.1851
17.4	4.62207	8.02734	10.7783	13.6953	15.4795	17.3545	19.1836
17.5	4.63525	8.03271	10.793	13.7075	15.4927	17.3506	19.189
17.6	4.63379	8.03125	10.793	13.6914	15.5029	17.3569	19.1968
17.7	4.64697	8.04443	10.8008	13.6968	15.5137	17.3677	19.2163
17.8	4.66406	8.0498	10.8242	13.6968	15.5122	17.3818	19.2163
17.9	4.66016	8.03955	10.8296	13.6943	15.5098	17.373	19.2139
18	4.68994	8.0625	10.8462	13.6992	15.5342	17.3804	19.2383
18.1	4.71582	8.06006	10.853	13.7046	15.541	17.3896	19.2476
18.2	4.72754	8.07031	10.8618	13.707	15.5225	17.3882	19.2397
18.3	4.73828	8.07422	10.8711	13.71	15.5293	17.3872	19.2476
18.4	4.75635	8.07471	10.875	13.7163	15.5161	17.3818	19.2476
18.5	4.77588	8.08984	10.875	13.7188	15.5225	17.3882	19.2461
18.6	4.78369	8.09131	10.8711	13.7163	15.541	17.3896	19.2476
18.7	4.79297	8.09521	10.8623	13.7061	15.541	17.3911	19.2505
18.8	4.79785	8.10449	10.8696	13.6997	15.5317	17.3833	19.2476
18.9	4.81885	8.12354	10.8774	13.7002	15.542	17.4023	19.2617
19	4.84863	8.13428	10.9023	13.7256	15.5552	17.4014	19.2788
19.1	4.86328	8.14502	10.8921	13.7139	15.5527	17.4106	19.2764
19.2	4.86426	8.14844	10.8931	13.7148	15.5513	17.4014	19.2656
19.3	4.87891	8.16406	10.9023	13.728	15.5435	17.4209	19.2671
19.4	4.89307	8.18652	10.9155	13.728	15.5513	17.4233	19.2803
19.5	4.91797	8.19287	10.9336	13.7295	15.5654	17.4419	19.2866
19.6	4.93213	8.19434	10.9414	13.7476	15.5723	17.46	19.2866
19.7	4.95654	8.21875	10.9531	13.7539	15.5747	17.4702	19.2969
19.8	4.96729	8.21484	10.9531	13.7607	15.5747	17.4653	19.292
19.9	4.97656	8.2334	10.9634	13.7632	15.585	17.4678	19.2944
20	4.99316	8.24072	10.9805	13.7734	15.5981	17.478	19.3071
20.1	5.01709	8.25439	10.9961	13.7764	15.584	17.481	19.3208
20.2	5.01416	8.25293	11.0029	13.7788	15.5864	17.4731	19.3179
20.3	5.03223	8.25244	10.9985	13.7773	15.5942	17.478	19.3164
20.4	5.03613	8.2749	11	13.7881	15.6045	17.4717	19.3193
20.5	5.05078	8.27637	11.0063	13.7983	15.6113	17.4741	19.3257
20.6	5.06348	8.28369	11.0142	13.7993	15.6123	17.4912	19.3359
20.7	5.06641	8.28418	11.0068	13.7988	15.6167	17.4927	19.3179
20.8	5.07813	8.28418	11.0195	13.7944	15.6216	17.5005	19.3389
20.9	5.09473	8.29199	11.0249	13.7969	15.6216	17.499	19.3452
21	5.104	8.2915	11.0322	13.8179	15.6123	17.5078	19.3452
21.1	5.11572	8.2959	11.043	13.8062	15.6074	17.5137	19.3594
21.2	5.12744	8.2915	11.0337	13.8047	15.5991	17.5171	19.3594
21.3	5.12354	8.30127	11.0317	13.8037	15.5815	17.5161	19.3545
21.4	5.13525	8.3125	11.0337	13.8062	15.5942	17.5093	19.3506
21.5	5.1377	8.31641	11.0439	13.811	15.603	17.5313	19.3579
21.6	5.16406	8.33105	11.042	13.8286	15.6035	17.5527	19.3677
21.7	5.15479	8.32324	11.0313	13.8374	15.5957	17.5498	19.3647
21.8	5.17822	8.34131	11.043	13.8491	15.6138	17.5732	19.3789
21.9	5.16113	8.33057	11.0376	13.8438	15.6084	17.5771	19.396
22	5.16406	8.33252	11.0405	13.8364	15.6011	17.5747	19.396
22.1	5.1665	8.34229	11.0439	13.8408	15.6226	17.5845	19.4102
22.2	5.1665	8.33643	11.0435	13.8506	15.6138	17.6011	19.417
22.3	5.1665	8.33594	11.0337	13.8428	15.627	17.5835	19.4092
22.4	5.17432	8.35156	11.0415	13.8452	15.6421	17.6069	19.4165
22.5	5.17432	8.33496	11.0352	13.8374	15.645	17.606	19.4209
22.6	5.17725	8.35303	11.0264	13.8374	15.6455	17.6099	19.4248
22.7	5.19092	8.35547	11.0322	13.8398	15.6328	17.5977	19.4258
22.8	5.18604	8.35059	11.0342	13.8467	15.6401	17.5981	19.4326
22.9	5.1875	8.34521	11.0337	13.8281	15.6357	17.5942	19.418
23	5.21582	8.36084	11.0508	13.8467	15.6528	17.5967	19.4365
23.1	5.21582	8.36328	11.0454	13.8555	15.6475	17.6094	19.4463
23.2	5.23438	8.37646	11.064	13.8804	15.6543	17.6216	19.4614
23.3	5.24609	8.38574	11.0508	13.8765	15.6543	17.6216	19.4546
23.4	5.25488	8.38281	11.0444	13.8726	15.6631	17.6421	19.4468
23.5	5.2627	8.39209	11.0518	13.8882	15.6646	17.6382	19.4468
23.6	5.25781	8.40137	11.064	13.896	15.6841	17.6514	19.4507
23.7	5.2627	8.40088	11.0688	13.8882	15.6724	17.6396	19.4648
23.8	5.26807	8.41455	11.064	13.8975	15.6816	17.6528	19.4585
23.9	5.26953	8.42188	11.064	13.8984	15.6826	17.6514	19.46
24	5.27441	8.42188	11.0713	13.9077	15.6841	17.6499	19.4556
24.1	5.2749	8.42236	11.0718	13.9014	15.7012	17.6504	19.4692
24.2	5.25342	8.39844	11.0547	13.8906	15.6826	17.6396	19.4468
24.3	5.25781	8.40527	11.0649	13.9102	15.6855	17.6592	19.457
24.4	5.26514	8.41016	11.0742	13.9194	15.6904	17.6577	19.457
24.5	5.26709	8.40381	11.0718	13.917	15.6841	17.6372	19.4497
24.6	5.26563	8.41309	11.0718	13.9053	15.7036	17.6396	19.4453
24.7	5.28467	8.42432	11.083	13.9258	15.7153	17.6514	19.4585
24.8	5.29688	8.42334	11.0952	13.9312	15.7231	17.6592	19.4678
24.9	5.29395	8.4248	11.0898	13.9351	15.7231	17.6616	19.4766
25	5.30713	8.42188	11.0923	13.936	15.7256	17.6694	19.4766
25.1	5.31494	8.42236	11.1133	13.938	15.7402	17.6621	19.4771
25.2	5.31494	8.42041	11.125	13.9468	15.7466	17.6553	19.4868
25.3	5.33447	8.43506	11.1445	13.9609	15.7544	17.6616	19.5029
25.4	5.3374	8.43408	11.1343	13.9575	15.7456	17.6685	19.4951
25.5	5.33154	8.43115	11.1509	13.9634	15.7397	17.6592	19.4937
25.6	5.34766	8.44531	11.146	13.978	15.7544	17.6709	19.5
25.7	5.34717	8.45313	11.1533	13.9702	15.7466	17.6694	19.4976
25.8	5.35693	8.44189	11.1553	13.9756	15.7559	17.6621	19.4976
25.9	5.34326	8.43359	11.1509	13.9663	15.7529	17.668	19.4976
26	5.34521	8.44287	11.1421	13.9663	15.7544	17.6699	19.5068
26.1	5.35498	8.44287	11.1641	13.978	15.7544	17.6772	19.5156
26.2	5.36475	8.45068	11.1602	13.9741	15.7598	17.6787	19.5054
26.3	5.35254	8.44287	11.1587	13.978	15.749	17.6685	19.4951
26.4	5.35547	8.46387	11.1655	13.9976	15.7676	17.6812	19.5078
26.5	5.35498	8.46338	11.1548	13.9858	15.7749	17.6904	19.5093
26.6	5.36475	8.47314	11.1694	13.9937	15.7847	17.6904	19.5171
26.7	5.3667	8.46875	11.1611	13.9976	15.7803	17.7007	19.5171
26.8	5.38818	8.47559	11.1865	14.0171	15.7949	17.7012	19.5288
26.9	5.37988	8.48828	11.1782	14.0156	15.7935	17.6968	19.5249
27	5.37744	8.48291	11.1743	14.0093	15.792	17.7021	19.5366
27.1	5.36572	8.48486	11.1631	14.0093	15.7856	17.71	19.5366
27.2	5.36572	8.48584	11.165	14.0093	15.7832	17.7202	19.5483
27.3	5.36572	8.47949	11.1748	13.9966	15.7739	17.7129	19.5562
27.4	5.37744	8.48291	11.1836	14.0063	15.7803	17.7188	19.5679
27.5	5.37354	8.48096	11.1797	13.9966	15.7729	17.7183	19.5615
27.6	5.38525	8.48047	11.1914	13.9946	15.7632	17.707	19.5586
27.7	5.38428	8.46143	11.1797	13.9966	15.7637	17.7075	19.5679
27.8	5.38232	8.46729	11.1914	14.0063	15.7622	17.71	19.5757
27.9	5.39697	8.47412	11.1899	13.999	15.7646	17.7109	19.5898
28	5.39697	8.48193	11.1836	13.999	15.7559	17.7246	19.6084
28.1	5.40332	8.48193	11.1836	14.0039	15.7451	17.7163	19.5898
28.2	5.396	8.4834	11.1904	14.0068	15.7534	17.7012	19.606
28.3	5.39551	8.49219	11.1807	14.0063	15.7412	17.6968	19.6079
28.4	5.39453	8.49219	11.1914	14.0068	15.7451	17.7007	19.6084
28.5	5.3877	8.4873	11.1772	13.9976	15.7378	17.6958	19.6016
28.6	5.40381	8.50049	11.1914	14.0186	15.7505	17.7178	19.6177
28.7	5.41357	8.51025	11.1797	14.0234	15.7529	17.7178	19.6235
28.8	5.41797	8.51709	11.1836	14.0186	15.7739	17.7319	19.6421
28.9	5.42529	8.53125	11.2119	14.0234	15.7739	17.7412	19.6577
29	5.41553	8.51465	11.2139	14.0171	15.7739	17.7466	19.6592
29.1	5.41016	8.51855	11.2085	14.0171	15.7715	17.7466	19.6631
29.2	5.39404	8.50244	11.1924	14.0093	15.7544	17.728	19.647
29.3	5.396	8.50439	11.2061	14.0068	15.7622	17.7349	19.6489
29.4	5.3916	8.5	11.2017	13.9961	15.7715	17.7451	19.6445
29.5	5.39697	8.49365	11.2031	13.9897	15.7632	17.7295	19.6523
29.6	5.40576	8.50391	11.2095	14.0054	15.7739	17.75	19.6694
29.7	5.40771	8.51221	11.2046	14.0029	15.7832	17.752	19.6577
29.8	5.41357	8.50244	11.2227	13.9946	15.7749	17.7578	19.6577
29.9	5.41553	8.51465	11.2227	13.9966	15.7769	17.7598	19.6592
30	5.4126	8.51318	11.2134	13.9946	15.7817	17.7578	19.6655
30.1	5.4126	8.51172	11.2188	13.9927	15.7803	17.7583	19.6641
30.2	5.4126	8.50439	11.2046	13.9741	15.7847	17.7583	19.6567
30.3	5.41504	8.50244	11.2109	13.9883	15.7905	17.7373	19.6548
30.4	5.42188	8.50439	11.2109	13.9849	15.7925	17.749	19.6567
30.5	5.41504	8.50146	11.2109	13.9946	15.7905	17.7476	19.6665
30.6	5.42188	8.5	11.2227	13.9951	15.7896	17.7388	19.6694
30.7	5.41504	8.49365	11.2236	13.9868	15.7856	17.7305	19.6694
30.8	5.42432	8.49365	11.228	13.9888	15.7871	17.7324	19.6709
30.9	5.42676	8.48438	11.2344	13.9883	15.7935	17.7383	19.6782
31	5.43506	8.49268	11.2358	13.9976	15.7935	17.7402	19.6802
31.1	5.43457	8.49072	11.2407	13.9976	15.792	17.7373	19.6797
31.2	5.44238	8.49121	11.2344	13.9951	15.7832	17.7358	19.6865
31.3	5.44922	8.49609	11.2554	14	15.7881	17.7544	19.6914
31.4	5.45557	8.50293	11.2603	14.0068	15.7949	17.7593	19.6982
31.5	5.45459	8.4834	11.2554	13.9976	15.7847	17.752	19.689
31.6	5.45264	8.48975	11.2617	13.9976	15.7827	17.7515	19.6914
31.7	5.46582	8.49854	11.272	14.0063	15.8013	17.7813	19.6968
31.8	5.47412	8.49512	11.2813	14.0083	15.8013	17.7832	19.6968
31.9	5.47217	8.50146	11.2813	14.0063	15.8013	17.7788	19.7085
32	5.47412	8.50146	11.2813	14.0083	15.7988	17.7739	19.7085
32.1	5.47363	8.50146	11.2813	14.0054	15.792	17.7803	19.6968
32.2	5.479	8.50146	11.2813	14.0039	15.8115	17.7788	19.6968
32.3	5.46484	8.49902	11.2788	13.9966	15.8042	17.7715	19.6958
32.4	5.48291	8.50391	11.2837	14.0142	15.8247	17.7813	19.7056
32.5	5.47217	8.5	11.2813	13.9976	15.814	17.7803	19.6968
32.6	5.48828	8.50684	11.293	14.0146	15.8301	17.792	19.7085
32.7	5.49219	8.50928	11.293	14.0054	15.8418	17.7896	19.7061
32.8	5.48682	8.49756	11.2944	14.0068	15.835	17.7817	19.6992
32.9	5.50342	8.51318	11.3032	14.0259	15.8584	17.7891	19.7085
33	5.50781	8.51318	11.3125	14.0264	15.8667	17.791	19.7061
33.1	5.5166	8.51318	11.3125	14.0171	15.8726	17.8008	19.7109
33.2	5.5249	8.51465	11.3115	14.0186	15.8745	17.8105	19.7192
33.3	5.53369	8.51953	11.3188	14.0234	15.8701	17.8062	19.7148
33.4	5.53467	8.51318	11.3125	14.0288	15.8755	17.7998	19.7109
33.5	5.5376	8.51563	11.3135	14.0298	15.8755	17.8008	19.7202
33.6	5.53906	8.52393	11.3154	14.0317	15.8833	17.8145	19.7202
33.7	5.5415	8.52734	11.311	14.0366	15.8809	17.8169	19.7256
33.8	5.5376	8.51709	11.314	14.0381	15.8857	17.8101	19.7188
33.9	5.55078	8.53662	11.3188	14.0547	15.8926	17.8286	19.7256
34	5.54248	8.52344	11.3032	14.0366	15.8804	17.8086	19.7046
34.1	5.54932	8.53418	11.3232	14.0469	15.8965	17.8208	19.7085
34.2	5.57031	8.53906	11.3188	14.0562	15.9004	17.8257	19.7227
34.3	5.56348	8.53418	11.3242	14.0693	15.9053	17.8208	19.7295
34.4	5.57666	8.54443	11.3281	14.0664	15.9028	17.8154	19.7266
34.5	5.57813	8.54688	11.3281	14.0718	15.8965	17.813	19.7217
34.6	5.58301	8.56152	11.3413	14.0967	15.9014	17.8179	19.7358
34.7	5.59229	8.56543	11.3345	14.0898	15.8965	17.8247	19.7383
34.8	5.60547	8.57031	11.3413	14.106	15.9131	17.8374	19.7451
34.9	5.60498	8.57178	11.3462	14.0884	15.9121	17.8311	19.7383
35	5.60693	8.57178	11.353	14.0981	15.9146	17.8506	19.7476
35.1	5.59229	8.5625	11.3423	14.0845	15.9028	17.8389	19.7476
35.2	5.58545	8.57568	11.3438	14.0938	15.896	17.8491	19.7422
35.3	5.60156	8.57568	11.3633	14.1099	15.9058	17.8535	19.7505
35.4	5.60254	8.5835	11.3516	14.0962	15.9038	17.8477	19.7446
35.5	5.59766	8.5835	11.3633	14.1099	15.9058	17.8613	19.7607
35.6	5.61572	8.5835	11.3711	14.1055	15.9116	17.8711	19.7671
35.7	5.61426	8.59521	11.3696	14.1069	15.9238	17.8794	19.7656
35.8	5.60938	8.59668	11.3687	14.1006	15.9224	17.8765	19.7632
35.9	5.60156	8.60303	11.3608	14.1069	15.9253	17.8809	19.7661
36	5.60645	8.61084	11.3516	14.1147	15.9312	17.8882	19.7759
36.1	5.61572	8.61182	11.3643	14.1274	15.9458	17.8896	19.7788
36.2	5.62354	8.61621	11.3623	14.1177	15.9341	17.8896	19.7778
36.3	5.61572	8.61475	11.3657	14.1211	15.9341	17.8999	19.7681
36.4	5.62891	8.62402	11.3828	14.1279	15.9355	17.9043	19.7803
36.5	5.62988	8.62891	11.3828	14.1172	15.9429	17.8975	19.7866
36.6	5.62744	8.62646	11.3828	14.1421	15.9551	17.9116	19.7969
36.7	5.64307	8.63965	11.3726	14.1553	15.9629	17.9185	19.7983
36.8	5.63672	8.64209	11.3633	14.146	15.9536	17.9209	19.7974
36.9	5.65479	8.64453	11.3711	14.1577	15.9653	17.9194	19.8086
37	5.64404	8.65381	11.3721	14.1548	15.96	17.9209	19.8071
37.1	5.65479	8.66016	11.3921	14.1694	15.9639	17.9287	19.8154
37.2	5.65625	8.64746	11.3882	14.1606	15.9683	17.9121	19.7983
37.3	5.64941	8.65381	11.3892	14.1563	15.9546	17.9102	19.7983
37.4	5.66553	8.66309	11.396	14.1772	15.9619	17.9199	19.8091
37.5	5.65088	8.65625	11.397	14.1631	15.9482	17.9155	19.7944
37.6	5.65186	8.66162	11.4023	14.1665	15.9497	17.917	19.8032
37.7	5.65625	8.66162	11.3999	14.167	15.9536	17.9194	19.8076
37.8	5.63525	8.66162	11.3804	14.1475	15.959	17.9082	19.7959
37.9	5.63525	8.66162	11.3916	14.1655	15.9443	17.9102	19.8071
38	5.64941	8.66406	11.4023	14.1665	15.9663	17.9248	19.8101
38.1	5.646	8.67236	11.4141	14.1685	15.9644	17.9199	19.8062
38.2	5.65186	8.67041	11.4219	14.1665	15.9741	17.9297	19.8179
38.3	5.646	8.6748	11.4219	14.1685	15.9619	17.9185	19.8076
38.4	5.64941	8.69043	11.4312	14.1641	15.96	17.9209	19.8242
38.5	5.64697	8.68213	11.4204	14.1616	15.9521	17.9209	19.8218
38.6	5.63672	8.67236	11.4038	14.145	15.9331	17.9092	19.7974
38.7	5.63623	8.67188	11.4126	14.147	15.9365	17.9131	19.7954
38.8	5.64453	8.67969	11.4023	14.146	15.938	17.9067	19.7959
38.9	5.64063	8.68408	11.4131	14.1567	15.9331	17.9092	19.7944
39	5.62598	8.68213	11.4229	14.1548	15.9312	17.9116	19.7866
39.1	5.63379	8.68506	11.4219	14.1577	15.9341	17.9194	19.7891
39.2	5.62891	8.68652	11.4312	14.1514	15.9341	17.9043	19.7983
39.3	5.63525	8.69287	11.436	14.1665	15.9365	17.9102	19.7983
39.4	5.63672	8.69287	11.4507	14.1802	15.9448	17.9121	19.8052
39.5	5.64551	8.70215	11.4531	14.168	15.9443	17.917	19.8047
39.6	5.63525	8.68359	11.4531	14.1577	15.9365	17.9014	19.8008
39.7	5.65332	8.69922	11.4517	14.167	15.9551	17.9077	19.8154
39.8	5.66016	8.70605	11.4663	14.168	15.9536	17.9224	19.8203
39.9	5.65625	8.70459	11.4727	14.1685	15.9473	17.9092	19.8169
40	5.67432	8.7124	11.4868	14.1743	15.9731	17.9209	19.8164
40.1	5.68311	8.71484	11.4922	14.1772	15.9702	17.918	19.8267
40.2	5.68896	8.72314	11.4844	14.1694	15.9746	17.9238	19.8286
40.3	5.69482	8.72119	11.5039	14.189	15.9771	17.9297	19.8384
40.4	5.70459	8.72314	11.5015	14.189	15.9731	17.9316	19.8403
40.5	5.69238	8.71094	11.4819	14.1865	15.9629	17.9287	19.835
40.6	5.68604	8.71484	11.4814	14.1836	15.9521	17.9116	19.8267
40.7	5.69385	8.72314	11.5054	14.1763	15.9668	17.9316	19.8389
40.8	5.68604	8.70947	11.5039	14.1665	15.96	17.918	19.8257
40.9	5.69385	8.72168	11.5103	14.1748	15.9629	17.9302	19.8438
41	5.69531	8.70313	11.5132	14.1694	15.9497	17.9116	19.8389
41.1	5.7041	8.71387	11.521	14.1851	15.9521	17.9302	19.8438
41.2	5.69238	8.70068	11.5088	14.1655	15.9458	17.9092	19.8374
41.3	5.67969	8.70459	11.5146	14.1772	15.9448	17.9131	19.8311
41.4	5.68359	8.69824	11.5181	14.1616	15.9482	17.9092	19.8359
41.5	5.67676	8.69385	11.5156	14.1523	15.9482	17.9209	19.8296
41.6	5.68457	8.70459	11.5103	14.1553	15.9512	17.9194	19.8271
41.7	5.6875	8.70605	11.4937	14.146	15.9536	17.9224	19.8281
41.8	5.68506	8.7124	11.5039	14.1577	15.9551	17.9404	19.8364
41.9	5.70264	8.73193	11.5234	14.1577	15.9717	17.96	19.8462
42	5.69531	8.72266	11.5195	14.1553	15.9521	17.9507	19.8374
42.1	5.69629	8.72559	11.5078	14.1367	15.9448	17.9419	19.8389
42.2	5.7251	8.73975	11.5298	14.1641	15.9429	17.96	19.8672
42.3	5.71191	8.73047	11.5234	14.1475	15.9316	17.9585	19.8672
42.4	5.70703	8.72705	11.5132	14.1382	15.9341	17.9653	19.8599
42.5	5.69775	8.72119	11.5039	14.1382	15.9341	17.9702	19.8569
42.6	5.69287	8.72559	11.5093	14.1343	15.9316	17.959	19.853
42.7	5.70264	8.73193	11.5063	14.1382	15.9248	17.9609	19.8569
42.8	5.70166	8.71875	11.5093	14.1382	15.9326	17.9575	19.8555
42.9	5.67969	8.71777	11.5063	14.1396	15.9395	17.9521	19.8506
43	5.68457	8.72021	11.5117	14.147	15.9419	17.9585	19.8594
43.1	5.69775	8.72168	11.5156	14.1489	15.9458	17.9551	19.8662
43.2	5.70557	8.72119	11.5156	14.1587	15.9536	17.9585	19.8696
43.3	5.70557	8.72559	11.5117	14.1489	15.9653	17.96	19.8677
43.4	5.71973	8.74365	11.5259	14.168	15.9731	17.9575	19.8789
43.5	5.72412	8.73975	11.5225	14.1631	15.9731	17.9482	19.8936
43.6	5.7251	8.74365	11.5298	14.146	15.9731	17.9482	19.8906
43.7	5.71973	8.73828	11.521	14.1445	15.9692	17.9468	19.8936
43.8	5.72119	8.72559	11.5063	14.1396	15.9551	17.9419	19.8906
43.9	5.73047	8.72949	11.5093	14.1421	15.9692	17.9468	19.8936
44	5.72217	8.729	11.5127	14.1367	15.9624	17.96	19.897
44.1	5.72803	8.73486	11.5146	14.1357	15.9668	17.9639	19.8911
44.2	5.72607	8.72119	11.5127	14.1274	15.9536	17.9521	19.8867
44.3	5.72021	8.72949	11.5146	14.1294	15.9565	17.9512	19.8975
44.4	5.71484	8.7334	11.5015	14.1279	15.9521	17.9365	19.8882
44.5	5.71045	8.72656	11.5166	14.1313	15.96	17.9258	19.9023
44.6	5.70166	8.73193	11.5078	14.1343	15.9497	17.9302	19.8975
44.7	5.68604	8.72119	11.4922	14.1211	15.9341	17.918	19.8853
44.8	5.6875	8.72705	11.4844	14.1216	15.9355	17.9224	19.8911
44.9	5.7041	8.72656	11.5039	14.1274	15.9341	17.9209	19.8892
45	5.68604	8.73096	11.4897	14.1294	15.9199	17.9185	19.8872
45.1	5.69385	8.729	11.5	14.1353	15.9312	17.9233	19.896
45.2	5.69775	8.7334	11.4922	14.1279	15.9355	17.9287	19.8945
45.3	5.68506	8.73193	11.4922	14.1177	15.9199	17.9121	19.8872
45.4	5.68311	8.72656	11.4922	14.1079	15.9146	17.9102	19.8774
45.5	5.68506	8.72314	11.4922	14.106	15.9106	17.9004	19.8794
45.6	5.68311	8.72119	11.4922	14.1157	15.9209	17.9092	19.8867
45.7	5.68359	8.72168	11.5039	14.124	15.9263	17.9077	19.8921
45.8	5.67822	8.71387	11.5	14.1172	15.9238	17.8896	19.8804
45.9	5.69482	8.71338	11.4946	14.1187	15.9351	17.8818	19.897
46	5.68506	8.71143	11.5015	14.1177	15.9331	17.8779	19.8896
46.1	5.67529	8.70166	11.4922	14.1157	15.9233	17.8804	19.8999
46.2	5.68896	8.70605	11.5054	14.1294	15.9346	17.873	19.8989
46.3	5.67432	8.70068	11.501	14.1235	15.9194	17.8701	19.8853
46.4	5.67529	8.71484	11.5117	14.1265	15.9326	17.8789	19.896
46.5	5.67188	8.71631	11.5156	14.1304	15.9175	17.873	19.8999
46.6	5.67578	8.70605	11.5054	14.1201	15.9185	17.8608	19.8921
46.7	5.68311	8.72119	11.522	14.1353	15.9404	17.8818	19.9077
46.8	5.68359	8.72168	11.5298	14.1475	15.9497	17.8804	19.9141
46.9	5.66406	8.69971	11.5225	14.1372	15.9214	17.8691	19.895
47	5.67529	8.68994	11.5103	14.1274	15.9233	17.8569	19.897
47.1	5.68506	8.70361	11.5054	14.1372	15.9253	17.8521	19.8989
47.2	5.68457	8.70166	11.5117	14.1367	15.9312	17.8701	19.9077
47.3	5.68604	8.69434	11.5142	14.1484	15.9355	17.8687	19.9063
47.4	5.70557	8.69531	11.5156	14.1577	15.9404	17.8701	19.9077
47.5	5.70557	8.70996	11.5249	14.1553	15.9473	17.8818	19.9209
47.6	5.70557	8.70166	11.5322	14.1587	15.9521	17.8818	19.9282
47.7	5.70166	8.70361	11.5225	14.1567	15.9473	17.8794	19.9185
47.8	5.70166	8.70313	11.5322	14.1655	15.9614	17.896	19.9243
47.9	5.71338	8.71143	11.5342	14.1655	15.9731	17.8911	19.9287
48	5.71191	8.70947	11.5391	14.1733	15.981	17.896	19.9468
48.1	5.70313	8.70996	11.5376	14.1836	15.9771	17.8989	19.9443
48.2	5.69922	8.70313	11.5366	14.1709	15.9678	17.8921	19.9375
48.3	5.70654	8.7124	11.5439	14.1899	15.9795	17.9014	19.9492
48.4	5.69531	8.70068	11.5366	14.188	15.9839	17.8989	19.9575
48.5	5.69629	8.71484	11.543	14.1968	15.9912	17.8921	19.9556
48.6	5.69678	8.71533	11.5444	14.1968	15.9761	17.8989	19.9497
48.7	5.70654	8.7124	11.5635	14.2109	15.9819	17.9038	19.957
48.8	5.70557	8.71338	11.5547	14.2085	15.9873	17.9014	19.9556
48.9	5.70166	8.71387	11.5522	14.2148	15.9941	17.9077	19.9678
49	5.6875	8.7124	11.543	14.2192	16.0044	17.9121	19.96
49.1	5.69385	8.70068	11.5391	14.207	15.9951	17.8984	19.9673
49.2	5.68604	8.70605	11.543	14.2163	16.0073	17.9004	19.9692
49.3	5.69385	8.72119	11.543	14.2305	16.0132	17.9102	19.9688
49.4	5.70557	8.72314	11.5522	14.2388	16.0151	17.9238	19.9888
49.5	5.69385	8.72119	11.5337	14.2383	16.0107	17.9155	19.9829
49.6	5.7041	8.72168	11.5493	14.2461	16.0098	17.9092	19.9858
49.7	5.69141	8.71387	11.5483	14.2412	16.0068	17.9131	19.9795
49.8	5.70557	8.72119	11.5571	14.2476	16.0278	17.9233	19.9985
49.9	5.70557	8.72314	11.5537	14.2476	16.0137	17.9302	19.9912
50	5.70557	8.72119	11.5596	14.2539	16.0146	17.9233	20.0054
50.1	5.71191	8.72412	11.5601	14.2476	16.0317	17.938	20.0156
50.2	5.7085	8.72705	11.543	14.2505	16.0151	17.9326	20.0029
50.3	5.69629	8.72266	11.5454	14.2446	16.0132	17.9326	19.9976
50.4	5.71094	8.74365	11.5537	14.2583	16.0176	17.938	20.0171
50.5	5.71582	8.75146	11.5518	14.2695	16.0435	17.9429	20.0171
50.6	5.73291	8.75537	11.564	14.2891	16.0459	17.9614	20.0327
50.7	5.73682	8.76172	11.561	14.2881	16.0645	17.9702	20.0459
50.8	5.7251	8.75537	11.5571	14.2813	16.042	17.9521	20.0259
50.9	5.73682	8.75684	11.5654	14.2881	16.0566	17.9575	20.0396
51	5.73145	8.75928	11.5532	14.2749	16.0615	17.9507	20.0273
51.1	5.71631	8.76318	11.564	14.2671	16.0449	17.9521	20.0366
51.2	5.72363	8.76318	11.5625	14.2788	16.0435	17.9575	20.0459
51.3	5.71729	8.76318	11.5625	14.2866	16.0552	17.96	20.0391
51.4	5.71191	8.75781	11.561	14.2852	16.0498	17.9468	20.043
51.5	5.7085	8.75684	11.5537	14.2725	16.0464	17.9434	20.0396
51.6	5.71338	8.76318	11.5532	14.2866	16.0444	17.9414	20.0483
51.7	5.72607	8.77588	11.5752	14.2852	16.0552	17.9521	20.0508
51.8	5.73584	8.78809	11.5771	14.2896	16.0776	17.9653	20.0679
51.9	5.72217	8.78271	11.5625	14.2876	16.0718	17.9585	20.0679
52	5.73584	8.7959	11.5703	14.2896	16.084	17.96	20.0757
52.1	5.74463	8.80762	11.582	14.293	16.0786	17.9692	20.0757
52.2	5.74561	8.7915	11.5742	14.2905	16.0552	17.9521	20.0796
52.3	5.73584	8.7959	11.5703	14.2881	16.0542	17.9482	20.0757
52.4	5.72119	8.79297	11.5703	14.2954	16.0601	17.9482	20.0664
52.5	5.72363	8.7998	11.5625	14.2881	16.0527	17.939	20.0796
52.6	5.71875	8.80225	11.5718	14.2998	16.0552	17.9419	20.0786
52.7	5.73291	8.81006	11.5728	14.3047	16.063	17.96	20.0767
52.8	5.72217	8.81104	11.5713	14.2969	16.064	17.9609	20.0757
52.9	5.71631	8.80518	11.5771	14.3115	16.0659	17.9629	20.0786
53	5.72754	8.81641	11.5742	14.3164	16.0757	17.9624	20.0781
53.1	5.7251	8.81396	11.5703	14.3091	16.0737	17.9707	20.0874
53.2	5.72266	8.81934	11.5703	14.3125	16.0786	17.9741	20.0952
53.3	5.7041	8.80469	11.5625	14.2891	16.063	17.9482	20.0742
53.4	5.7251	8.8208	11.5625	14.3091	16.063	17.9482	20.0786
53.5	5.729	8.8125	11.5625	14.3071	16.0747	17.9521	20.0703
53.6	5.72412	8.82324	11.564	14.2974	16.0723	17.9404	20.0757
53.7	5.72217	8.83838	11.5791	14.3062	16.0718	17.9482	20.0757
53.8	5.72754	8.84131	11.582	14.2954	16.0747	17.9492	20.0781
53.9	5.73828	8.83496	11.5742	14.2959	16.0659	17.9434	20.0796
54	5.74463	8.854	11.5859	14.2866	16.0718	17.9521	20.0874
54.1	5.73291	8.85449	11.5835	14.2866	16.0737	17.9482	20.0747
54.2	5.73682	8.86475	11.5938	14.2905	16.064	17.9546	20.0767
54.3	5.73291	8.85156	11.5898	14.2842	16.0723	17.9575	20.0679
54.4	5.73291	8.85449	11.603	14.2866	16.0747	17.96	20.0786
54.5	5.7251	8.85303	11.6025	14.2866	16.0669	17.9521	20.0767
54.6	5.7251	8.85303	11.6016	14.2734	16.0591	17.9585	20.0796
54.7	5.71973	8.84619	11.6055	14.271	16.0342	17.9521	20.0796
54.8	5.71729	8.83643	11.6055	14.2686	16.0347	17.9521	20.0693
54.9	5.72266	8.85059	11.6108	14.2827	16.0303	17.9497	20.0874
55	5.71582	8.83057	11.6104	14.2578	16.0239	17.9404	20.0767
55.1	5.71631	8.83252	11.6162	14.2686	16.0137	17.9404	20.0811
55.2	5.7002	8.82813	11.6094	14.271	15.998	17.9263	20.0732
55.3	5.70801	8.82422	11.6196	14.2554	16.0015	17.9375	20.0757
55.4	5.7085	8.83643	11.6045	14.2593	15.9956	17.9316	20.0757
55.5	5.71436	8.84375	11.6025	14.2695	16.0054	17.9429	20.0898
55.6	5.70557	8.85156	11.6016	14.2646	15.9941	17.9443	20.085
55.7	5.70459	8.84424	11.6123	14.2671	15.9927	17.9277	20.0874
55.8	5.70801	8.84131	11.6025	14.2671	15.9966	17.9297	20.0898
55.9	5.70654	8.83203	11.6055	14.2563	15.9937	17.9209	20.0874
56	5.71631	8.85303	11.6055	14.2583	15.9956	17.9404	20.1006
56.1	5.70166	8.84668	11.5991	14.2554	15.9902	17.9263	20.1016
56.2	5.71338	8.83838	11.5923	14.2617	15.9819	17.9375	20.1069
56.3	5.70557	8.84668	11.603	14.2583	15.9839	17.9316	20.0991
56.4	5.72754	8.85303	11.6016	14.2642	15.9937	17.9414	20.1069
56.5	5.72656	8.85156	11.6055	14.2593	15.9966	17.9419	20.1108
56.6	5.72363	8.8623	11.6118	14.2764	16.0137	17.9497	20.1147
56.7	5.72656	8.86475	11.6045	14.2788	16.0044	17.9404	20.1084
56.8	5.73291	8.86328	11.6118	14.2695	16.0044	17.9365	20.1147
56.9	5.73389	8.88428	11.6196	14.2866	16.0107	17.9492	20.1274
57	5.73975	8.87549	11.6147	14.2788	16.0098	17.9434	20.124
57.1	5.72363	8.86719	11.6172	14.2646	16.0098	17.9248	20.124
57.2	5.7251	8.86084	11.6133	14.2578	16.0015	17.9312	20.1157
57.3	5.72656	8.86084	11.6328	14.2778	16.0151	17.9404	20.1318
57.4	5.7251	8.85547	11.6328	14.2759	16.0068	17.9443	20.1382
57.5	5.73535	8.87402	11.6313	14.2764	16.0342	17.9404	20.1367
57.6	5.72656	8.85693	11.6289	14.2695	16.0176	17.9248	20.1201
57.7	5.71973	8.86719	11.6304	14.2646	16.0107	17.9263	20.1265
57.8	5.70947	8.86865	11.6157	14.2593	16.0059	17.9233	20.1201
57.9	5.73438	8.88184	11.6304	14.2734	16.0239	17.938	20.1445
58	5.72363	8.875	11.6211	14.2671	16.0225	17.9297	20.1265
58.1	5.74463	8.89209	11.6343	14.2686	16.0229	17.9395	20.1382
58.2	5.74609	8.88184	11.6392	14.2749	16.0303	17.938	20.1382
58.3	5.73389	8.87109	11.6196	14.2554	16.0146	17.9297	20.1406
58.4	5.73438	8.87256	11.625	14.2554	16.0332	17.9482	20.1553
58.5	5.72266	8.87012	11.6304	14.2539	16.042	17.938	20.1577
58.6	5.70801	8.85547	11.6274	14.2554	16.0293	17.9351	20.1523
58.7	5.71875	8.86377	11.6304	14.2646	16.0371	17.9316	20.1685
58.8	5.73145	8.86328	11.6211	14.2578	16.0522	17.939	20.1655
58.9	5.71973	8.875	11.625	14.2593	16.0615	17.9531	20.1782
59	5.72656	8.88428	11.6226	14.2725	16.0776	17.9551	20.1787
59.1	5.7251	8.88184	11.6001	14.2632	16.0605	17.9365	20.167
59.2	5.73828	8.87402	11.5977	14.2593	16.0654	17.9302	20.1694
59.3	5.74072	8.88672	11.6187	14.2734	16.0903	17.9351	20.1812
59.4	5.7251	8.89209	11.6221	14.2788	16.0942	17.9404	20.1797
59.5	5.72119	8.88037	11.6123	14.2686	16.0918	17.9497	20.1748
59.6*	5.7251*	8.88184*	11.6211*	14.2749*	16.0801*	17.9365*	20.1631*
59.7*	5.73682*	8.88525*	11.6196*	14.2866*	16.0913*	17.9272*	20.1548*
59.8*	5.74219*	8.90283*	11.6318*	14.2866*	16.0879*	17.9199*	20.1709*
59.9*	5.72217*	8.88916*	11.6245*	14.2891*	16.1045*	17.918*	20.1758*
60*	5.71191*	8.90381*	11.6587*	14.2891*	16.1177*	17.9233*	20.1772*
60.1*	5.71777*	8.89746*	11.6694*	14.292*	16.0879*	17.9614*	20.1733*
60.2*	5.67822*	8.87891*	11.646*	14.2827*	16.0449*	17.9458*	20.1772*
60.3*	5.68311*	8.87891*	11.6274*	14.2671*	16.0381*	17.957*	20.1641*
60.4*	5.71338*	8.896*	11.6367*	14.3008*	16.063*	17.9912*	20.1592*
60.5*	5.73438*	8.91309*	11.6616*	14.3115*	16.063*	17.9785*	20.1772*
60.6*	5.74316*	8.90527*	11.6704*	14.3438*	16.0527*	17.9561*	20.1992*
60.7*	5.74072*	8.93359*	11.6616*	14.4341*	16.0327*	17.9272*	20.2124*
60.8*	5.81592*	9.0166*	11.6782*	14.542*	16.1372*	17.9966*	20.2446*
60.9*	5.98828*	9.15137*	11.7881*	14.249*	16.4302*	18.2036*	20.4561*
61*	6.18408*	9.03027*	12.0137*	14.4404*	16.437*	18.167*	20.606*
61.1*	5.854*	8.88672*	11.9678*	14.3179*	16.3062*	18.0391*	20.4302*
61.2*	5.83252*	8.84033*	11.7207*	14.9287*	16.2041*	17.8042*	20.3076*
61.3*	5.15381*	8.98193*	11.3652*	19.4785*	17.1841*	19.2622*	20.2451*
61.4*	4.30176*	9.42578*	10.9316*	22.9229*	21.728*	27.4697*	26.376*
61.5*	5.02295*	10.1826*	13.0674*	22.0991*	27.2148*	39.5835*	51.5327*
61.6*	6.16846*	10.6421*	15.5762*	21.521*	29.2729*	45.0083*	69.5654*
61.7*	7.22021*	11.2095*	16.7109*	21.1431*	29.7808*	44.9458*	73.0024*
61.8*	7.66895*	11.4751*	17.4375*	20.9648*	29.6685*	43.6641*	71.2075*
61.9*	7.89502*	11.748*	17.8701*	20.7505*	29.1963*	42.1309*	67.7412*
62*	8.1626*	11.8628*	18.1436*	20.5879*	28.481*	40.6592*	63.5562*
62.1*	8.40234*	12.1753*	18.21*	20.5059*	28.0752*	38.6416*	59.8765*
62.2*	8.29639*	12.2227*	18.2095*	20.6206*	27.7734*	36.9756*	56.7485*
62.3*	8.32666*	12.4526*	18.0474*	20.2456*	27.061*	35.6025*	53.5581*
62.4*	8.37793*	12.3359*	17.8804*	19.9185*	26.2314*	33.6401*	50.1279*
62.5*	8.41016*	12.3984*	17.8452*	20.0576*	25.8857*	32.3813*	47.064*
62.6*	8.17383*	12.0186*	17.4175*	19.5576*	25.1445*	30.8462*	44.2549*
62.7*	8.21191*	12.1323*	16.9844*	19.439*	24.438*	29.7554*	41.8062*
62.8*	8.02344*	12.1421*	16.8223*	19.2261*	23.6919*	28.6826*	39.3667*
62.9*	8.33252*	12.3125*	16.9199*	19.3838*	23.2856*	27.9194*	37.3008*
63*	7.97363*	11.9644*	16.3691*	18.9546*	22.5938*	26.5381*	34.8374*
63.1*	8.04395*	12.1055*	16.2544*	18.8828*	22.1533*	26.0796*	33.6641*
63.2*	8.10596*	12.2534*	16.1895*	18.7319*	21.7056*	25.3838*	32.3804*
63.3*	7.79736*	12.1187*	16.0898*	18.2661*	21.2324*	24.6436*	31.1714*
63.4*	7.875*	12.0796*	15.957*	18.1362*	20.9268*	24.0498*	30.1191*
63.5*	7.80859*	11.96*	15.7905*	17.8374*	20.6099*	23.4224*	29.1826*
63.6*	7.77197*	11.769*	15.5605*	17.7432*	20.2656*	22.7822*	28.0601*
63.7*	7.7749*	11.6226*	15.3374*	17.5459*	19.8965*	22.3057*	27.1499*
63.8*	7.71191*	11.5156*	15.1372*	17.3633*	19.5869*	21.8467*	26.4102*
63.9*	7.67041*	11.4702*	14.9609*	17.1914*	19.2568*	21.4546*	25.7632*
64*	7.67236*	11.4502*	14.9033*	16.9995*	19.0273*	21.083*	25.1714*
64.1*	7.54932*	11.3789*	14.7373*	16.7241*	18.667*	20.6836*	24.5259*
64.2*	7.49512*	11.3203*	14.6304*	16.5586*	18.4067*	20.3091*	23.9365*
64.3*	7.41357*	11.2588*	14.5098*	16.3618*	18.147*	19.9932*	23.4565*
64.4*	7.39404*	11.189*	14.4282*	16.2173*	17.9106*	19.689*	23*
64.5*	7.42188*	11.1426*	14.3218*	16.1499*	17.7451*	19.4834*	22.8125*
64.6*	7.42041*	11.1177*	14.2085*	16.0718*	17.5723*	19.3193*	22.5366*
64.7*	7.39941*	11.043*	14.083*	15.9546*	17.4067*	19.0796*	22.2461*
64.8*	7.29688*	10.8413*	13.8687*	15.7671*	17.1411*	18.7632*	21.8257*
64.9*	7.27588*	10.8037*	13.7188*	15.6357*	16.9395*	18.5488*	21.5107*
65*	7.21191*	10.7085*	13.6001*	15.4712*	16.7202*	18.3257*	21.186*
65.1*	7.1665*	10.6655*	13.5327*	15.3545*	16.541*	18.1162*	20.917*
65.2*	7.12891*	10.5938*	13.4038*	15.2202*	16.417*	17.9678*	20.7046*
65.3*	7.07373*	10.5195*	13.3032*	15.0835*	16.231*	17.7852*	20.4595*
65.4*	7.06104*	10.4897*	13.1978*	15.0015*	16.0762*	17.6514*	20.21*
65.5	7.02344	10.4497	13.1133	14.8804	15.9224	17.4707	19.9702
65.6	6.99463	10.3813	13.0259	14.7539	15.7842	17.3218	19.7798
65.7	6.94531	10.313	12.9116	14.6177	15.6387	17.1489	19.5225
65.8	6.92041	10.2202	12.7632	14.4819	15.4653	16.9248	19.2725
65.9	6.87354	10.1289	12.6353	14.3477	15.3325	16.7319	19.0508
66	6.84863	10.0664	12.5884	14.2437	15.1943	16.5928	18.8374
66.1	6.80078	9.99414	12.5107	14.0903	15.0229	16.4199	18.6499
66.2	6.74316	9.9126	12.3813	13.9517	14.853	16.2134	18.4961
66.3	6.68848	9.81543	12.2773	13.7866	14.6855	16.02	18.2944
66.4	6.6709	9.75293	12.1968	13.6411	14.5747	15.8755	18.1216
66.5	6.56201	9.63037	12.0571	13.4883	14.4131	15.6851	17.9165
66.6	6.51709	9.54297	11.9546	13.3896	14.2793	15.5396	17.7397
66.7	6.48389	9.47412	11.8657	13.2891	14.145	15.3818	17.5664
66.8	6.45703	9.4248	11.7866	13.2295	14.0317	15.2178	17.4326
66.9	6.41895	9.38428	11.707	13.1187	13.9248	15.0811	17.3008
67	6.40869	9.31006	11.6211	13.0132	13.7676	14.9185	17.1357
67.1	6.39063	9.24609	11.522	12.8984	13.6333	14.7734	16.9727
67.2	6.35645	9.18506	11.3936	12.792	13.5161	14.6309	16.8169
67.3	6.31738	9.12256	11.2759	12.6592	13.3896	14.4492	16.6235
67.4	6.29688	9.07178	11.1719	12.5469	13.2729	14.3247	16.4771
67.5	6.26953	9.01855	11.1016	12.4546	13.1616	14.2451	16.354
67.6	6.25488	8.96484	11.0234	12.3569	13.0527	14.1201	16.2217
67.7	6.21729	8.91162	10.9272	12.2671	12.9419	13.9873	16.0874
67.8	6.2251	8.86475	10.8477	12.1758	12.8442	13.8701	15.9844
67.9	6.19238	8.8125	10.7407	12.0576	12.7217	13.7749	15.8516
68	6.16406	8.74121	10.6797	11.9429	12.6099	13.6553	15.7334
68.1	6.13525	8.72412	10.6069	11.8701	12.5347	13.5747	15.5967
68.2	6.09473	8.6709	10.5415	11.7852	12.4404	13.46	15.4546
68.3	6.05615	8.59668	10.4639	11.6865	12.3457	13.3521	15.3076
68.4	6.04248	8.58301	10.4175	11.6079	12.2686	13.272	15.2056
68.5	6.01025	8.5498	10.3608	11.5249	12.2139	13.1709	15.0874
68.6	5.97656	8.48438	10.2734	11.4302	12.1372	13.0527	14.9546
68.7	5.92432	8.43408	10.2007	11.3594	12.041	12.9092	14.7998
68.8	5.91504	8.4126	10.1313	11.3164	11.9663	12.8335	14.6992
68.9	5.83594	8.35449	10.0811	11.2192	11.8628	12.7114	14.5396
69	5.80469	8.30225	9.98047	11.1499	11.7935	12.603	14.4375
69.1	5.74951	8.26172	9.93066	11.0938	11.71	12.4897	14.293
69.2	5.72559	8.22168	9.87793	11.0146	11.6309	12.3599	14.2646
69.3	5.68311	8.15381	9.78906	10.918	11.5239	12.2739	14.1694
69.4	5.65332	8.11084	9.75098	10.8555	11.4429	12.25	14.1157
69.5	5.646	8.07178	9.70068	10.7988	11.3862	12.2114	14.0591
69.6	5.62354	8.02246	9.62256	10.7461	11.2832	12.1411	13.9546
69.7	5.59619	7.98047	9.54932	10.6772	11.1943	12.103	13.8765
69.8	5.58301	7.93115	9.50537	10.6055	11.124	12.0381	13.7969
69.9	5.53516	7.8623	9.40625	10.4951	11.0254	11.96	13.7061
70	5.51172	7.80225	9.3125	10.3984	10.9224	11.8389	13.5664
70.1	5.48291	7.77344	9.28125	10.3296	10.8223	11.749	13.499
70.2	5.46436	7.72412	9.2251	10.2593	10.7349	11.6514	13.4063
70.3	5.4375	7.67334	9.17041	10.1772	10.624	11.5615	13.2983
70.4	5.40332	7.63281	9.09521	10.0874	10.542	11.46	13.2109
70.5	5.37891	7.6123	9.02197	10.0093	10.4785	11.3882	13.1318
70.6	5.34473	7.55371	8.95459	9.91699	10.4067	11.2739	13.0444
70.7	5.3125	7.51025	8.88281	9.85303	10.3325	11.1787	12.9546
70.8	5.25244	7.44287	8.8125	9.77588	10.21	11.0874	12.8452
70.9	5.19385	7.40137	8.74219	9.68652	10.1177	11.0029	12.7476
71	5.17432	7.34521	8.67188	9.61084	10.0474	10.9224	12.6499
71.1	5.1377	7.30469	8.62354	9.55859	10.0044	10.8413	12.6172
71.2	5.12354	7.26953	8.55078	9.50537	9.94434	10.7607	12.5366
71.3	5.07666	7.21777	8.49365	9.42725	9.8667	10.6709	12.4404
71.4	5.04297	7.18115	8.44141	9.36865	9.81299	10.6006	12.3452
71.5	5.01416	7.13184	8.37354	9.32959	9.75293	10.5225	12.2578
71.6	4.98145	7.07959	8.30469	9.27637	9.65283	10.439	12.1382
71.7	4.96094	7.04443	8.24756	9.18896	9.60742	10.3652	12.0732
71.8	4.94238	7.01318	8.21484	9.13818	9.54346	10.2944	11.9961
71.9	4.89307	6.98193	8.14844	9.05615	9.49902	10.2271	11.9077
72	4.87744	6.94141	8.11328	9.00781	9.4458	10.1304	11.8296
72.1	4.85938	6.89746	8.06494	8.95996	9.39648	10.0552	11.7607
72.2	4.85645	6.85156	8.02344	8.8999	9.33105	9.99121	11.6733
72.3	4.82568	6.80518	7.99756	8.86865	9.26758	9.96143	11.5757
72.4	4.80566	6.75391	7.92188	8.8125	9.22314	9.89209	11.5117
72.5	4.78369	6.74365	7.88281	8.7583	9.16699	9.85059	11.46
72.6	4.75244	6.69824	7.82813	8.68359	9.09961	9.77637	11.3828
72.7	4.73926	6.64307	7.79541	8.62109	9.05762	9.72021	11.332
72.8	4.71338	6.58496	7.76172	8.57715	8.99268	9.65283	11.249
72.9	4.68359	6.53906	7.71484	8.51563	8.9458	9.56787	11.1748
73	4.65625	6.4834	7.66553	8.45752	8.86279	9.4707	11.0757
73.1	4.62207	6.47168	7.61963	8.38428	8.7998	9.40771	11.0171
73.2	4.59619	6.42432	7.57666	8.35791	8.74512	9.35303	10.9478
73.3	4.57666	6.41455	7.53662	8.3208	8.6958	9.31152	10.8794
73.4	4.54004	6.36719	7.48975	8.24365	8.62158	9.23877	10.814
73.5	4.49609	6.33496	7.44385	8.20703	8.56445	9.1748	10.7461
73.6	4.49316	6.28906	7.42188	8.1875	8.51074	9.13037	10.689
73.7	4.45459	6.23193	7.37646	8.13721	8.45361	9.05127	10.6201
73.8	4.44238	6.20996	7.3501	8.10156	8.39258	9.01611	10.5625
73.9	4.40723	6.14844	7.29297	8.03662	8.31396	8.93994	10.5054
74	4.38428	6.10303	7.23047	7.98584	8.25586	8.90039	10.4351
74.1	4.37207	6.07178	7.19385	7.9375	8.21387	8.85156	10.3789
74.2	4.33691	6.021	7.14209	7.88574	8.13623	8.80273	10.3115
74.3	4.33594	6.01074	7.07813	7.80469	8.07324	8.74121	10.2656
74.4	4.30713	5.9624	7.01709	7.76074	8.02686	8.70996	10.1919
74.5	4.28369	5.95313	6.99854	7.71631	7.99219	8.64844	10.125
74.6	4.26172	5.93262	6.95313	7.66699	7.94727	8.61133	10.0991
74.7	4.23535	5.88135	6.92188	7.60791	7.90137	8.54053	10.0366
74.8	4.2251	5.87793	6.89453	7.55127	7.83545	8.51074	9.99756
74.9	4.19922	5.85693	6.86084	7.48193	7.78174	8.45752	9.95215
75	4.16113	5.81934	6.7915	7.42725	7.74121	8.396	9.88281
75.1	4.12354	5.771	6.7334	7.36475	7.66357	8.34961	9.80762
75.2	4.09619	5.76172	6.68066	7.32813	7.63281	8.28906	9.75391
75.3	4.08691	5.72412	6.6626	7.30615	7.5957	8.24121	9.69922
75.4	4.06787	5.68262	6.62402	7.28027	7.55518	8.20215	9.64355
75.5	4.02588	5.64209	6.56006	7.22559	7.49561	8.13086	9.60596
75.6	4.0166	5.60303	6.50098	7.19775	7.44287	8.07813	9.54785
75.7	3.98535	5.56006	6.45703	7.14746	7.41211	8.03418	9.4873
75.8	3.94678	5.50146	6.39209	7.07568	7.35205	7.9707	9.41943
75.9	3.91748	5.46631	6.35547	7.04834	7.32568	7.91016	9.34912
76	3.896	5.44287	6.3125	7.0249	7.28467	7.87012	9.28662
76.1	3.86279	5.41162	6.26953	6.97656	7.23193	7.81152	9.23047
76.2	3.85547	5.39209	6.26172	6.94434	7.16748	7.76074	9.18799
76.3	3.82568	5.34033	6.24219	6.896	7.10205	7.68945	9.15381
76.4	3.78467	5.2915	6.18359	6.8374	7.04199	7.64063	9.08838
76.5	3.7749	5.26855	6.16943	6.78418	6.97461	7.61914	9.03564
76.6	3.76123	5.23828	6.1416	6.73682	6.95215	7.57813	8.99609
76.7	3.74463	5.20068	6.10449	6.68799	6.89404	7.53955	8.95459
76.8	3.71582	5.17334	6.07129	6.65479	6.84131	7.48193	8.90771
76.9	3.68896	5.14209	6.04053	6.61865	6.80518	7.43799	8.85693
77	3.65332	5.11865	6.00146	6.57715	6.76367	7.36865	8.80371
77.1	3.63818	5.09424	5.97266	6.52637	6.72314	7.33008	8.75537
77.2	3.61035	5.04932	5.94141	6.49854	6.70215	7.28906	8.69775
77.3	3.58447	5.03027	5.91016	6.44971	6.68311	7.24023	8.64893
77.4	3.56738	4.98193	5.86035	6.41406	6.65381	7.1875	8.59619
77.5	3.56787	4.98193	5.8335	6.37646	6.62305	7.14258	8.5498
77.6	3.53467	4.95166	5.80469	6.35938	6.57471	7.07813	8.51563
77.7	3.51807	4.91455	5.77344	6.34814	6.53564	7.04199	8.45752
77.8	3.50537	4.87793	5.73975	6.31152	6.50342	7.00195	8.41553
77.9	3.47363	4.83984	5.70068	6.28516	6.47949	6.9585	8.375
78	3.4541	4.82178	5.68066	6.23438	6.4624	6.9209	8.34912
78.1	3.4375	4.80469	5.63428	6.19922	6.4082	6.88037	8.30859
78.2	3.42432	4.77246	5.60693	6.18799	6.3833	6.82861	8.27783
78.3	3.39551	4.73975	5.55957	6.15234	6.35205	6.78027	8.25635
78.4	3.3877	4.72266	5.52588	6.10938	6.31543	6.74902	8.22803
78.5	3.38281	4.69043	5.50293	6.09814	6.27295	6.71777	8.17627
78.6	3.35791	4.66553	5.46582	6.07666	6.24365	6.70996	8.13916
78.7	3.34375	4.63428	5.4248	6.0498	6.22461	6.6709	8.08887
78.8	3.32764	4.60938	5.38916	6.00928	6.19678	6.63037	8.02881
78.9	3.30615	4.58496	5.33203	5.97803	6.15576	6.59277	7.98584
79	3.29541	4.59131	5.29443	5.94678	6.10449	6.56299	7.94922
79.1	3.29541	4.55225	5.30078	5.92627	6.08398	6.54736	7.89893
79.2	3.28223	4.54443	5.25	5.88525	6.04346	6.5	7.84375
79.3	3.26953	4.51318	5.2251	5.87891	5.99512	6.47559	7.80078
79.4	3.25244	4.50146	5.18896	5.85596	5.93164	6.46924	7.7583
79.5	3.24316	4.48047	5.16113	5.83447	5.87158	6.42725	7.71094
79.6	3.21729	4.43652	5.13818	5.79053	5.83252	6.39502	7.65771
79.7	3.18506	4.43115	5.14453	5.77002	5.79102	6.3584	7.62646
79.8	3.17676	4.42334	5.10303	5.72412	5.74512	6.31934	7.61865
79.9	3.1626	4.41309	5.10156	5.69531	5.71143	6.29053	7.58887
80	3.14795	4.39307	5.06348	5.65771	5.66455	6.25293	7.54541
80.1	3.12646	4.37256	5.05225	5.64355	5.65283	6.23877	7.52637
80.2	3.104	4.35303	5.0249	5.59766	5.58643	6.19287	7.48584
80.3	3.09473	4.33496	5.01416	5.56787	5.57471	6.1709	7.46777
80.4	3.07813	4.31396	4.98438	5.53125	5.5459	6.1333	7.42725
80.5	3.06592	4.30078	4.97266	5.50928	5.55518	6.11865	7.39697
80.6	3.04443	4.26318	4.94141	5.47559	5.50439	6.06934	7.3374
80.7	3.02197	4.23193	4.91016	5.41797	5.47314	6.01855	7.31787
80.8	2.99463	4.19189	4.88281	5.39746	5.44482	5.98877	7.28955
80.9	2.99463	4.18359	4.86475	5.3584	5.4248	5.94189	7.24609
81	2.97119	4.17969	4.82666	5.33203	5.41064	5.90625	7.21484
81.1	2.95801	4.14746	4.79541	5.28125	5.36377	5.88184	7.18262
81.2	2.94141	4.14209	4.75928	5.25684	5.33252	5.82861	7.146
81.3	2.90723	4.11084	4.72266	5.21777	5.2959	5.78174	7.10693
81.4	2.89551	4.104	4.70313	5.19141	5.27393	5.75537	7.05615
81.5	2.87891	4.0874	4.6665	5.15234	5.24658	5.7124	7.01709
81.6	2.86328	4.06299	4.64209	5.11621	5.20361	5.68799	6.96631
81.7	2.85645	4.04053	4.60303	5.08887	5.17383	5.64209	6.92725
81.8	2.84619	4.01563	4.59229	5.06641	5.14355	5.6123	6.88818
81.9	2.84766	4.00537	4.58203	5.04834	5.13477	5.57324	6.87891
82	2.82764	3.98584	4.55566	5.02979	5.10059	5.55371	6.82813
82.1	2.80713	3.9624	4.52734	5.01074	5.07715	5.51074	6.77881
82.2	2.80713	3.95313	4.51709	5.01172	5.06543	5.47949	6.76074
82.3	2.80078	3.93506	4.48438	4.9834	5.05908	5.44434	6.71094
82.4	2.79297	3.92627	4.46484	4.97803	5.02686	5.4209	6.66699
82.5	2.77441	3.8999	4.44141	4.95459	4.99268	5.37793	6.61865
82.6	2.76172	3.87012	4.3999	4.93652	4.95361	5.35986	6.57861
82.7	2.74707	3.83984	4.39209	4.92871	4.94189	5.31934	6.55225
82.8	2.73535	3.83203	4.36963	4.90234	4.91455	5.29199	6.52588
82.9	2.71875	3.80225	4.33984	4.86719	4.87158	5.26074	6.49756
83	2.70313	3.78027	4.32178	4.84668	4.85596	5.22705	6.46777
83.1	2.68213	3.75146	4.28906	4.80615	4.81299	5.18652	6.43506
83.2	2.65479	3.72168	4.27197	4.77637	4.78564	5.15918	6.396
83.3	2.63379	3.7085	4.26172	4.75146	4.76221	5.12793	6.35303
83.4	2.63379	3.67041	4.24072	4.74463	4.74268	5.10693	6.33594
83.5	2.61572	3.67334	4.22266	4.73047	4.72314	5.09131	6.31152
83.6	2.58984	3.64209	4.17334	4.68896	4.69434	5.06152	6.26709
83.7	2.58984	3.62012	4.17725	4.66699	4.66992	5.04736	6.22168
83.8	2.5752	3.58594	4.14307	4.63184	4.64502	5.01221	6.20459
83.9	2.56494	3.56152	4.12109	4.61475	4.61523	4.98975	6.18506
84	2.54688	3.55225	4.10303	4.59521	4.59277	4.97949	6.16553
84.1	2.53467	3.52344	4.08057	4.55469	4.57324	4.93896	6.14453
84.2	2.53125	3.50537	4.07422	4.54053	4.54736	4.91309	6.13281
84.3	2.51953	3.48193	4.04297	4.51709	4.52148	4.87939	6.10449
84.4	2.49463	3.4624	4.02344	4.47803	4.47559	4.83105	6.06934
84.5	2.49707	3.45605	4.00635	4.47021	4.47705	4.81299	6.05615
84.6	2.50244	3.43896	3.98047	4.43506	4.43555	4.77637	6.01563
84.7	2.48535	3.43115	3.95313	4.40771	4.42236	4.74902	5.99756
84.8	2.479	3.40234	3.93604	4.38818	4.40137	4.72266	5.96875
84.9	2.4751	3.37256	3.90771	4.36865	4.36377	4.69043	5.93896
85	2.45313	3.37012	3.8999	4.35693	4.33252	4.66846	5.91943
85.1	2.4126	3.34131	3.83984	4.32568	4.30518	4.62012	5.87012
85.2	2.40723	3.32422	3.82422	4.31006	4.28564	4.60059	5.84912
85.3	2.39307	3.31006	3.80322	4.28662	4.25586	4.5498	5.82568
85.4	2.39844	3.29443	3.78662	4.27881	4.22314	4.52246	5.79834
85.5	2.40234	3.28027	3.77881	4.26465	4.20361	4.51074	5.78662
85.6	2.38525	3.25146	3.74219	4.23584	4.18408	4.47168	5.75928
85.7	2.37354	3.23193	3.71875	4.21631	4.15283	4.44824	5.72803
85.8	2.36035	3.23828	3.7002	4.20313	4.13184	4.44678	5.71484
85.9	2.34619	3.20459	3.68359	4.18896	4.09424	4.41455	5.6709
86	2.33691	3.20605	3.66406	4.17725	4.07471	4.40918	5.65771
86.1	2.33838	3.19287	3.65771	4.15137	4.04736	4.39355	5.63037
86.2	2.32422	3.17871	3.63037	4.13184	4.03467	4.36768	5.58496
86.3	2.30713	3.15234	3.6001	4.10938	3.99268	4.33887	5.54834
86.4	2.28516	3.1499	3.5835	4.09521	3.96143	4.31934	5.52344
86.5	2.27295	3.13281	3.58057	4.08594	3.95996	4.30078	5.48975
86.6	2.27588	3.11475	3.56494	4.06787	3.93652	4.29199	5.47803
86.7	2.26416	3.10303	3.55078	4.04834	3.91455	4.27246	5.45703
86.8	2.24609	3.10303	3.54297	4.02881	3.8833	4.25293	5.43896
86.9	2.23682	3.0874	3.52734	4.00928	3.85596	4.22559	5.41162
87	2.23291	3.06934	3.521	3.9873	3.83545	4.20117	5.37939
87.1	2.21729	3.04443	3.49219	3.94922	3.8208	4.17871	5.34521
87.2	2.19629	3.021	3.48193	3.92725	3.80908	4.15918	5.32568
87.3	2.18604	3.01318	3.46094	3.8999	3.79346	4.13965	5.30859
87.4	2.17285	2.98828	3.45557	3.88672	3.75684	4.10938	5.29297
87.5	2.146	2.97168	3.43896	3.8584	3.73242	4.09033	5.25684
87.6	2.14307	2.95215	3.42188	3.84912	3.72314	4.08105	5.23584
87.7	2.12598	2.93115	3.39307	3.81787	3.69043	4.0498	5.20996
87.8	2.13379	2.92969	3.38916	3.80859	3.67236	4.04199	5.18359
87.9	2.10791	2.91553	3.375	3.76855	3.65674	4.02246	5.15771
88	2.09521	2.88965	3.36084	3.72559	3.63086	3.98877	5.12402
88.1	2.09619	2.86084	3.33203	3.71094	3.61377	3.9624	5.09521
88.2	2.07275	2.83984	3.3125	3.69434	3.60449	3.94824	5.07568
88.3	2.07031	2.83887	3.30225	3.66699	3.5918	3.93018	5.05371
88.4	2.05322	2.82178	3.29541	3.62891	3.57471	3.90918	5.02734
88.5	2.04395	2.80225	3.29443	3.62646	3.55127	3.88037	5.01709
88.6	2.04541	2.78271	3.28125	3.61621	3.54346	3.87402	5
88.7	2.03369	2.75928	3.26953	3.58594	3.52002	3.85059	4.97803
88.8	2.00391	2.74219	3.25244	3.57568	3.50049	3.81934	4.93652
88.9	2.00098	2.74219	3.24072	3.54834	3.4834	3.79199	4.92578
89	1.98291	2.7124	3.21484	3.5249	3.45361	3.78027	4.896
89.1	1.97754	2.70605	3.19531	3.51709	3.4458	3.76074	4.88818
89.2	1.9751	2.69922	3.17188	3.48584	3.43408	3.7373	4.87891
89.3	1.96484	2.68506	3.15625	3.46631	3.41699	3.73193	4.86084
89.4	1.92432	2.66553	3.13281	3.44678	3.39502	3.72168	4.82959
89.5	1.92432	2.65771	3.12646	3.42969	3.37939	3.70605	4.82324
89.6	1.9126	2.64746	3.11328	3.40137	3.35596	3.68262	4.80859
89.7	1.9165	2.63428	3.09375	3.40771	3.33643	3.66309	4.79053
89.8	1.91406	2.62012	3.09131	3.40527	3.32764	3.66064	4.77637
89.9	1.8916	2.59912	3.06885	3.38428	3.30127	3.63965	4.74365
90	1.89307	2.59131	3.05469	3.36475	3.29346	3.62012	4.72803
90.1	1.88135	2.57959	3.03125	3.35303	3.27002	3.60059	4.70459
90.2	1.86182	2.56006	3.01172	3.32568	3.23096	3.56934	4.67334
90.3	1.86572	2.55225	2.99219	3.30615	3.21143	3.56299	4.66553
90.4	1.86035	2.56104	2.99072	3.30469	3.20996	3.56787	4.65625
90.5	1.84619	2.54443	2.95313	3.27881	3.18408	3.53027	4.62793
90.6	1.84619	2.53662	2.95703	3.271	3.17627	3.51074	4.61865
90.7	1.83203	2.52246	2.94287	3.24512	3.14502	3.49512	4.59277
90.8	1.81738	2.50537	2.91406	3.23584	3.12549	3.46143	4.56396
90.9	1.81494	2.48975	2.90381	3.22412	3.10205	3.44824	4.54443
91	1.81494	2.48193	2.90234	3.21631	3.08643	3.44043	4.53662
91.1	1.80713	2.48584	2.88281	3.20703	3.07471	3.4209	4.51953
91.2	1.79541	2.47412	2.87109	3.17725	3.05518	3.41943	4.51709
91.3	1.77588	2.45313	2.83838	3.15625	3.02393	3.3999	4.48438
91.4	1.76807	2.43652	2.82275	3.14209	3.00439	3.38574	4.4585
91.5	1.76416	2.44287	2.80469	3.13037	2.99268	3.3623	4.44141
91.6	1.75635	2.42334	2.78516	3.09912	2.96533	3.34277	4.41943
91.7	1.74609	2.41309	2.7749	3.08887	2.95117	3.32227	4.39746
91.8	1.73291	2.38818	2.75391	3.06787	2.93018	3.29443	4.36865
91.9	1.7251	2.39453	2.73438	3.06006	2.92236	3.27246	4.36084
92	1.71338	2.39209	2.73047	3.05615	2.91064	3.25049	4.33887
92.1	1.70557	2.39209	2.72266	3.04053	2.90283	3.24902	4.32568
92.2	1.69385	2.37256	2.70313	3.01709	2.87402	3.21777	4.30615
92.3	1.69775	2.35303	2.69531	3.01855	2.87549	3.20996	4.28662
92.4	1.68604	2.34131	2.69141	2.99756	2.86377	3.19287	4.26709
92.5	1.68359	2.33105	2.68115	2.9873	2.8418	3.18018	4.25537
92.6	1.67041	2.31006	2.66016	2.97412	2.83008	3.15918	4.21631
92.7	1.67432	2.30225	2.65381	2.96631	2.80371	3.15137	4.20996
92.8	1.65723	2.28516	2.64307	2.94922	2.7959	3.12793	4.1875
92.9	1.67432	2.30225	2.65234	2.94678	2.80518	3.12012	4.19531
93	1.67188	2.28809	2.63818	2.93262	2.79102	3.09668	4.1748
93.1	1.65088	2.271	2.61963	2.91553	2.78174	3.08887	4.16553
93.2	1.64307	2.26465	2.60303	2.90527	2.77393	3.08105	4.15918
93.3	1.64307	2.27881	2.59766	2.89209	2.75049	3.06934	4.13428
93.4	1.6416	2.26953	2.58838	2.88281	2.74121	3.06006	4.125
93.5	1.62354	2.25928	2.57031	2.85303	2.72461	3.03027	4.10693
93.6	1.61572	2.25146	2.56104	2.84521	2.72314	3.02246	4.0874
93.7	1.60254	2.23193	2.53516	2.81787	2.69189	2.99121	4.07959
93.8	1.60791	2.23438	2.53516	2.81787	2.69189	3.00293	4.06787
93.9	1.6001	2.24365	2.53516	2.81787	2.68408	2.99121	4.06006
94	1.59619	2.23193	2.52344	2.80615	2.66064	2.97168	4.05078
94.1	1.60156	2.23584	2.51563	2.79834	2.65283	2.96387	4.05225
94.2	1.604	2.23193	2.50391	2.78516	2.65283	2.95215	4.02881
94.3	1.59619	2.22412	2.49609	2.77246	2.64502	2.94043	4.02881
94.4	1.58447	2.2124	2.49219	2.77344	2.63574	2.92871	4.01855
94.5	1.58203	2.20215	2.48193	2.7583	2.63086	2.93164	4.01318
94.6	1.55322	2.18115	2.45313	2.74365	2.60205	2.90918	3.96631
94.7	1.5415	2.16943	2.44678	2.72412	2.59033	2.89746	3.95605
94.8	1.54004	2.16797	2.42822	2.70166	2.57178	2.896	3.95313
94.9	1.5376	2.16553	2.41406	2.68896	2.56445	2.88184	3.93896
95	1.52588	2.15381	2.40479	2.67871	2.55762	2.87012	3.91553
95.1	1.52588	2.146	2.40625	2.67725	2.56689	2.86084	3.90771
95.2	1.52588	2.14209	2.39453	2.66406	2.55518	2.83887	3.896
95.3	1.51807	2.13428	2.38428	2.64893	2.54492	2.82861	3.88574
95.4	1.50391	2.11621	2.35547	2.63428	2.51611	2.80127	3.84521
95.5	1.47754	2.11084	2.33203	2.61475	2.49658	2.78809	3.82568
95.6	1.48535	2.12109	2.33057	2.61328	2.49512	2.78662	3.82422
95.7	1.4751	2.10303	2.3125	2.59521	2.48486	2.771	3.79443
95.8	1.479	2.10547	2.30615	2.59521	2.47705	2.77246	3.78662
95.9	1.45947	2.09521	2.29297	2.57813	2.45752	2.74121	3.76709
96	1.46729	2.09521	2.29297	2.5874	2.46533	2.75293	3.75537
96.1	1.45313	2.08105	2.28125	2.56543	2.44336	2.71924	3.72803
96.2	1.43604	2.07568	2.28271	2.55615	2.42627	2.70215	3.72021
96.3	1.43604	2.07178	2.26416	2.54199	2.41455	2.69043	3.7085
96.4	1.4165	2.05225	2.24219	2.51563	2.40039	2.66943	3.68506
96.5	1.41797	2.05225	2.23975	2.51709	2.38574	2.6709	3.67725
96.6	1.4126	2.05225	2.22119	2.51709	2.3833	2.67236	3.66699
96.7	1.40479	2.04443	2.22266	2.50537	2.37549	2.67871	3.65381
96.8	1.39697	2.04443	2.22656	2.50928	2.37305	2.6709	3.646
96.9	1.3916	2.03271	2.21094	2.49756	2.35449	2.65918	3.63428
97	1.37744	2.0249	2.20313	2.5	2.35596	2.65137	3.62646
97.1	1.37354	2.01318	2.20313	2.50928	2.35596	2.63965	3.60303
97.2	1.36572	2.00146	2.19141	2.49756	2.3418	2.62793	3.5835
97.3	1.35645	1.99219	2.18359	2.48975	2.32324	2.61865	3.58594
97.4	1.33838	1.97412	2.17188	2.48584	2.30518	2.60059	3.56787
97.5	1.33057	1.97803	2.1665	2.48975	2.30762	2.59277	3.54834
97.6	1.31885	1.95459	2.16406	2.47021	2.30908	2.58105	3.53662
97.7	1.30713	1.95459	2.16406	2.46631	2.29736	2.56934	3.53662
97.8	1.30713	1.94434	2.15625	2.4585	2.29736	2.55225	3.51709
97.9	1.31885	1.93506	2.15625	2.45068	2.29102	2.56543	3.521
98	1.30713	1.9375	2.14453	2.42969	2.28564	2.56152	3.50537
98.1	1.30078	1.94678	2.13672	2.42871	2.27783	2.55371	3.51172
98.2	1.29932	1.93018	2.13037	2.41699	2.27002	2.53174	3.50439
98.3	1.27734	1.8999	2.10156	2.39844	2.23633	2.51074	3.46875
98.4	1.27441	1.89209	2.10791	2.3999	2.23486	2.50293	3.46777
98.5	1.26416	1.89453	2.10156	2.396	2.22314	2.49268	3.44531
98.6	1.25635	1.88965	2.09375	2.37646	2.20361	2.4873	3.44678
98.7	1.25781	1.88672	2.09375	2.38184	2.20361	2.47949	3.43896
98.8	1.25244	1.88037	2.08203	2.37646	2.19189	2.46777	3.43506
98.9	1.25098	1.88428	2.07422	2.36475	2.19189	2.45996	3.42725
99	1.24854	1.87646	2.07422	2.36865	2.18408	2.45996	3.43115
99.1	1.23438	1.87012	2.0625	2.35693	2.18408	2.44678	3.41553
99.2	1.2251	1.86084	2.05615	2.3374	2.17236	2.43408	3.396
99.3	1.21729	1.85303	2.0625	2.3374	2.16455	2.42871	3.40771
99.4	1.21338	1.85303	2.07031	2.32813	2.15283	2.41699	3.38818
99.5	1.21973	1.85303	2.0625	2.3374	2.14502	2.4209	3.38818
99.6	1.21973	1.84375	2.05713	2.32031	2.13818	2.41162	3.37109
99.7	1.2251	1.84131	2.0625	2.31543	2.14502	2.40918	3.36865
99.8	1.229	1.84521	2.05469	2.31006	2.13721	2.42334	3.37012
99.9	1.22656	1.83105	2.04053	2.28418	2.12305	2.41064	3.35449
100	1.21729	1.81641	2.03516	2.27881	2.10596	2.39355	3.34766
100.1	1.19775	1.82568	2.02588	2.25928	2.09814	2.37158	3.31006
100.2	1.19775	1.82178	2.02344	2.25781	2.08643	2.36084	3.30615
100.3	1.17432	1.81396	2.01563	2.24756	2.06689	2.34814	3.29834
100.4	1.17822	1.80615	2.01563	2.25146	2.06689	2.34521	3.29834
100.5	1.17432	1.80225	2.00391	2.22803	2.05518	2.33887	3.28662
100.6	1.1665	1.80225	1.99219	2.2085	2.04346	2.33105	3.27881
100.7	1.1665	1.79199	1.98584	2.2085	2.03564	2.32324	3.28027
100.8	1.1665	1.771	1.99219	2.19678	2.02393	2.31934	3.2749
100.9	1.16406	1.771	1.99219	2.18896	2.02393	2.31152	3.27344
101	1.16016	1.76855	1.97803	2.1748	2.00977	2.29736	3.26611
101.1	1.14307	1.75928	1.96875	2.16553	1.99268	2.28809	3.25537
101.2	1.14795	1.76172	1.96338	2.146	1.98877	2.28418	3.23438
101.3	1.15869	1.7749	1.97266	2.15234	1.99658	2.29199	3.24756
101.4	1.15479	1.771	1.97266	2.146	1.99268	2.28809	3.23584
101.5	1.14844	1.76172	1.95313	2.13818	1.98096	2.26855	3.22656
101.6	1.15479	1.75537	1.95313	2.12793	1.97559	2.26855	3.22803
101.7	1.14697	1.74902	1.93359	2.10938	1.97705	2.26074	3.2085
101.8	1.14307	1.75146	1.93213	2.11621	1.97314	2.24902	3.19678
101.9	1.14697	1.75	1.94531	2.09912	1.96533	2.26074	3.19678
102	1.13525	1.73584	1.93359	2.09912	1.95752	2.24121	3.17725
102.1	1.13135	1.73193	1.92188	2.09766	1.94189	2.22949	3.16553
102.2	1.12354	1.7373	1.92578	2.09912	1.93408	2.22021	3.16943
102.3	1.13135	1.73975	1.92188	2.09521	1.93408	2.22705	3.15381
102.4	1.12354	1.74365	1.91406	2.09912	1.93408	2.21777	3.15771
102.5	1.13281	1.74121	1.91162	2.08887	1.92383	2.20752	3.15527
102.6	1.11182	1.71875	1.90234	2.07568	1.9043	2.19824	3.13428
102.7	1.11182	1.70215	1.88037	2.06396	1.89893	2.1748	3.11475
102.8	1.11035	1.71094	1.86963	2.06641	1.90137	2.17725	3.10547
102.9	1.09766	1.69434	1.85303	2.0498	1.87695	2.16064	3.08887
103	1.1001	1.70068	1.85938	2.04443	1.87939	2.16699	3.0835
103.1	1.09229	1.68896	1.84766	2.03418	1.85986	2.15527	3.06396
103.2	1.09229	1.69287	1.85156	2.0249	1.8623	2.14746	3.07031
103.3	1.09229	1.68359	1.83984	2.01709	1.85205	2.14746	3.06787
103.4	1.0791	1.6875	1.83838	2.01172	1.85059	2.13428	3.05469
103.5	1.08447	1.68506	1.83203	1.99756	1.84424	2.12793	3.04053
103.6	1.06348	1.67334	1.8125	1.99756	1.83643	2.1084	3.02881
103.7	1.05713	1.66553	1.80078	1.97803	1.82471	2.09912	3.00928
103.8	1.04688	1.65381	1.79297	1.96631	1.81689	2.08252	2.98975
103.9	1.05713	1.65771	1.78516	1.97021	1.80518	2.07959	2.98975
104	1.04541	1.646	1.78516	1.95703	1.79736	2.05371	2.97021
104.1	1.04297	1.63184	1.771	1.93652	1.79102	2.04736	2.95752
104.2	1.02197	1.6084	1.75	1.91553	1.78174	2.01855	2.93506
104.3	1.0166	1.60791	1.75635	1.92188	1.77393	2.0249	2.92969
104.4	1.02588	1.63428	1.76172	1.92725	1.77637	2.03027	2.92725
104.5	1.01172	1.61768	1.74756	1.91699	1.76904	2.00977	2.91309
104.6	1.00244	1.59131	1.74219	1.90527	1.75049	2.00684	2.896
104.7	0.994629	1.5835	1.73047	1.88818	1.74268	1.99902	2.88818
104.8	1.00244	1.57959	1.73047	1.88428	1.73877	1.99512	2.87256
104.9	0.990723	1.57031	1.71875	1.87256	1.73096	1.97412	2.85303
105	1.00244	1.58105	1.72266	1.87646	1.7334	1.97168	2.84521
105.1	1.00244	1.56006	1.71875	1.87109	1.73096	1.96777	2.84521
105.2	1.00244	1.57178	1.71875	1.86865	1.73486	1.95996	2.8374
105.3	1.00635	1.57178	1.72266	1.86865	1.73486	1.95215	2.82568
105.4	0.994629	1.56396	1.71094	1.86084	1.73486	1.94043	2.81787
105.5	1.00244	1.55859	1.71094	1.85693	1.7207	1.94043	2.81396
105.6	0.989258	1.53125	1.70947	1.85693	1.7124	1.92725	2.80469
105.7	0.994629	1.5249	1.70313	1.85938	1.71289	1.91309	2.79053
105.8	0.994629	1.5249	1.70313	1.84912	1.70361	1.91309	2.78662
105.9	0.993164	1.51318	1.69141	1.83496	1.69434	1.88965	2.7749
106	0.975098	1.50293	1.67188	1.81787	1.6958	1.88184	2.76709
106.1	0.967285	1.48438	1.67188	1.81787	1.68408	1.87012	2.74756
106.2	0.979004	1.4834	1.67188	1.81006	1.67627	1.87402	2.74756
106.3	0.96875	1.46875	1.66406	1.81006	1.66455	1.8623	2.72803
106.4	0.975098	1.46631	1.65234	1.7959	1.66455	1.85449	2.7085
106.5	0.972656	1.45996	1.6499	1.77246	1.66211	1.84814	2.70215
106.6	0.976074	1.45703	1.65332	1.76953	1.66699	1.84131	2.69775
106.7	0.967285	1.45459	1.64453	1.76563	1.66211	1.84277	2.68115
106.8	0.975098	1.4624	1.65234	1.75537	1.65283	1.83887	2.67725
106.9	0.975098	1.44287	1.64453	1.74756	1.64111	1.82861	2.66943
107	0.976563	1.45459	1.63672	1.74756	1.64502	1.81934	2.66699
107.1	0.955566	1.44678	1.625	1.74756	1.6333	1.81152	2.6499
107.2	0.955566	1.43506	1.61084	1.74756	1.62158	1.7998	2.63818
107.3	0.955566	1.44678	1.60547	1.73975	1.6333	1.79199	2.63818
107.4	0.955566	1.43262	1.59375	1.73975	1.62402	1.78027	2.61865
107.5	0.955566	1.42334	1.58203	1.73975	1.60596	1.77881	2.62646
107.6	0.954102	1.41162	1.57275	1.72803	1.59424	1.75293	2.60938
107.7	0.936035	1.41162	1.55469	1.72559	1.59424	1.74268	2.61084
107.8	0.925781	1.40381	1.54297	1.70459	1.57471	1.74902	2.58496
107.9	0.916504	1.39209	1.53271	1.69678	1.57227	1.72949	2.56787
108	0.916504	1.39355	1.52344	1.69531	1.55518	1.73975	2.57959
108.1	0.916504	1.37256	1.51563	1.68115	1.55518	1.71387	2.56006
108.2	0.916504	1.36475	1.50391	1.6709	1.54346	1.71387	2.56006
108.3	0.916504	1.36084	1.49219	1.68506	1.54346	1.70996	2.55615
108.4	0.916504	1.35938	1.50391	1.68896	1.54346	1.71387	2.54834
108.5	0.914063	1.34521	1.49365	1.67725	1.53418	1.69971	2.54834
108.6	0.896973	1.34521	1.47266	1.66797	1.52783	1.68262	2.54053
108.7	0.885254	1.33105	1.47266	1.6499	1.51758	1.6709	2.51709
108.8	0.894531	1.32324	1.47021	1.65918	1.51221	1.68018	2.51611
108.9	0.88916	1.32813	1.46875	1.65527	1.51221	1.67871	2.50146
109	0.890137	1.32031	1.479	1.67188	1.51221	1.67725	2.50635
109.1	0.877441	1.30615	1.45313	1.65771	1.4873	1.6499	2.50684
109.2	0.877441	1.30615	1.46338	1.66943	1.48633	1.64355	2.49609
109.3	0.878906	1.30518	1.44678	1.65137	1.47852	1.63721	2.47168
109.4	0.893066	1.30225	1.45313	1.66553	1.48096	1.63965	2.47803
109.5	0.885254	1.29053	1.44141	1.65381	1.47314	1.62939	2.46631
109.6	0.885254	1.30225	1.44531	1.65771	1.47314	1.62012	2.46631
109.7	0.885254	1.30078	1.44385	1.65869	1.47559	1.62256	2.46875
109.8	0.885254	1.30225	1.45313	1.65771	1.47314	1.62012	2.46631
109.9	0.873535	1.30225	1.44141	1.65771	1.47314	1.62012	2.44678
110	0.883789	1.30225	1.44287	1.65771	1.47314	1.61768	2.4585
110.1	0.877441	1.30225	1.42432	1.65137	1.46533	1.60059	2.43896
110.2	0.873535	1.30225	1.43115	1.65234	1.46143	1.59521	2.43506
110.3	0.865723	1.29053	1.41016	1.63965	1.45361	1.58105	2.42725
110.4	0.877441	1.30225	1.41406	1.646	1.45361	1.58105	2.42725
110.5	0.865723	1.29443	1.40088	1.63818	1.4458	1.58105	2.41943
110.6	0.865723	1.28271	1.38281	1.62646	1.43408	1.56152	2.40771
110.7	0.855469	1.26855	1.37256	1.61475	1.42383	1.55127	2.39746
110.8	0.846191	1.25146	1.35156	1.60693	1.40283	1.53027	2.37646
110.9	0.839844	1.25928	1.35156	1.61475	1.39893	1.52637	2.38428
111	0.822754	1.24756	1.35156	1.59521	1.39111	1.51855	2.37646
111.1	0.821289	1.24609	1.33838	1.59375	1.38965	1.50537	2.36328
111.2	0.814941	1.24609	1.33594	1.59912	1.3833	1.49121	2.35693
111.3	0.814941	1.24365	1.32178	1.5874	1.37549	1.49121	2.34912
111.4	0.807129	1.24365	1.29297	1.57959	1.36377	1.47314	2.3374
111.5	0.79541	1.23584	1.28125	1.57959	1.35596	1.46777	2.32959
111.6	0.783691	1.22412	1.28125	1.56787	1.34424	1.45996	2.31787
111.7	0.787598	1.23584	1.28516	1.57422	1.35596	1.45215	2.32178
111.8	0.787598	1.22803	1.27197	1.57178	1.34814	1.43896	2.31006
111.9	0.775879	1.21631	1.25928	1.57178	1.33643	1.4248	2.30225
112	0.775879	1.22412	1.27197	1.57959	1.33252	1.41455	2.29834
112.1	0.775879	1.2124	1.26709	1.56152	1.32471	1.40918	2.28662
112.2	0.76416	1.20459	1.26025	1.56787	1.32471	1.39746	2.27881
112.3	0.775879	1.20459	1.26563	1.56006	1.32471	1.40137	2.28027
112.4	0.768066	1.19678	1.24756	1.54834	1.31689	1.38965	2.27881
112.5	0.76416	1.20459	1.26172	1.54834	1.31299	1.39209	2.28662
112.6	0.76416	1.19287	1.24072	1.53662	1.31299	1.38965	2.2749
112.7	0.756348	1.18506	1.23438	1.53662	1.29346	1.38184	2.25537
112.8	0.756348	1.19678	1.23584	1.54053	1.30518	1.38184	2.26953
112.9	0.756348	1.18506	1.23438	1.52881	1.29346	1.3623	2.26709
113	0.744629	1.17725	1.22266	1.52881	1.28564	1.3623	2.25928
113.1	0.736816	1.16553	1.21484	1.50928	1.27393	1.35059	2.25928
113.2	0.744629	1.17334	1.21094	1.51709	1.27393	1.35059	2.25537
113.3	0.744629	1.16162	1.20313	1.50537	1.26221	1.33887	2.24756
113.4	0.744629	1.16699	1.20557	1.50928	1.26611	1.34277	2.24756
113.5	0.744629	1.17334	1.20313	1.49756	1.25439	1.3335	2.24756
113.6	0.738281	1.16309	1.19678	1.49902	1.25586	1.33643	2.24121
113.7	0.739258	1.17578	1.19775	1.50391	1.26074	1.3374	2.25391
113.8	0.73291	1.1499	1.18359	1.48584	1.25439	1.31934	2.23584
113.9	0.73291	1.1499	1.17188	1.47412	1.24268	1.31152	2.22803
114	0.736816	1.16162	1.17578	1.47803	1.24268	1.31299	2.22803
114.1	0.736816	1.15381	1.16553	1.46631	1.24268	1.31152	2.21875
114.2	0.725098	1.14453	1.17188	1.4585	1.2373	1.2998	2.22021
114.3	0.736816	1.15381	1.17578	1.47021	1.2583	1.30371	2.22021
114.4	0.736816	1.146	1.1665	1.45703	1.24658	1.29199	2.2124
114.5	0.73291	1.14209	1.16943	1.4585	1.24658	1.28027	2.21777
114.6	0.736816	1.146	1.16406	1.4624	1.24658	1.28271	2.2085
114.7	0.736816	1.13428	1.15479	1.45068	1.24414	1.28418	2.2085
114.8	0.725098	1.12646	1.15381	1.44287	1.22705	1.26465	2.20068
114.9	0.717285	1.11621	1.13281	1.43115	1.21533	1.26611	2.20068
115	0.726563	1.12402	1.14209	1.44043	1.21924	1.27002	2.19824
115.1	0.719727	1.11719	1.13916	1.42725	1.2334	1.2749	2.20313
115.2	0.725098	1.12256	1.13525	1.43896	1.22705	1.26318	2.20313
115.3	0.717285	1.11328	1.13672	1.42578	1.21533	1.27246	2.20068
115.4	0.705566	1.12012	1.125	1.40918	1.20508	1.26465	2.18896
115.5	0.708008	1.10547	1.11328	1.3999	1.18408	1.26465	2.18115
115.6	0.722656	1.11084	1.11328	1.396	1.19434	1.24902	2.18896
115.7	0.708008	1.10303	1.11328	1.38818	1.19336	1.25049	2.1748
115.8	0.705566	1.10303	1.11328	1.38818	1.17236	1.24756	2.16016
115.9	0.717285	1.10303	1.11328	1.38818	1.17627	1.25293	2.16943
116	0.717285	1.10303	1.10547	1.38037	1.16455	1.24121	2.16943
116.1	0.705566	1.10303	1.09375	1.36865	1.16455	1.24268	2.16162
116.2	0.709473	1.10693	1.10547	1.36865	1.16455	1.25537	2.16162
116.3	0.71875	1.10449	1.11475	1.37012	1.17383	1.26221	2.15918
116.4	0.713379	1.11084	1.12109	1.36475	1.17236	1.26855	2.15771
116.5	0.719727	1.11719	1.11572	1.36865	1.1748	1.28271	2.16943
116.6	0.729004	1.11475	1.125	1.35693	1.17627	1.28418	2.15234
116.7	0.717285	1.11475	1.125	1.34912	1.16455	1.28418	2.16162
116.8	0.722656	1.1084	1.11865	1.34375	1.17236	1.28027	2.15527
116.9	0.705566	1.09375	1.104	1.32568	1.16455	1.26855	2.146
117	0.71875	1.11621	1.12646	1.33105	1.16455	1.27393	2.15137
117.1	0.713379	1.11084	1.13281	1.32568	1.15674	1.28027	2.146
117.2	0.721191	1.11621	1.14063	1.3335	1.15283	1.27637	2.15381
117.3	0.725098	1.11084	1.14063	1.3374	1.15283	1.28027	2.15771
117.4	0.725098	1.09912	1.13037	1.3374	1.14502	1.27783	2.146
117.5	0.723633	1.10791	1.13135	1.33594	1.15527	1.26709	2.15625
117.6	0.744629	1.11475	1.15234	1.35693	1.16455	1.28809	2.16553
117.7	0.731445	1.1123	1.15234	1.34668	1.1543	1.26709	2.15771
117.8	0.726563	1.09131	1.14063	1.32568	1.14502	1.25293	2.146
117.9	0.736816	1.10303	1.15088	1.3374	1.14502	1.25293	2.14746
118	0.735352	1.09375	1.14453	1.32959	1.14502	1.24121	2.13818
118.1	0.736816	1.10059	1.14453	1.3374	1.15283	1.23877	2.13428
118.2	0.734375	1.09131	1.13281	1.32422	1.1333	1.22949	2.13428
118.3	0.713379	1.09131	1.13281	1.30615	1.1333	1.21777	2.12646
118.4	0.705566	1.09131	1.13281	1.29834	1.12549	1.2085	2.11475
118.5	0.705566	1.09131	1.14453	1.31006	1.12549	1.21533	2.12646
118.6	0.713379	1.09912	1.14453	1.30615	1.1333	1.21631	2.125
118.7	0.722656	1.10156	1.15625	1.31006	1.12549	1.22168	2.11865
118.8	0.693848	1.09521	1.14209	1.29834	1.12549	1.21143	2.10693
118.9	0.704102	1.09375	1.14307	1.30859	1.12402	1.20068	2.10693
119	0.699219	1.10059	1.1499	1.30762	1.12305	1.20752	2.10303
119.1	0.694824	1.09766	1.14307	1.31396	1.11377	1.20459	2.08984
119.2	0.697754	1.09521	1.14453	1.31641	1.10596	1.20215	2.09131
119.3	0.693848	1.10303	1.15088	1.31006	1.10059	1.2085	2.09912
119.4	0.693848	1.09521	1.13037	1.29834	1.09424	1.20215	2.0874
119.5	0.697754	1.10449	1.13281	1.31006	1.09424	1.20215	2.09131
119.6	0.709473	1.09521	1.13672	1.31006	1.09814	1.20605	2.10059
119.7	0.697754	1.09521	1.13428	1.31006	1.09814	1.19189	2.07959
119.8	0.705566	1.10303	1.12109	1.31006	1.08643	1.18262	2.07568
119.9	0.697754	1.10303	1.11963	1.30762	1.08398	1.18262	2.06787
120	0.686035	1.10303	1.11328	1.28662	1.06543	1.16846	2.06787
120.1	0.695313	1.10156	1.125	1.29688	1.07861	1.1709	2.06787
120.2	0.686035	1.08496	1.11719	1.29053	1.06445	1.16162	2.06006
120.3	0.679688	1.06543	1.10449	1.29199	1.05664	1.14502	2.04834
120.4	0.682129	1.07178	1.10938	1.29834	1.05127	1.15918	2.0459
120.5	0.680664	1.06006	1.10791	1.28662	1.0498	1.14502	2.0249
120.6	0.683594	1.06934	1.10547	1.29834	1.04346	1.146	2.02881
120.7	0.662598	1.05225	1.09375	1.27637	1.04346	1.12939	2.01563
120.8	0.65332	1.05225	1.09375	1.26709	1.03564	1.10693	1.99512
120.9	0.635254	1.04053	1.07959	1.25537	1.02393	1.09277	1.97803
121	0.637695	1.05322	1.07275	1.25537	1.02393	1.08887	1.97412
121.1	0.65625	1.07324	1.09229	1.26709	1.02393	1.10303	1.98047
121.2	0.633789	1.05078	1.07178	1.25781	1.01611	1.10205	1.97412
121.3	0.626465	1.03564	1.05615	1.26611	1.00439	1.07471	1.95996
121.4	0.625	1.05078	1.0625	1.271	1.00977	1.05127	1.95996
121.5	0.608887	1.04834	1.0625	1.2915	1.01074	1.03662	1.96484
121.6	0.635254	1.05615	1.06738	1.30615	1.04199	1.06006	1.98438
121.7	0.63916	1.04053	1.07324	1.2998	1.02539	1.0708	1.96533
121.8	0.649414	1.04688	1.07275	1.30859	1.02637	1.07422	1.95801
121.9	0.657715	1.07324	1.08203	1.31787	1.04492	1.0918	1.96924
122	0.657227	1.05078	1.07178	1.29199	1.02246	1.0835	1.96484
122.1	0.668945	1.0459	1.06104	1.27979	1.02539	1.10449	1.9624
122.2	0.693848	1.05225	1.06641	1.28418	1.02393	1.1084	1.96777
122.3	0.696777	1.05469	1.09375	1.27637	1.02393	1.1123	1.98047
122.4	0.697266	1.06396	1.08447	1.25635	1.01465	1.09912	1.98975
122.5	0.717285	1.06006	1.09131	1.26074	1.01611	1.09277	1.98193
122.6	0.70459	1.04834	1.08447	1.26465	1.00195	1.08252	1.94824
122.7	0.710938	1.02783	1.09131	1.25781	1.00195	1.09814	1.95703
122.8	0.700195	1.00781	1.08203	1.25928	0.977051	1.07178	1.95459
122.9	0.686035	1.00146	1.07422	1.21631	0.956055	1.04199	1.92725
123	0.680664	1	1.07275	1.19287	0.959961	1.0459	1.92578
123.1	0.685059	1.00439	1.09277	1.18262	0.964355	1.03174	1.91846
123.2	0.672852	0.989746	1.07275	1.17725	0.95752	1.03809	1.91162
123.3	0.680664	0.994629	1.05322	1.19141	0.974121	1.03271	1.88672
123.4	0.677246	0.987305	1.0498	1.19824	0.973633	1.04199	1.88184
123.5	0.678223	0.996582	1.05713	1.17871	0.967773	1.03711	1.88428
123.6	0.649414	0.973633	1.04541	1.15479	0.956055	1.01025	1.88135
123.7	0.652344	0.996582	1.06787	1.16309	0.976074	1.0332	1.89893
123.8	0.633789	0.98291	1.07666	1.16943	0.964844	1.01953	1.89063
123.9	0.632813	0.991211	1.09277	1.17725	0.983887	1.01758	1.89746
124	0.625977	0.983398	1.08301	1.16553	0.975586	1.00293	1.90381
124.1	0.630371	0.989746	1.09521	1.16309	0.980957	1.01709	1.8999
124.2	0.611816	0.992188	1.07031	1.1499	0.955078	1.00049	1.87793
124.3	0.60791	0.997559	1.06006	1.12646	0.959961	0.999023	1.88672
124.4	0.592285	0.983398	1.05078	1.12646	0.943359	0.999023	1.88428
124.5	0.593262	0.990723	1.04248	1.125	0.950684	1.00146	1.88525
124.6	0.597656	0.983398	1.05371	1.1084	0.945801	1.01074	1.88965
124.7	0.604004	0.993652	1.0625	1.12109	0.955078	1.01074	1.90771
124.8	0.602539	0.989746	1.05322	1.13037	0.930176	1.01074	1.89844
124.9	0.588379	0.975586	1.03516	1.12793	0.906738	1.01074	1.88184
125	0.587402	0.972656	1.03418	1.10693	0.904297	1.00439	1.88818
125.1	0.583984	0.984375	1.04004	1.11328	0.893555	1.00781	1.896
125.2	0.605469	1.00293	1.04297	1.1084	0.916992	1.01611	1.89844
125.3	0.589844	0.996094	1.03662	1.10938	0.925293	1.01074	1.90771
125.4	0.597656	1.00684	1.04297	1.11621	0.919922	0.999023	1.89746
125.5	0.59082	1.01172	1.0415	1.09375	0.901367	0.997559	1.88672
125.6	0.596191	1.01221	1.02881	1.08496	0.891113	0.990234	1.87402
125.7	0.610352	0.998535	1.01953	1.07568	0.887207	0.988281	1.8623
125.8	0.635254	1.01709	1.02881	1.0835	0.883301	0.996582	1.86084
125.9	0.652344	1.02246	1.02197	1.07178	0.875488	1.0083	1.84521
126	0.60791	1.00537	1.04443	1.09521	0.887207	0.992188	1.85547
126.1	0.659668	1.05469	1.04785	1.09766	0.883301	1.03418	1.88037
126.2	0.648438	1.02637	1.0249	1.09912	0.885742	1.00439	1.85449
126.3	0.666504	1.04688	1.04297	1.09668	0.905762	1.01074	1.87646
126.4	0.666504	1.05615	1.03369	1.0874	0.903809	1.00293	1.875
126.5	0.667969	1.05615	1.01709	1.08887	0.888672	0.991211	1.88037
126.6	0.678223	1.04346	1.01172	1.09521	0.89502	0.995117	1.87012
126.7	0.688477	1.04785	1.00635	1.09619	0.888184	0.989746	1.85938
126.8	0.693848	1.06689	0.997559	1.12256	0.879883	0.969238	1.86475
126.9	0.686035	1.06934	0.974121	1.25146	0.871582	0.953613	1.8623
127	0.657715	1.02637	0.885742	1.52002	0.859863	0.913574	1.77246
127.1	0.60498	0.991699	0.601074	1.14551	0.803711	0.81543	1.44385
127.2	0.693848	1.16162	1.00391	1.28027	0.952148	1.06641	1.896
127.3	0.671387	1.1875	1.11035	1.21582	0.948242	1.10205	1.91943
127.4	0.825684	1.19873	1.18506	1.53662	0.981445	1.02051	1.95605
127.5	0.762695	0.978027	1.00635	1.95801	0.779297	0.819336	1.63281
127.6	0.966309	1.05518	1.04834	0.961426	1.05762	0.849121	1.08008
127.7	1.47119	1.19873	1.62939	1.18945	1.8457	0.874512	2.5083
127.8	1.23975	1.16016	1.46582	1.19971	1.03467	1.03271	2.2085
127.9	0.774902	0.997559	1.00781	1.15234	0.952637	0.994141	1.87256
128	0.775879	1.07031	1.07813	1.29834	0.913086	0.996582	1.9624
128.1	0.760254	1.01855	1.05615	1.26563	0.871582	0.9375	1.88037
128.2	0.769043	0.988281	1.06982	1.24756	0.881836	0.993652	1.8374
128.3	0.790039	1.0166	1.11572	1.22656	0.935059	1.10059	1.82178
128.4	0.812988	1.13818	1.10547	1.17676	0.902344	1.10547	1.80566
128.5	1.3457	1.77686	1.61426	1.6001	1.31299	0.955566	2.31396
128.6	-0.541992	0.199219	0.53125	1.17041	0.732422	1.18359	0.901367
128.7	0.452148	1.00195	1.15088	1.26367	0.952148	0.995605	0.725586
128.8	0.585938	1.00293	1.13086	1.35449	0.992676	1.06348	1.60742
128.9	0.502441	1.00879	0.908203	1.28467	0.981934	1.04297	1.71729
129	0.568848	1.05859	0.996094	1.31787	0.953613	1.06006	1.7168
129.1	0.633789	1.10938	1.02979	1.29834	0.932617	1.05762	1.80469
129.2	0.650879	1.14697	1.08057	1.29688	0.952148	1.10059	1.85693
129.3	0.633789	1.14844	1.04541	1.23828	0.934082	1.03809	1.84766
129.4	0.632813	1.16846	1.05371	1.24268	0.929199	1.02783	1.83887
129.5	0.686035	1.17188	1.0415	1.20459	0.950684	1.04443	1.82178
129.6	0.665039	1.1709	1.04932	1.2085	0.941895	1.01709	1.79443
129.7	0.674316	1.20703	1.04443	1.22021	0.970703	1.05664	1.82959
129.8	0.654785	1.20605	0.998535	1.22266	0.965332	1.03809	1.80371
129.9	0.649414	1.20557	1.02197	1.24756	0.983398	1.04297	1.79541
130	0.625	1.17334	1.02588	1.24365	1.01074	1.06641	1.78906
130.1	0.561523	1.16602	1.0957	1.27393	1.02148	1.13623	1.79492
130.2	0.182129	1.03271	0.571289	1.0874	0.95752	0.942383	1.5127
130.3	-0.122559	1.12598	0.13916	1.13232	1.01611	0.85791	0.999512
130.4	1.20654	1.55078	1.41211	1.35254	1.2959	0.760742	2.38672
130.5	1.08594	1.00537	0.98877	1.21436	0.811035	0.845703	2.41553
130.6	1.15234	1.29688	1.13721	1.2749	1.10059	1.021	2.26709
130.7	0.751465	1.07617	0.943848	1.27881	0.844238	1.0542	1.84961
130.8	0.65918	1.24023	1.03369	1.24365	0.948242	1.1084	1.6875
130.9	0.57666	1.34033	1.16699	1.19141	1.10596	0.872559	1.94678
131	-0.308105	0.112793	0.238281	1.08398	0.271484	1.25732	1.10498
131.1	0.344727	0.83252	0.810059	1.05713	0.807617	0.927734	0.328613
131.2	0.48584	1.1084	0.777344	1.19189	0.879395	0.916992	1.59277
131.3	0.419922	1.01025	0.771973	1.1001	0.848145	0.885742	1.5791
131.4	0.507813	1.03809	0.824219	1.20215	0.891113	0.895996	1.76465
131.5	0.529785	1.00146	0.820313	1.17578	0.855957	0.927246	1.70703
131.6	0.557129	1.01709	0.868652	1.16943	0.870117	0.963867	1.74365
131.7	0.640137	1.06494	0.860352	1.21973	0.914551	1.02344	1.80078
131.8	0.561523	1.06934	0.855957	1.06982	0.851074	1.02002	1.79736
131.9	0.386719	0.929199	0.719238	1.17529	0.713379	0.905273	1.57227
132	-0.0107422	0.366699	0.567383	1.13623	0.477051	1.33838	0.925293
132.1	0.344727	0.633301	0.821777	0.92627	0.663574	0.771484	0.590332
132.2	0.438477	0.770996	0.791016	0.932129	0.588867	0.726563	1.54639
132.3	0.542969	0.790527	0.872559	1.08105	0.673828	0.87793	1.76221
132.4	0.504883	0.789063	0.85791	1.07031	0.717773	0.905273	1.74365
132.5	0.507324	0.887695	0.894043	1.07275	0.787598	0.960938	1.72754
132.6	0.539063	0.983398	0.950195	1.10986	0.894043	0.925781	1.82959
132.7	0.515625	1.05762	0.912598	1.00293	0.898926	0.841309	1.88037
132.8	0.578125	0.889648	0.802246	0.838867	0.745605	0.594238	1.729
132.9	-0.262207	0.316406	0.275879	0.540527	0.270996	0.682617	0.914063
133	0.0273438	0.522461	0.37793	0.575684	0.193359	0.490234	0.584961
133.1	0.0742188	0.32959	0.230469	0.655273	0.0424805	0.228027	0.885742
133.2	2.05566	1.88428	1.48828	1.13672	1.24121	0.459961	2.77344
133.3	0.484375	0.626465	0.975098	0.849121	0.750488	0.436523	2.92236
133.4	0.486816	0.849121	0.820313	0.692871	0.602051	0.624023	1.50928
133.5	0.675781	0.936523	0.864746	0.827148	0.691895	0.655273	1.42578
133.6	0.614258	0.858398	0.846191	0.908691	0.734863	0.70459	1.57031
133.7	0.441406	0.70459	0.720215	0.891113	0.595703	0.644043	1.41455
133.8	0.537598	0.720215	0.663086	0.902344	0.67627	0.57959	1.33203
133.9	0.725586	0.934082	0.713867	0.972168	0.813477	0.547363	1.66064
134	1.59229	1.67139	1.54688	1.36084	1.54395	0.535645	2.7417
134.1	1.78369	1.45068	1.48047	1.04443	1.32959	0.570801	3.68994
134.2	0.453125	0.478516	0.428711	0.77002	0.466797	0.855957	2.1167
134.3	-2.63965	-1.59082	-1.77441	0.122559	-1.47754	0.969238	-1.94287
134.4	0.283203	0.683594	0.772949	0.834473	0.669434	0.644531	-1.604
134.5	0.730957	0.726074	0.718262	0.96875	0.807617	0.794434	1.67334
134.6	0.57959	0.606934	0.754395	0.924805	0.705078	0.701172	1.58789
134.7	0.472656	0.677246	0.707031	0.911621	0.662109	0.609863	1.47168
134.8	0.379883	0.692383	0.661133	0.907715	0.595215	0.506836	1.35547
134.9	0.562012	0.895996	0.84375	0.928223	0.78418	0.490723	1.52588
135	1.0127	1.18066	1.10889	1.07422	1.14063	0.342773	2.09619
135.1	0.700195	0.8125	0.666504	0.811035	0.755371	0.367188	2.42578
135.2	0.717773	0.893555	0.757813	1.021	0.824707	0.45752	1.8623
135.3	0.59375	0.76709	0.691406	0.966309	0.525879	0.411133	1.78955
135.4	0.504395	0.76709	0.615234	0.905762	0.592773	0.369629	1.62061
135.5	0.487305	0.831543	0.575684	0.903809	0.641113	0.362793	1.65967
135.6	0.460938	0.795898	0.481934	0.807617	0.650391	0.387207	1.65674
135.7	0.421875	0.838867	0.475098	0.858398	0.650391	0.375488	1.61475
135.8	0.368652	0.737305	0.573242	0.950684	0.641113	0.405273	1.51221
135.9	0.266602	0.671875	0.443848	0.881836	0.480957	0.475586	1.32031
136	0.223633	0.663086	0.381348	0.771973	0.353516	0.582031	1.16553
136.1	0.243652	0.651367	0.278809	0.65918	0.273926	0.543457	1.02002
136.2	0.373047	0.70166	0.400879	0.787598	0.381836	0.493652	1.06885
136.3	0.417969	0.665527	0.5	0.838867	0.453613	0.55127	1.24512
136.4	0.454102	0.679688	0.511719	0.865723	0.516113	0.558594	1.3335
136.5	0.45166	0.685059	0.54541	0.899902	0.531738	0.555176	1.35547
136.6	0.480469	0.687988	0.540527	0.885742	0.526367	0.53418	1.37646
136.7	0.473633	0.662598	0.584473	0.854492	0.496582	0.532715	1.36475
136.8	0.46875	0.578613	0.584961	0.821777	0.498047	0.513672	1.33105
136.9	0.416504	0.570313	0.49707	0.876465	0.492676	0.446777	1.35547
137	0.385254	0.554688	0.518066	0.867188	0.50293	0.419434	1.33496
137.1	0.390625	0.561523	0.530273	0.727051	0.490234	0.408203	1.29199
137.2	0.504883	0.683594	0.643066	0.869629	0.61377	0.5	1.43848
137.3	0.5	0.664551	0.651367	0.856934	0.623047	0.504395	1.43408
137.4	0.49707	0.614746	0.71582	0.849121	0.350586	0.566895	1.4248
137.5	0.469727	0.529785	0.725098	0.810059	0.285645	0.563965	1.38916
137.6	0.428223	0.29834	0.708496	0.810059	0.0302734	0.561523	1.33887
137.7	0.447754	0.713867	0.756348	0.853027	0.137207	0.595215	1.24365
137.8	0.428223	0.910156	0.743652	0.835938	0.664551	0.608398	1.24365
137.9	0.417969	0.987305	0.714844	0.821777	0.727051	0.569336	1.24219
138	0.342285	0.880371	0.518066	0.845215	0.58252	0.401367	1.10449
138.1	0.387695	0.816406	0.497559	0.849121	0.55127	0.37793	1.34131
138.2	0.424316	0.803711	0.615723	0.86084	0.56543	0.402832	1.41797
138.3	0.418945	0.785156	0.666504	0.890625	0.577148	0.489746	1.42578
138.4	0.419434	0.776367	0.666992	0.913086	0.580078	0.531738	1.40137
138.5	0.444824	0.777344	0.654785	0.929688	0.600586	0.542969	1.43359
138.6	0.46875	0.785156	0.667969	0.94043	0.602051	0.56543	1.44043
138.7	0.492188	0.791992	0.671875	0.945313	0.619141	0.581055	1.44678
138.8	0.498535	0.790527	0.699219	0.952148	0.641113	0.620117	1.45459
138.9	0.546387	0.796875	0.736816	0.990723	0.657715	0.671875	1.51172
139	0.497559	0.78418	0.714844	0.963867	0.646484	0.637207	1.53271
139.1	0.490723	0.770996	0.720215	0.956055	0.623047	0.639648	1.53418
139.2	0.47998	0.746094	0.705566	0.917969	0.594238	0.639648	1.50244
139.3	0.519531	0.772461	0.73584	0.959961	0.620117	0.700684	1.5459
139.4	0.53125	0.795898	0.738281	0.967773	0.624512	0.724609	1.56006
139.5	0.567383	0.803223	0.757813	0.988281	0.635742	0.731934	1.57959
139.6	0.611816	0.842773	0.818848	1.02734	0.691895	0.780273	1.61475
139.7	0.585938	0.850586	0.799805	1.03809	0.654297	0.754395	1.6084
139.8	0.62207	0.888184	0.877441	1.0874	0.723145	0.82959	1.67188
139.9	0.619629	0.936035	0.885254	1.12109	0.759277	0.874023	1.70068
140	0.661133	0.989746	0.935059	1.1709	0.812988	0.94043	1.75146
140.1	0.6875	0.989746	0.990723	1.21875	0.836426	0.959961	1.80225
140.2	0.707031	0.996582	0.98584	1.2373	0.847168	0.963867	1.82715
140.3	0.711914	1.03516	1.01025	1.27197	0.893555	1.01465	1.87256
140.4	0.678223	1.04297	0.972656	1.27734	0.901367	1.01465	1.84131
140.5	0.654785	1.14453	0.990723	1.34375	0.923828	0.983398	1.82178
140.6	0.300293	1.10059	0.713867	1.08496	0.612305	0.72168	1.4585
140.7	-0.776855	0.8125	-0.497559	-0.178711	-0.407715	-0.525879	-0.0571289
140.8	0.969727	2.10547	1.60547	1.66406	1.87402	1.58594	0.671875
140.9	1.43506	1.48877	1.66699	2.06934	1.66357	2.54102	2.23486
141	1.44482	1.4165	1.61914	2.10645	1.6665	1.8125	4.08691
141.1	0.295898	1.18701	0.625	1.01123	0.913574	0.745605	2.46826
141.2	0.413574	1.23975	0.727539	1.07422	0.854492	0.780273	1.49121
141.3	0.547852	1.2417	0.768066	1.1875	0.885742	0.79834	1.2002
141.4	0.73584	1.30078	0.973145	1.38867	1.06543	0.999512	1.44336
141.5	0.941406	1.3335	1.13721	1.53516	1.18652	1.10449	1.68262
141.6	0.90625	1.27637	1.18115	1.55908	1.20508	1.12158	1.86475
141.7	0.858887	1.22656	1.19385	1.47656	1.15527	1.12646	1.92041
141.8	0.832031	1.19678	1.26953	1.48975	1.16602	1.13965	1.97803
141.9	0.846191	1.1958	1.31006	1.49365	1.13086	1.19043	2.04443
142	0.828125	1.12256	1.33594	1.47559	1.10986	1.17871	2.05615
142.1	0.818848	1.08984	1.3501	1.45459	1.09424	1.1748	2.05225
142.2	0.894043	1.11865	1.41113	1.50146	1.13184	1.24609	2.09863
142.3	1.00488	1.1084	1.47021	1.5249	1.13086	1.36621	2.21387
142.4	1.09082	1.10156	1.4375	1.50537	1.12158	1.44141	2.2666
142.5	1.125	1.12646	1.40381	1.50146	1.1333	1.50195	2.34131
142.6	1.03662	1.15527	1.35693	1.49219	1.12549	1.42773	2.37256
142.7	0.863281	1.18359	1.34375	1.52881	1.1748	1.28809	2.35645
142.8	0.728027	1.20996	1.31006	1.55127	1.19336	1.17139	2.17188
[truncated: 698 more rows]

## Sheet: Figure 2D - Apcin 4-1 isotherm
[Apcin] (μM)	Response Units (RU)
0.156	5.97618
0.313	8.93154
0.625	11.7257
1.25	14.1146
2.5	16.2654
5	17.9594
10	20.1961
