# Supplementary material for: Development of D-box peptides to inhibit the anaphase-promoting complex/cyclosome
Source: eLife. 2025 Sep 1;14:RP104238. doi: 10.7554/eLife.104238 (PMC12401543; doi:10.7554/eLife.104238)
Supplement: Figure 3—source data 1. [file elife-104238-fig3-data1.xlsx]

## Sheet: Figure 3B - delta Tm plots
	Difference in Cdc20 melting temperatures compared to vehicle control with different peptides from technical triplicates
	25 μM			50 μM			100 μM
D1	0.43	0.43	0.26	1.22	0.7	1.13	2	2	1.82
D2	0.455557	0.728887	0.455557	0.637777	0.637777	0.546667	0.364447	-3.3e-06	0.546667
D3	0.546667	0.546667	0.637777	0.728887	0.546667	0.911117	1.45778	1.64	2.09556
D4	0.09	0.26	0.26	0.96	0.87	0.7	1.56	1.48	1.48
D5	0.273337	0.546667	0.819997	0.819997	0.728887	0.911117	1.64	1.36667	1.45778
D10	0.45	0.37	0.45	0.62	0.79	0.37	0.37	0.62	0.7
D19	1.48	1.3	1.22	2.34	2.17	2.08	3.47	3.3	3.47
