# Supplementary material for: Development of D-box peptides to inhibit the anaphase-promoting complex/cyclosome
Source: eLife. 2025 Sep 1;14:RP104238. doi: 10.7554/eLife.104238 (PMC12401543; doi:10.7554/eLife.104238)
Supplement: Figure 4—source data 1. [file elife-104238-fig4-data1.xlsx]

## Sheet: Figure 4B - delta Tm plots
	Difference in Cdc20 melting temperatures compared to vehicle control with different peptides from technical triplicates
	25 μM			50 μM			100 μM
D7	1.82	1.82	1.82	3.12	2.95	2.86	4.16	4.16	4.08
D12	1.12	1.12	1.12	1.38	1.38	1.38	1.46	2.14	2.3
D20	3.38	3.56	3.56	4.77	4.51	4.6	6.33	6.33	6.33
D21	3.64	3.9	3.9	5.2	5.03	5.03	6.85	6.76	6.42
Apcin	4.42	4.34	4.34	5.98	5.9	5.72	7.29	7.55	7.37

## Sheet: Figure 4C -D20 Fc4-1 sensorgram
	[D20] M
Time (sec)	1.56e-007	3.13e-007	6.25e-007	1.25e-006	2.5e-006	5e-006	1e-005		Note: Data in blue and with an Asterix is excluded in the figure
-56.8	-0.101563	-0.213379	-0.09375	-0.181152	-0.167969	-0.426758	-0.0844727
-56.7	-0.0898438	-0.193848	-0.0742188	-0.161621	-0.246094	-0.395508	-0.213379
-56.6	-0.0585938	-0.193848	-0.0546875	-0.0913086	-0.226563	-0.375977	-0.174316
-56.5	-0.0390625	-0.213379	-0.0546875	-0.0795898	-0.214844	-0.387695	-0.174316
-56.4	-0.0390625	-0.244629	-0.0820313	-0.0600586	-0.214844	-0.375977	-0.154785
-56.3	-0.0195313	-0.23291	-0.0625	-0.0483398	-0.203125	-0.395508	-0.162598
-56.2	-0.0429688	-0.236816	-0.0859375	-0.0639648	-0.226563	-0.407227	-0.174316
-56.1	0	-0.213379	-0.0820313	-0.0288086	-0.203125	-0.383789	-0.162598
-56	0.0195313	-0.193848	-0.0625	-0.0209961	-0.1875	-0.375977	-0.154785
-55.9	0.03125	-0.182129	-0.0546875	-0.0209961	-0.175781	-0.356445	-0.154785
-55.8	0.03125	-0.174316	-0.0429688	-0.00146484	-0.175781	-0.356445	-0.154785
-55.7	0.0454102	-0.183594	-0.0419922	0.00488281	-0.160645	-0.338379	-0.110352
-55.6	0.0771484	-0.187012	0.00292969	-0.0141602	-0.0415039	-0.276855	0.0708008
-55.5	0.0327148	-0.179688	-0.0341797	-0.0419922	-0.0429688	-0.317383	0.0288086
-55.4	-0.00146484	-0.188477	0.00537109	-0.0258789	-0.00927734	-0.30957	-0.00244141
-55.3	0.00390625	-0.165527	0.0141602	-0.0136719	0.0556641	-0.277344	0
-55.2	-0.0141602	-0.163574	0.0195313	-0.0195313	0.0576172	-0.275391	-0.00634766
-55.1	-0.0234375	-0.146973	0.0131836	-0.0195313	0.0351563	-0.279785	-0.0322266
-55	-0.00537109	-0.138184	-0.0078125	-0.00292969	0.0556641	-0.286133	-0.0131836
-54.9	-0.0195313	-0.125977	-0.0195313	-0.0078125	0.0600586	-0.282227	-0.00878906
-54.8	-0.00537109	-0.0913086	0.00878906	0.00878906	0.0664063	-0.248535	0.00927734
-54.7	-0.000976563	-0.0932617	0.0107422	0.0102539	0.0454102	-0.243164	0.0117188
-54.6	-0.00146484	-0.0922852	0.0195313	0.0141602	0.0380859	-0.233887	0.0395508
-54.5	0.0078125	-0.0883789	0.0180664	0.0102539	0.0336914	-0.24707	0.0249023
-54.4	-0.00244141	-0.106445	0.0263672	0.0078125	0.0131836	-0.249512	0.0341797
-54.3	0.00244141	-0.09375	0.0258789	0.015625	0.00634766	-0.235352	0.046875
-54.2	0.0078125	-0.0869141	0.0234375	0.00732422	0.00537109	-0.239258	0.0522461
-54.1	0	-0.0859375	-0.00146484	0.0102539	0.00634766	-0.239258	0.0561523
-54	-0.00244141	-0.0766602	0.00146484	0.0078125	0.015625	-0.239258	0.0537109
-53.9	-0.0170898	-0.0898438	-0.00927734	0.00488281	0.00244141	-0.238281	0.0400391
-53.8	-0.0195313	-0.100098	-0.0102539	0.00390625	-0.00244141	-0.214355	0.0419922
-53.7	-0.00390625	-0.0859375	-0.00292969	0.0112305	-0.00292969	-0.203125	0.046875
-53.6	-0.0234375	-0.0986328	-0.0141602	0.0078125	-0.0283203	-0.19873	0.0458984
-53.5	-0.0102539	-0.100098	-0.0336914	0	-0.0454102	-0.202637	0.0380859
-53.4	-0.00146484	-0.0922852	-0.0341797	0.00878906	-0.0341797	-0.197754	0.0571289
-53.3	-0.000976563	-0.10498	-0.0400391	0.00146484	-0.0361328	-0.205078	0.059082
-53.2	0.00244141	-0.0991211	-0.0483398	0.00488281	-0.0288086	-0.189941	0.0625
-53.1	0.0078125	-0.0922852	-0.0600586	0.0102539	-0.0234375	-0.186035	0.0678711
-53	0.0205078	-0.0922852	-0.0585938	0.0112305	-0.0249023	-0.180664	0.0795898
-52.9	0.0170898	-0.0869141	-0.0625	0.0117188	-0.0258789	-0.187012	0.0849609
-52.8	0.00390625	-0.105469	-0.0805664	-0.0117188	-0.046875	-0.193848	0.0756836
-52.7	-0.0117188	-0.100098	-0.0717773	-0.0209961	-0.046875	-0.187012	0.0742188
-52.6	0.0117188	-0.101563	-0.0507813	0.000976563	-0.0366211	-0.166504	0.0795898
-52.5	-0.000976563	-0.0932617	-0.0610352	-0.0078125	-0.0463867	-0.173828	0.0771484
-52.4	0.00634766	-0.0869141	-0.0454102	-0.00390625	-0.0458984	-0.179199	0.0654297
-52.3	-0.00244141	-0.106934	-0.0522461	-0.0131836	-0.0429688	-0.1875	0.0546875
-52.2	-0.00390625	-0.106445	-0.0546875	-0.0146484	-0.0546875	-0.179199	0.0537109
-52.1	-0.00537109	-0.109375	-0.0546875	-0.0209961	-0.0493164	-0.189941	0.03125
-52	-0.00634766	-0.118164	-0.0546875	-0.0327148	-0.0576172	-0.196289	0.0249023
-51.9	-0.0117188	-0.133789	-0.0415039	-0.015625	-0.0517578	-0.173828	0.0185547
-51.8	-0.00244141	-0.135254	-0.0341797	-0.0107422	-0.0546875	-0.17041	0.00390625
-51.7	-0.0107422	-0.124023	-0.0429688	-0.00927734	-0.0458984	-0.175781	-0.00244141
-51.6	-0.00488281	-0.107422	-0.0244141	-0.00390625	-0.0244141	-0.168457	0.000488281
-51.5	-0.00292969	-0.114746	-0.0224609	-0.00927734	-0.0209961	-0.164063	-0.00146484
-51.4	0	-0.115723	-0.0170898	-0.00292969	-0.0131836	-0.157227	-0.000976563
-51.3	0.0107422	-0.129883	-0.00634766	-0.0117188	-0.0102539	-0.166016	-0.0141602
-51.2	0.0166016	-0.118164	0.00537109	-0.00927734	0.00390625	-0.158691	-0.00244141
-51.1	0.0078125	-0.138184	-0.0170898	-0.0263672	0.00634766	-0.17041	-0.00537109
-51	0.00927734	-0.124512	-0.0141602	-0.0180664	0.0161133	-0.164551	-0.00341797
-50.9	-0.00244141	-0.127441	-0.0258789	-0.0146484	0.0126953	-0.17041	-0.0244141
-50.8	-0.0170898	-0.140625	-0.0366211	-0.0234375	0.00146484	-0.176758	-0.0390625
-50.7	-0.03125	-0.136719	-0.0405273	-0.0317383	-0.0146484	-0.175781	-0.0415039
-50.6	-0.0195313	-0.144043	-0.03125	-0.0195313	-0.0102539	-0.151855	-0.0439453
-50.5	-0.0322266	-0.154785	-0.0517578	-0.0390625	-0.0166016	-0.16748	-0.0532227
-50.4	-0.0405273	-0.157227	-0.0444336	-0.0419922	-0.0288086	-0.180664	-0.0634766
-50.3	-0.0366211	-0.177246	-0.0522461	-0.0522461	-0.0249023	-0.197754	-0.0834961
-50.2	-0.03125	-0.166504	-0.0415039	-0.0429688	-0.015625	-0.185547	-0.0751953
-50.1	-0.0288086	-0.174316	-0.03125	-0.0512695	-0.0117188	-0.1875	-0.0844727
-50	-0.0322266	-0.186035	-0.0351563	-0.0493164	-0.015625	-0.187012	-0.0883789
-49.9	-0.03125	-0.18457	-0.0351563	-0.0522461	-0.0117188	-0.196289	-0.104004
-49.8	-0.00146484	-0.175781	-0.0131836	-0.0380859	0.0273438	-0.176758	-0.0908203
-49.7	-0.00537109	-0.178223	-0.0117188	-0.0444336	0.0351563	-0.180664	-0.0976563
-49.6	-0.000976563	-0.187012	-0.0166016	-0.0532227	0.0444336	-0.185547	-0.0922852
-49.5	-0.00146484	-0.185059	-0.0224609	-0.0732422	0.0610352	-0.1875	-0.0922852
-49.4	0.0078125	-0.194824	-0.0322266	-0.0717773	0.0585938	-0.189453	-0.0908203
-49.3	0.0102539	-0.212402	-0.0458984	-0.0888672	0.0649414	-0.21875	-0.121094
-49.2	0.0219727	-0.231445	-0.0546875	-0.11084	0.0805664	-0.197754	-0.111816
-49.1	0.0288086	-0.210938	-0.0493164	-0.105469	0.0991211	-0.171387	-0.0883789
-49	0.0742188	-0.121094	0	-0.0444336	0.148438	-0.0947266	-0.00634766
-48.9	0.0976563	-0.104004	0.0078125	-0.0170898	0.164063	-0.0375977	0.00390625
-48.8	0.104004	-0.114258	0.0439453	0.0112305	0.166504	0.0195313	0.0170898
-48.7	0.11084	-0.178223	0.0834961	0.0209961	0.185059	0.0668945	0.0224609
-48.6	0.133789	-0.160156	0.106445	-0.0512695	0.174316	0.117188	0.0517578
-48.5	0.0874023	-0.152344	0.168945	-0.0209961	0.169434	0.0717773	0.0820313
-48.4	0.015625	-0.123535	0.161133	0.0141602	0.0625	-0.115723	0.134277
-48.3	0.0419922	-0.10498	-0.0439453	0.0600586	0.11084	-0.0634766	0.0449219
-48.2	-0.0820313	-0.129883	-0.148438	0.0219727	0.0185547	-0.0244141	-0.35498
-48.1	-0.299805	-0.13916	-0.367188	-0.00390625	-0.123535	0.0419922	-0.192871
-48	-0.208008	-0.188477	-0.314941	-0.0976563	-0.10791	-0.0332031	-0.27832
-47.9	-0.0610352	-0.309082	-0.125	-0.270508	0.0966797	-0.208008	-0.0283203
-47.8	-0.0795898	-0.182129	-0.148438	-0.119629	0.00244141	-0.161133	-0.12207
-47.7	-0.0576172	-0.179688	-0.171875	-0.156738	-0.0195313	-0.18457	-0.149902
-47.6	-0.0322266	-0.189941	-0.175781	-0.140625	-0.0258789	-0.223633	-0.165039
-47.5	-0.135254	-0.217285	-0.195313	-0.14209	-0.0405273	-0.254883	-0.18457
-47.4	-0.14209	-0.210938	-0.185059	-0.112305	-0.0429688	-0.221191	-0.171875
-47.3	-0.141602	-0.192383	-0.150879	-0.0888672	-0.0375977	-0.205078	-0.157227
-47.2	-0.145996	-0.197754	-0.155273	-0.0795898	-0.0576172	-0.21875	-0.165527
-47.1	-0.154785	-0.204102	-0.149414	-0.0742188	-0.0805664	-0.218262	-0.161133
-47	-0.149902	-0.182129	-0.128906	-0.0341797	-0.0585938	-0.208008	-0.137695
-46.9	-0.13916	-0.167969	-0.113281	-0.00927734	-0.0429688	-0.165039	-0.101563
-46.8	-0.114746	-0.161133	-0.105469	0.00634766	-0.0415039	-0.15332	-0.0844727
-46.7	-0.101563	-0.164063	-0.0927734	0.0102539	-0.0585938	-0.13916	-0.0717773
-46.6	-0.0952148	-0.146973	-0.0961914	0.0078125	-0.0703125	-0.151855	-0.0673828
-46.5	-0.0483398	-0.103027	-0.0561523	0.0229492	-0.0341797	-0.162598	-0.0288086
-46.4	0.0336914	-0.0258789	0.0283203	0.0883789	0.100098	0.0161133	0.0820313
-46.3	-0.101074	-0.0620117	-0.0605469	-0.0361328	-0.0454102	0.632324	-0.0644531
-46.2	-0.630371	-0.106445	-0.987305	-0.614746	-0.864746	0.402832	-0.927246
-46.1	0.332031	0.147949	-0.692383	-0.515625	-0.577637	-1.06592	-0.620605
-46	0.368652	0.211426	1.26563	1.14209	1.38916	-0.18457	1.34277
-45.9	0.225586	0.0268555	0.256836	0.3125	0.358398	-0.246582	0.376465
-45.8	0.0751953	0.0380859	0.432617	0.260254	0.569336	-0.12207	0.60791
-45.7	-0.10498	-0.27832	-0.0507813	-0.0268555	0.0507813	-0.388672	0.043457
-45.6	0.0219727	-0.150879	-0.134277	-0.0756836	-0.0454102	-0.221191	-0.121094
-45.5	0.0615234	-0.081543	-0.0478516	-0.0429688	-0.0439453	-0.144043	-0.0595703
-45.4	-0.00585938	-0.113281	-0.113281	-0.107422	-0.146484	-0.249023	-0.174805
-45.3	0.000976563	-0.10791	-0.112305	-0.131348	-0.217773	-0.185547	-0.20459
-45.2	0.0371094	-0.124023	-0.102051	-0.0698242	-0.125	-0.0219727	-0.0756836
-45.1	0.0810547	-0.167969	-0.112305	-0.0341797	-0.0244141	0.118652	0.105957
-45	0.11084	-0.213379	-0.105469	-0.0224609	0.0664063	0.124023	0.220215
-44.9	0.135742	-0.195801	-0.10791	0.0327148	0.0966797	0.0512695	0.17627
-44.8	0.0351563	-0.192383	-0.105469	-0.0419922	-0.0170898	0.0146484	0.0771484
-44.7	0.0297852	-0.175781	-0.0537109	0.00732422	-0.00634766	-0.0229492	0.0727539
-44.6	0.0703125	-0.135254	0.03125	0.105469	0.0649414	0.00439453	0.139648
-44.5	0.0639648	-0.135254	0.0546875	0.110352	0.0859375	-0.0322266	0.14209
-44.4	0.0336914	-0.127441	0.100098	0.109375	0.0898438	-0.0517578	0.130371
-44.3	0.0224609	-0.118164	0.118652	0.0961914	0.0693359	-0.0712891	0.102051
-44.2	0.015625	-0.135254	0.0976563	0.0820313	0.0532227	-0.0893555	0.0820313
-44.1	0.015625	-0.119629	0.11084	0.0869141	0.0625	-0.0986328	0.0732422
-44	0.0234375	-0.119629	0.100098	0.0688477	0.0600586	-0.0986328	0.0717773
-43.9	0.0219727	-0.117188	0.0922852	0.0688477	0.0493164	-0.102539	0.0688477
-43.8	0.0131836	-0.0986328	0.0952148	0.0664063	0.0390625	-0.118164	0.0512695
-43.7	0.0141602	-0.119629	0.0859375	0.0571289	0.0234375	-0.110352	0.0327148
-43.6	0.00634766	-0.105469	0.0844727	0.0556641	0.0219727	-0.119629	0.03125
-43.5	-0.00244141	-0.0961914	0.0771484	0.0351563	0.0249023	-0.128418	0.0366211
-43.4	0.0117188	-0.0805664	0.0766602	0.0351563	0.03125	-0.118164	0.0522461
-43.3	0.0297852	-0.0649414	0.0859375	0.0307617	0.0507813	-0.119629	0.0678711
-43.2	0.0366211	-0.0649414	0.0859375	0.0454102	0.0649414	-0.133789	0.0639648
-43.1	0.0258789	-0.0649414	0.0820313	0.0297852	0.0561523	-0.128418	0.0458984
-43	0.0249023	-0.0585938	0.0703125	0.0336914	0.0546875	-0.129883	0.0429688
-42.9	0.0131836	-0.0791016	0.0522461	0.0180664	0.0532227	-0.129883	0.0327148
-42.8	-0.00390625	-0.0883789	0.0415039	0.015625	0.0483398	-0.129883	0.0146484
-42.7	0.00537109	-0.0791016	0.0419922	0.0141602	0.0639648	-0.129883	0.0146484
-42.6	-0.00292969	-0.0898438	0.0166016	0.000976563	0.0556641	-0.145508	0.00390625
-42.5	0.00146484	-0.097168	0.00927734	0.00146484	0.0654297	-0.144043	-0.000976563
-42.4	0.0273438	-0.078125	0.0234375	0.015625	0.0664063	-0.12207	0.0170898
-42.3	0.0170898	-0.0986328	0.00390625	-0.00537109	0.0703125	-0.10791	0.0170898
-42.2	0.0141602	-0.101563	-0.00634766	-0.0146484	0.0625	-0.108887	0.0234375
-42.1	0.00634766	-0.0952148	-0.0146484	-0.0107422	0.0532227	-0.121094	0.015625
-42	0	-0.0830078	-0.0078125	0.00244141	0.0610352	-0.12207	0.0185547
-41.9	-0.00244141	-0.0922852	-0.0102539	0.00244141	0.0678711	-0.12207	-0.00244141
-41.8	-0.00244141	-0.097168	-0.0234375	-0.00146484	0.0639648	-0.126953	-0.00488281
-41.7	-0.0170898	-0.119629	-0.0234375	-0.00927734	0.0546875	-0.137695	-0.0102539
-41.6	-0.0234375	-0.109375	-0.0258789	-0.0117188	0.0507813	-0.137695	-0.0258789
-41.5	-0.0258789	-0.118164	-0.0454102	-0.0234375	0.0327148	-0.141602	-0.0283203
-41.4	-0.0405273	-0.144531	-0.0600586	-0.0380859	0.0180664	-0.162598	-0.0522461
-41.3	-0.0336914	-0.137695	-0.0649414	-0.03125	0.0327148	-0.169922	-0.0541992
-41.2	-0.0429688	-0.146973	-0.0756836	-0.0522461	0.0234375	-0.188477	-0.0727539
-41.1	-0.0351563	-0.13916	-0.0742188	-0.046875	0.0219727	-0.178223	-0.0649414
-41	-0.0327148	-0.136719	-0.0834961	-0.0512695	0.0180664	-0.166504	-0.0625
-40.9	-0.0244141	-0.129883	-0.0766602	-0.0351563	0.0249023	-0.158203	-0.0556641
-40.8	-0.0146484	-0.128906	-0.0834961	-0.0341797	0.0258789	-0.158691	-0.0546875
-40.7	-0.00927734	-0.135254	-0.0898438	-0.0405273	0.0209961	-0.165039	-0.0585938
-40.6	0	-0.133789	-0.100098	-0.0405273	0.0297852	-0.165039	-0.0493164
-40.5	-0.0078125	-0.125	-0.101563	-0.0405273	0.0405273	-0.157227	-0.0493164
-40.4	0	-0.115723	-0.101563	-0.0405273	0.046875	-0.157227	-0.0493164
-40.3	-0.0141602	-0.129883	-0.115723	-0.0546875	0.0405273	-0.179199	-0.0634766
-40.2	-0.0234375	-0.136719	-0.125	-0.0639648	0.0234375	-0.180664	-0.0751953
-40.1	-0.0351563	-0.136719	-0.126465	-0.0678711	0.0219727	-0.183594	-0.0859375
-40	-0.0415039	-0.125977	-0.115723	-0.0742188	0.0249023	-0.194824	-0.0830078
-39.9	-0.0483398	-0.135254	-0.132813	-0.0834961	0.015625	-0.206543	-0.0844727
-39.8	-0.0507813	-0.149414	-0.136719	-0.0966797	0.0102539	-0.219727	-0.0961914
-39.7	-0.0625	-0.158691	-0.138184	-0.103027	0.00390625	-0.221191	-0.0961914
-39.6	-0.0625	-0.158691	-0.132813	-0.105469	0.00390625	-0.227539	-0.0986328
-39.5	-0.0625	-0.146973	-0.132813	-0.114746	0.00390625	-0.22998	-0.10791
-39.4	-0.0649414	-0.146973	-0.132813	-0.122559	0.00146484	-0.239258	-0.109375
-39.3	-0.0742188	-0.149414	-0.135254	-0.124023	-0.0078125	-0.239258	-0.115723
-39.2	-0.0703125	-0.146973	-0.144531	-0.118652	0.00390625	-0.227539	-0.104004
-39.1	-0.0820313	-0.160156	-0.144531	-0.118652	0.00390625	-0.227539	-0.104004
-39	-0.0742188	-0.157227	-0.134277	-0.11084	0.0117188	-0.225098	-0.0961914
-38.9	-0.0766602	-0.158691	-0.132813	-0.11084	0.0117188	-0.214355	-0.102539
-38.8	-0.0976563	-0.158691	-0.132813	-0.11084	0.00390625	-0.208008	-0.09375
-38.7	-0.09375	-0.144531	-0.131348	-0.0976563	0.015625	-0.196289	-0.0727539
-38.6	-0.0927734	-0.136719	-0.126465	-0.0942383	0.0141602	-0.209473	-0.0742188
-38.5	-0.0922852	-0.145508	-0.135254	-0.10791	-0.0078125	-0.219727	-0.0830078
-38.4	-0.113281	-0.154785	-0.166504	-0.125	-0.0258789	-0.240234	-0.0947266
-38.3	-0.121094	-0.166504	-0.177246	-0.135742	-0.0483398	-0.260254	-0.117188
-38.2	-0.11084	-0.154785	-0.179688	-0.12793	-0.0415039	-0.262695	-0.111816
-38.1	-0.115723	-0.15332	-0.175781	-0.119629	-0.0415039	-0.26123	-0.110352
-38	-0.101563	-0.145996	-0.149902	-0.112305	-0.0249023	-0.244629	-0.0961914
-37.9	-0.104004	-0.145508	-0.143066	-0.104492	-0.0288086	-0.235352	-0.104004
-37.8	-0.124023	-0.154785	-0.149902	-0.11084	-0.0351563	-0.23291	-0.101563
-37.7	-0.123535	-0.154785	-0.143066	-0.109375	-0.0375977	-0.233887	-0.104004
-37.6	-0.132813	-0.166504	-0.166504	-0.106934	-0.046875	-0.22998	-0.106445
-37.5	-0.128906	-0.162598	-0.171875	-0.120117	-0.046875	-0.236816	-0.113281
-37.4	-0.113281	-0.146973	-0.157715	-0.113281	-0.0571289	-0.227539	-0.106445
-37.3	-0.113281	-0.149414	-0.164063	-0.122559	-0.0664063	-0.227539	-0.115723
-37.2	-0.113281	-0.158691	-0.175781	-0.122559	-0.0664063	-0.227539	-0.115723
-37.1	-0.113281	-0.15625	-0.175781	-0.122559	-0.0664063	-0.227539	-0.115723
-37	-0.113281	-0.146973	-0.175781	-0.122559	-0.0585938	-0.227539	-0.115723
-36.9	-0.115723	-0.145508	-0.175781	-0.122559	-0.0585938	-0.227539	-0.113281
-36.8	-0.125	-0.13916	-0.164063	-0.122559	-0.0664063	-0.227539	-0.104004
-36.7	-0.122559	-0.136719	-0.162598	-0.120117	-0.0561523	-0.227539	-0.104004
-36.6	-0.111816	-0.135254	-0.15625	-0.11084	-0.0546875	-0.227539	-0.102539
-36.5	-0.11084	-0.143066	-0.164063	-0.118652	-0.0610352	-0.235352	-0.101563
-36.4	-0.101563	-0.135254	-0.164063	-0.118652	-0.046875	-0.235352	-0.0791016
-36.3	-0.11084	-0.144531	-0.161621	-0.130371	-0.0654297	-0.24707	-0.0795898
-36.2	-0.101563	-0.13916	-0.153809	-0.130371	-0.0546875	-0.248535	-0.0610352
-36.1	-0.102539	-0.15332	-0.158691	-0.128906	-0.0634766	-0.253418	-0.0634766
-36	-0.106934	-0.146973	-0.152344	-0.122559	-0.0664063	-0.235352	-0.0751953
-35.9	-0.0991211	-0.135254	-0.140625	-0.108398	-0.0537109	-0.219727	-0.0703125
-35.8	-0.0922852	-0.136719	-0.14209	-0.101563	-0.0429688	-0.205566	-0.0610352
-35.7	-0.101563	-0.13916	-0.144531	-0.106934	-0.0415039	-0.202637	-0.0507813
-35.6	-0.0952148	-0.115723	-0.113281	-0.0825195	-0.0249023	-0.1875	-0.03125
-35.5	-0.110352	-0.125977	-0.121094	-0.0883789	-0.0258789	-0.193359	-0.0307617
-35.4	-0.112305	-0.123535	-0.121094	-0.090332	-0.0351563	-0.193848	-0.03125
-35.3	-0.0961914	-0.12207	-0.110352	-0.0883789	-0.0351563	-0.18457	-0.0205078
-35.2	-0.0922852	-0.117188	-0.114746	-0.0913086	-0.0375977	-0.183105	-0.015625
-35.1	-0.101563	-0.12207	-0.121094	-0.0913086	-0.046875	-0.176758	-0.0219727
-35	-0.0991211	-0.113281	-0.113281	-0.0913086	-0.0546875	-0.176758	-0.0219727
-34.9	-0.0898438	-0.105469	-0.11084	-0.090332	-0.0561523	-0.178223	-0.0234375
-34.8	-0.0898438	-0.111816	-0.109375	-0.0874023	-0.0600586	-0.18457	-0.0297852
-34.7	-0.0795898	-0.111816	-0.101563	-0.0859375	-0.0507813	-0.18457	-0.0283203
-34.6	-0.0703125	-0.111816	-0.109375	-0.0795898	-0.0493164	-0.182129	-0.0219727
-34.5	-0.0571289	-0.110352	-0.100098	-0.078125	-0.0415039	-0.169922	-0.0205078
-34.4	-0.0625	-0.104004	-0.09375	-0.0717773	-0.0351563	-0.154785	-0.0141602
-34.3	-0.0507813	-0.104004	-0.09375	-0.0717773	-0.0351563	-0.145508	-0.015625
-34.2	-0.0522461	-0.105469	-0.0952148	-0.0732422	-0.0380859	-0.146973	-0.0234375
-34.1	-0.0546875	-0.110352	-0.100098	-0.0756836	-0.0478516	-0.159668	-0.0283203
-34	-0.0375977	-0.104004	-0.09375	-0.0600586	-0.0351563	-0.15332	-0.0219727
-33.9	-0.0288086	-0.101563	-0.0913086	-0.0561523	-0.0327148	-0.150879	-0.0180664
-33.8	-0.0209961	-0.0922852	-0.0820313	-0.0498047	-0.0351563	-0.144043	0
-33.7	-0.0205078	-0.0908203	-0.0805664	-0.0546875	-0.0336914	-0.151855	0.012207
-33.6	-0.0234375	-0.0844727	-0.0766602	-0.0600586	-0.0288086	-0.143066	0.0273438
-33.5	-0.0234375	-0.0869141	-0.0859375	-0.0600586	-0.0351563	-0.133789	0.0380859
-33.4	-0.015625	-0.0952148	-0.0874023	-0.0498047	-0.0351563	-0.135254	0.0454102
-33.3	-0.0429688	-0.0961914	-0.105469	-0.0678711	-0.046875	-0.15332	0.0390625
-33.2	-0.0336914	-0.0986328	-0.10791	-0.0703125	-0.0493164	-0.154297	0.0473633
-33.1	-0.0405273	-0.115723	-0.114746	-0.0898438	-0.0561523	-0.154785	0.0444336
-33	-0.0195313	-0.104004	-0.09375	-0.0576172	-0.0351563	-0.133789	0.0600586
-32.9	-0.0170898	-0.104004	-0.0795898	-0.0600586	-0.0327148	-0.133789	0.0756836
-32.8	-0.00634766	-0.104004	-0.0688477	-0.0576172	-0.0234375	-0.133789	0.0874023
-32.7	-0.00146484	-0.105469	-0.0639648	-0.0498047	-0.0234375	-0.131348	0.0742188
-32.6	-0.0078125	-0.111816	-0.0625	-0.0546875	-0.0209961	-0.114258	0.0678711
-32.5	-0.0078125	-0.106445	-0.0649414	-0.0483398	-0.0126953	-0.124512	0.0639648
-32.4	0	-0.113281	-0.0717773	-0.046875	-0.015625	-0.133789	0.0458984
-32.3	-0.00927734	-0.105469	-0.0639648	-0.0419922	-0.0170898	-0.135254	0.0375977
-32.2	-0.00634766	-0.097168	-0.0688477	-0.0444336	-0.0102539	-0.142578	0.0419922
-32.1	-0.0102539	-0.0961914	-0.0742188	-0.0405273	-0.0273438	-0.158691	0.0341797
-32	-0.00390625	-0.0961914	-0.0727539	-0.0405273	-0.0273438	-0.175293	0.0273438
-31.9	-0.00390625	-0.0898438	-0.0664063	-0.0522461	-0.015625	-0.168945	0.0380859
-31.8	-0.00537109	-0.0947266	-0.0664063	-0.0405273	-0.015625	-0.168945	0.0444336
-31.7	0	-0.0766602	-0.0444336	-0.0429688	-0.00390625	-0.154785	0.0585938
-31.6	-0.00146484	-0.0664063	-0.0522461	-0.0537109	-0.00537109	-0.146973	0.0678711
-31.5	-0.0102539	-0.0703125	-0.0585938	-0.0600586	-0.00927734	-0.150879	0.0703125
-31.4	-0.0195313	-0.0634766	-0.0610352	-0.0625	-0.00244141	-0.142578	0.0693359
-31.3	-0.0117188	-0.0634766	-0.0625	-0.0615234	-0.00244141	-0.137695	0.0693359
-31.2	0.00146484	-0.0571289	-0.0610352	-0.0522461	0.00390625	-0.137695	0.078125
-31.1	0.00634766	-0.0561523	-0.0483398	-0.0600586	0.00244141	-0.13916	0.0859375
-31	-0.0117188	-0.0532227	-0.0546875	-0.0600586	-0.00146484	-0.145508	0.0820313
-30.9	-0.00244141	-0.0439453	-0.0429688	-0.0429688	0.0170898	-0.133789	0.100586
-30.8	-0.00927734	-0.0507813	-0.0405273	-0.0498047	0.0102539	-0.131348	0.0913086
-30.7	-0.00244141	-0.0439453	-0.0336914	-0.0405273	0.0170898	-0.124512	0.0864258
-30.6	-0.00146484	-0.0454102	-0.0351563	-0.0405273	0.015625	-0.133789	0.0756836
-30.5	0.00537109	-0.050293	-0.0454102	-0.0415039	0.0107422	-0.134766	0.0600586
-30.4	-0.00390625	-0.0664063	-0.046875	-0.0444336	-0.0078125	-0.137695	0.0444336
-30.3	-0.00390625	-0.0571289	-0.0546875	-0.0419922	-0.0078125	-0.135254	0.0444336
-30.2	0.00146484	-0.0454102	-0.0429688	-0.0351563	-0.0078125	-0.125977	0.0561523
-30.1	0.0078125	-0.0454102	-0.0351563	-0.0444336	-0.0078125	-0.125977	0.0561523
-30	0.00390625	-0.0556641	-0.0546875	-0.0561523	-0.0195313	-0.137695	0.0444336
-29.9	0.0180664	-0.0375977	-0.0429688	-0.0522461	-0.00537109	-0.125977	0.0483398
-29.8	0.0273438	-0.0390625	-0.0429688	-0.0537109	0.00390625	-0.128418	0.0561523
-29.7	0.0273438	-0.0454102	-0.0429688	-0.0585938	0.00390625	-0.149414	0.0483398
-29.6	0.0170898	-0.0571289	-0.0429688	-0.0522461	0.00390625	-0.149414	0.0341797
-29.5	0.0078125	-0.0571289	-0.0546875	-0.0522461	0.00390625	-0.157227	0.0249023
-29.4	0.00878906	-0.0571289	-0.0405273	-0.0498047	0.00634766	-0.154785	0.0258789
-29.3	0	-0.0571289	-0.03125	-0.0405273	0.015625	-0.145508	0.0288086
-29.2	0.0117188	-0.0571289	-0.0336914	-0.0537109	0.0078125	-0.145508	0.0288086
-29.1	0.0117188	-0.0571289	-0.0546875	-0.0600586	0.0078125	-0.146973	0.0146484
-29	0	-0.0571289	-0.0546875	-0.0600586	0.0078125	-0.15332	0.00537109
-28.9	-0.00244141	-0.0585938	-0.0561523	-0.0600586	0.0078125	-0.155762	0.00390625
-28.8	-0.0117188	-0.0649414	-0.0625	-0.0600586	0.00537109	-0.176758	-0.0126953
-28.7	-0.00390625	-0.0571289	-0.0546875	-0.0522461	0.00390625	-0.168945	-0.0141602
-28.6	-0.0117188	-0.0649414	-0.0703125	-0.0678711	-0.0170898	-0.165039	-0.0219727
-28.5	-0.00927734	-0.0625	-0.0678711	-0.0600586	-0.0209961	-0.162598	-0.0209961
-28.4	0	-0.0556641	-0.0585938	-0.0678711	-0.0141602	-0.154785	-0.0180664
-28.3	-0.00244141	-0.0556641	-0.0493164	-0.0585938	-0.0141602	-0.151855	-0.0229492
-28.2	0.00244141	-0.0493164	-0.0429688	-0.0537109	-0.0078125	-0.157227	-0.0258789
-28.1	-0.00244141	-0.0493164	-0.0429688	-0.0600586	-0.0078125	-0.159668	-0.0258789
-28	0.00244141	-0.0507813	-0.0429688	-0.0600586	-0.0078125	-0.157227	-0.0258789
-27.9	0.0078125	-0.0571289	-0.0454102	-0.0600586	-0.015625	-0.157227	-0.0258789
-27.8	-0.00146484	-0.0546875	-0.0522461	-0.0600586	-0.0146484	-0.157227	-0.0258789
-27.7	0.00537109	-0.0478516	-0.0546875	-0.0600586	-0.0117188	-0.157227	-0.0258789
-27.6	-0.00390625	-0.0571289	-0.0429688	-0.0522461	-0.0141602	-0.158691	-0.0273438
-27.5	-0.00244141	-0.0556641	-0.0415039	-0.0522461	-0.0219727	-0.163574	-0.0322266
-27.4	0.00244141	-0.0493164	-0.0351563	-0.0522461	-0.0273438	-0.157227	-0.0283203
-27.3	-0.00390625	-0.046875	-0.0327148	-0.0576172	-0.0263672	-0.157227	-0.0366211
-27.2	-0.00390625	-0.0375977	-0.0366211	-0.0507813	-0.0258789	-0.157227	-0.0336914
-27.1	-0.00244141	-0.0268555	-0.0439453	-0.0585938	-0.0336914	-0.155762	-0.034668
-27	-0.00390625	-0.0390625	-0.0546875	-0.0615234	-0.0351563	-0.158691	-0.0454102
-26.9	-0.00390625	-0.0546875	-0.0522461	-0.0654297	-0.0366211	-0.162598	-0.0444336
-26.8	0.00244141	-0.0400391	-0.0351563	-0.0507813	-0.0351563	-0.145508	-0.0361328
-26.7	-0.00390625	-0.0390625	-0.0429688	-0.0600586	-0.0351563	-0.147949	-0.046875
-26.6	-0.0126953	-0.0439453	-0.0439453	-0.0585938	-0.0361328	-0.16748	-0.0541992
-26.5	-0.0146484	-0.0493164	-0.0444336	-0.0522461	-0.0366211	-0.160156	-0.0546875
-26.4	-0.0117188	-0.0507813	-0.0366211	-0.0522461	-0.0288086	-0.159668	-0.0478516
-26.3	-0.0117188	-0.0571289	-0.0429688	-0.0639648	-0.0351563	-0.168945	-0.046875
-26.2	-0.0117188	-0.0649414	-0.0405273	-0.0629883	-0.0327148	-0.166504	-0.0532227
-26.1	-0.0131836	-0.0664063	-0.03125	-0.0483398	-0.0258789	-0.161133	-0.0532227
-26	-0.0195313	-0.0751953	-0.0429688	-0.0507813	-0.0351563	-0.176758	-0.0546875
-25.9	-0.0205078	-0.0830078	-0.0415039	-0.0585938	-0.0336914	-0.179199	-0.0595703
-25.8	-0.0327148	-0.0869141	-0.0429688	-0.0615234	-0.0351563	-0.196289	-0.0610352
-25.7	-0.0390625	-0.106934	-0.0429688	-0.0771484	-0.0341797	-0.197754	-0.0610352
-25.6	-0.0400391	-0.102539	-0.0429688	-0.0688477	-0.0297852	-0.205078	-0.0595703
-25.5	-0.0444336	-0.0986328	-0.0429688	-0.0732422	-0.0258789	-0.208008	-0.0546875
-25.4	-0.0483398	-0.106934	-0.0429688	-0.0795898	-0.0351563	-0.205566	-0.0610352
-25.3	-0.0415039	-0.106445	-0.0507813	-0.0795898	-0.0351563	-0.197754	-0.0532227
-25.2	-0.0429688	-0.114258	-0.0507813	-0.0795898	-0.0351563	-0.20752	-0.0620117
-25.1	-0.0429688	-0.106934	-0.0483398	-0.0771484	-0.0351563	-0.226563	-0.0639648
-25	-0.0444336	-0.106445	-0.0415039	-0.0703125	-0.0366211	-0.226074	-0.0634766
-24.9	-0.0493164	-0.114258	-0.0493164	-0.0883789	-0.0415039	-0.235352	-0.0727539
-24.8	-0.03125	-0.106934	-0.0341797	-0.0888672	-0.0351563	-0.235352	-0.0727539
-24.7	-0.03125	-0.104004	-0.0390625	-0.0786133	-0.0341797	-0.234375	-0.0703125
-24.6	-0.03125	-0.10498	-0.0375977	-0.0766602	-0.0322266	-0.22998	-0.0595703
-24.5	-0.0336914	-0.10791	-0.0336914	-0.0732422	-0.0351563	-0.218262	-0.0546875
-24.4	-0.0522461	-0.117188	-0.0522461	-0.0898438	-0.0585938	-0.236816	-0.0712891
-24.3	-0.0429688	-0.118164	-0.0429688	-0.0849609	-0.046875	-0.22998	-0.0766602
-24.2	-0.0429688	-0.117188	-0.0429688	-0.0888672	-0.046875	-0.236816	-0.0756836
-24.1	-0.0429688	-0.109375	-0.0429688	-0.0820313	-0.0483398	-0.22998	-0.0751953
-24	-0.0429688	-0.114258	-0.0429688	-0.0898438	-0.0556641	-0.239258	-0.0830078
-23.9	-0.0429688	-0.10791	-0.0405273	-0.0834961	-0.0576172	-0.229004	-0.078125
-23.8	-0.0444336	-0.10791	-0.0336914	-0.0732422	-0.0571289	-0.235352	-0.0844727
-23.7	-0.0507813	-0.114746	-0.0405273	-0.0771484	-0.0639648	-0.235352	-0.0820313
-23.6	-0.0493164	-0.10498	-0.03125	-0.0688477	-0.0546875	-0.235352	-0.0737305
-23.5	-0.046875	-0.110352	-0.03125	-0.0717773	-0.0454102	-0.235352	-0.0766602
-23.4	-0.0600586	-0.118652	-0.0234375	-0.0708008	-0.0537109	-0.235352	-0.0756836
-23.3	-0.0517578	-0.12207	-0.03125	-0.0805664	-0.0517578	-0.235352	-0.0712891
-23.2	-0.0537109	-0.115723	-0.0288086	-0.0708008	-0.046875	-0.22998	-0.0649414
-23.1	-0.0493164	-0.115723	-0.0205078	-0.0585938	-0.046875	-0.24707	-0.0649414
-23	-0.03125	-0.113281	-0.0209961	-0.0498047	-0.0444336	-0.244629	-0.0649414
-22.9	-0.0351563	-0.106445	-0.0141602	-0.0429688	-0.0258789	-0.22998	-0.0649414
-22.8	-0.0493164	-0.114258	-0.0234375	-0.0507813	-0.046875	-0.239258	-0.0649414
-22.7	-0.0419922	-0.106934	-0.0234375	-0.043457	-0.0351563	-0.244629	-0.0649414
-22.6	-0.0390625	-0.104004	-0.0327148	-0.0405273	-0.0444336	-0.235352	-0.0649414
-22.5	-0.0283203	-0.102539	-0.0117188	-0.0273438	-0.0234375	-0.223633	-0.0532227
-22.4	-0.0419922	-0.0976563	-0.00927734	-0.0209961	-0.0234375	-0.223633	-0.0532227
-22.3	-0.0283203	-0.10498	-0.000976563	-0.0209961	-0.0219727	-0.224609	-0.0532227
-22.2	-0.0302734	-0.106934	-0.00537109	-0.0209961	-0.015625	-0.238281	-0.0507813
-22.1	-0.0297852	-0.104004	-0.0141602	-0.0224609	-0.0170898	-0.237793	-0.0415039
-22	-0.0351563	-0.110352	-0.0209961	-0.0249023	-0.0219727	-0.244629	-0.0400391
-21.9	-0.0195313	-0.104004	-0.0126953	-0.0102539	-0.0180664	-0.233887	-0.0400391
-21.8	-0.0195313	-0.104004	-0.0263672	-0.0146484	-0.0249023	-0.227539	-0.0327148
-21.7	-0.03125	-0.101563	-0.0209961	-0.0263672	-0.0170898	-0.234375	-0.0297852
-21.6	-0.03125	-0.0922852	-0.0126953	-0.0170898	-0.0234375	-0.232422	-0.0400391
-21.5	-0.0273438	-0.102539	-0.015625	-0.0180664	-0.0219727	-0.23291	-0.0322266
-21.4	-0.0117188	-0.09375	-0.0131836	-0.0200195	-0.015625	-0.235352	-0.0249023
-21.3	-0.0117188	-0.0844727	-0.00634766	-0.0195313	-0.015625	-0.233887	-0.0229492
-21.2	-0.0117188	-0.0820313	-0.0209961	-0.0263672	-0.015625	-0.225098	-0.0234375
-21.1	-0.0117188	-0.0751953	-0.0141602	-0.0195313	-0.0170898	-0.218262	-0.015625
-21	-0.0209961	-0.0844727	-0.0224609	-0.027832	-0.0209961	-0.226563	-0.0195313
-20.9	-0.0117188	-0.0844727	-0.0180664	-0.0375977	-0.0126953	-0.222168	-0.0112305
-20.8	0.00146484	-0.0883789	-0.0102539	-0.0273438	-0.0117188	-0.21582	-0.0117188
-20.7	0.0078125	-0.0844727	-0.00390625	-0.0224609	0.0141602	-0.21582	-0.0126953
-20.6	0.00878906	-0.0820313	-0.00292969	-0.0405273	0.0078125	-0.204102	-0.0195313
-20.5	0.0107422	-0.0751953	-0.0126953	-0.0405273	0.00927734	-0.214355	-0.0102539
-20.4	-0.00390625	-0.0820313	-0.0131836	-0.0380859	0.00488281	-0.207031	-0.0219727
-20.3	-0.00390625	-0.0737305	-0.00390625	-0.0180664	0.00683594	-0.205078	-0.0229492
-20.2	-0.00146484	-0.0664063	0.00390625	-0.0107422	0.0141602	-0.1875	-0.015625
-20.1	0.0102539	-0.0546875	0.00634766	0.000976563	0.0234375	-0.182129	-0.00390625
-20	0.0209961	-0.0454102	0.0078125	0.0102539	0.0366211	-0.171387	0.00683594
-19.9	0.03125	-0.0415039	0.00927734	0	0.0336914	-0.161133	0.0170898
-19.8	0.046875	-0.0141602	0.0273438	0.0166016	0.0522461	-0.133789	0.0327148
-19.7	0.0493164	-0.0117188	0.0297852	0.0219727	0.0439453	-0.133789	0.0273438
-19.6	0.0585938	-0.0141602	0.0390625	0.0195313	0.0390625	-0.133789	0.0351563
-19.5	0.0522461	-0.0126953	0.0405273	0.0180664	0.0380859	-0.132324	0.027832
-19.4	0.0585938	-0.00634766	0.046875	0.0102539	0.0234375	-0.125977	0.0249023
-19.3	0.0610352	-0.0141602	0.0493164	0.0102539	0.0258789	-0.123535	0.0180664
-19.2	0.0678711	-0.0166016	0.0537109	0.0078125	0.0327148	-0.116699	0.0341797
-19.1	0.0585938	-0.0258789	0.0351563	0.00634766	0.0234375	-0.125977	0.0170898
-19	0.046875	-0.0258789	0.0234375	0.00488281	0.0117188	-0.137695	0.0170898
-18.9	0.046875	-0.0400391	0.0234375	-0.00146484	0.0141602	-0.137695	0.0170898
-18.8	0.046875	-0.0493164	0.0234375	-0.00927734	0.0170898	-0.137695	0.0146484
-18.7	0.0375977	-0.0600586	0.0219727	-0.00537109	0.0219727	-0.146973	0.00390625
-18.6	0.0170898	-0.0727539	0.0078125	-0.0302734	0.015625	-0.155762	-0.00244141
-18.5	0.0078125	-0.0751953	0.00634766	-0.0351563	0.015625	-0.176758	0.00390625
-18.4	0.0141602	-0.078125	-0.00390625	-0.0209961	0.0219727	-0.168945	0.00292969
-18.3	0.0078125	-0.0961914	-0.00390625	-0.0209961	0.00390625	-0.17041	-0.00634766
-18.2	0.0234375	-0.0830078	0.0117188	-0.00537109	0.0195313	-0.163574	0.00927734
-18.1	0.0366211	-0.078125	0.0273438	0.0102539	0.0351563	-0.168945	0.0249023
-18	0.03125	-0.0830078	0.0263672	0.0195313	0.0366211	-0.16748	0.0263672
-17.9	0.0375977	-0.0844727	0.0126953	0.0166016	0.0336914	-0.175781	0.0258789
-17.8	0.0483398	-0.0688477	0.0170898	0.0258789	0.0429688	-0.157227	0.0419922
-17.7	0.0546875	-0.0688477	0.0234375	0.0283203	0.0366211	-0.157227	0.0327148
-17.6	0.0444336	-0.0712891	0.0234375	0.0390625	0.0429688	-0.158203	0.0327148
-17.5	0.0478516	-0.078125	0.0454102	0.0571289	0.0532227	-0.148438	0.0429688
-17.4	0.0522461	-0.0859375	0.0405273	0.0595703	0.0483398	-0.143066	0.0380859
-17.3	0.0571289	-0.0947266	0.0375977	0.0688477	0.0546875	-0.133789	0.0444336
-17.2	0.0458984	-0.10791	0.0444336	0.0639648	0.0405273	-0.13623	0.0405273
-17.1	0.0258789	-0.125977	0.046875	0.0439453	0.0336914	-0.147949	0.0224609
-17	0.0195313	-0.144531	0.0375977	0.0297852	0.0454102	-0.154785	0.0141602
-16.9	0.0219727	-0.133789	0.046875	0.0297852	0.046875	-0.145508	0.0170898
-16.8	0.0405273	-0.119629	0.0585938	0.0400391	0.0561523	-0.133789	0.0263672
-16.7	0.0322266	-0.136719	0.0585938	0.0322266	0.0478516	-0.135254	0.0170898
-16.6	0.0249023	-0.154785	0.0585938	0.0249023	0.0498047	-0.142578	0.0146484
-16.5	0.03125	-0.164063	0.046875	0.0102539	0.0439453	-0.154785	-0.00537109
-16.4	0.0302734	-0.155762	0.046875	-0.00390625	0.043457	-0.147949	-0.000976563
-16.3	0.0141602	-0.158691	0.0444336	-0.0146484	0.03125	-0.161133	-0.000976563
-16.2	0.00634766	-0.160156	0.0351563	-0.0249023	0.0322266	-0.178223	-0.0273438
-16.1	0	-0.165039	0.0375977	-0.0405273	0.0351563	-0.175293	-0.0219727
-16	-0.000976563	-0.15625	0.0444336	-0.0405273	0.0249023	-0.17041	-0.0219727
-15.9	0.00634766	-0.150879	0.0336914	-0.0419922	0.0141602	-0.180664	-0.0258789
-15.8	-0.00244141	-0.166504	0.0249023	-0.0507813	0.00537109	-0.19873	-0.0439453
-15.7	-0.0107422	-0.168945	0.00244141	-0.0507813	-0.00537109	-0.208008	-0.046875
-15.6	-0.00634766	-0.176758	-0.0102539	-0.0585938	-0.00244141	-0.206543	-0.0517578
-15.5	-0.00244141	-0.169434	-0.0078125	-0.0537109	0	-0.20166	-0.046875
-15.4	-0.0117188	-0.165039	-0.0234375	-0.0600586	-0.0234375	-0.208008	-0.0541992
-15.3	-0.0117188	-0.158691	-0.0234375	-0.0600586	-0.0234375	-0.208008	-0.0585938
-15.2	-0.0234375	-0.15625	-0.0234375	-0.0600586	-0.0234375	-0.208008	-0.0649414
-15.1	0	-0.133789	-0.0180664	-0.0483398	-0.0102539	-0.197266	-0.0424805
-15	0.000976563	-0.125	-0.0107422	-0.0458984	-0.00292969	-0.199219	-0.0419922
-14.9	0.00146484	-0.123535	-0.0102539	-0.0415039	-0.00244141	-0.196289	-0.0322266
-14.8	-0.00634766	-0.12207	-0.0195313	-0.0600586	-0.0117188	-0.194824	-0.0415039
-14.7	0.0078125	-0.105469	-0.0195313	-0.0717773	-0.0102539	-0.188477	-0.0400391
-14.6	0.0102539	-0.09375	-0.0170898	-0.0683594	-0.00292969	-0.183594	-0.0302734
-14.5	0.00927734	-0.102539	-0.0219727	-0.0688477	-0.0102539	-0.179199	-0.0283203
-14.4	0.0180664	-0.0922852	-0.0273438	-0.0678711	-0.00390625	-0.18457	-0.0205078
-14.3	0.0483398	-0.0585938	-0.00244141	-0.0419922	0.0131836	-0.161133	0
-14.2	0.0390625	-0.0649414	-0.0117188	-0.0561523	0.00244141	-0.176758	0.00683594
-14.1	0.0400391	-0.0625	-0.00927734	-0.0537109	-0.0117188	-0.176758	0.0117188
-14	0.0341797	-0.0698242	-0.0234375	-0.0585938	-0.0258789	-0.190918	0.00439453
-13.9	0.0180664	-0.0874023	-0.0234375	-0.0678711	-0.0263672	-0.197754	-0.0117188
-13.8	0.0273438	-0.0830078	-0.0219727	-0.0664063	-0.0219727	-0.188477	0.00537109
-13.7	0.0273438	-0.0766602	-0.0170898	-0.0717773	-0.015625	-0.188477	0.00292969
-13.6	0.0507813	-0.0649414	-0.00927734	-0.0576172	-0.00146484	-0.165039	0.00634766
-13.5	0.0390625	-0.0766602	0	-0.0576172	-0.00390625	-0.176758	-0.000976563
-13.4	0.0351563	-0.0791016	-0.0141602	-0.0507813	-0.00634766	-0.179199	0.00146484
-13.3	0.0195313	-0.0883789	-0.0141602	-0.0600586	-0.015625	-0.188477	-0.00244141
-13.2	0.0249023	-0.0883789	-0.0234375	-0.0717773	-0.015625	-0.188477	-0.00244141
-13.1	0.0180664	-0.0859375	-0.0302734	-0.0678711	-0.0117188	-0.186035	0.0078125
-13	0.0273438	-0.0766602	-0.0117188	-0.0405273	0.00244141	-0.176758	0.0170898
-12.9	0.0273438	-0.0766602	-0.0117188	-0.0498047	0.0078125	-0.176758	0.0170898
-12.8	0.0249023	-0.0883789	-0.0234375	-0.0522461	-0.00390625	-0.176758	0.0185547
-12.7	0.015625	-0.0883789	-0.0234375	-0.0522461	-0.00390625	-0.176758	0.0131836
-12.6	0.0219727	-0.0883789	-0.0234375	-0.0522461	-0.00390625	-0.176758	0.0117188
-12.5	0.015625	-0.0766602	-0.0258789	-0.0507813	-0.00390625	-0.168945	0.00537109
-12.4	0.0209961	-0.0922852	-0.0415039	-0.0507813	-0.0102539	-0.175293	0.000488281
-12.3	0.0273438	-0.0766602	-0.0351563	-0.0522461	-0.00390625	-0.168945	0.0131836
-12.2	0.0273438	-0.0766602	-0.0351563	-0.0522461	-0.00390625	-0.168945	0.0131836
-12.1	0.0273438	-0.0766602	-0.0351563	-0.0522461	-0.00390625	-0.168945	0.0131836
-12	0.0249023	-0.0766602	-0.0351563	-0.0522461	-0.00390625	-0.168945	0.0131836
-11.9	0.015625	-0.0766602	-0.0351563	-0.0522461	-0.00390625	-0.157227	0.00390625
-11.8	0.0141602	-0.0766602	-0.0351563	-0.0639648	-0.00390625	-0.157227	-0.00244141
-11.7	0.0102539	-0.0742188	-0.0327148	-0.0615234	-0.00146484	-0.154785	0
-11.6	0.0195313	-0.0634766	-0.0234375	-0.0600586	0.0078125	-0.145508	0.0170898
-11.5	0.0195313	-0.0571289	-0.0234375	-0.0600586	0.0078125	-0.145508	0.0170898
-11.4	0.0078125	-0.0585938	-0.0351563	-0.0717773	-0.00390625	-0.149414	0.00537109
-11.3	0.00537109	-0.0649414	-0.046875	-0.0717773	-0.00390625	-0.149414	-0.00244141
-11.2	-0.00146484	-0.0625	-0.0444336	-0.0693359	-0.00146484	-0.146973	0
-11.1	0.0078125	-0.0532227	-0.0327148	-0.0600586	0.0078125	-0.137695	0.00927734
-11	0.0209961	-0.0400391	-0.0126953	-0.046875	0.0209961	-0.124512	0.0224609
-10.9	0.015625	-0.0361328	-0.0273438	-0.0522461	0.0131836	-0.129883	0.0170898
-10.8	0.0141602	-0.046875	-0.0288086	-0.0537109	0.0102539	-0.131348	0.015625
-10.7	0.0078125	-0.0532227	-0.0351563	-0.0600586	0.00390625	-0.137695	0.00927734
-10.6	0.0078125	-0.0517578	-0.0336914	-0.0600586	0.00537109	-0.13623	0.0107422
-10.5	0.0078125	-0.0454102	-0.0273438	-0.0600586	0.0117188	-0.129883	0.0170898
-10.4	0.00537109	-0.0454102	-0.0273438	-0.0600586	0.0141602	-0.129883	0.0170898
-10.3	-0.00390625	-0.0454102	-0.0273438	-0.0585938	0.0234375	-0.129883	0.0170898
-10.2	-0.00390625	-0.0478516	-0.0351563	-0.0522461	0.015625	-0.129883	0.0170898
-10.1	-0.0234375	-0.0649414	-0.0429688	-0.0600586	0.015625	-0.137695	0.00683594
-10	-0.0117188	-0.0571289	-0.0429688	-0.0600586	0.015625	-0.137695	-0.00244141
-9.9	-0.0117188	-0.0571289	-0.0429688	-0.0600586	0.015625	-0.137695	-0.00244141
-9.8	-0.0131836	-0.0571289	-0.0351563	-0.0600586	0.015625	-0.137695	-0.00244141
-9.7	-0.0195313	-0.0585938	-0.0366211	-0.0600586	0.015625	-0.137695	-0.00244141
-9.6	-0.0078125	-0.0649414	-0.0429688	-0.0600586	0.0170898	-0.137695	0.00390625
-9.5	-0.0078125	-0.0649414	-0.0454102	-0.0600586	0.0234375	-0.137695	-0.00878906
-9.4	-0.0078125	-0.0649414	-0.0546875	-0.0600586	0.0234375	-0.125977	-0.00244141
-9.3	-0.00634766	-0.0649414	-0.0429688	-0.0600586	0.0351563	-0.137695	-0.00244141
-9.2	-0.0117188	-0.0766602	-0.0546875	-0.0717773	0.0234375	-0.137695	-0.0141602
-9.1	-0.00537109	-0.078125	-0.0561523	-0.0732422	0.0102539	-0.13916	-0.015625
-9	-0.0117188	-0.0727539	-0.0625	-0.0795898	0.00390625	-0.157227	-0.0336914
-8.9	-0.0195313	-0.0712891	-0.0610352	-0.078125	0.00537109	-0.155762	-0.0297852
-8.8	-0.0078125	-0.0454102	-0.0429688	-0.0600586	0.0234375	-0.135254	-0.00244141
-8.7	-0.0117188	-0.0571289	-0.0546875	-0.0639648	0.0117188	-0.137695	-0.00244141
-8.6	-0.0117188	-0.0571289	-0.0546875	-0.0639648	0.0117188	-0.137695	-0.00244141
-8.5	-0.0117188	-0.0571289	-0.0429688	-0.0639648	0.0141602	-0.137695	-0.00244141
-8.4	-0.0117188	-0.0571289	-0.0429688	-0.0522461	0.0209961	-0.137695	-0.00244141
-8.3	-0.0170898	-0.0625	-0.0483398	-0.0576172	0.00634766	-0.143066	-0.0078125
-8.2	-0.0078125	-0.0532227	-0.0390625	-0.0498047	0.0078125	-0.133789	0.00146484
-8.1	-0.0102539	-0.0556641	-0.0415039	-0.0703125	0.00537109	-0.13623	-0.000976563
-8	-0.0170898	-0.0625	-0.0483398	-0.0771484	0.000976563	-0.129883	-0.0078125
-7.9	-0.0078125	-0.0532227	-0.0405273	-0.0678711	0.0195313	-0.114258	0.00292969
-7.8	-0.0078125	-0.0415039	-0.046875	-0.0561523	0.0195313	-0.114258	0.00927734
-7.7	-0.0102539	-0.0439453	-0.0415039	-0.0585938	0.0170898	-0.128418	0.00683594
-7.6	-0.03125	-0.0649414	-0.0703125	-0.0795898	-0.00390625	-0.146973	-0.0141602
-7.5	-0.0336914	-0.0649414	-0.0703125	-0.078125	-0.00390625	-0.137695	-0.0141602
-7.4	-0.0405273	-0.0649414	-0.0703125	-0.0717773	-0.00390625	-0.137695	-0.0141602
-7.3	-0.03125	-0.0649414	-0.0703125	-0.0717773	-0.00390625	-0.137695	-0.0141602
-7.2	-0.03125	-0.0673828	-0.0703125	-0.0639648	-0.00244141	-0.137695	-0.0141602
-7.1	-0.03125	-0.0766602	-0.0610352	-0.0717773	0.00390625	-0.145508	-0.0141602
-7	-0.0375977	-0.0844727	-0.0625	-0.0795898	-0.00390625	-0.145508	-0.0219727
-6.9	-0.03125	-0.078125	-0.0625	-0.0717773	-0.00390625	-0.145508	-0.0219727
-6.8	-0.03125	-0.0844727	-0.0625	-0.0717773	-0.00390625	-0.145508	-0.0336914
-6.7	-0.0327148	-0.0742188	-0.0639648	-0.0810547	-0.00537109	-0.146973	-0.0351563
-6.6	-0.03125	-0.0751953	-0.0625	-0.0795898	-0.015625	-0.15332	-0.0336914
-6.5	-0.03125	-0.0844727	-0.0639648	-0.0795898	-0.0131836	-0.15332	-0.0336914
-6.4	-0.0297852	-0.0830078	-0.0673828	-0.0703125	-0.00244141	-0.151855	-0.0205078
-6.3	-0.0249023	-0.0664063	-0.0561523	-0.0732422	0.00244141	-0.146973	-0.015625
-6.2	-0.03125	-0.0727539	-0.0717773	-0.0795898	-0.00390625	-0.15332	-0.0219727
-6.1	-0.0366211	-0.0805664	-0.0859375	-0.0874023	-0.0117188	-0.161133	-0.0273438
-6	-0.0219727	-0.0727539	-0.078125	-0.0771484	-0.00244141	-0.15332	-0.0102539
-5.9	-0.03125	-0.0751953	-0.0805664	-0.0703125	0.00146484	-0.154297	-0.0126953
-5.8	-0.0390625	-0.0922852	-0.0976563	-0.0874023	-0.015625	-0.165039	-0.0219727
-5.7	-0.0390625	-0.09375	-0.0898438	-0.0874023	-0.015625	-0.165039	-0.0219727
-5.6	-0.0415039	-0.102539	-0.0922852	-0.0883789	-0.0180664	-0.179199	-0.0244141
-5.5	-0.0429688	-0.104004	-0.0922852	-0.0834961	-0.0195313	-0.168945	-0.0258789
-5.4	-0.0429688	-0.104004	-0.0874023	-0.0810547	-0.0273438	-0.180664	-0.0258789
-5.3	-0.0444336	-0.105469	-0.0952148	-0.0732422	-0.0288086	-0.182129	-0.0273438
-5.2	-0.0585938	-0.119629	-0.109375	-0.0874023	-0.0429688	-0.18457	-0.0415039
-5.1	-0.0585938	-0.119629	-0.109375	-0.0874023	-0.0429688	-0.196289	-0.0415039
-5	-0.0585938	-0.131348	-0.109375	-0.0859375	-0.0429688	-0.196289	-0.0415039
-4.9	-0.0571289	-0.129883	-0.117188	-0.0913086	-0.0546875	-0.204102	-0.0415039
-4.8	-0.0522461	-0.111816	-0.117188	-0.0795898	-0.0546875	-0.21582	-0.0415039
-4.7	-0.0571289	-0.111816	-0.115723	-0.0898438	-0.0610352	-0.21582	-0.0400391
-4.6	-0.0507813	-0.104004	-0.109375	-0.0717773	-0.0664063	-0.202637	-0.0336914
-4.5	-0.0507813	-0.104004	-0.111816	-0.0732422	-0.0664063	-0.188477	-0.0336914
-4.4	-0.0507813	-0.111816	-0.121094	-0.0898438	-0.0664063	-0.197754	-0.0336914
-4.3	-0.0493164	-0.102539	-0.121094	-0.0834961	-0.0678711	-0.204102	-0.0336914
-4.2	-0.0444336	-0.105469	-0.121094	-0.0834961	-0.0727539	-0.202637	-0.0336914
-4.1	-0.0507813	-0.104004	-0.121094	-0.0849609	-0.078125	-0.209473	-0.0336914
-4	-0.0507813	-0.111816	-0.121094	-0.0976563	-0.078125	-0.21582	-0.0219727
-3.9	-0.0429688	-0.106445	-0.115723	-0.0952148	-0.078125	-0.208008	-0.0141602
-3.8	-0.0390625	-0.104004	-0.113281	-0.0913086	-0.078125	-0.206543	-0.00244141
-3.7	-0.0493164	-0.104004	-0.125	-0.100586	-0.078125	-0.208008	-0.0219727
-3.6	-0.0458984	-0.105469	-0.112305	-0.100586	-0.0756836	-0.197754	-0.0102539
-3.5	-0.0415039	-0.106445	-0.104004	-0.09375	-0.0664063	-0.196289	0.00292969
-3.4	-0.0610352	-0.10791	-0.119629	-0.100586	-0.0585938	-0.188477	-0.0078125
-3.3	-0.0561523	-0.117188	-0.124023	-0.0810547	-0.0561523	-0.189941	-0.015625
-3.2	-0.0625	-0.127441	-0.127441	-0.0898438	-0.0664063	-0.196289	-0.0258789
-3.1	-0.0625	-0.135254	-0.130371	-0.0795898	-0.0546875	-0.18457	-0.0219727
-3	-0.0727539	-0.149414	-0.135254	-0.0820313	-0.0595703	-0.201172	-0.0439453
-2.9	-0.0795898	-0.166504	-0.152344	-0.0810547	-0.0678711	-0.208008	-0.0532227
-2.8	-0.0820313	-0.186035	-0.164063	-0.0991211	-0.0727539	-0.208008	-0.0532227
-2.7	-0.0795898	-0.183594	-0.161621	-0.0966797	-0.0654297	-0.213379	-0.0610352
-2.6	-0.078125	-0.176758	-0.160156	-0.0952148	-0.0625	-0.205566	-0.0610352
-2.5	-0.0844727	-0.178223	-0.166504	-0.0991211	-0.0546875	-0.196289	-0.0649414
-2.4	-0.0898438	-0.186035	-0.165527	-0.101563	-0.0429688	-0.190918	-0.0532227
-2.3	-0.0922852	-0.193848	-0.17041	-0.109375	-0.0478516	-0.188477	-0.0493164
-2.2	-0.0966797	-0.179688	-0.165527	-0.104492	-0.0522461	-0.197754	-0.0351563
-2.1	-0.12207	-0.18457	-0.192383	-0.117188	-0.0742188	-0.202637	-0.0541992
-2	-0.103027	-0.164063	-0.17334	-0.103027	-0.0561523	-0.188477	-0.0444336
-1.9	-0.09375	-0.165039	-0.152344	-0.100586	-0.0507813	-0.200195	-0.0415039
-1.8	-0.0771484	-0.14209	-0.14209	-0.0834961	-0.0405273	-0.193848	-0.0219727
-1.7	-0.0673828	-0.141602	-0.140625	-0.105469	-0.0244141	-0.183105	-0.0205078
-1.6	-0.0600586	-0.132813	-0.167969	-0.108398	-0.0507813	-0.174316	-0.0288086
-1.5	-0.0532227	-0.137695	-0.167969	-0.103027	-0.0507813	-0.165039	-0.0244141
-1.4	-0.078125	-0.13916	-0.200195	-0.132813	-0.0688477	-0.175293	-0.0454102
-1.3	-0.0805664	-0.143066	-0.209961	-0.134277	-0.0717773	-0.200195	-0.0556641
-1.2	-0.0561523	-0.105469	-0.181152	-0.0942383	-0.0429688	-0.227539	-0.046875
-1.1	-0.0234375	-0.0581055	-0.141602	-0.0571289	-0.0493164	-0.206543	-0.0541992
-1	-0.0561523	-0.0795898	-0.153809	-0.0966797	-0.106934	-0.234375	-0.0952148
-0.9	-0.0507813	-0.0649414	-0.149902	-0.104492	-0.126465	-0.233887	-0.0883789
-0.8	-0.0336914	-0.0532227	-0.106934	-0.0874023	-0.132813	-0.186035	-0.0703125
-0.7	-0.0283203	-0.00341797	-0.0673828	-0.0546875	-0.137695	-0.171387	-0.050293
-0.6	0.0219727	0.0219727	-0.0366211	-0.0498047	-0.128906	-0.172852	-0.046875
-0.5	0.0219727	0.0327148	-0.0366211	-0.0507813	-0.14209	-0.189941	-0.0415039
-0.4	0.0234375	0.0405273	-0.00537109	-0.0498047	-0.103027	-0.161133	-0.0219727
-0.3	0.0249023	0.0419922	0.0146484	-0.0600586	-0.10791	-0.162109	-0.0283203
-0.2	0.0415039	0.0375977	-0.0078125	-0.0405273	-0.114746	-0.136719	-0.0273438
-0.1	0.0678711	0.0629883	0.0429688	0.0141602	-0.0664063	0	-0.00244141
7.11e-15	0	0	0	0	-0.0419922	0.0209961	0
0.099999	-0.0078125	-0.0395508	-0.0742188	-0.0581055	0	-0.378906	0.0522461
0.199997	0	-0.00830078	0.0136719	-0.0712891	0.106934	-0.436523	0.0834961
0.299999	0.0888672	0.0957031	0.13916	0.00878906	0.137207	-0.387207	0.128906
0.399998	0.0917969	0.0991211	0.171875	0.0161133	0.0957031	-0.313477	0.145996
0.5	0.126953	0.163574	0.203125	0.0649414	0.125	-0.235352	0.200684
0.599998	0.101563	0.138184	0.161621	0.0507813	0.114746	-0.200195	0.157227
0.699997	0.0566406	0.122559	0.150391	0.0200195	0.0708008	-0.164551	0.124512
0.799999	0.0327148	0.160645	0.104492	0.0454102	0.124023	-0.0546875	0.116211
0.899998	-0.0297852	0.0585938	-0.0195313	0.0766602	0.0351563	-0.00244141	0.192871
1	-0.0834961	-0.0761719	-0.111816	0.0380859	-0.13916	-0.0947266	0.216309
1.1*	0.0439453	-0.0102539	-0.0234375	0.131348	-0.0625	0.0209961	0.144531
1.2*	0.0561523	0.0351563	0.414063	-0.0078125	0.165527	-0.0532227	-0.0263672
1.3*	-0.0253906	-0.232422	-0.162109	-0.285156	0.202148	6.68945	0.0444336
1.4*	-1.12402	-2.31104	-3.88525	-0.759277	-4.51855	18.0537	3.20947
1.5*	-1.78125	-3.49951	-6.26807	0.243652	-10.3618	23.8037	17.9092
1.6*	-0.721191	-2.25586	-4.10645	2.21631	-7.33154	15.8081	36.0684
1.7*	0.0532227	-0.458984	-0.0112305	2.75293	2.51172	9.86377	34.6577
1.8*	0.707031	0.10791	1.34766	2.30518	7.11182	9.94531	22.6704
1.9*	0.542969	0.90918	2.37646	2.94385	6.96484	12.6782	21.999
2*	1.08838	1.21484	2.92529	3.95801	8.17725	17.021	26.125
2.1*	0.895996	1.37012	3.40723	4.84619	9.2124	21.2422	31.0415
2.2	1.29785	1.71631	3.42041	6.14502	10.7109	25.6602	35.519
2.3	1.12939	1.80664	3.40479	7.11865	11.8618	29.3262	38.9434
2.4	1.10059	1.99414	3.6582	7.75537	13.5146	32.4067	41.752
2.5	0.959473	1.979	4.16357	8.96191	15.1738	35.2681	44.0854
2.6	1.09912	2.26758	4.52881	9.96777	17.1357	37.5933	46.1113
2.7	1.3335	2.56299	5.05371	11.2842	19.0762	39.7676	47.8726
2.8	1.42041	2.73193	5.40625	12.1079	20.8384	41.4209	48.8076
2.9	1.60156	3.19971	6.04053	13.1211	22.6802	42.9082	49.9028
3	1.82227	3.35107	6.67139	14.2173	24.5293	44.229	50.9814
3.1	1.93164	3.47607	7.28955	15.356	26.2593	45.1099	52.0317
3.2	2.11963	3.85791	7.7876	16.2134	27.8066	45.9697	52.7197
3.3	2.20313	4.02441	8.18506	17.0039	29.3042	46.5889	53.1025
3.4	2.29688	4.25635	8.62744	17.7939	30.7422	47.1968	53.6108
3.5	2.50146	4.57178	9.14404	18.7173	31.8765	47.8931	54.2041
3.6	2.58057	4.75684	9.58984	19.4961	32.9961	48.124	54.5908
3.7	2.67334	4.94287	10.043	20.3369	34.0483	48.4561	54.9702
3.8	2.76025	5.19141	10.4648	21.1221	34.9907	48.7021	55.2319
3.9	2.84277	5.42236	10.8726	21.8179	35.8896	49.0723	55.5005
4	2.81494	5.53906	11.2188	22.3911	36.5923	49.2373	55.7383
4.1	2.92041	5.79053	11.6416	23.0581	37.3345	49.4702	56.0308
4.2	3.03027	6.06396	12.1592	23.8086	38.0186	49.7217	56.3818
4.3	3.15479	6.31396	12.6016	24.4961	38.6406	49.9771	56.5576
4.4	3.31006	6.58887	13.0405	25.1821	39.1733	50.1528	56.7515
4.5	3.42578	6.84521	13.4634	25.7656	39.6602	50.3442	56.9639
4.6	3.55322	7.08203	13.8633	26.2964	40.147	50.4937	57.1484
4.7	3.68115	7.31006	14.2046	26.8696	40.5132	50.624	57.3491
4.8	3.76709	7.47412	14.5376	27.3555	40.9141	50.7959	57.5327
4.9	3.85645	7.63574	14.8882	27.9072	41.3032	50.9585	57.6343
5	3.93115	7.78906	15.186	28.4258	41.5757	51.1201	57.7007
5.1	3.99219	7.9624	15.5376	28.7314	41.8032	51.2607	57.7749
5.2	4.10547	8.16162	15.8936	29.0859	42.0522	51.4121	57.8896
5.3	4.20166	8.32715	16.2134	29.4087	42.2134	51.5156	57.9521
5.4	4.27344	8.48291	16.5234	29.7158	42.4048	51.5679	57.9907
5.5	4.35693	8.65771	16.8296	30.0625	42.5874	51.6436	58.0825
5.6	4.45703	8.86621	17.1758	30.3984	42.7842	51.7598	58.1851
5.7	4.54834	9.0249	17.4258	30.6548	42.9126	51.8218	58.2749
5.8	4.64551	9.2251	17.7173	30.9683	43.0923	51.9131	58.3921
5.9	4.74219	9.41699	17.9937	31.2813	43.2852	51.9678	58.4131
6	4.86621	9.61377	18.2891	31.5688	43.4585	52.0161	58.4663
6.1	4.96436	9.76416	18.5845	31.833	43.5869	52.0757	58.5078
6.2	5.06787	9.91553	18.8257	32.0625	43.7046	52.1279	58.5186
6.3	5.146	10.0303	19.0234	32.3008	43.7725	52.2021	58.564
6.4	5.21875	10.1826	19.2461	32.5088	43.8423	52.2544	58.6265
6.5	5.27881	10.2983	19.457	32.7134	43.8921	52.2544	58.6553
6.6	5.36572	10.4312	19.6929	32.875	43.9517	52.2866	58.7124
6.7	5.45947	10.5938	19.8994	33.0283	44.0195	52.3271	58.7749
6.8	5.5625	10.7373	20.1421	33.2017	44.0859	52.3804	58.8281
6.9	5.60156	10.8359	20.3594	33.3555	44.1226	52.3989	58.8467
7	5.67969	10.9546	20.5571	33.458	44.1626	52.4546	58.8867
7.1	5.74609	11.0796	20.7671	33.561	44.2266	52.5005	58.9116
7.2	5.87891	11.2593	20.918	33.7095	44.3218	52.5835	59.0186
7.3	5.92969	11.396	21.0586	33.8384	44.3672	52.6294	59.0742
7.4	6.01807	11.5547	21.2393	33.9775	44.4463	52.6821	59.1367
7.5	6.07422	11.667	21.4092	34.0718	44.5093	52.7285	59.1865
7.6	6.16797	11.8008	21.5557	34.1987	44.5923	52.7827	59.2319
7.7	6.26025	11.9482	21.7515	34.3242	44.6694	52.8506	59.3008
7.8	6.32568	12.0742	21.8931	34.4165	44.7446	52.9248	59.3569
7.9	6.36963	12.1929	22.0171	34.5322	44.8071	52.9639	59.4077
8	6.46484	12.3149	22.1938	34.6299	44.8828	52.9951	59.4727
8.1	6.53662	12.4443	22.353	34.7017	44.9468	53.0693	59.5474
8.2	6.58203	12.5366	22.4805	34.7891	45.0063	53.1045	59.5913
8.3	6.59375	12.6318	22.6069	34.8306	45.0522	53.1123	59.6045
8.4	6.6499	12.7646	22.7876	34.9219	45.1055	53.1631	59.6577
8.5	6.70947	12.8892	22.9102	34.9854	45.1445	53.21	59.7212
8.6	6.7749	12.9927	23.0234	35.0391	45.2031	53.2505	59.7739
8.7	6.84375	13.1069	23.1719	35.1235	45.25	53.2725	59.8218
8.8	6.88525	13.1743	23.2642	35.1558	45.2734	53.2656	59.8228
8.9	6.93896	13.2764	23.3906	35.2227	45.2969	53.2871	59.8467
9	6.97266	13.3521	23.4951	35.2993	45.3257	53.3271	59.8677
9.1	7.00635	13.4634	23.6221	35.3916	45.3462	53.3857	59.875
9.2	7.05225	13.5562	23.7007	35.4517	45.3726	53.3818	59.8765
9.3	7.11572	13.6484	23.8047	35.4946	45.3955	53.4014	59.918
9.4	7.18262	13.7334	23.9155	35.5664	45.4521	53.4482	59.9575
9.5	7.2251	13.8022	23.9736	35.6089	45.4595	53.4663	59.9648
9.6	7.25	13.8765	24.0562	35.6445	45.4741	53.4966	59.9976
9.7	7.28369	13.9258	24.1289	35.7041	45.4829	53.5132	60.0195
9.8	7.34375	14.0054	24.2266	35.7539	45.4858	53.5146	60.0366
9.9	7.40771	14.0757	24.2979	35.8096	45.5142	53.542	60.064
10	7.45166	14.1475	24.3584	35.8438	45.5132	53.5396	60.0693
10.1	7.521	14.2368	24.4385	35.8916	45.5313	53.5679	60.1079
10.2	7.59521	14.3364	24.499	35.918	45.5859	53.6035	60.1528
10.3	7.64795	14.4141	24.5869	35.9399	45.625	53.6235	60.168
10.4	7.68799	14.4731	24.6162	35.9478	45.6304	53.6426	60.1646
10.5	7.71729	14.5376	24.6602	36.0024	45.668	53.667	60.1953
10.6	7.76318	14.6123	24.7524	36.0337	45.7017	53.6982	60.2461
10.7	7.80322	14.6602	24.8022	36.0547	45.7212	53.6982	60.2773
10.8	7.84619	14.7358	24.8486	36.0869	45.7578	53.7266	60.3193
10.9	7.89453	14.7969	24.8921	36.1001	45.7983	53.7388	60.3335
11	7.94678	14.8755	24.9663	36.1289	45.8438	53.7637	60.3677
11.1	7.96875	14.9038	24.9883	36.1299	45.8672	53.771	60.3735
11.2	8.02734	14.9531	25.0337	36.1484	45.9087	53.7842	60.4077
11.3	8.05078	14.9873	25.0679	36.1626	45.9297	53.8257	60.4155
11.4	8.1001	15.0469	25.1235	36.2173	45.9702	53.8662	60.439
11.5	8.13818	15.0928	25.146	36.2368	45.9766	53.8755	60.4492
11.6	8.20557	15.1743	25.229	36.2822	46.0063	53.9141	60.4897
11.7	8.25684	15.2349	25.2827	36.3491	46.0664	53.9551	60.5186
11.8	8.28516	15.2632	25.3022	36.3447	46.0757	53.9521	60.5342
11.9	8.32666	15.3125	25.3447	36.3501	46.0742	53.9521	60.5391
12	8.38818	15.3608	25.4116	36.3711	46.0977	53.9849	60.5889
12.1	8.42676	15.4053	25.4556	36.3862	46.125	54.0132	60.6274
12.2	8.46875	15.4688	25.4961	36.4087	46.1392	54.0552	60.6553
12.3	8.50391	15.4951	25.5068	36.4233	46.1265	54.0342	60.6475
12.4	8.56641	15.5742	25.5649	36.4761	46.1719	54.064	60.7056
12.5	8.60791	15.6211	25.5947	36.5063	46.1924	54.1016	60.7373
12.6	8.63965	15.6763	25.6396	36.5405	46.2397	54.1074	60.7866
12.7	8.67822	15.7148	25.6704	36.5386	46.2866	54.1265	60.8281
12.8	8.69922	15.7334	25.7046	36.5469	46.2915	54.1411	60.8467
12.9	8.71875	15.7734	25.7031	36.5454	46.293	54.1436	60.8672
13	8.72266	15.8062	25.7305	36.5518	46.3086	54.1553	60.8896
13.1	8.76953	15.8477	25.7471	36.583	46.3477	54.1968	60.918
13.2	8.77734	15.896	25.7437	36.5977	46.332	54.1997	60.9131
13.3	8.81885	15.9351	25.7681	36.6196	46.3633	54.2031	60.9297
13.4	8.82715	15.9653	25.7959	36.6211	46.3843	54.2246	60.9468
13.5	8.84229	15.9897	25.8125	36.6328	46.4009	54.249	60.9443
13.6	8.85791	16.0337	25.8579	36.6245	46.4165	54.2749	60.9492
13.7	8.88428	16.042	25.8726	36.625	46.4116	54.3115	60.9443
13.8	8.91797	16.0952	25.8867	36.6392	46.4116	54.3521	60.9585
13.9	8.93066	16.1274	25.915	36.6377	46.415	54.3633	60.9673
14	8.95996	16.1567	25.9404	36.6406	46.4365	54.3872	60.9912
14.1	8.9751	16.1836	25.9751	36.6626	46.4502	54.4287	61.0132
14.2	9.01953	16.2163	26.0259	36.6885	46.4546	54.4536	61.0342
14.3	9.02881	16.2178	26.0366	36.6899	46.4648	54.4639	61.0366
14.4	9.03906	16.2412	26.0586	36.6797	46.4766	54.4624	61.0664
14.5	9.05859	16.2539	26.0874	36.6704	46.4883	54.4756	61.0771
14.6	9.08838	16.2539	26.0962	36.6885	46.4868	54.4717	61.0952
14.7	9.13574	16.2959	26.124	36.7188	46.5029	54.4927	61.1357
14.8	9.13135	16.3008	26.1025	36.7158	46.4932	54.4702	61.1523
14.9	9.16016	16.2983	26.1289	36.7329	46.5093	54.4756	61.1694
15	9.1875	16.3218	26.1484	36.7524	46.5469	54.4795	61.1812
15.1	9.20703	16.3452	26.1953	36.7578	46.5547	54.4834	61.2021
15.2	9.23828	16.3623	26.1758	36.7485	46.5664	54.5044	61.2046
15.3	9.26318	16.396	26.1875	36.7681	46.5742	54.5029	61.2227
15.4	9.25635	16.4453	26.1968	36.7798	46.5962	54.5249	61.2451
15.5	9.27734	16.4663	26.207	36.811	46.5991	54.5239	61.2554
15.6	9.30078	16.4663	26.207	36.811	46.6055	54.5146	61.2554
15.7	9.28906	16.4888	26.207	36.811	46.6172	54.5356	61.2788
15.8	9.32031	16.4937	26.2095	36.8188	46.625	54.5601	61.2749
15.9	9.3374	16.5039	26.2397	36.8188	46.6343	54.563	61.292
16	9.34229	16.5132	26.2524	36.8252	46.6196	54.5679	61.293
16.1	9.33984	16.5249	26.2578	36.8242	46.6147	54.542	61.3062
16.2	9.34912	16.5327	26.2695	36.8306	46.6328	54.5474	61.3179
16.3	9.35547	16.5522	26.2788	36.8384	46.6353	54.5615	61.3232
16.4	9.38525	16.5703	26.2915	36.8501	46.6821	54.5796	61.332
16.5	9.37891	16.5889	26.2749	36.8501	46.6733	54.5732	61.3374
16.6	9.39063	16.5859	26.2798	36.8501	46.668	54.5771	61.3506
16.7	9.3999	16.6138	26.2983	36.8501	46.6851	54.5732	61.3647
16.8	9.43994	16.6274	26.3291	36.8735	46.7251	54.6084	61.3867
16.9	9.46338	16.646	26.3506	36.9009	46.7461	54.6162	61.4053
17	9.47949	16.667	26.3438	36.9087	46.7539	54.6123	61.3984
17.1	9.479	16.6733	26.3501	36.9009	46.7578	54.6045	61.4077
17.2	9.50781	16.6929	26.3555	36.9087	46.7539	54.6255	61.417
17.3	9.51709	16.7007	26.3555	36.8984	46.7749	54.6318	61.4429
17.4	9.5166	16.7266	26.3813	36.9316	46.7939	54.6445	61.4595
17.5	9.521	16.7358	26.3867	36.9517	46.7969	54.6489	61.478
17.6	9.53516	16.7461	26.3906	36.939	46.8164	54.6514	61.4976
17.7	9.55469	16.7749	26.418	36.9619	46.8374	54.6631	61.5303
17.8	9.5625	16.7856	26.4116	36.9712	46.8657	54.667	61.5288
17.9	9.59766	16.7852	26.4204	36.9727	46.8491	54.6787	61.5273
18	9.61572	16.8242	26.4297	36.9893	46.8853	54.7241	61.5366
18.1	9.59912	16.8271	26.4258	36.9907	46.875	54.7153	61.5366
18.2	9.60791	16.8335	26.4297	37.0024	46.8765	54.7358	61.5381
18.3	9.63525	16.8438	26.4556	37.0283	46.8813	54.7646	61.543
18.4	9.64063	16.8569	26.4702	37.043	46.8945	54.7646	61.5586
18.5	9.66162	16.8647	26.4907	37.0518	46.918	54.7881	61.5796
18.6	9.67725	16.874	26.4976	37.0796	46.9194	54.813	61.5903
18.7	9.65771	16.8545	26.4858	37.0649	46.9219	54.8232	61.5967
18.8	9.68457	16.8711	26.5024	37.0767	46.9321	54.8311	61.6118
18.9	9.69922	16.8843	26.5093	37.0962	46.9248	54.8452	61.6265
19	9.72021	16.9131	26.5376	37.1104	46.9492	54.8755	61.6475
19.1	9.73682	16.9414	26.5664	37.126	46.9595	54.8906	61.6523
19.2	9.76953	16.9468	26.5884	37.1431	46.9766	54.916	61.6797
19.3	9.78125	16.9678	26.6094	37.1563	46.9883	54.9155	61.6997
19.4	9.80078	16.9727	26.6187	37.1587	46.9937	54.9326	61.6953
19.5	9.82666	16.9844	26.6235	37.1611	47.0049	54.9443	61.7085
19.6	9.84668	17.0029	26.6343	37.1758	47.0249	54.9521	61.7139
19.7	9.85547	17.0068	26.6265	37.1797	47.0234	54.9653	61.7266
19.8	9.84473	17	26.6313	37.1753	47.0234	54.9727	61.7241
19.9	9.86865	17.0195	26.6509	37.2017	47.0337	54.9873	61.7368
20	9.86719	17.0264	26.6655	37.2188	47.0264	54.9927	61.7505
20.1	9.88525	17.0327	26.6758	37.229	47.0415	55.0029	61.7539
20.2	9.87793	17.0327	26.6875	37.229	47.0327	55.0029	61.7568
20.3	9.8877	17.0444	26.6953	37.2471	47.0439	55.0029	61.7671
20.4	9.90381	17.0469	26.7095	37.2539	47.0483	55.0054	61.7813
20.5	9.91406	17.063	26.7266	37.2446	47.0625	55.0239	61.7764
20.6	9.90771	17.0547	26.7256	37.25	47.0679	55.0249	61.7866
20.7	9.92432	17.0615	26.7251	37.2524	47.0625	55.0317	61.7842
20.8	9.90869	17.0649	26.7251	37.2378	47.0728	55.021	61.7734
20.9	9.91162	17.085	26.7373	37.2397	47.0757	55.0137	61.7866
21	9.93896	17.0874	26.7368	37.2563	47.0938	55.0132	61.7881
21.1	9.95557	17.1069	26.7681	37.269	47.1064	55.0342	61.8188
21.2	9.95459	17.1187	26.7671	37.2773	47.1147	55.0537	61.8247
21.3	9.94531	17.1108	26.7578	37.2798	47.1172	55.0537	61.8086
21.4	9.95557	17.1304	26.7734	37.2773	47.1147	55.0537	61.814
21.5	9.95068	17.1108	26.7593	37.2705	47.1079	55.0459	61.7998
21.6	9.96338	17.1304	26.772	37.2837	47.1226	55.0537	61.8218
21.7	9.98193	17.1226	26.7686	37.2852	47.1274	55.0669	61.8203
21.8	9.98438	17.1436	26.7617	37.2759	47.1343	55.0718	61.8271
21.9	9.96484	17.1235	26.7549	37.2681	47.1235	55.0615	61.8125
22	9.97656	17.1372	26.7686	37.2798	47.1343	55.0747	61.8286
22.1	9.97656	17.1343	26.7642	37.2798	47.125	55.0796	61.8267
22.2	9.99072	17.1445	26.7656	37.3018	47.147	55.0874	61.8374
22.3	10	17.1538	26.7656	37.3096	47.1445	55.0967	61.8296
22.4	9.99756	17.1538	26.7578	37.3022	47.1563	55.0957	61.8286
22.5	9.99854	17.1538	26.772	37.3188	47.1563	55.0898	61.8345
22.6	10.0078	17.1553	26.7686	37.3188	47.1641	55.0918	61.8481
22.7	10.0195	17.1719	26.7666	37.3369	47.1758	55.1133	61.8579
22.8	10.0249	17.1719	26.7749	37.3398	47.1812	55.1216	61.8662
22.9	10.0181	17.167	26.7681	37.333	47.1782	55.1147	61.8594
23	10.0405	17.1841	26.7881	37.3374	47.2046	55.1426	61.8755
23.1	10.0454	17.1821	26.7954	37.3472	47.2148	55.1523	61.8828
23.2	10.0391	17.1851	26.7773	37.3423	47.2236	55.1553	61.8789
23.3	10.0391	17.1865	26.7969	37.3491	47.2397	55.1543	61.895
23.4	10.0508	17.2056	26.8086	37.3511	47.2461	55.1641	61.9063
23.5	10.0576	17.2153	26.814	37.3594	47.2515	55.1724	61.9155
23.6	10.0674	17.2251	26.8164	37.3721	47.2563	55.1748	61.9272
23.7	10.0757	17.2271	26.8242	37.3804	47.2749	55.1841	61.9468
23.8	10.0586	17.2227	26.8164	37.376	47.2563	55.1914	61.939
23.9	10.0688	17.2241	26.8252	37.3774	47.2734	55.2139	61.9531
24	10.0781	17.2124	26.8179	37.3774	47.2734	55.2129	61.9404
24.1	10.0913	17.2178	26.8101	37.3892	47.2852	55.2241	61.96
24.2	10.1079	17.2329	26.8228	37.3892	47.2876	55.2319	61.9751
24.3	10.1094	17.2349	26.8154	37.3892	47.3076	55.2246	61.9756
24.4	10.1172	17.2422	26.8135	37.397	47.3018	55.2319	61.9741
24.5	10.1133	17.2437	26.8164	37.3931	47.3086	55.2412	61.9766
24.6	10.1289	17.2578	26.8203	37.4214	47.3359	55.2554	62.0093
24.7	10.1289	17.2568	26.8101	37.4351	47.3257	55.2764	62.0005
24.8	10.1313	17.2461	26.8228	37.4282	47.3267	55.2842	62.0063
24.9	10.1475	17.2661	26.8374	37.4478	47.3467	55.3027	62.0278
25	10.1377	17.2642	26.8369	37.4385	47.333	55.3125	62.0259
25.1	10.1357	17.2739	26.8413	37.4414	47.335	55.3223	62.0356
25.2	10.1509	17.2759	26.8594	37.4595	47.3447	55.332	62.0454
25.3	10.1499	17.2778	26.8452	37.4609	47.3467	55.3262	62.0474
25.4	10.1572	17.2837	26.8359	37.4683	47.3525	55.3335	62.0547
25.5	10.1602	17.2866	26.8369	37.4712	47.3594	55.353	62.0781
25.6	10.1616	17.2856	26.8491	37.4712	47.3662	55.356	62.0693
25.7	10.1704	17.2734	26.8608	37.4609	47.354	55.3623	62.0757
25.8	10.1772	17.292	26.8735	37.479	47.3633	55.3623	62.0835
25.9	10.1704	17.2837	26.8672	37.4907	47.3774	55.3726	62.0874
26	10.1865	17.2959	26.8662	37.4868	47.3936	55.373	62.0952
26.1	10.1885	17.3062	26.876	37.4985	47.4033	55.375	62.1094
26.2	10.1899	17.3164	26.8867	37.4995	47.4063	55.3857	62.1265
26.3	10.1904	17.3154	26.8789	37.5015	47.4077	55.374	62.1279
26.4	10.186	17.3047	26.8765	37.5024	47.4141	55.3833	62.1484
26.5	10.1992	17.3257	26.8892	37.5308	47.4165	55.4053	62.1694
26.6	10.2085	17.3271	26.9063	37.5405	47.4233	55.4131	62.1772
26.7	10.2173	17.3335	26.918	37.5493	47.4165	55.4233	62.1772
26.8	10.2085	17.3359	26.9087	37.5518	47.4351	55.4287	62.1787
26.9	10.2197	17.3398	26.9297	37.5635	47.4463	55.4429	62.1978
27	10.2305	17.353	26.9297	37.5781	47.4468	55.4458	62.2085
27.1	10.2373	17.3481	26.9365	37.5806	47.4453	55.4443	62.2075
27.2	10.229	17.3374	26.9165	37.5703	47.439	55.4482	62.207
27.3	10.2554	17.3491	26.9351	37.5884	47.4517	55.4731	62.228
27.4	10.2275	17.3335	26.915	37.5776	47.4375	55.4663	62.228
27.5	10.2437	17.335	26.917	37.5913	47.4561	55.4941	62.2476
27.6	10.2461	17.3306	26.9165	37.5894	47.4424	55.4922	62.2476
27.7	10.2578	17.3467	26.9312	37.5991	47.4521	55.5122	62.2661
27.8	10.25	17.3516	26.9282	37.5908	47.4556	55.4976	62.2656
27.9	10.25	17.3477	26.9385	37.6118	47.4775	55.5068	62.2876
28	10.2461	17.3428	26.9272	37.6064	47.4741	55.5029	62.2866
28.1	10.2578	17.3452	26.9287	37.6016	47.4648	55.5029	62.2974
28.2	10.25	17.3374	26.9204	37.6118	47.457	55.4951	62.3071
28.3	10.2485	17.3374	26.936	37.6182	47.4688	55.5068	62.3101
28.4	10.2412	17.3374	26.9287	37.6133	47.4688	55.5264	62.3208
28.5	10.2368	17.3374	26.9375	37.6289	47.4766	55.5239	62.3257
28.6	10.2422	17.3452	26.9385	37.6206	47.4766	55.5171	62.3384
28.7	10.2437	17.3467	26.9507	37.6367	47.4873	55.5254	62.3403
28.8	10.251	17.353	26.957	37.6431	47.4854	55.5234	62.3477
28.9	10.2593	17.3594	26.9648	37.6494	47.5039	55.5317	62.375
29	10.2524	17.3477	26.9595	37.6377	47.5078	55.5156	62.3608
29.1	10.2671	17.3638	26.9766	37.6538	47.5234	55.5254	62.3755
29.2	10.2578	17.3516	26.9766	37.6587	47.5234	55.5342	62.3828
29.3	10.272	17.3452	26.9766	37.6494	47.5234	55.5405	62.3789
29.4	10.2671	17.3438	26.9688	37.6509	47.5352	55.5317	62.3857
29.5	10.2578	17.3364	26.9678	37.6499	47.5366	55.5239	62.396
29.6	10.272	17.3359	26.9541	37.6479	47.5439	55.5313	62.396
29.7	10.2788	17.3438	26.9688	37.6626	47.5327	55.5317	62.4077
29.8	10.2695	17.3364	26.9678	37.6616	47.5249	55.5225	62.4092
29.9	10.2578	17.3335	26.9658	37.6689	47.5322	55.5249	62.4165
30	10.2803	17.3452	26.9819	37.6899	47.5459	55.5449	62.438
30.1	10.2861	17.3555	26.9961	37.7002	47.5532	55.5444	62.4438
30.2	10.2891	17.3623	26.9961	37.707	47.5547	55.5498	62.4561
30.3	10.2866	17.3516	26.9946	37.6953	47.5547	55.5342	62.4443
30.4	10.2783	17.3477	26.9883	37.687	47.5547	55.5352	62.436
30.5	10.2803	17.3677	26.9897	37.7031	47.5664	55.5566	62.4521
30.6	10.2954	17.3711	27.0024	37.7148	47.5742	55.5615	62.4546
30.7	10.2749	17.3506	26.9961	37.7041	47.5718	55.5591	62.4521
30.8	10.2813	17.3545	27.0093	37.7134	47.5767	55.564	62.457
30.9	10.2954	17.3594	27.0156	37.7266	47.5859	55.5732	62.4639
31	10.2969	17.3608	27.0234	37.7261	47.5938	55.5811	62.4634
31.1	10.2983	17.3633	27.0259	37.7305	47.6055	55.5928	62.4756
31.2	10.2891	17.3584	27.021	37.7227	47.6055	55.5864	62.4678
31.3	10.2915	17.3765	27.0415	37.7417	47.6172	55.6055	62.4858
31.4	10.2983	17.375	27.0483	37.7329	47.6172	55.6084	62.4844
31.5	10.2852	17.3755	27.0469	37.7397	47.624	55.6177	62.4873
31.6	10.2827	17.3711	27.0352	37.7368	47.6211	55.6216	62.4937
31.7	10.2656	17.3623	27.0327	37.7266	47.6196	55.6201	62.4912
31.8	10.2783	17.353	27.0361	37.73	47.6274	55.625	62.4946
31.9	10.2915	17.3618	27.0469	37.7432	47.6445	55.6382	62.5171
32	10.2998	17.3662	27.0469	37.7515	47.646	55.6489	62.5171
32.1	10.3071	17.3818	27.0703	37.7471	47.6641	55.6528	62.5288
32.2	10.3008	17.375	27.0586	37.7549	47.665	55.646	62.5288
32.3	10.3008	17.3828	27.0586	37.7524	47.668	55.6538	62.5273
32.4	10.3076	17.3833	27.0654	37.7593	47.6748	55.6543	62.5278
32.5	10.3149	17.3906	27.0728	37.7681	47.6719	55.6748	62.5366
32.6	10.311	17.396	27.0571	37.769	47.6846	55.6748	62.5366
32.7	10.3101	17.396	27.0654	37.7734	47.6865	55.6826	62.5381
32.8	10.3164	17.3984	27.0635	37.7915	47.686	55.6968	62.5454
32.9	10.3188	17.4077	27.0806	37.7939	47.7041	55.7061	62.5562
33	10.3281	17.4092	27.0889	37.8047	47.7085	55.7061	62.5562
33.1	10.3306	17.4155	27.0884	37.8135	47.7148	55.7061	62.5586
33.2	10.3389	17.4155	27.0977	37.8228	47.728	55.7153	62.5669
33.3	10.3359	17.4131	27.1069	37.8203	47.7319	55.7202	62.5625
33.4	10.3369	17.4048	27.1001	37.8135	47.7236	55.7256	62.5562
33.5	10.3374	17.4155	27.1069	37.8306	47.7383	55.7231	62.5562
33.6	10.3296	17.4146	27.0991	37.832	47.7373	55.7139	62.5693
33.7	10.3477	17.4141	27.1064	37.8384	47.7236	55.7241	62.5767
33.8	10.3491	17.4233	27.1084	37.8516	47.7397	55.7466	62.5786
33.9	10.3564	17.4351	27.1143	37.8589	47.7461	55.7554	62.5781
34	10.3569	17.4351	27.1172	37.8696	47.7524	55.7622	62.585
34.1	10.3501	17.4365	27.1187	37.8735	47.75	55.7632	62.5796
34.2	10.3594	17.4429	27.125	37.8867	47.7749	55.7725	62.6055
34.3	10.3569	17.4414	27.1328	37.876	47.7734	55.7817	62.5967
34.4	10.3486	17.4453	27.1274	37.8838	47.772	55.7749	62.5884
34.5	10.3506	17.4653	27.1367	37.8945	47.7764	55.7959	62.5903
34.6	10.3438	17.4492	27.125	37.8867	47.7617	55.7896	62.5835
34.7	10.3447	17.4453	27.1367	37.8799	47.7705	55.7944	62.5859
34.8	10.3452	17.4521	27.1367	37.8877	47.771	55.8101	62.6055
34.9	10.3271	17.4482	27.1382	37.875	47.7656	55.7974	62.5928
35	10.3369	17.457	27.1445	37.8892	47.7681	55.8154	62.5991
35.1	10.3398	17.4727	27.1431	37.8892	47.7866	55.8208	62.6069
35.2	10.3389	17.4653	27.1499	37.8882	47.7788	55.8232	62.6177
35.3	10.3486	17.4751	27.1563	37.8994	47.7915	55.8374	62.6157
35.4	10.3398	17.4858	27.1689	37.9175	47.7876	55.8545	62.6289
35.5	10.3413	17.4873	27.1616	37.9102	47.7959	55.8442	62.6396
35.6	10.3408	17.4858	27.168	37.9204	47.7939	55.8555	62.6382
35.7	10.3491	17.4844	27.1782	37.9204	47.8062	55.8638	62.6445
35.8	10.3296	17.4678	27.1592	37.9204	47.7866	55.856	62.6514
35.9	10.3369	17.4844	27.1665	37.9307	47.8018	55.8711	62.6577
36	10.3374	17.5029	27.1875	37.9517	47.8164	55.8833	62.6655
36.1	10.3374	17.4922	27.1953	37.9595	47.8218	55.8936	62.6758
36.2	10.3281	17.4858	27.1938	37.9688	47.8242	55.8921	62.6748
36.3	10.3281	17.4912	27.1904	37.9531	47.8257	55.8965	62.6577
36.4	10.3398	17.5054	27.1978	37.9697	47.8267	55.9053	62.6694
36.5	10.3291	17.5063	27.1953	37.98	47.8369	55.9023	62.6772
36.6	10.3398	17.5093	27.2056	38	47.8452	55.9131	62.6836
36.7	10.3506	17.5186	27.2007	38.0024	47.8374	55.9043	62.6904
36.8	10.3477	17.5225	27.2163	38.0078	47.8413	55.9131	62.7061
36.9	10.3438	17.5132	27.2031	37.9985	47.8306	55.9077	62.6929
37	10.3486	17.5078	27.2173	38.001	47.8384	55.9053	62.6978
37.1	10.3491	17.5234	27.2251	38.0195	47.8452	55.9028	62.7061
37.2	10.353	17.5303	27.2319	38.0313	47.8438	55.9053	62.6968
37.3	10.3555	17.5249	27.2266	38.0386	47.8462	55.9155	62.6968
37.4	10.3579	17.5249	27.2188	38.0415	47.8569	55.9209	62.6968
37.5	10.3491	17.5239	27.2163	38.0483	47.8438	55.895	62.6968
37.6	10.3579	17.5352	27.2236	38.0464	47.8555	55.9131	62.7109
37.7	10.3647	17.5444	27.2383	38.0664	47.8633	55.9209	62.7256
37.8	10.3579	17.543	27.25	38.061	47.8657	55.9233	62.7178
37.9	10.3506	17.5498	27.2607	38.0688	47.8584	55.916	62.7295
38	10.3477	17.564	27.2656	38.0781	47.875	55.9248	62.7422
38.1	10.3564	17.5547	27.2681	38.0698	47.8633	55.9233	62.7358
38.2	10.3569	17.5732	27.2827	38.0781	47.875	55.9429	62.7422
38.3	10.3501	17.5571	27.2666	38.0806	47.876	55.939	62.7422
38.4	10.3579	17.5562	27.2695	38.0674	47.8843	55.9536	62.749
38.5	10.3623	17.5669	27.2764	38.0718	47.875	55.9575	62.7476
38.6	10.3647	17.5718	27.2837	38.0884	47.8867	55.9834	62.7568
38.7	10.3564	17.5728	27.2798	38.0854	47.8828	55.9717	62.7437
38.8	10.3672	17.5874	27.2944	38.0977	47.8945	55.9897	62.7539
38.9	10.3584	17.5786	27.2983	38.1001	47.896	55.9888	62.7466
39	10.354	17.5811	27.3032	38.1094	47.9126	56.0029	62.7539
39.1	10.3398	17.5625	27.2944	38.0859	47.9038	55.9927	62.7358
39.2	10.3452	17.564	27.2969	38.0869	47.8921	55.9897	62.7451
39.3	10.3486	17.5757	27.3057	38.0908	47.897	55.9976	62.7578
39.4	10.3506	17.5718	27.2959	38.0991	47.9023	56.002	62.7671
39.5	10.3579	17.5835	27.3071	38.1167	47.9141	56.0117	62.7749
39.6	10.3579	17.5874	27.3179	38.1211	47.9258	56.0239	62.7788
39.7	10.3608	17.585	27.3047	38.1094	47.9155	56.0161	62.7866
39.8	10.3789	17.604	27.3164	38.1284	47.9424	56.0313	62.7983
39.9	10.3813	17.6147	27.3252	38.1392	47.9478	56.0483	62.8086
40	10.396	17.6133	27.3281	38.1274	47.9546	56.0513	62.8154
40.1	10.3882	17.6138	27.335	38.1392	47.9546	56.0552	62.8154
40.2	10.3931	17.6147	27.3359	38.1367	47.9634	56.063	62.8125
40.3	10.4009	17.6226	27.3447	38.1416	47.9648	56.0625	62.8281
40.4	10.3975	17.624	27.3467	38.1577	47.9663	56.0747	62.8364
40.5	10.397	17.6328	27.3477	38.1572	47.9829	56.0708	62.8242
40.6	10.3892	17.6226	27.3369	38.147	47.9648	56.0625	62.8281
40.7	10.3984	17.6328	27.3452	38.1587	47.9766	56.0654	62.835
40.8	10.4092	17.6357	27.3491	38.1665	47.9858	56.0864	62.8374
40.9	10.4063	17.6436	27.353	38.1704	47.9961	56.0825	62.8467
41	10.4087	17.6235	27.3462	38.1665	47.9922	56.082	62.8359
41.1	10.4087	17.6382	27.354	38.1689	47.9946	56.0747	62.8477
41.2	10.3984	17.6343	27.3477	38.1626	47.9844	56.0679	62.8374
41.3	10.3999	17.6343	27.3555	38.1509	47.9858	56.0723	62.8364
41.4	10.4204	17.6382	27.3501	38.1509	47.9932	56.0757	62.8345
41.5	10.4312	17.6357	27.3662	38.1602	47.9976	56.0811	62.8389
41.6	10.4351	17.6436	27.3672	38.168	48.0054	56.0825	62.8491
41.7	10.415	17.6313	27.3564	38.1494	47.9946	56.0835	62.8452
41.8	10.4312	17.645	27.3779	38.1782	48.0171	56.1006	62.8647
41.9	10.4375	17.6445	27.3774	38.1704	48.0244	56.0952	62.8711
42	10.4243	17.6523	27.3843	38.1768	48.0249	56.1138	62.874
42.1	10.4312	17.6567	27.3867	38.1836	48.0171	56.1123	62.8779
42.2	10.4258	17.6445	27.3774	38.1782	48.0127	56.1147	62.8853
42.3	10.4399	17.6743	27.397	38.1792	48.0298	56.1357	62.8906
42.4	10.4414	17.6553	27.3789	38.1719	48.0249	56.1226	62.8896
42.5	10.4492	17.6592	27.3896	38.1812	48.0264	56.1294	62.8896
42.6	10.4272	17.6514	27.3735	38.165	48.0142	56.1255	62.8882
42.7	10.4189	17.6431	27.3672	38.1611	48.0039	56.1123	62.8843
42.8	10.4209	17.645	27.3672	38.1733	48.0078	56.124	62.8882
42.9	10.4321	17.6548	27.3906	38.1792	48.0181	56.1382	62.896
43	10.4351	17.6553	27.3843	38.1821	48.0249	56.1396	62.9077
43.1	10.4258	17.6421	27.375	38.1772	48.0054	56.1255	62.9038
43.2	10.4282	17.6367	27.375	38.1792	48.0259	56.1436	62.9077
43.3	10.4287	17.6372	27.3672	38.1616	48.0156	56.1216	62.8975
43.4	10.436	17.6406	27.3726	38.1665	48.0249	56.1226	62.9141
43.5	10.4282	17.6343	27.3657	38.1675	48.0142	56.124	62.9155
43.6	10.4321	17.6343	27.3853	38.1704	48.0273	56.124	62.918
43.7	10.4468	17.6328	27.3672	38.168	48.022	56.1226	62.9272
43.8	10.4507	17.6333	27.3789	38.1782	48.0288	56.1216	62.939
43.9	10.4478	17.6367	27.3906	38.1729	48.0273	56.1162	62.939
44	10.439	17.6343	27.3882	38.1812	48.0234	56.1123	62.9263
44.1	10.458	17.646	27.4063	38.187	48.0352	56.1265	62.9438
44.2	10.4609	17.646	27.4126	38.1899	48.0415	56.1333	62.9561
44.3	10.4561	17.6421	27.4077	38.189	48.0342	56.123	62.9351
44.4	10.4673	17.6421	27.4258	38.1948	48.0454	56.1289	62.9546
44.5	10.4663	17.646	27.4243	38.1992	48.0532	56.1333	62.9468
44.6	10.4697	17.6523	27.4297	38.2026	48.0469	56.1328	62.9673
44.7	10.4678	17.6357	27.4258	38.2007	48.0562	56.123	62.9575
44.8	10.4648	17.6514	27.4351	38.1978	48.0601	56.1304	62.9663
44.9	10.458	17.6353	27.4204	38.2017	48.0557	56.1357	62.9673
45	10.4585	17.6318	27.4233	38.1963	48.0547	56.1343	62.9678
45.1	10.4585	17.6343	27.4258	38.189	48.0654	56.1348	62.9575
45.2	10.4697	17.6265	27.4258	38.1909	48.0557	56.1382	62.9556
45.3	10.4585	17.625	27.4243	38.1821	48.0522	56.1411	62.9585
45.4	10.4585	17.6177	27.417	38.189	48.0562	56.1436	62.9639
45.5	10.4688	17.6172	27.4189	38.1909	48.0674	56.1421	62.9609
45.6	10.4688	17.6255	27.4209	38.2007	48.0771	56.1489	62.981
45.7	10.4688	17.6235	27.415	38.1885	48.0635	56.1514	62.9751
45.8	10.4751	17.6343	27.4297	38.207	48.0835	56.1616	62.9756
45.9	10.4712	17.6343	27.4297	38.1987	48.0742	56.1553	62.978
46	10.4819	17.6343	27.4248	38.2031	48.0742	56.1646	62.9741
46.1	10.478	17.624	27.4102	38.207	48.064	56.1631	62.978
46.2	10.4658	17.604	27.3955	38.187	48.0532	56.1523	62.9741
46.3	10.4678	17.6138	27.3999	38.2007	48.0742	56.166	62.9858
46.4	10.4697	17.6157	27.3984	38.1924	48.0664	56.1616	62.978
46.5	10.4727	17.6162	27.4063	38.2056	48.0781	56.1553	62.9844
46.6	10.4678	17.6045	27.4063	38.1797	48.0664	56.1411	62.9771
46.7	10.4648	17.6226	27.418	38.1987	48.0742	56.146	62.9751
46.8	10.4751	17.6211	27.4243	38.1992	48.0835	56.1528	62.9756
46.9	10.46	17.6045	27.4092	38.1836	48.0742	56.1436	62.9717
47	10.4541	17.5977	27.4087	38.186	48.0728	56.1436	62.9741
47.1	10.4595	17.6069	27.4258	38.187	48.0664	56.1436	62.9868
47.2	10.4795	17.6069	27.4258	38.2031	48.0757	56.1514	62.9888
47.3	10.4751	17.6123	27.4258	38.2134	48.0806	56.1606	62.9922
47.4	10.457	17.5923	27.4243	38.1885	48.0742	56.1406	62.9858
47.5	10.4702	17.606	27.4312	38.2202	48.0874	56.166	63.0068
47.6	10.4658	17.6055	27.4336	38.2065	48.0908	56.1602	63.0117
47.7	10.4795	17.6216	27.4453	38.2227	48.1045	56.1621	63.0186
47.8	10.4766	17.6196	27.4453	38.229	48.104	56.1719	63.0234
47.9	10.4673	17.6265	27.4351	38.229	48.1147	56.167	63.0171
48	10.4609	17.6265	27.4268	38.2275	48.1079	56.1748	63.0273
48.1	10.4673	17.6328	27.4375	38.2329	48.1235	56.1724	63.0264
48.2	10.457	17.624	27.4351	38.2329	48.1147	56.1733	63.0156
48.3	10.4429	17.6147	27.4258	38.2397	48.1172	56.1738	63.0107
48.4	10.4492	17.6265	27.4375	38.2378	48.125	56.1836	63.0288
48.5	10.4482	17.6162	27.4258	38.2397	48.1133	56.1855	63.0249
48.6	10.436	17.6201	27.4155	38.2275	48.1147	56.1748	63.0264
48.7	10.4399	17.6235	27.4072	38.2212	48.1079	56.1836	63.0366
48.8	10.4482	17.6255	27.4209	38.229	48.125	56.1973	63.0381
48.9	10.4346	17.6235	27.4063	38.2314	48.125	56.1929	63.0454
49	10.4375	17.6265	27.4048	38.25	48.1226	56.2007	63.0537
49.1	10.4482	17.6333	27.4053	38.2476	48.1211	56.2051	63.0444
49.2	10.4385	17.625	27.3955	38.2495	48.1274	56.1968	63.0483
49.3	10.4351	17.6328	27.3867	38.2407	48.1226	56.1997	63.0366
49.4	10.4282	17.6343	27.3984	38.2485	48.1143	56.2031	63.0454
49.5	10.4429	17.6382	27.3984	38.2524	48.1226	56.1973	63.0396
49.6	10.4556	17.6357	27.3984	38.2603	48.1265	56.2021	63.0469
49.7	10.4375	17.6172	27.3867	38.2603	48.1143	56.2031	63.0483
49.8	10.4507	17.6333	27.3984	38.2603	48.1279	56.2192	63.0552
49.9	10.4429	17.6289	27.3921	38.2656	48.1211	56.2192	63.0522
50	10.4463	17.625	27.3853	38.2588	48.1211	56.2109	63.0532
50.1	10.4429	17.624	27.3975	38.2798	48.125	56.2168	63.0591
50.2	10.4375	17.625	27.3916	38.2681	48.1157	56.21	63.0532
50.3	10.4453	17.6333	27.4077	38.2813	48.1436	56.2217	63.0576
50.4	10.4492	17.6353	27.4063	38.2861	48.1338	56.2163	63.0679
50.5	10.457	17.6382	27.4063	38.2773	48.146	56.231	63.0742
50.6	10.4463	17.6343	27.4087	38.269	48.1338	56.2227	63.0562
50.7	10.4585	17.6328	27.4243	38.2798	48.146	56.2231	63.0679
50.8	10.4492	17.6372	27.4194	38.2905	48.146	56.2231	63.0757
50.9	10.4492	17.6289	27.418	38.2886	48.1572	56.2319	63.0679
51	10.4492	17.6318	27.418	38.2891	48.1538	56.2256	63.0654
51.1	10.4468	17.6343	27.4272	38.293	48.1553	56.2334	63.0679
51.2	10.4438	17.6289	27.4268	38.3003	48.1533	56.2373	63.0679
51.3	10.457	17.6553	27.4272	38.3125	48.1655	56.2451	63.0796
51.4	10.4312	17.6343	27.417	38.2983	48.146	56.2441	63.0757
51.5	10.4492	17.6484	27.415	38.3096	48.1729	56.25	63.0898
51.6	10.4478	17.6631	27.4258	38.3174	48.1733	56.2622	63.1045
51.7	10.4492	17.6548	27.4258	38.3188	48.1782	56.2656	63.1079
51.8	10.4375	17.6577	27.4243	38.3174	48.1821	56.2646	63.1162
51.9	10.4468	17.6646	27.4194	38.3125	48.1865	56.2754	63.106
52	10.4321	17.6538	27.418	38.311	48.186	56.2749	63.1079
52.1	10.4468	17.6641	27.4297	38.3213	48.2056	56.292	63.1187
52.2	10.4492	17.667	27.439	38.3218	48.1982	56.2856	63.1294
52.3	10.4429	17.6694	27.4438	38.3164	48.1914	56.2881	63.1211
52.4	10.4385	17.6563	27.4375	38.3081	48.1953	56.2749	63.1069
52.5	10.439	17.6631	27.4375	38.311	48.1938	56.2935	63.1187
52.6	10.4312	17.6514	27.4375	38.3101	48.1865	56.2739	63.1147
52.7	10.4385	17.6353	27.4321	38.3081	48.1846	56.2852	63.1069
52.8	10.4272	17.6357	27.4351	38.2993	48.1875	56.2842	63.1069
52.9	10.4272	17.624	27.4155	38.2983	48.1826	56.2832	63.1045
53	10.4375	17.6226	27.4282	38.2964	48.1743	56.2734	63.1157
53.1	10.4478	17.6367	27.4375	38.311	48.1963	56.2842	63.1187
53.2	10.457	17.6421	27.4351	38.2993	48.1865	56.2842	63.1201
53.3	10.4468	17.6436	27.4438	38.3086	48.1929	56.2739	63.124
53.4	10.4385	17.6353	27.4399	38.3018	48.1978	56.2749	63.1274
53.5	10.4482	17.6333	27.4507	38.3101	48.2031	56.2832	63.1255
53.6	10.4492	17.6328	27.4546	38.3057	48.207	56.2803	63.125
53.7	10.4478	17.6289	27.4478	38.3018	48.1938	56.2813	63.1094
53.8	10.4478	17.6357	27.4556	38.3086	48.1875	56.2959	63.1162
53.9	10.4429	17.6147	27.4507	38.2876	48.1748	56.2817	63.1201
54	10.4492	17.6265	27.4648	38.3018	48.186	56.2866	63.1353
54.1	10.4438	17.6147	27.4648	38.2969	48.1899	56.292	63.1357
54.2	10.4312	17.6162	27.4688	38.2915	48.1797	56.2974	63.1304
54.3	10.4468	17.6211	27.4946	38.3057	48.2046	56.3101	63.1445
54.4	10.4375	17.6162	27.478	38.3008	48.1953	56.3052	63.1396
54.5	10.4634	17.6211	27.4961	38.3188	48.2212	56.3232	63.146
54.6	10.4517	17.6172	27.4893	38.3198	48.207	56.3242	63.146
54.7	10.4585	17.6372	27.5015	38.3242	48.2202	56.3262	63.1577
54.8	10.4712	17.6353	27.5195	38.3423	48.2344	56.3452	63.1655
54.9	10.4678	17.6333	27.5068	38.3374	48.2241	56.3535	63.1655
55	10.458	17.625	27.5063	38.3276	48.2368	56.3438	63.1772
55.1	10.4663	17.6318	27.5024	38.3164	48.2407	56.3403	63.1772
55.2	10.4595	17.6235	27.5078	38.3198	48.2461	56.3438	63.186
55.3	10.478	17.645	27.5078	38.3242	48.2461	56.3677	63.188
55.4	10.4634	17.6353	27.5195	38.3306	48.2407	56.3687	63.1914
55.5	10.4678	17.6396	27.521	38.3306	48.2451	56.3848	63.1958
55.6	10.4541	17.6343	27.522	38.3306	48.2446	56.3828	63.1938
55.7	10.4663	17.6406	27.5132	38.3384	48.2603	56.3911	63.1968
55.8	10.4531	17.6279	27.5103	38.332	48.2476	56.3896	63.1982
55.9	10.4751	17.646	27.5273	38.3486	48.2656	56.4014	63.2148
56	10.4585	17.6343	27.5264	38.3398	48.2539	56.3755	63.1958
56.1	10.4766	17.6445	27.5244	38.3462	48.2656	56.3896	63.2148
56.2	10.4712	17.6577	27.5415	38.3511	48.2603	56.3945	63.2173
56.3	10.4907	17.6553	27.5562	38.354	48.2749	56.4028	63.2178
56.4	10.4795	17.6343	27.5483	38.3413	48.2554	56.3936	63.2178
56.5	10.479	17.6421	27.5674	38.3472	48.2744	56.3936	63.2251
56.6	10.4912	17.6357	27.5693	38.3555	48.2686	56.3989	63.231
56.7	10.4751	17.6406	27.5649	38.3555	48.2603	56.4014	63.2241
56.8	10.479	17.625	27.5547	38.3472	48.2446	56.3906	63.2266
56.9	10.4897	17.645	27.5537	38.3687	48.2671	56.4067	63.2466
57	10.4883	17.6353	27.5557	38.3604	48.2734	56.4053	63.2446
57.1	10.4976	17.645	27.5601	38.3804	48.2866	56.4146	63.2607
57.2	10.5181	17.6445	27.5728	38.3877	48.3057	56.4326	63.2749
57.3	10.5088	17.6367	27.561	38.3784	48.2993	56.4351	63.2563
57.4	10.5107	17.6577	27.5693	38.3921	48.3076	56.4561	63.2725
57.5	10.4961	17.6514	27.5547	38.3774	48.3101	56.4521	63.2725
57.6	10.5049	17.6445	27.5635	38.3862	48.3018	56.4639	63.2773
57.7	10.5107	17.6592	27.5576	38.3921	48.3101	56.4639	63.2764
57.8	10.4985	17.6563	27.5532	38.3799	48.3047	56.4546	63.2656
57.9	10.5195	17.6709	27.5586	38.3955	48.3125	56.4731	63.2852
58	10.5195	17.6655	27.5576	38.3921	48.3164	56.4653	63.27
58.1	10.5195	17.668	27.5674	38.3901	48.3164	56.4858	63.2813
58.2	10.521	17.6787	27.5679	38.3945	48.3281	56.4937	63.2881
58.3	10.5361	17.6875	27.5869	38.4229	48.3447	56.5146	63.3071
58.4	10.5264	17.6929	27.5771	38.4272	48.3545	56.5044	63.3076
58.5	10.5283	17.6875	27.5674	38.4175	48.3579	56.5234	63.3179
58.6	10.5288	17.7061	27.5874	38.4321	48.3853	56.5239	63.3164
58.7	10.5273	17.7046	27.5796	38.4375	48.3804	56.5332	63.3193
58.8	10.5273	17.6929	27.5859	38.4282	48.3774	56.521	63.3257
58.9	10.5327	17.6841	27.5781	38.4321	48.3975	56.5342	63.3271
59	10.5376	17.6821	27.5767	38.4282	48.3828	56.5225	63.3359
59.1	10.5391	17.6772	27.5874	38.4204	48.3813	56.5225	63.3335
59.2	10.5532	17.6797	27.5869	38.4346	48.3867	56.5234	63.3398
59.3	10.5562	17.6943	27.5781	38.4375	48.3853	56.5122	63.335
59.4	10.5483	17.6865	27.5889	38.4414	48.3779	56.5186	63.3389
59.5	10.5571	17.6851	27.5742	38.4463	48.375	56.5459	63.3452
59.6	10.5586	17.6743	27.5688	38.4282	48.3838	56.5483	63.3555
59.7	10.5469	17.6748	27.5664	38.4282	48.374	56.5591	63.3765
59.8	10.5469	17.6772	27.5586	38.4282	48.3774	56.585	63.3765
59.9	10.5649	17.6992	27.5532	38.4321	48.4102	56.5967	63.3804
60	10.5898	17.7358	27.5928	38.4634	48.4438	56.6304	63.396
60.1	10.585	17.7373	27.5898	38.4414	48.4482	56.6152	63.3882
60.2	10.5571	17.7437	27.625	38.4268	48.4517	56.5718	63.3765
60.3	10.583	17.7563	27.6392	38.4502	48.4634	56.6094	63.3774
60.4	10.6108	17.771	27.6211	38.4468	48.4648	56.5957	63.3833
60.5	10.6069	17.771	27.6211	38.4126	48.4702	56.5562	63.3594
60.6	10.6353	17.8022	27.6523	38.4541	48.5024	56.5669	63.3882
60.7	10.668	17.7983	27.6484	38.4775	48.5117	56.499	63.3843
60.8	10.6665	17.8179	27.6226	38.4795	48.4819	56.4448	63.3428
60.9	10.707	17.7671	27.6011	38.5864	48.4712	56.2998	63.3643
61	10.7085	17.7661	27.7793	38.478	48.5879	56.1724	63.564
61.1*	10.6118	17.7515	27.9575	38.4697	48.7334	56.1948	63.5146
61.2*	10.6772	17.5942	27.9287	38.4585	48.8765	59.3271	63.396
61.3*	10.4512	17.6504	27.7363	39.0303	48.6567	74.4746	63.5918
61.4*	9.73145	18.311	25.9541	42.459	46.9487	90.9756	68.9375
61.5*	9.58057	18.7603	24.9204	45.7378	47.1602	92.6445	94.8203
61.6*	10.0249	18.6934	28.2539	46.0649	55.8779	88.5449	123.154
61.7*	10.75	19.1968	31.0366	45.3955	62.7891	83.5742	130.726
61.8*	10.7295	18.7983	32.5742	44.9155	64.3853	79.688	127.514
61.9*	11.3896	19.0107	33.3467	44.5952	64.4429	76.7046	122.261
62*	11.3701	18.9663	33.5093	43.7329	63.1528	73.4697	115.925
62.1*	10.9063	18.9243	33.1597	42.9082	62.1406	70.4399	109.595
62.2*	11.1733	18.7036	32.7583	42.4453	61.0352	67.8027	103.762
62.3*	11.145	18.5879	32.1509	41.9194	59.3813	65.6489	98.7031
62.4*	11.1743	18.6772	31.9287	41.6533	57.7227	63.7725	93.7505
62.5*	11.2935	18.5835	31.2866	40.6665	56.4868	61.856	89.0483
62.6*	10.9619	18.3394	30.7612	40.0356	54.8301	59.8296	84.6572
62.7*	11.0923	18.4102	30.2939	39.3384	53.333	58.2202	80.8174
62.8*	10.8628	18.0361	29.6558	38.6743	51.7368	56.7627	77.562
62.9*	10.7891	18.043	29.1016	38.0278	50.4722	55.2549	74.4438
63*	10.7993	17.9609	28.6328	37.4053	49.2178	53.9312	71.6523
63.1*	10.7749	17.7178	28.1333	36.7773	47.9976	52.4502	68.8901
63.2*	10.6699	17.519	27.7383	36.0591	46.6719	51.3091	66.3042
63.3*	10.4648	17.3726	27.3413	35.3892	45.5747	50.1284	63.8608
63.4	10.2422	17.2788	26.877	34.9663	44.5742	49.0176	61.7886
63.5	10.4375	17.1343	26.439	34.4888	43.8179	47.8721	59.8784
63.6	10.4751	16.9727	26.2017	34.0142	42.9028	46.9624	58.2168
63.7	10.3813	16.7451	25.8735	33.4229	42.0742	46.064	56.623
63.8	10.3662	16.564	25.5405	32.9478	41.3335	45.0317	55.3872
63.9	10.207	16.4404	25.1328	32.3491	40.6055	44.3467	53.8218
64	10.0688	16.1929	24.7329	31.7393	39.8657	43.6226	52.6504
64.1	9.87891	15.9688	24.3125	31.3159	39.0791	42.7383	51.4751
64.2	9.80029	15.7612	24.002	30.8667	38.3237	41.9531	50.4229
64.3	9.64941	15.5444	23.6782	30.4019	37.6924	41.1836	49.4321
64.4	9.53662	15.335	23.396	29.957	37.0483	40.4185	48.4468
64.5	9.46484	15.2134	23.0938	29.5791	36.4385	39.7515	47.4741
64.6	9.42773	15.1099	22.8257	29.1914	35.8896	39.2686	46.5112
64.7	9.37891	15.0117	22.5103	28.7861	35.3032	38.7163	45.5313
64.8	9.2998	14.7959	22.1147	28.3359	34.7188	38.0449	44.8271
64.9	9.21729	14.6328	21.7798	27.9673	34.1851	37.4209	44.1304
65	9.09375	14.4507	21.5054	27.5547	33.6431	36.7153	43.3569
65.1	8.96484	14.2725	21.1992	27.1729	33.1367	36.1108	42.6914
65.2	8.84766	14.103	20.9385	26.7993	32.6641	35.6006	42.0093
65.3	8.77344	13.9219	20.6826	26.375	32.1821	35.0474	41.3062
65.4	8.67041	13.7632	20.4229	26.0229	31.7305	34.5391	40.668
65.5	8.54688	13.5874	20.1602	25.625	31.2593	34.02	40.0313
65.6	8.48193	13.4233	19.8999	25.25	30.8062	33.5435	39.4028
65.7	8.38281	13.2734	19.6572	24.9683	30.333	33.043	38.7524
65.8	8.26172	13.1123	19.417	24.6772	29.9141	32.6099	38.2271
65.9	8.146	12.9585	19.1338	24.3823	29.5078	32.1475	37.6992
66	8.01563	12.8022	18.9458	24.0508	29.0732	31.6895	37.1929
66.1	7.88672	12.5952	18.6704	23.7158	28.6118	31.2163	36.6265
66.2	7.81348	12.4468	18.4517	23.397	28.2563	30.8101	36.1055
66.3	7.72949	12.292	18.21	23.0679	27.8623	30.3926	35.5786
66.4	7.61084	12.1187	17.9609	22.7407	27.4673	29.9507	35.0537
66.5	7.49707	11.9727	17.7119	22.3784	27.0845	29.5054	34.522
66.6	7.40771	11.8076	17.4937	22.1226	26.7188	29.1006	34.0132
66.7	7.30859	11.6709	17.2827	21.8384	26.353	28.6919	33.5186
66.8	7.22021	11.5273	17.0596	21.583	25.9961	28.2646	33.0313
66.9	7.1377	11.3945	16.8633	21.311	25.6289	27.8428	32.5391
67	7.09131	11.2686	16.6421	21.0454	25.3164	27.417	32.0889
67.1	7.01953	11.1396	16.4336	20.7749	24.9741	27.042	31.6592
67.2	6.94922	10.9741	16.2188	20.519	24.6313	26.7046	31.2695
67.3	6.87256	10.8257	16.0093	20.2578	24.271	26.395	30.8374
67.4	6.79541	10.6821	15.7744	19.9946	23.9829	26.0562	30.4697
67.5	6.70459	10.5527	15.5693	19.7173	23.6499	25.7231	30.1021
67.6	6.64307	10.4126	15.3945	19.4595	23.3516	25.3999	29.7241
67.7	6.56641	10.2959	15.2056	19.229	23.0532	25.0537	29.3398
67.8	6.47803	10.1514	14.9976	18.979	22.7358	24.731	28.9756
67.9	6.39697	9.99854	14.8188	18.751	22.4297	24.4194	28.5913
68	6.30762	9.91455	14.6382	18.5273	22.1274	24.0967	28.1968
68.1	6.21973	9.79297	14.4531	18.272	21.8374	23.7749	27.8164
68.2	6.14746	9.68506	14.2344	18.0571	21.5625	23.4629	27.4482
68.3	6.07666	9.6123	14.0767	17.8291	21.2837	23.1709	27.1382
68.4	6	9.50781	13.8999	17.5938	20.9883	22.9063	26.7891
68.5	5.95459	9.4248	13.7656	17.3892	20.7749	22.6685	26.4717
68.6	5.90088	9.31641	13.6016	17.1704	20.5171	22.417	26.1484
68.7	5.85938	9.22559	13.457	16.9766	20.3047	22.1646	25.8364
68.8	5.79053	9.12256	13.2788	16.7705	20.043	21.8999	25.5195
68.9	5.75635	9.03516	13.1455	16.5806	19.8252	21.6406	25.2368
69	5.70703	8.93652	12.9873	16.3735	19.5796	21.3457	24.938
69.1	5.67188	8.83594	12.8408	16.2119	19.3462	21.0889	24.6704
69.2	5.61865	8.74512	12.7085	16.0117	19.1396	20.8467	24.3989
69.3	5.57666	8.65625	12.5767	15.8291	18.9243	20.603	24.1367
69.4	5.54688	8.55225	12.4663	15.6602	18.7031	20.3521	23.8374
69.5	5.50781	8.4585	12.3369	15.4868	18.4478	20.1147	23.5781
69.6	5.4375	8.37256	12.168	15.29	18.2056	19.8623	23.2983
69.7	5.38916	8.28271	12.0391	15.1416	18.0078	19.6343	23.0522
69.8	5.34131	8.18652	11.8818	14.9648	17.7905	19.3965	22.7905
69.9	5.30469	8.09375	11.7759	14.79	17.5742	19.1812	22.5586
70	5.26025	8.01318	11.625	14.6289	17.3359	18.9521	22.2983
70.1	5.19922	7.90381	11.4766	14.4385	17.1445	18.7241	22.0483
70.2	5.15234	7.81543	11.3618	14.2656	16.9585	18.5083	21.7803
70.3	5.11572	7.729	11.2188	14.0986	16.7407	18.3022	21.5376
70.4	5.07178	7.64746	11.082	13.9336	16.5454	18.0864	21.3193
70.5	4.98828	7.53516	10.9282	13.7485	16.3555	17.8506	21.0405
70.6	4.92578	7.45459	10.8452	13.5688	16.1563	17.6538	20.8179
70.7	4.85693	7.35449	10.7163	13.3906	15.9468	17.4443	20.5771
70.8	4.82666	7.28271	10.604	13.2378	15.7876	17.2451	20.3359
70.9	4.78906	7.22656	10.4702	13.1001	15.625	17.0459	20.1055
71	4.74609	7.15381	10.3643	12.9399	15.4453	16.835	19.8491
71.1	4.67725	7.09668	10.2671	12.7671	15.2671	16.6426	19.5771
71.2	4.60645	7.01318	10.1563	12.5962	15.082	16.4609	19.3037
71.3	4.55615	6.92969	10.0352	12.4565	14.9023	16.2661	19.1421
71.4	4.5	6.85693	9.91797	12.311	14.7344	16.0835	18.9087
71.5	4.44922	6.78809	9.79834	12.1812	14.5562	15.895	18.71
71.6	4.40625	6.73193	9.68213	12.0376	14.4009	15.7334	18.5029
71.7	4.375	6.67334	9.55469	11.8979	14.2227	15.542	18.2749
71.8	4.33984	6.60156	9.4375	11.7813	14.0664	15.396	18.0767
71.9	4.2876	6.54443	9.33594	11.6196	13.8945	15.2256	17.8779
72	4.21875	6.47412	9.24072	11.4907	13.7344	15.0718	17.6563
72.1	4.16943	6.40527	9.13428	11.3579	13.582	14.9043	17.4287
72.2	4.13428	6.3125	9.03516	11.2407	13.4531	14.7334	17.2334
72.3	4.08691	6.24121	8.91406	11.1182	13.3032	14.5537	17.0444
72.4	4.03125	6.14063	8.81641	10.9907	13.1563	14.3608	16.8438
72.5	3.97266	6.05615	8.70703	10.8516	12.9883	14.1982	16.6577
72.6	3.93115	5.98584	8.60938	10.7212	12.8477	14.0537	16.478
72.7	3.88672	5.91309	8.51563	10.6196	12.7148	13.9106	16.3062
72.8	3.83838	5.81494	8.42822	10.4932	12.5664	13.7241	16.1211
72.9	3.80078	5.72705	8.33984	10.3789	12.4258	13.5537	15.938
73	3.75	5.65234	8.23828	10.2681	12.2969	13.4067	15.7539
73.1	3.71094	5.5874	8.146	10.1494	12.168	13.2632	15.5796
73.2	3.66797	5.52393	8.02734	10.0405	12.0366	13.0864	15.4287
73.3	3.62109	5.46094	7.91797	9.92041	11.8931	12.9312	15.2476
73.4	3.57959	5.36475	7.81641	9.80029	11.7266	12.7764	15.0664
73.5	3.51563	5.31396	7.71484	9.67188	11.5615	12.6255	14.8779
73.6	3.49072	5.23193	7.625	9.55713	11.4424	12.4727	14.7056
73.7	3.46777	5.19678	7.54443	9.45947	11.3179	12.3286	14.5396
73.8	3.42676	5.12891	7.42676	9.32129	11.186	12.1631	14.3672
73.9	3.38037	5.0874	7.32959	9.2085	11.0547	12.0146	14.2163
74	3.34619	5.0459	7.25391	9.12598	10.9233	11.8936	14.0796
74.1	3.30762	4.96387	7.15527	9.01807	10.7734	11.7583	13.9351
74.2	3.27441	4.92188	7.08545	8.93066	10.647	11.6147	13.7866
74.3	3.2373	4.86475	7.01855	8.82959	10.5234	11.5044	13.6279
74.4	3.20801	4.79443	6.94629	8.72998	10.3945	11.3921	13.4961
74.5	3.17969	4.76318	6.88037	8.63281	10.2969	11.2661	13.3843
74.6	3.1626	4.69287	6.80469	8.52979	10.1836	11.1523	13.2358
74.7	3.13965	4.65381	6.72412	8.44775	10.0757	11.0371	13.0977
74.8	3.09863	4.59619	6.64795	8.36279	9.96582	10.9141	12.9609
74.9	3.03271	4.54736	6.58887	8.2749	9.84668	10.8066	12.8208
75	3.01709	4.48193	6.50146	8.18604	9.73047	10.6929	12.6851
75.1	2.98926	4.42725	6.41895	8.06104	9.62744	10.5967	12.5391
75.2	2.95996	4.36475	6.35059	7.95947	9.53516	10.4756	12.3999
75.3	2.92676	4.30469	6.26416	7.86182	9.42578	10.3662	12.2788
75.4	2.89746	4.2373	6.20703	7.7876	9.31396	10.2529	12.1265
75.5	2.87744	4.20459	6.1499	7.7002	9.23682	10.1333	12.0015
75.6	2.85547	4.14453	6.09473	7.6377	9.13281	10	11.8647
75.7	2.82031	4.11475	6.02881	7.57178	9.03516	9.90527	11.7295
75.8	2.77881	4.05762	5.95703	7.46973	8.9375	9.78564	11.6172
75.9	2.76416	4.02344	5.89697	7.41016	8.84229	9.68115	11.5093
76	2.73828	3.9624	5.82959	7.32129	8.74609	9.57861	11.3906
76.1	2.7085	3.92627	5.76563	7.25928	8.63818	9.46387	11.2686
76.2	2.69385	3.86182	5.70703	7.18701	8.54297	9.32324	11.146
76.3	2.66016	3.82568	5.65381	7.13037	8.43359	9.19434	11.0288
76.4	2.61719	3.78125	5.59473	7.0542	8.33301	9.10059	10.8984
76.5	2.59229	3.74121	5.51953	6.99316	8.25146	9.00684	10.793
76.6	2.55859	3.68359	5.44678	6.91016	8.14697	8.92334	10.6982
76.7	2.51318	3.62012	5.38916	6.82275	8.04053	8.8374	10.582
76.8	2.49609	3.59521	5.34668	6.729	7.96484	8.76367	10.4834
76.9	2.47412	3.55518	5.29297	6.64844	7.86475	8.65137	10.3677
77	2.45801	3.51416	5.23291	6.5791	7.78516	8.56543	10.2656
77.1	2.43115	3.46777	5.17041	6.49219	7.69775	8.46631	10.168
77.2	2.41797	3.42334	5.12793	6.41797	7.61621	8.3833	10.0757
77.3	2.37891	3.38525	5.05322	6.33691	7.54395	8.30371	9.98584
77.4	2.34766	3.3584	4.98682	6.25098	7.46484	8.22412	9.88818
77.5	2.31641	3.33105	4.93506	6.16797	7.38281	8.14111	9.80615
77.6	2.29688	3.30469	4.88037	6.10156	7.32568	8.07471	9.72949
77.7	2.27734	3.2749	4.83691	6.05811	7.27441	7.99219	9.62744
77.8	2.25781	3.24609	4.77734	6	7.2085	7.89355	9.51855
77.9	2.23828	3.20215	4.70605	5.95703	7.14209	7.81543	9.43506
78	2.21484	3.15527	4.65479	5.8877	7.0625	7.73486	9.31543
78.1	2.20166	3.13525	4.62744	5.84863	6.99463	7.65625	9.23682
78.2	2.18506	3.10449	4.56641	5.77197	6.89453	7.56299	9.1499
78.3	2.15869	3.06787	4.52881	5.729	6.8374	7.4834	9.05762
78.4	2.12891	3.05225	4.49609	5.67188	6.77344	7.40674	8.95703
78.5	2.10059	3.03662	4.4375	5.62891	6.70703	7.32324	8.88721
78.6	2.08594	3.00684	4.3999	5.55957	6.63818	7.25439	8.79443
78.7	2.05566	2.96338	4.34229	5.5166	6.57129	7.16943	8.69385
78.8	2.04053	2.93652	4.26563	5.45313	6.49609	7.09277	8.62646
78.9	2.01709	2.88428	4.22656	5.39844	6.41406	7.02246	8.52783
79	1.98682	2.86621	4.18896	5.34082	6.35547	6.95215	8.44531
79.1	1.9751	2.83984	4.15332	5.28613	6.27344	6.89453	8.36475
79.2	1.94824	2.81396	4.09521	5.20703	6.19141	6.83398	8.25293
79.3	1.94531	2.78271	4.04834	5.15088	6.13818	6.77246	8.16797
79.4	1.90479	2.73438	3.99219	5.07813	6.06494	6.70459	8.08594
79.5	1.89697	2.7085	3.94629	5.03076	6.01416	6.65381	8.02881
79.6	1.85693	2.64355	3.896	4.96875	5.94287	6.56445	7.95605
79.7	1.81787	2.59375	3.86963	4.93066	5.896	6.51074	7.87891
79.8	1.83057	2.59668	3.84766	4.90088	5.85547	6.45459	7.8374
79.9	1.81787	2.55615	3.81934	4.84131	5.78271	6.40283	7.75049
80	1.79785	2.52344	3.76416	4.78857	5.73535	6.34131	7.67432
80.1	1.78125	2.4873	3.729	4.74072	5.67578	6.27783	7.62012
80.2	1.76855	2.49365	3.69678	4.70068	5.62402	6.21387	7.57568
80.3	1.74463	2.47266	3.66797	4.6792	5.58057	6.16162	7.51563
80.4	1.729	2.45068	3.62744	4.65088	5.53516	6.10596	7.44678
80.5	1.71631	2.45215	3.61475	4.59912	5.48193	6.05127	7.37646
80.6	1.6665	2.42188	3.56494	4.56982	5.41504	5.97266	7.29834
80.7	1.6709	2.39355	3.51855	4.51953	5.37256	5.92236	7.20605
80.8	1.63281	2.35547	3.47266	4.4375	5.30469	5.84521	7.10303
80.9	1.61963	2.33887	3.43604	4.40869	5.25635	5.79736	7.00781
81	1.62744	2.32031	3.40625	4.35889	5.22656	5.73975	6.95703
81.1	1.60303	2.28125	3.37891	4.30322	5.1875	5.66699	6.88037
81.2	1.5835	2.26611	3.33594	4.23828	5.12256	5.6123	6.80908
81.3	1.56641	2.24609	3.29932	4.17285	5.06885	5.52783	6.72803
81.4	1.53516	2.20996	3.26318	4.11719	5.03271	5.47949	6.65137
81.5	1.52734	2.17334	3.22803	4.0625	4.96631	5.40137	6.58594
81.6	1.52588	2.15381	3.19385	4.02441	4.92041	5.34277	6.53662
81.7	1.50244	2.13672	3.14844	3.95947	4.86719	5.27246	6.48047
81.8	1.5	2.11475	3.11963	3.92285	4.80469	5.21631	6.44678
81.9	1.47949	2.09277	3.0874	3.91162	4.74609	5.17383	6.40674
82	1.45557	2.06396	3.05469	3.85645	4.71338	5.11084	6.34375
82.1	1.41797	2.03516	3.00781	3.82129	4.6499	5.0249	6.26709
82.2	1.41016	2.00537	2.98682	3.79932	4.59375	4.96387	6.21631
82.3	1.39844	1.9834	2.96631	3.78906	4.54297	4.89355	6.16553
82.4	1.37891	1.94141	2.93604	3.74072	4.49463	4.86621	6.11719
82.5	1.37646	1.91553	2.89746	3.70947	4.44287	4.80127	6.06787
82.6	1.34375	1.89209	2.86328	3.67822	4.36475	4.72949	6.00684
82.7	1.34766	1.87793	2.83838	3.65234	4.34375	4.69678	5.9585
82.8	1.33838	1.84131	2.81641	3.61572	4.29541	4.65527	5.88428
82.9	1.32666	1.83203	2.77832	3.58936	4.27588	4.61475	5.82422
83	1.31006	1.81787	2.74756	3.57031	4.24609	4.55664	5.77637
83.1	1.27734	1.78271	2.71875	3.50879	4.17578	4.51074	5.70703
83.2	1.27881	1.76465	2.7085	3.50146	4.15918	4.4834	5.68018
83.3	1.24609	1.74365	2.66797	3.4541	4.11426	4.45215	5.61328
83.4	1.24854	1.74365	2.65625	3.42041	4.08594	4.4209	5.56396
83.5	1.22412	1.70459	2.61475	3.37744	4.03271	4.34277	5.48584
83.6	1.20703	1.67334	2.59375	3.3501	3.99365	4.33105	5.43506
83.7	1.19922	1.66553	2.56738	3.3291	3.95166	4.31006	5.375
83.8	1.17578	1.63428	2.53906	3.26953	3.91406	4.26465	5.31787
83.9	1.15625	1.61475	2.50928	3.24854	3.86328	4.21631	5.26709
84	1.146	1.59277	2.48584	3.20166	3.81641	4.19727	5.19971
84.1	1.10547	1.55469	2.44531	3.17822	3.76563	4.14355	5.13672
84.2	1.10645	1.5625	2.42676	3.14551	3.73291	4.11084	5.10547
84.3	1.08984	1.55078	2.41016	3.11328	3.68896	4.05762	5.02881
84.4	1.07568	1.53418	2.396	3.07422	3.63037	4.00049	4.96533
84.5	1.04688	1.50537	2.36719	3.03223	3.59619	3.94434	4.91553
84.6	1.0376	1.49512	2.33594	3.00635	3.5625	3.90381	4.87256
84.7	1.05078	1.48584	2.33984	2.99072	3.53662	3.89746	4.82813
84.8	1.03809	1.47412	2.32715	2.95703	3.50146	3.85352	4.81543
84.9	1.02344	1.45459	2.29297	2.93066	3.45166	3.81152	4.76318
85	1.02197	1.44922	2.27979	2.9165	3.42822	3.78125	4.72266
85.1	1	1.42871	2.26025	2.88916	3.375	3.74512	4.71631
85.2	0.988281	1.42334	2.24609	2.86963	3.36328	3.71387	4.69678
85.3	0.980469	1.41553	2.21875	2.8501	3.34766	3.66699	4.65771
85.4	0.96875	1.40381	2.19678	2.82129	3.30713	3.64502	4.61475
85.5	0.946777	1.39355	2.18506	2.80859	3.29443	3.60986	4.59668
85.6	0.925781	1.36084	2.14063	2.77979	3.24219	3.56934	4.54443
85.7	0.918945	1.35156	2.12598	2.75879	3.20703	3.53125	4.51807
85.8	0.917969	1.32178	2.10547	2.72266	3.18359	3.50293	4.47803
85.9	0.910156	1.31396	2.09766	2.70947	3.15625	3.47559	4.43896
86	0.911621	1.31396	2.08838	2.67822	3.14453	3.44434	4.41943
86.1	0.898438	1.30615	2.08203	2.65088	3.11963	3.40527	4.38184
86.2	0.886719	1.29443	2.05859	2.62207	3.09766	3.37549	4.34521
86.3	0.878906	1.28662	2.04053	2.61182	3.07813	3.34277	4.31787
86.4	0.867188	1.28662	2.04688	2.59229	3.06641	3.30371	4.28125
86.5	0.855469	1.26318	2.02344	2.56885	3.04688	3.27246	4.24756
86.6	0.845215	1.25293	2.00537	2.54688	3.01465	3.2334	4.20605
86.7	0.828125	1.23584	1.97119	2.52197	3.00391	3.21387	4.16943
86.8	0.824219	1.2124	1.95703	2.49854	2.97266	3.1709	4.12646
86.9	0.816406	1.20459	1.92969	2.47119	2.94531	3.13574	4.06934
87	0.804688	1.18115	1.90625	2.43994	2.91016	3.09277	4.04443
87.1	0.79541	1.17188	1.88525	2.41895	2.88379	3.06006	3.99219
87.2	0.791504	1.16797	1.87256	2.39453	2.87891	3.03418	3.96631
87.3	0.792969	1.16699	1.85938	2.37207	2.84766	3.00928	3.92725
87.4	0.789063	1.15625	1.83594	2.36182	2.81641	2.98486	3.91016
87.5	0.792969	1.15771	1.81104	2.34229	2.79688	2.93652	3.88037
87.6	0.769531	1.146	1.79688	2.33057	2.76563	2.90527	3.85059
87.7	0.769531	1.13818	1.78906	2.30322	2.74609	2.87402	3.82568
87.8	0.757813	1.12646	1.76563	2.27979	2.71484	2.84277	3.79688
87.9	0.763184	1.11865	1.75	2.27197	2.69922	2.81543	3.77881
88	0.765625	1.10693	1.72656	2.24072	2.67578	2.79199	3.73584
88.1	0.757813	1.09521	1.71875	2.23291	2.65625	2.77637	3.7085
88.2	0.75	1.0874	1.69922	2.21338	2.63672	2.75928	3.68359
88.3	0.73584	1.07324	1.67725	2.19922	2.61621	2.74268	3.65527
88.4	0.726563	1.05762	1.64844	2.17041	2.58594	2.70605	3.61865
88.5	0.729004	1.05225	1.625	2.13916	2.5625	2.6748	3.58887
88.6	0.730469	1.04443	1.60938	2.13135	2.53516	2.64893	3.56787
88.7	0.71875	1.01318	1.58594	2.1001	2.51563	2.62402	3.51709
88.8	0.71875	1.02344	1.57813	2.10156	2.49219	2.60449	3.50537
88.9	0.699219	0.993652	1.54688	2.08838	2.46484	2.57324	3.46875
89	0.695313	0.974121	1.52344	2.06348	2.42969	2.54199	3.45459
89.1	0.6875	0.966309	1.51563	2.04932	2.40234	2.52246	3.42725
89.2	0.679688	0.958496	1.5	2.0415	2.39453	2.50293	3.40137
89.3	0.667969	0.94043	1.48975	2.03125	2.36572	2.47412	3.38428
89.4	0.675781	0.931152	1.48438	2.0376	2.36328	2.47168	3.36475
89.5	0.65625	0.911621	1.47119	2.01807	2.33203	2.44434	3.3335
89.6	0.666504	0.902344	1.45703	2.00342	2.32275	2.42334	3.31641
89.7	0.649902	0.89209	1.44385	1.979	2.29688	2.38721	3.28662
89.8	0.65625	0.884277	1.42969	1.96338	2.28516	2.37402	3.26953
89.9	0.65625	0.884277	1.42969	1.95166	2.27734	2.35449	3.27881
90	0.648438	0.884277	1.41797	1.93359	2.24609	2.32324	3.24756
90.1	0.652344	0.87793	1.41162	1.92188	2.22803	2.29736	3.23096
90.2	0.654785	0.871094	1.40625	1.91357	2.21338	2.29053	3.19141
90.3	0.652344	0.856934	1.39844	1.89453	2.1875	2.26709	3.16943
90.4	0.640625	0.837402	1.38672	1.86963	2.15625	2.24658	3.14063
90.5	0.628906	0.825684	1.375	1.85791	2.13672	2.21631	3.12646
90.6	0.618652	0.81543	1.36475	1.83594	2.11475	2.20361	3.09668
90.7	0.605469	0.790527	1.33203	1.82666	2.08203	2.18262	3.07568
90.8	0.609375	0.782715	1.32666	1.81885	2.07422	2.16309	3.05615
90.9	0.597656	0.763184	1.31641	1.7876	2.05713	2.14355	3.03809
91	0.601563	0.765625	1.30859	1.77979	2.04688	2.12939	3.01709
91.1	0.600098	0.743652	1.29688	1.76807	2.02734	2.1123	2.99365
91.2	0.597656	0.724121	1.27734	1.75635	2.00781	2.09277	2.95313
91.3	0.601563	0.716309	1.25781	1.74854	1.98828	2.07324	2.94043
91.4	0.597656	0.706055	1.25781	1.73682	1.97803	2.0498	2.91553
91.5	0.589844	0.716309	1.24609	1.729	1.97656	2.04199	2.896
91.6	0.582031	0.70459	1.22656	1.70947	1.95703	2.01465	2.85693
91.7	0.578125	0.692871	1.21484	1.70557	1.93604	1.99365	2.84521
91.8	0.570313	0.685059	1.20703	1.69775	1.9375	1.9834	2.81396
91.9	0.566406	0.681152	1.19531	1.68604	1.91406	1.97168	2.79688
92	0.570313	0.685059	1.1875	1.67822	1.91943	1.95215	2.78662
92.1	0.5625	0.677246	1.18896	1.68066	1.91406	1.93652	2.76709
92.2	0.550781	0.665527	1.17578	1.67041	1.88672	1.9248	2.73975
92.3	0.553223	0.666504	1.16504	1.64941	1.87744	1.90771	2.71875
92.4	0.560059	0.674805	1.15771	1.64844	1.87646	1.90283	2.70605
92.5	0.539063	0.657715	1.13672	1.61963	1.83594	1.86621	2.66943
92.6	0.540527	0.665527	1.14844	1.61963	1.84375	1.86621	2.65771
92.7	0.539063	0.645996	1.12891	1.6001	1.81641	1.83496	2.63965
92.8	0.535156	0.64209	1.11719	1.58838	1.8125	1.82324	2.62256
92.9	0.539063	0.645996	1.10547	1.58301	1.79541	1.80371	2.60693
93	0.539063	0.638184	1.10938	1.59229	1.80859	1.7959	2.59521
93.1	0.539063	0.634277	1.0835	1.58057	1.79688	1.78564	2.57813
93.2	0.529785	0.614746	1.05469	1.57275	1.76563	1.77246	2.56543
93.3	0.539063	0.618652	1.05859	1.5625	1.76709	1.75293	2.53662
93.4	0.528809	0.604492	1.03271	1.54688	1.74365	1.73096	2.50293
93.5	0.515625	0.583496	1.01025	1.52588	1.73047	1.7124	2.48193
93.6	0.507813	0.571777	0.98584	1.49463	1.71094	1.70996	2.4624
93.7	0.510254	0.567871	0.998535	1.48926	1.70801	1.69678	2.44531
93.8	0.511719	0.563965	0.994629	1.49316	1.69531	1.68506	2.43506
93.9	0.505371	0.561523	0.974121	1.48828	1.68115	1.68164	2.4209
94	0.496094	0.550781	0.964844	1.47266	1.66406	1.6709	2.39209
94.1	0.493652	0.541992	0.95459	1.46338	1.65234	1.65918	2.37256
94.2	0.477539	0.550781	0.963379	1.46826	1.64307	1.6499	2.37109
94.3	0.470215	0.53418	0.946777	1.45313	1.61865	1.62549	2.34668
94.4	0.48584	0.544434	0.947754	1.45166	1.61719	1.62402	2.34521
94.5	0.464844	0.540527	0.953125	1.44922	1.61328	1.6123	2.32422
94.6	0.463379	0.519531	0.943848	1.43457	1.59229	1.59375	2.3125
94.7	0.460938	0.513184	0.929688	1.42041	1.57813	1.58496	2.28662
94.8	0.457031	0.513184	0.925781	1.4165	1.56787	1.57324	2.2749
94.9	0.445313	0.501465	0.917969	1.39697	1.5625	1.56689	2.25293
95	0.457031	0.507813	0.917969	1.38916	1.55469	1.56543	2.23584
95.1	0.449219	0.505371	0.898438	1.36963	1.53516	1.54199	2.21631
95.2	0.445313	0.505371	0.894531	1.35791	1.53125	1.53027	2.20459
95.3	0.449219	0.505371	0.888184	1.3501	1.52344	1.5249	2.19678
95.4	0.439941	0.497559	0.875	1.33057	1.50391	1.51465	2.17725
95.5	0.449219	0.495117	0.882813	1.31494	1.5	1.50293	2.17334
95.6	0.446777	0.501465	0.875	1.30957	1.49219	1.50293	2.15625
95.7	0.441406	0.505371	0.875	1.31104	1.48682	1.4873	2.15771
95.8	0.429688	0.493652	0.869629	1.30322	1.47656	1.47559	2.13818
95.9	0.425781	0.493652	0.867188	1.2915	1.47656	1.46387	2.12646
96	0.415527	0.479492	0.853027	1.27734	1.45996	1.44336	2.10449
96.1	0.40625	0.474121	0.847656	1.26025	1.43359	1.43262	2.0874
96.2	0.414063	0.470215	0.835938	1.24854	1.42188	1.42871	2.07568
96.3	0.416504	0.471191	0.834473	1.229	1.4126	1.41943	2.06641
96.4	0.398438	0.446777	0.816406	1.21729	1.39453	1.39355	2.02881
96.5	0.407715	0.445801	0.806152	1.19922	1.396	1.3833	2.01855
96.6	0.417969	0.462402	0.804688	1.20801	1.39063	1.38184	2.0249
96.7	0.417969	0.462402	0.808594	1.20947	1.38281	1.37402	2.00928
96.8	0.408691	0.45459	0.796875	1.18994	1.37744	1.35449	2
96.9	0.417969	0.453125	0.785156	1.17822	1.375	1.33887	1.99756
97	0.416504	0.441406	0.771973	1.16504	1.3501	1.32959	1.97656
97.1	0.398438	0.435059	0.757813	1.15332	1.33594	1.30371	1.95068
97.2	0.399902	0.427246	0.757813	1.15479	1.32813	1.30371	1.95215
97.3	0.402344	0.436523	0.759277	1.146	1.32568	1.29346	1.94824
97.4	0.40625	0.431152	0.753906	1.14697	1.3125	1.28027	1.93506
97.5	0.417969	0.435059	0.746094	1.13916	1.31641	1.2749	1.92725
97.6	0.410156	0.42334	0.734375	1.12744	1.30469	1.27246	1.90771
97.7	0.396973	0.414063	0.725098	1.11816	1.28369	1.25146	1.875
97.8	0.390625	0.403809	0.707031	1.1001	1.26563	1.24512	1.85693
97.9	0.390625	0.407715	0.707031	1.1001	1.26563	1.2334	1.84912
98	0.378906	0.395996	0.707031	1.08057	1.25781	1.22559	1.83984
98.1	0.378906	0.39209	0.709473	1.06885	1.25391	1.21387	1.8374
98.2	0.378906	0.386719	0.707031	1.05713	1.23438	1.20215	1.81787
98.3	0.378906	0.407715	0.699219	1.06104	1.23438	1.19434	1.79834
98.4	0.371094	0.395996	0.677246	1.0415	1.22656	1.17725	1.77881
98.5	0.390625	0.407715	0.6875	1.04932	1.23438	1.20605	1.77881
98.6	0.378906	0.407715	0.667969	1.0376	1.21484	1.18652	1.75928
98.7	0.371094	0.393555	0.65625	1.01807	1.20703	1.16699	1.74756
98.8	0.371094	0.390625	0.660156	1.02197	1.20703	1.16699	1.73975
98.9	0.376465	0.395996	0.65625	1.02051	1.20068	1.15527	1.73975
99	0.359375	0.376465	0.648438	1.01025	1.17188	1.14746	1.71631
99.1	0.359375	0.376465	0.648438	1.01172	1.17578	1.13574	1.7085
99.2	0.359375	0.368652	0.636719	0.990723	1.16406	1.11621	1.70068
99.3	0.359375	0.356934	0.628906	0.971191	1.14307	1.1084	1.68115
99.4	0.347656	0.349121	0.617188	0.959473	1.11719	1.09668	1.66162
99.5	0.339844	0.337402	0.611816	0.950195	1.10547	1.07715	1.63818
99.6	0.335938	0.345215	0.614746	0.939941	1.10547	1.07324	1.63818
99.7	0.339844	0.349121	0.611816	0.943848	1.09766	1.07715	1.63037
99.8	0.328125	0.337402	0.609375	0.932129	1.08594	1.06543	1.61084
99.9	0.308594	0.325684	0.609375	0.917969	1.07813	1.05518	1.59912
100	0.316406	0.327148	0.605469	0.896973	1.07422	1.04443	1.59521
100.1	0.304688	0.333496	0.597656	0.88916	1.06641	1.0459	1.57568
100.2	0.310059	0.334961	0.61084	0.899902	1.06787	1.04492	1.58105
100.3	0.304688	0.332031	0.595215	0.887695	1.0625	1.03418	1.56787
100.4	0.311035	0.327148	0.597656	0.900879	1.05469	1.02246	1.56787
100.5	0.320313	0.325684	0.585938	0.900879	1.04688	1.01465	1.54834
100.6	0.314941	0.332031	0.584473	0.895508	1.03369	1.00928	1.53271
100.7	0.310059	0.31543	0.567871	0.882813	1.01465	0.996582	1.50684
100.8	0.307129	0.300781	0.553223	0.875977	0.998535	0.989746	1.49463
100.9	0.300781	0.294434	0.558594	0.869629	0.994629	0.975586	1.50146
101	0.292969	0.285156	0.539063	0.861816	0.96875	0.967773	1.48975
101.1	0.280273	0.280273	0.540527	0.851563	0.958496	0.95752	1.47168
101.2	0.26416	0.274902	0.543945	0.856445	0.971191	0.958496	1.46631
101.3	0.269531	0.274902	0.54834	0.861816	0.96875	0.944336	1.46631
101.4	0.259277	0.274902	0.540527	0.851563	0.958496	0.935547	1.45996
101.5	0.257813	0.26709	0.535156	0.850098	0.945313	0.920898	1.44678
101.6	0.253906	0.263184	0.535156	0.846191	0.941406	0.920898	1.44287
101.7	0.260254	0.26709	0.535156	0.85791	0.945313	0.920898	1.44287
101.8	0.255371	0.255371	0.527344	0.850098	0.933594	0.901367	1.43506
101.9	0.257813	0.255371	0.527344	0.847656	0.9375	0.901367	1.43506
102	0.257813	0.255371	0.523438	0.82666	0.925781	0.901367	1.43506
102.1	0.246094	0.243652	0.515625	0.82666	0.914063	0.889648	1.42334
102.2	0.246094	0.255371	0.515625	0.82666	0.917969	0.895996	1.42725
102.3	0.256348	0.259277	0.518066	0.829102	0.916504	0.903809	1.42822
102.4	0.257813	0.263184	0.515625	0.82666	0.925781	0.913086	1.43652
102.5	0.257813	0.26709	0.519531	0.830566	0.917969	0.905273	1.42725
102.6	0.257813	0.26709	0.507813	0.817383	0.90625	0.893555	1.40771
102.7	0.246094	0.263184	0.503906	0.818848	0.90625	0.893555	1.40625
102.8	0.246094	0.243652	0.496094	0.799316	0.89209	0.881836	1.40771
102.9	0.248535	0.255371	0.498535	0.811035	0.88916	0.874023	1.3999
103	0.230469	0.23584	0.5	0.796875	0.895996	0.866211	1.38818
103.1	0.228027	0.243652	0.496094	0.787598	0.882813	0.862305	1.37646
103.2	0.244629	0.243652	0.505371	0.787598	0.877441	0.866211	1.37646
103.3	0.230469	0.23584	0.488281	0.787598	0.872559	0.854492	1.36865
103.4	0.230469	0.247559	0.488281	0.791504	0.869629	0.868652	1.36621
103.5	0.230469	0.243652	0.488281	0.786133	0.875	0.866211	1.35693
103.6	0.228027	0.233398	0.476563	0.777344	0.870117	0.849609	1.34277
103.7	0.209473	0.226563	0.479004	0.762695	0.846191	0.835938	1.32813
103.8	0.222656	0.23584	0.48584	0.771973	0.855469	0.858398	1.3374
103.9	0.216309	0.231934	0.476563	0.777344	0.855469	0.854492	1.3335
104	0.20166	0.234375	0.464844	0.748535	0.84375	0.834961	1.32568
104.1	0.210938	0.247559	0.46875	0.760254	0.84375	0.84668	1.31787
104.2	0.199219	0.247559	0.46875	0.740723	0.835938	0.834961	1.31787
104.3	0.199219	0.255371	0.464844	0.748535	0.84375	0.834961	1.31641
104.4	0.196777	0.243652	0.464844	0.736816	0.832031	0.820801	1.31543
104.5	0.1875	0.255371	0.46875	0.740723	0.835938	0.81543	1.30859
104.6	0.195313	0.255371	0.464844	0.736816	0.830566	0.811523	1.31543
104.7	0.199219	0.26709	0.471191	0.74707	0.835938	0.81543	1.30859
104.8	0.199219	0.255371	0.466309	0.73291	0.828125	0.803711	1.30615
104.9	0.1875	0.255371	0.445313	0.721191	0.816406	0.795898	1.2959
105	0.188965	0.249023	0.438965	0.710938	0.79834	0.785645	1.27881
105.1	0.199219	0.255371	0.457031	0.729004	0.816406	0.791992	1.29834
105.2	0.1875	0.245117	0.447754	0.721191	0.796875	0.78418	1.28418
105.3	0.195313	0.231934	0.462402	0.717285	0.804688	0.772461	1.2749
105.4	0.1875	0.231934	0.453125	0.710938	0.792969	0.758301	1.26318
105.5	0.1875	0.231934	0.457031	0.71582	0.804688	0.760742	1.26709
105.6	0.189941	0.234375	0.459473	0.711914	0.799316	0.755371	1.25781
105.7	0.1875	0.23584	0.457031	0.713379	0.794434	0.75293	1.25781
105.8	0.1875	0.243652	0.464844	0.707031	0.785156	0.75293	1.26709
105.9	0.175781	0.243652	0.464844	0.686035	0.773438	0.741211	1.25293
106	0.1875	0.255371	0.476563	0.689941	0.773438	0.751465	1.25537
106.1	0.185059	0.243652	0.46875	0.689941	0.765625	0.733398	1.24756
106.2	0.183594	0.243652	0.476563	0.686035	0.773438	0.733398	1.24365
106.3	0.175781	0.243652	0.464844	0.678223	0.761719	0.72168	1.23438
106.4	0.175781	0.255371	0.476563	0.678223	0.765625	0.725586	1.22803
106.5	0.174316	0.255371	0.474121	0.678223	0.765625	0.713867	1.21631
106.6	0.160156	0.243652	0.453125	0.658691	0.753906	0.713867	1.2085
106.7	0.148438	0.243652	0.443848	0.657227	0.746094	0.706055	1.18896
106.8	0.148438	0.23584	0.4375	0.643066	0.734375	0.694336	1.17725
106.9	0.148438	0.23584	0.4375	0.654785	0.744629	0.694336	1.17871
107	0.128906	0.23584	0.4375	0.643066	0.738281	0.686523	1.15771
107.1	0.131348	0.226563	0.432129	0.645508	0.721191	0.674805	1.16016
107.2	0.132813	0.23584	0.441406	0.643066	0.716309	0.669434	1.16162
107.3	0.121094	0.228027	0.429688	0.632813	0.699219	0.666992	1.14844
107.4	0.11084	0.228027	0.429688	0.623535	0.699219	0.666992	1.13184
107.5	0.0898438	0.228027	0.429688	0.623535	0.6875	0.65918	1.13037
107.6	0.0991211	0.224121	0.436523	0.621094	0.696777	0.654297	1.13818
107.7	0.0976563	0.217773	0.428223	0.619629	0.695313	0.651367	1.12793
107.8	0.0976563	0.224121	0.4375	0.619629	0.683594	0.645996	1.12646
107.9	0.0976563	0.23584	0.446777	0.628906	0.6875	0.652832	1.12646
108	0.0976563	0.224121	0.425781	0.60791	0.675781	0.643555	1.125
108.1	0.09375	0.230469	0.433594	0.615723	0.683594	0.631836	1.11865
108.2	0.0859375	0.224121	0.433594	0.614258	0.664063	0.631836	1.11865
108.3	0.0883789	0.21875	0.43457	0.602539	0.664063	0.613281	1.10938
108.4	0.0844727	0.228027	0.4375	0.600098	0.664063	0.616211	1.1084
108.5	0.078125	0.213867	0.429688	0.600098	0.644531	0.604492	1.0874
108.6	0.0703125	0.196777	0.415527	0.600098	0.632813	0.602051	1.0874
108.7	0.0703125	0.196777	0.40625	0.600098	0.631348	0.573242	1.06543
108.8	0.0717773	0.198242	0.407715	0.59375	0.618652	0.574707	1.0459
108.9	0.0678711	0.192871	0.402344	0.600098	0.613281	0.573242	1.05225
109	0.0844727	0.20459	0.404785	0.611816	0.617188	0.573242	1.04443
109.1	0.078125	0.192871	0.398438	0.600098	0.605469	0.561523	1.03662
109.2	0.0703125	0.182617	0.384277	0.600098	0.591309	0.552246	1.02344
109.3	0.0727539	0.175781	0.369629	0.59082	0.57666	0.536621	1.01953
109.4	0.0703125	0.17334	0.378906	0.600098	0.574219	0.538086	1.00928
109.5	0.0756836	0.17334	0.375	0.600098	0.582031	0.53418	1.01709
109.6	0.0664063	0.17334	0.373535	0.600098	0.57666	0.526367	0.997559
109.7	0.0600586	0.17334	0.362305	0.589844	0.584961	0.513672	0.987305
109.8	0.078125	0.17334	0.385254	0.60791	0.582031	0.510742	1.00537
109.9	0.0805664	0.167969	0.381348	0.610352	0.57666	0.505371	0.997559
110	0.078125	0.165527	0.378906	0.619629	0.584473	0.514648	0.98584
110.1	0.0859375	0.17334	0.384277	0.627441	0.574219	0.510742	0.974121
110.2	0.0742188	0.170898	0.367188	0.619629	0.574219	0.50293	0.974121
110.3	0.0874023	0.166992	0.368652	0.632813	0.57959	0.516113	0.975586
110.4	0.0844727	0.160156	0.373535	0.625977	0.572754	0.509277	0.972656
110.5	0.0805664	0.153809	0.355469	0.619629	0.566406	0.495117	0.966309
110.6	0.103027	0.166992	0.36084	0.632813	0.569336	0.496582	0.966309
110.7	0.0961914	0.152344	0.354004	0.629883	0.572754	0.501465	0.957031
110.8	0.0898438	0.145996	0.347656	0.623535	0.566406	0.487305	0.938965
110.9	0.0976563	0.14209	0.347656	0.619629	0.574219	0.483398	0.946777
111	0.0898438	0.134277	0.338379	0.619629	0.5625	0.47168	0.938965
111.1	0.0898438	0.134277	0.347656	0.619629	0.557129	0.463867	0.924805
111.2	0.078125	0.122559	0.328125	0.617188	0.554688	0.463867	0.907715
111.3	0.078125	0.117188	0.328125	0.596191	0.554688	0.461426	0.895996
111.4	0.0898438	0.126465	0.328125	0.600098	0.558594	0.463867	0.907715
111.5	0.0820313	0.126465	0.320313	0.600098	0.546875	0.452148	0.895996
111.6	0.078125	0.122559	0.328125	0.60791	0.554688	0.452148	0.903809
111.7	0.078125	0.122559	0.328125	0.60791	0.546875	0.452148	0.894531
111.8	0.0664063	0.114746	0.316406	0.606445	0.535156	0.44043	0.876465
111.9	0.0664063	0.103027	0.308594	0.589844	0.535156	0.44043	0.868652
112	0.0756836	0.106934	0.321777	0.598633	0.535156	0.444336	0.880371
112.1	0.0600586	0.105957	0.317871	0.59375	0.528809	0.445801	0.870117
112.2	0.0664063	0.0913086	0.324219	0.600098	0.536621	0.442871	0.87793
112.3	0.0664063	0.09375	0.324219	0.588379	0.53125	0.444336	0.876465
112.4	0.0742188	0.11084	0.332031	0.596191	0.539063	0.44043	0.872559
112.5	0.0859375	0.112305	0.335938	0.600098	0.53125	0.44043	0.871094
112.6	0.09375	0.0991211	0.34375	0.596191	0.539063	0.44043	0.872559
112.7	0.0961914	0.101563	0.334473	0.59082	0.533691	0.431152	0.867188
112.8	0.105469	0.103027	0.335938	0.588379	0.53125	0.442871	0.866211
112.9	0.105469	0.103027	0.335938	0.588379	0.533691	0.444336	0.863281
113	0.117188	0.103027	0.335938	0.600098	0.542969	0.444336	0.856934
113.1	0.117188	0.105469	0.347656	0.609375	0.554688	0.448242	0.868652
113.2	0.109375	0.112305	0.347656	0.588379	0.554688	0.445801	0.86084
113.3	0.117188	0.103027	0.34375	0.588379	0.554688	0.432617	0.868652
113.4	0.117188	0.105469	0.335938	0.588379	0.542969	0.432617	0.856934
113.5	0.117188	0.103027	0.335938	0.57666	0.542969	0.432617	0.856934
113.6	0.114746	0.104492	0.333496	0.578125	0.552246	0.430176	0.858398
113.7	0.10791	0.0976563	0.318848	0.571289	0.54541	0.42334	0.849121
113.8	0.106934	0.0927734	0.325684	0.578125	0.544434	0.422363	0.834961
113.9	0.104004	0.0913086	0.324219	0.564941	0.542969	0.420898	0.833496
114	0.100098	0.0976563	0.338379	0.579102	0.557129	0.42334	0.835938
114.1	0.109375	0.0952148	0.338379	0.568848	0.566406	0.424805	0.839844
114.2	0.109375	0.103027	0.355469	0.57666	0.574219	0.432617	0.856934
114.3	0.106934	0.103027	0.347656	0.568848	0.5625	0.432617	0.856934
114.4	0.0976563	0.106934	0.359375	0.568848	0.574219	0.444336	0.856934
114.5	0.0976563	0.0952148	0.347656	0.568848	0.566406	0.435059	0.856934
114.6	0.0952148	0.0927734	0.34668	0.566406	0.563965	0.441895	0.84668
114.7	0.0742188	0.0717773	0.335938	0.54541	0.542969	0.424805	0.837402
114.8	0.078125	0.0756836	0.335938	0.557129	0.554688	0.436523	0.849121
114.9	0.0883789	0.0859375	0.346191	0.55957	0.554688	0.435059	0.847656
115	0.0976563	0.106934	0.365723	0.579102	0.568848	0.456055	0.868652
115.1	0.0976563	0.0952148	0.349121	0.572754	0.575684	0.456055	0.868652
115.2	0.103027	0.0927734	0.353027	0.566406	0.560059	0.453613	0.874023
115.3	0.0976563	0.0952148	0.355469	0.566406	0.5625	0.444336	0.868652
115.4	0.0976563	0.0834961	0.355469	0.557129	0.549316	0.444336	0.854492
115.5	0.0976563	0.0834961	0.355469	0.549316	0.542969	0.444336	0.845215
115.6	0.0844727	0.0795898	0.342285	0.536133	0.533691	0.442871	0.84375
115.7	0.0874023	0.0654297	0.345215	0.539063	0.536621	0.434082	0.827148
115.8	0.0976563	0.0717773	0.363281	0.557129	0.542969	0.452148	0.845215
115.9	0.0976563	0.0742188	0.363281	0.557129	0.542969	0.452148	0.845215
116	0.0922852	0.0898438	0.369629	0.555664	0.539063	0.450684	0.839844
116.1	0.0976563	0.0927734	0.375	0.561035	0.537598	0.45752	0.837402
116.2	0.0883789	0.0742188	0.367188	0.547852	0.532715	0.450684	0.837402
116.3	0.0952148	0.0966797	0.380371	0.554688	0.536621	0.449707	0.837402
116.4	0.0898438	0.103027	0.373535	0.561035	0.542969	0.456055	0.837402
116.5	0.100098	0.105469	0.378906	0.571289	0.54541	0.463867	0.839844
116.6	0.106934	0.109863	0.390625	0.566406	0.550781	0.449707	0.84668
116.7	0.0976563	0.0913086	0.378906	0.561035	0.546875	0.444336	0.837402
116.8	0.100098	0.09375	0.381348	0.563477	0.537598	0.446777	0.839844
116.9	0.117188	0.103027	0.384277	0.578125	0.554688	0.452148	0.856934
117	0.117188	0.103027	0.375	0.568848	0.552246	0.444336	0.849121
117.1	0.121094	0.114746	0.386719	0.580566	0.554688	0.444336	0.849121
117.2	0.121094	0.105469	0.375	0.568848	0.554688	0.444336	0.849121
117.3	0.121094	0.114746	0.375	0.561035	0.546875	0.444336	0.849121
117.4	0.117188	0.120117	0.375	0.568848	0.554688	0.44043	0.845215
117.5	0.117188	0.103027	0.375	0.568848	0.542969	0.44043	0.834961
117.6	0.128906	0.114746	0.375	0.568848	0.554688	0.452148	0.837402
117.7	0.128906	0.103027	0.373535	0.566406	0.553223	0.452148	0.837402
117.8	0.128906	0.103027	0.359375	0.557129	0.546875	0.452148	0.837402
117.9	0.128906	0.11084	0.367188	0.564941	0.542969	0.449707	0.833496
118	0.128906	0.113281	0.378906	0.57666	0.554688	0.45459	0.845215
118.1	0.117188	0.0952148	0.355469	0.557129	0.535156	0.449707	0.833496
118.2	0.117188	0.0966797	0.355469	0.557129	0.532715	0.427246	0.825684
118.3	0.121094	0.103027	0.367188	0.568848	0.523438	0.432617	0.837402
118.4	0.109375	0.101563	0.367188	0.557129	0.520996	0.432617	0.837402
118.5	0.109375	0.0952148	0.359375	0.555664	0.503906	0.424805	0.825684
118.6	0.0976563	0.0952148	0.347656	0.549316	0.492188	0.424805	0.825684
118.7	0.109375	0.106934	0.359375	0.5625	0.503906	0.422363	0.82959
118.8	0.117188	0.103027	0.367188	0.568848	0.502441	0.420898	0.834961
118.9	0.109375	0.0952148	0.359375	0.557129	0.484375	0.413086	0.813965
119	0.109375	0.0952148	0.359375	0.557129	0.484375	0.401367	0.813965
119.1	0.106934	0.0810547	0.342773	0.554688	0.470215	0.398926	0.803711
119.2	0.0834961	0.0639648	0.324219	0.536133	0.453125	0.389648	0.794434
119.3	0.0766602	0.0639648	0.32666	0.543945	0.455566	0.39209	0.785156
119.4	0.0898438	0.0756836	0.335938	0.541504	0.474121	0.401367	0.792969
119.5	0.0898438	0.0639648	0.328125	0.541504	0.45166	0.393555	0.786621
119.6	0.0922852	0.0639648	0.328125	0.541504	0.4375	0.39209	0.778809
119.7	0.101563	0.0639648	0.325684	0.541504	0.425781	0.385742	0.776367
119.8	0.0898438	0.0561523	0.307129	0.529785	0.425781	0.385742	0.755371
119.9	0.0976563	0.0639648	0.321777	0.537598	0.433594	0.381836	0.753906
120	0.101563	0.0639648	0.316406	0.546875	0.435059	0.393555	0.759277
120.1	0.0991211	0.0615234	0.313965	0.527344	0.42334	0.380859	0.745117
120.2	0.0898438	0.0444336	0.304688	0.518066	0.402344	0.350586	0.73584
120.3	0.0991211	0.0405273	0.299316	0.525879	0.410156	0.356934	0.73584
120.4	0.0947266	0.0429688	0.29541	0.519043	0.407227	0.34668	0.726563
120.5	0.0888672	0.0405273	0.294434	0.535156	0.411621	0.34668	0.733398
120.6	0.0727539	0.03125	0.283691	0.51416	0.400879	0.327148	0.703125
120.7	0.0795898	0.0380859	0.290527	0.511719	0.395996	0.316895	0.709961
120.8	0.0859375	0.0327148	0.285156	0.516602	0.402344	0.327148	0.716309
120.9	0.0742188	0.0302734	0.285156	0.498535	0.39209	0.331055	0.70459
121	0.0844727	0.03125	0.287598	0.508789	0.393066	0.341309	0.707031
121.1	0.0766602	0.0249023	0.289063	0.510254	0.394531	0.331055	0.694336
121.2	0.0678711	0.0234375	0.290527	0.503906	0.394531	0.325684	0.6875
121.3	0.0419922	0.00439453	0.285156	0.498535	0.384277	0.336426	0.686523
121.4	0.0297852	0.0131836	0.296875	0.511719	0.400879	0.352051	0.677246
121.5	0.0117188	0.0117188	0.291504	0.522949	0.393066	0.332031	0.677246
121.6	-0.0102539	0.00537109	0.285156	0.510254	0.388184	0.293457	0.639648
121.7	-0.00292969	-0.00634766	0.320313	0.563477	0.385254	0.288086	0.636719
121.8	-0.0102539	-0.00488281	0.324219	0.585938	0.388184	0.291992	0.645996
121.9	0.0102539	0.0102539	0.332031	0.618164	0.400879	0.306152	0.644531
122	0.0131836	0.0366211	0.3125	0.597656	0.425781	0.305176	0.669434
122.1	0.0195313	0.0380859	0.286621	0.585938	0.431152	0.293457	0.656738
122.2	0.0180664	0.0507813	0.274414	0.580078	0.454102	0.282715	0.654785
122.3	0.0249023	0.0263672	0.274902	0.583496	0.44043	0.285645	0.643555
122.4	0.0102539	-0.00878906	0.257813	0.546875	0.424316	0.263184	0.634277
122.5	0.0375977	-0.00390625	0.265625	0.536133	0.433594	0.273926	0.640625
122.6	0.0625	0.00390625	0.234375	0.525879	0.433594	0.26709	0.640625
122.7	0.0561523	-0.00878906	0.222656	0.502441	0.432129	0.266113	0.647461
122.8	0.0507813	-0.0180664	0.194336	0.464844	0.424805	0.241211	0.62793
122.9	0.0664063	-0.00878906	0.193848	0.445313	0.433594	0.241211	0.632813
123	0.0678711	-0.0258789	0.188965	0.477539	0.433594	0.246582	0.620117
123.1	0.0766602	-0.0258789	0.214844	0.518066	0.432129	0.277344	0.616211
123.2	0.0585938	-0.0234375	0.248535	0.518066	0.42334	0.297363	0.606934
123.3	0.0585938	-0.0219727	0.248535	0.519043	0.416504	0.302246	0.59375
123.4	0.0546875	-0.0180664	0.256348	0.524902	0.432129	0.290527	0.59375
123.5	0.0390625	-0.0463867	0.249023	0.494629	0.414551	0.281738	0.566895
123.6	0.0234375	-0.0522461	0.244629	0.473633	0.399414	0.268555	0.561035
123.7	0.0219727	-0.0507813	0.242188	0.464844	0.394531	0.260742	0.553711
123.8	0.0288086	-0.0439453	0.253906	0.467285	0.364746	0.234863	0.544434
123.9	0.0288086	-0.0439453	0.257813	0.459473	0.363281	0.230957	0.536621
124	0.0322266	-0.0327148	0.25	0.45166	0.367188	0.212402	0.528809
124.1	0.0405273	-0.0141602	0.269531	0.467285	0.385254	0.226563	0.546875
124.2	0.0444336	-0.0151367	0.285156	0.464844	0.389648	0.236328	0.547363
124.3	0.0361328	-0.0273438	0.287598	0.446289	0.366699	0.231934	0.542969
124.4	0.0405273	-0.00634766	0.310059	0.449219	0.389648	0.237305	0.540527
124.5	0.046875	-0.0141602	0.306152	0.436035	0.386719	0.227051	0.553711
124.6	0.0507813	-0.0102539	0.301758	0.411133	0.375	0.23584	0.549316
124.7	0.0664063	-0.00390625	0.308594	0.422852	0.377441	0.247559	0.563965
124.8	0.0639648	0.00292969	0.313965	0.435059	0.389648	0.251953	0.58252
124.9	0.0595703	-0.00244141	0.300781	0.411133	0.359375	0.241211	0.557129
125	0.0742188	0.0249023	0.324219	0.417969	0.369629	0.251465	0.577148
125.1	0.0600586	0.0390625	0.306152	0.42041	0.375	0.256836	0.567871
125.2	0.0795898	0.0629883	0.324219	0.447754	0.394531	0.271484	0.59668
125.3	0.0727539	0.0625	0.32666	0.447754	0.398438	0.273438	0.596191
125.4	0.078125	0.0820313	0.346191	0.447754	0.428223	0.303711	0.624023
125.5	0.0727539	0.078125	0.341309	0.42041	0.439941	0.307617	0.619629
125.6	0.0756836	0.0849609	0.34375	0.418945	0.435059	0.313965	0.630371
125.7	0.0522461	0.0756836	0.316406	0.410156	0.429688	0.31543	0.629395
125.8	0.0571289	0.0795898	0.314941	0.400879	0.436035	0.334961	0.627441
125.9	0.0366211	0.0771484	0.297363	0.394531	0.42627	0.326172	0.61377
126	0.03125	0.0522461	0.291504	0.425293	0.42041	0.29834	0.591309
126.1	0.0400391	0.111816	0.311035	0.459473	0.442383	0.32959	0.604004
126.2	0.0131836	0.0981445	0.294434	0.438965	0.432617	0.352051	0.590332
126.3	-0.0322266	0.0483398	0.28125	0.364258	0.410156	0.302246	0.540527
126.4	-0.123535	0.0341797	0.26709	0.393066	0.38916	0.287109	0.526367
126.5	-0.125	0.0546875	0.283691	0.411133	0.429688	0.308594	0.528809
126.6	-0.158691	0.0600586	0.283691	0.417969	0.441406	0.327148	0.465332
126.7	-0.206055	0.0454102	0.277344	0.426758	0.438477	0.345215	0.322754
126.8	-0.206543	0.0341797	0.26709	0.438965	0.480957	0.344238	0.371582
126.9	-0.331543	0.00830078	0.224121	0.378906	0.431152	0.410645	0.396484
127	-0.188965	0.0200195	0.11084	0.356934	0.285156	0.635742	0.769531
127.1	-0.129395	0.0771484	-0.182129	0.422852	-0.112305	0.268066	0.498535
127.2	0.0874023	0.0444336	0.319336	0.489258	0.0830078	0.373047	0.6875
127.3	0.150879	0.166504	0.337891	0.669922	0.592285	0.35791	0.743164
127.4	0.173828	0.230957	0.432617	0.749023	0.547363	0.666992	0.794922
127.5	0.1875	0.114746	0.14502	0.585938	0.223145	1.16602	1.44824
127.6	0.148438	0.312988	-0.395996	0.73291	-0.470215	0.491211	0.962402
127.7	0.177246	1.17432	0.939941	1.48438	0.442383	0.70752	0.606934
127.8	0.197754	0.0532227	0.657715	0.562012	1.1792	0.394531	0.639648
127.9	0.221191	0.078125	0.271973	0.558594	0.59082	0.407715	0.599121
128	0.208496	-0.123535	0.251465	0.464844	0.386719	0.388672	0.54834
128.1	0.206055	-0.0375977	0.216309	0.480469	0.491211	0.402832	0.57959
128.2	0.166504	-0.078125	0.17041	0.438477	0.350098	0.378906	0.546875
128.3	0.152344	-0.0791016	0.163086	0.410156	0.316406	0.345703	0.581055
128.4	0.151855	-0.0742188	0.116699	0.369141	0.331543	0.352539	0.48291
128.5	0.210938	0.172852	0.189941	0.645508	0.555664	0.355469	0.778809
128.6	-0.492188	-0.265625	-0.201172	0.34082	0.245605	-0.424316	1.27295
128.7	-0.28125	-0.0332031	-0.755371	-0.825684	-1.15771	0.124512	0.658203
128.8	0.0175781	0.0405273	-1.33984	0.412598	0.177734	0.21582	0.668945
128.9	-0.0498047	0.0170898	-0.0771484	0.325684	0.178223	0.101563	0.578125
129	0.158691	0.0898438	0.178711	0.310059	0.320801	0.27002	0.645996
129.1	0.161621	0.0380859	0.299805	0.459473	0.380371	0.26709	0.635742
129.2	0.128906	0.0522461	0.26709	0.492188	0.411621	0.307617	0.638184
129.3	0.152344	0.0844727	0.266602	0.503418	0.401855	0.302246	0.631348
129.4	0.171875	0.0888672	0.302246	0.542969	0.427246	0.305176	0.663086
129.5	0.169434	0.090332	0.32666	0.541504	0.445313	0.305176	0.677246
129.6	0.164063	0.078125	0.353027	0.564941	0.446777	0.276367	0.663086
129.7	0.196289	0.0859375	0.369629	0.553223	0.45166	0.274902	0.666504
129.8	0.239746	0.105957	0.371094	0.584473	0.478027	0.277832	0.69043
129.9	0.236816	0.0664063	0.385254	0.583008	0.458008	0.270996	0.677246
130	0.217773	0.000488281	0.366211	0.540527	0.418457	0.233887	0.666992
130.1	0.176758	-0.0546875	0.339844	0.502441	0.372559	0.185059	0.790527
130.2	0.0810547	0.0234375	0.14502	0.286621	0.203613	0.26123	1.36914
130.3	-0.563477	0.0449219	-0.67041	-0.285156	-0.205566	0.452148	0.612793
130.4	0.425293	0.123535	-0.078125	0.874512	1.07031	0.911133	0.0532227
130.5	0.942383	0.0405273	1.28125	1.64697	2.15723	0.291504	0.349121
130.6	0.644531	0.271484	1.14355	1.08105	0.841797	0.348145	0.608398
130.7	0.147949	-0.0234375	0.463379	0.476563	0.393066	-0.034668	0.475098
130.8	-0.199707	-0.143555	0.0893555	0.193359	-0.0200195	0.043457	0.347656
130.9	0.0615234	0.0405273	0.293457	0.497559	0.249023	0.121582	0.328125
131	-0.91748	0.00195313	-0.708008	-0.497559	-0.734375	-1.16455	0.460449
131.1	-1.41162	-0.178711	-0.911621	-0.966797	-1.05371	-0.0249023	0.382813
131.2	-0.12793	-0.0893555	0.09375	0.26416	0.331055	0.153809	0.420898
131.3	0.150879	-0.0742188	0.176758	0.366699	0.349121	0.228027	0.462402
131.4	0.0678711	-0.046875	0.243652	0.426758	0.493652	0.209961	0.498535
131.5	0.0131836	-0.0244141	0.25	0.488281	0.427246	0.215332	0.545898
131.6	-0.0483398	-0.10791	0.254883	0.469727	0.342285	0.222656	0.557129
131.7	-0.0737305	-0.119629	0.25293	0.462402	0.33252	0.208984	0.555176
131.8	-0.302246	-0.190918	0.0571289	0.287598	0.0961914	-0.034668	0.410645
131.9	-0.748535	-0.212891	-0.358887	-0.194336	-0.256348	-0.410645	0.464844
132	-1.07666	0.230957	-0.816406	-0.516113	-0.700684	-0.425293	0.803711
132.1	-0.893066	-0.277344	-0.684082	-0.529297	-0.765625	0.157715	0.372559
132.2	0.0717773	-0.162598	0.275879	0.436035	0.287598	0.302246	0.395996
132.3	-0.00292969	-0.144531	0.32959	0.473633	0.346191	0.302246	0.467285
132.4	0.0366211	-0.101563	0.332031	0.506348	0.371094	0.291016	0.549805
132.5	-0.00683594	-0.141113	0.280762	0.499512	0.35791	0.244629	0.453125
132.6	0.146973	-0.132813	0.460938	0.655762	0.533691	0.352051	0.575684
132.7	0.164551	-0.065918	0.467773	0.694336	0.604492	0.314453	0.531738
132.8	-0.122559	-0.126465	0.150879	0.352539	0.260254	0.0107422	0.676758
132.9	-0.972656	-0.0844727	-0.682129	-0.600098	-0.589844	-0.700195	0.624023
133	-0.859375	-0.118164	-0.671875	-0.756836	-0.671875	-0.227539	0.589844
133.1	-0.0302734	-0.0483398	0.0102539	-0.00927734	0.13916	0.274902	0.614746
133.2	1.51367	-0.034668	1.72168	1.91553	1.82471	2.10645	0.609863
133.3	1.375	0.224121	1.61475	2.11475	1.81006	0.0756836	0.62793
133.4	-0.0390625	0.0131836	-0.109375	0.12207	0.223633	0.0473633	0.630371
133.5	0.17041	0.0493164	0.28125	0.319824	0.351563	0.118652	0.632813
133.6	0.0615234	0.059082	0.345215	0.289063	0.544434	0.178711	0.616211
133.7	0.00683594	0.0332031	0.23584	0.29834	0.311523	0.173828	0.55127
133.8	0.200195	0.195313	0.377441	0.515137	0.51416	0.478027	0.721191
133.9	0.831055	0.261719	0.994629	1.15137	1.13574	0.894043	0.547363
134	2.5293	0.20752	2.77002	2.88135	2.82031	2.18799	0.73584
134.1	2.87793	0.260742	2.9248	3.47363	3.18359	1.55029	0.785156
134.2	0.35498	0.34375	0.413574	0.862793	0.801758	-0.557617	0.541504
134.3	-3.78564	-0.136719	-3.74463	-3.49121	-3.4873	-3.47412	0.581055
134.4	-3.01904	-0.0620117	-2.94092	-3.17188	-2.81201	-0.159668	0.568359
134.5	0.435059	0.0849609	0.546387	0.552734	0.691406	0.522461	0.728027
134.6	0.390137	0.141602	0.394043	0.689941	0.638184	0.434082	0.64209
134.7	0.194336	0.169434	0.170898	0.605957	0.508301	0.309082	0.624023
134.8	0.0209961	-0.118164	0.0297852	0.493164	0.243652	0.23584	0.530273
134.9	0.293945	-0.175781	0.394531	0.801758	0.535156	0.644531	0.527344
135	1.39844	-0.129883	1.4375	1.80615	1.84229	1.56543	0.557129
135.1	1.54395	0.0991211	1.58691	1.94385	1.87598	0.849121	0.721191
135.2	1.04395	0.0888672	1.07568	1.5293	1.29004	0.996094	0.822754
135.3	0.836914	-0.0146484	0.876953	1.36133	1.02441	0.697754	0.563477
135.4	0.640137	-0.0703125	0.582031	1.21338	0.845215	0.446777	0.431152
135.5	0.441406	-0.0961914	0.503906	0.852051	0.726563	0.212402	0.428223
135.6	0.330078	-0.132813	0.425781	0.629395	0.640625	0.282715	0.458496
135.7	0.285156	-0.0712891	0.398438	0.5	0.577637	0.31543	0.497559
135.8	0.0429688	-0.0483398	0.165527	0.240723	0.367188	0.191895	0.466309
135.9	-0.282227	-0.0595703	0.015625	0.0351563	0.165527	0.012207	0.520996
136	-0.446777	-0.0571289	-0.121094	-0.0483398	0.00634766	-0.240723	0.595215
136.1	-0.316406	-0.0961914	-0.148926	-0.027832	-0.00390625	-0.21582	0.575684
136.2	0.0366211	-0.0649414	0.0180664	0.21875	0.0976563	-0.0776367	0.575684
136.3	0.171875	-0.0454102	0.171875	0.352539	0.212402	0.0380859	0.556152
136.4	0.141602	0.0078125	0.195313	0.447754	0.377441	0.132813	0.583496
136.5	0.140625	0.0170898	0.234375	0.432129	0.460938	0.178711	0.60791
136.6	0.14209	-0.00488281	0.246094	0.425781	0.484375	0.178711	0.600586
136.7	0.136719	-0.0375977	0.210938	0.408691	0.462402	0.158203	0.566895
136.8	0.145996	-0.115723	0.255371	0.425781	0.457031	0.20459	0.595215
136.9	0.144531	-0.0986328	0.263184	0.450195	0.453125	0.254395	0.614746
137	0.244629	0.0117188	0.396973	0.600098	0.57666	0.28125	0.763184
137.1	0.256348	0.0249023	0.424316	0.623535	0.603027	0.280273	0.697754
137.2	0.124023	-0.0195313	0.42334	0.615723	0.597656	0.268555	0.591309
137.3	0.109375	-0.0712891	0.287598	0.412598	0.511719	0.236328	0.561523
137.4	0.0673828	-0.0898438	0.277344	0.354004	0.279785	0.207031	0.544434
137.5	0.0771484	-0.0649414	0.285156	0.35791	0.270996	0.199707	0.527344
137.6	0.0585938	-0.0517578	0.290527	0.320313	0.260742	0.178711	0.510742
137.7	0.0756836	-0.0556641	0.316406	0.311035	0.253906	0.199707	0.495117
137.8	0.0634766	-0.0493164	0.3125	0.279785	0.271973	0.157715	0.486816
137.9	0.0693359	0.155273	0.300781	0.270996	0.317871	0.142578	0.523926
138	0.0493164	0.146973	0.296875	0.237793	0.344727	0.114746	0.509277
138.1	-0.0742188	0.00292969	0.17334	0.111816	0.207031	-0.0375977	0.415527
138.2	0.0522461	-0.00390625	0.17041	0.261719	0.208496	0.0888672	0.410156
138.3	0.0429688	0.0249023	0.165527	0.286133	0.353027	0.124023	0.413086
138.4	0.0258789	0.0107422	0.160156	0.265625	0.354004	0.141113	0.421875
138.5	0.00683594	0.00927734	0.243652	0.238281	0.364746	0.12793	0.420898
138.6	-0.015625	-0.00878906	0.234375	0.235352	0.341309	0.109863	0.411621
138.7	0	-0.0297852	0.234375	0.224121	0.332031	0.124023	0.376465
138.8	0.0234375	-0.0219727	0.25	0.236816	0.371094	0.181152	0.424805
138.9	0.015625	-0.0664063	0.244629	0.237793	0.369629	0.181152	0.441406
139	-0.0351563	-0.0844727	0.257813	0.230469	0.354004	0.166992	0.445313
139.1	-0.0678711	-0.0859375	0.225098	0.196289	0.34375	0.139648	0.445313
139.2	-0.0737305	-0.081543	0.213867	0.216309	0.341309	0.133301	0.470703
139.3	-0.106934	-0.104004	0.17334	0.200195	0.324219	0.124023	0.424805
139.4	-0.117188	-0.0947266	0.144531	0.1875	0.316406	0.121582	0.427246
139.5	-0.128906	-0.127441	0.115723	0.180664	0.285156	0.114746	0.40625
139.6	-0.114746	-0.14209	0.109375	0.189941	0.28125	0.118652	0.415527
139.7	-0.0805664	-0.131348	0.113281	0.197754	0.308594	0.139648	0.424316
139.8	-0.0922852	-0.129883	0.134277	0.20166	0.296875	0.142578	0.437988
139.9	-0.0976563	-0.182129	0.132813	0.217285	0.300781	0.118652	0.433594
140	-0.0927734	-0.1875	0.145508	0.241699	0.304688	0.134277	0.458496
140.1	-0.101563	-0.208008	0.167969	0.234375	0.3125	0.112305	0.464844
140.2	-0.0585938	-0.205566	0.214844	0.268066	0.34375	0.141113	0.487305
140.3	-0.0805664	-0.286133	0.192871	0.252441	0.32959	0.090332	0.460938
140.4	-0.177246	-0.344727	0.102539	0.182129	0.262695	-0.0180664	0.411621
140.5	-0.533691	-0.119629	-0.217285	-0.11084	-0.0712891	-0.329102	0.059082
140.6	-2.23535	-0.251953	-1.8916	-1.83447	-1.68311	-2.00049	-1.30566
140.7	-1.35059	0.507813	-1.41455	-1.32617	-1.01221	-1.50537	0.444824
140.8	0.941406	-0.0742188	-0.410156	-0.263184	0.324219	-0.157715	1.01807
140.9	1.59326	-0.0844727	1.45703	1.78711	1.99219	1.71631	0.939941
141	-0.0356445	-0.0986328	0.662598	0.441406	0.458496	0.252441	-0.208496
141.1	-0.776367	-0.046875	-0.170898	-0.632813	-0.627441	-0.852539	-0.0336914
141.2	-0.544434	0.0200195	-0.90625	-0.476563	-0.577148	-0.787109	0.291992
141.3	-0.351563	-0.0253906	-0.720703	-0.18457	-0.268066	-0.43457	0.401367
141.4	-0.22168	-0.126465	-0.413086	-0.122559	-0.106934	-0.188477	0.525879
141.5	-0.242676	-0.151367	-0.261719	0.00390625	-0.0458984	-0.0717773	0.475586
141.6	-0.121094	-0.0737305	0.0532227	0.20166	0.158691	0.0888672	0.591309
141.7	-0.115723	-0.0976563	0.140625	0.260254	0.213379	0.116211	0.592773
141.8	-0.106934	-0.110352	0.136719	0.330566	0.253906	0.122559	0.561523
141.9	-0.0742188	-0.0805664	0.165527	0.34082	0.285156	0.191895	0.567871
142	-0.09375	-0.0947266	0.158691	0.368164	0.291504	0.20459	0.54834
142.1	-0.0844727	-0.168945	0.191406	0.424316	0.320313	0.217773	0.557617
142.2	-0.0888672	-0.242188	0.188477	0.429199	0.329102	0.222656	0.551758
142.3	-0.00927734	-0.136719	0.339355	0.539063	0.481445	0.327148	0.649902
142.4	0.0766602	-0.0273438	0.478027	0.62207	0.665039	0.403809	0.706055
142.5	0.125	0.0805664	0.48291	0.672852	0.731934	0.415527	0.710938
142.6	0.145508	0.118652	0.48291	0.714355	0.648438	0.431152	0.730469
142.7	0.203125	0.181152	0.501465	0.75	0.620117	0.484863	0.751465
142.8	0.258789	0.213379	0.508789	0.723633	0.598633	0.527344	0.765625
142.9	0.258789	0.231445	0.48291	0.694824	0.533691	0.525879	0.743164
[truncated: 702 more rows]

## Sheet: Figure 4C -D20 Fc4-1 isotherm
[D20] (µM)	Response Units (RU)
0.15625	10.4632
0.3125	17.701
0.625	27.4711
1.25	38.3149
2.5	48.1252
5	56.3541
10	63.0464

## Sheet: Figure 4D -D21 Fc4-1 sensorgram
	[D21] M
Time (sec)	1.56e-007	3.13e-007	6.25e-007	1.25e-006	2.5e-006	5e-006	1e-005		Note: Data in blue and with an Asterix is excluded in the figure
-56.8	0.0234375	0.0952148	0.265625	0.488281	0.42334	0.244629	0.403809
-56.7	-0.0859375	0.0249023	0.167969	0.269531	0.23584	0.205566	0.384277
-56.6	-0.0078125	0.0913086	0.214844	0.289063	0.231934	0.225098	0.431152
-56.5	-0.0273438	0.0405273	0.203125	0.269531	0.192871	0.213379	0.431152
-56.4	-0.03125	0.0600586	0.222656	0.265625	0.200684	0.193848	0.411621
-56.3	-0.0585938	0.0405273	0.222656	0.234375	0.181152	0.162598	0.380371
-56.2	-0.0585938	0.0209961	0.203125	0.238281	0.17334	0.150879	0.36084
-56.1	-0.046875	0.0327148	0.234375	0.238281	0.181152	0.174316	0.36084
-56	-0.0507813	0.0327148	0.234375	0.238281	0.181152	0.174316	0.36084
-55.9	-0.0390625	0.0522461	0.246094	0.238281	0.192871	0.174316	0.372559
-55.8	-0.0390625	0.0522461	0.242188	0.238281	0.181152	0.174316	0.36084
-55.7	-0.0610352	0.0483398	0.248535	0.23291	0.174316	0.176758	0.345215
-55.6	-0.0991211	0.0703125	0.277344	0.265625	0.22168	0.248535	0.278809
-55.5	-0.0429688	0.122559	0.346191	0.3125	0.241211	0.327637	0.363281
-55.4	-0.0234375	0.118652	0.339844	0.311035	0.199219	0.354004	0.370117
-55.3	-0.015625	0.136719	0.347656	0.300781	0.21875	0.355469	0.386719
-55.2	-0.00927734	0.163086	0.361816	0.318848	0.253906	0.352539	0.398438
-55.1	0.00390625	0.160156	0.34375	0.316406	0.23584	0.356445	0.384277
-55	0.00390625	0.153809	0.356934	0.321777	0.239746	0.369629	0.384277
-54.9	0.0078125	0.15918	0.354004	0.328125	0.25293	0.393066	0.385742
-54.8	0.00634766	0.15625	0.361816	0.321289	0.240723	0.396973	0.398438
-54.7	0.0288086	0.174805	0.372559	0.333496	0.27002	0.398438	0.416992
-54.6	0.0234375	0.171875	0.361816	0.321777	0.263184	0.387695	0.403809
-54.5	0.0219727	0.185059	0.368652	0.330566	0.26416	0.393066	0.40625
-54.4	0.00537109	0.174805	0.356934	0.32959	0.258301	0.38916	0.393555
-54.3	0.0258789	0.182129	0.35791	0.321289	0.268066	0.38916	0.40625
-54.2	0.0195313	0.186523	0.35791	0.324219	0.268555	0.396973	0.385742
-54.1	0.0561523	0.186523	0.374023	0.333496	0.268555	0.40625	0.39209
-54	0.0288086	0.169434	0.350098	0.317871	0.234375	0.38916	0.371094
-53.9	0.0244141	0.162598	0.347656	0.308105	0.253906	0.374512	0.364746
-53.8	0.0351563	0.145996	0.356445	0.292969	0.25	0.373535	0.372559
-53.7	0.0366211	0.15918	0.36084	0.306152	0.262207	0.378906	0.375
-53.6	0.0454102	0.167969	0.361816	0.303223	0.279785	0.378418	0.386719
-53.5	0.0615234	0.163086	0.358398	0.311523	0.285645	0.376465	0.375488
-53.4	0.0478516	0.144531	0.346191	0.287598	0.256348	0.352539	0.363281
-53.3	0.0454102	0.151367	0.347656	0.283691	0.255371	0.356445	0.353027
-53.2	0.0444336	0.135742	0.347656	0.282715	0.256836	0.367188	0.34668
-53.1	0.0507813	0.141602	0.338379	0.291504	0.246094	0.375977	0.351563
-53	0.0415039	0.138184	0.347656	0.279785	0.247559	0.365723	0.347656
-52.9	0.0263672	0.147461	0.349121	0.272461	0.239746	0.346191	0.34668
-52.8	0.00634766	0.139648	0.34375	0.244629	0.243652	0.334473	0.341309
-52.7	0.0170898	0.134277	0.347656	0.245117	0.237305	0.328125	0.334961
-52.6	0.03125	0.134277	0.347656	0.244629	0.243652	0.334473	0.339844
-52.5	0.0205078	0.123535	0.338379	0.221191	0.221191	0.313477	0.324219
-52.4	0.0366211	0.12793	0.337402	0.231934	0.225586	0.322754	0.334961
-52.3	0.0249023	0.135742	0.335938	0.220215	0.225586	0.313965	0.334961
-52.2	0.0244141	0.134277	0.342285	0.221191	0.213379	0.294922	0.342285
-52.1	0.0234375	0.128906	0.335938	0.227539	0.196777	0.292969	0.333496
-52	0.0170898	0.128906	0.34375	0.226563	0.198242	0.271973	0.327148
-51.9	0.0249023	0.125488	0.349121	0.243652	0.192871	0.265625	0.324219
-51.8	0.0102539	0.121094	0.354004	0.230469	0.196777	0.271973	0.331055
-51.7	0.00244141	0.0913086	0.347656	0.221191	0.186035	0.26123	0.311035
-51.6	0.0117188	0.103027	0.345215	0.238281	0.203613	0.26416	0.31543
-51.5	0.0209961	0.0952148	0.354004	0.228027	0.191406	0.253906	0.311523
-51.4	0.0117188	0.0942383	0.347656	0.220215	0.184082	0.246094	0.304688
-51.3	0.00634766	0.0922852	0.339844	0.219727	0.18457	0.245605	0.313965
-51.2	0.0107422	0.0717773	0.335938	0.212402	0.195801	0.23584	0.313965
-51.1	0.0102539	0.0756836	0.328125	0.213379	0.174316	0.214355	0.306152
-51	0.0117188	0.0849609	0.333496	0.222656	0.17627	0.21875	0.302246
-50.9	0.00244141	0.0820313	0.314941	0.220215	0.164063	0.221191	0.303711
-50.8	0.0131836	0.100586	0.325684	0.217285	0.163086	0.223633	0.320313
-50.7	0.00244141	0.09375	0.316406	0.207031	0.153809	0.207031	0.303711
-50.6	-0.0102539	0.0825195	0.304688	0.192871	0.153809	0.193848	0.290527
-50.5	-0.015625	0.0727539	0.30957	0.199219	0.15625	0.188477	0.285156
-50.4	-0.0273438	0.0639648	0.299805	0.182129	0.145996	0.179688	0.28418
-50.3	-0.0273438	0.0522461	0.286133	0.182129	0.144531	0.180664	0.273438
-50.2	-0.0273438	0.0561523	0.288086	0.19043	0.139648	0.178223	0.274902
-50.1	-0.0390625	0.0419922	0.275879	0.179688	0.124023	0.164063	0.260742
-50	-0.0585938	0.0327148	0.264648	0.179688	0.11084	0.150879	0.249023
-49.9	-0.0756836	0.0195313	0.265137	0.188477	0.101563	0.143066	0.229004
-49.8	-0.0556641	0.0107422	0.280273	0.19043	0.0966797	0.143066	0.242676
-49.7	-0.0507813	0.0224609	0.287598	0.20166	0.117188	0.154785	0.239746
-49.6	-0.0576172	0.0219727	0.29541	0.189941	0.103027	0.145508	0.238281
-49.5	-0.0673828	0.0224609	0.276367	0.19043	0.0966797	0.145996	0.22168
-49.4	-0.0703125	0.00537109	0.273438	0.178223	0.0991211	0.141602	0.210938
-49.3	-0.078125	0.0107422	0.253906	0.161621	0.0849609	0.135254	0.213867
-49.2	-0.0625	0.00537109	0.257813	0.152344	0.0961914	0.13916	0.214844
-49.1	-0.0600586	0.0141602	0.242188	0.146973	0.109375	0.154785	0.210938
-49	-0.0727539	0.0209961	0.222656	0.158691	0.124023	0.172852	0.208496
-48.9	-0.0874023	0.0693359	0.212402	0.188965	0.179688	0.217285	0.243652
-48.8	-0.046875	0.127441	0.240723	0.169434	0.239746	0.27832	0.332031
-48.7	-0.046875	0.147461	0.238281	0.146973	0.263184	0.285156	0.345215
-48.6	-0.0600586	0.127441	0.225098	0.127441	0.198242	0.21582	0.319336
-48.5	-0.0791016	0.134277	0.20459	0.118652	0.0756836	0.148438	0.23877
-48.4	-0.11084	0.143555	0.185059	0.09375	0.0625	0.128906	0.132813
-48.3	-0.105469	-0.0488281	0.126465	0.106934	0.0512695	0.09375	0.153809
-48.2	-0.105469	-0.424316	0.0219727	0.0727539	0.00537109	-0.00537109	0.14209
-48.1	-0.109375	-0.221191	-0.00390625	0.0820313	0.0078125	-0.0249023	0.125
-48	-0.131348	-0.209473	0.0209961	0.0756836	-0.000976563	-0.046875	0.188965
-47.9	-0.15625	-0.0893555	0.0615234	0.0561523	-0.0234375	-0.0341797	0.247559
-47.8	-0.12793	0.152344	0.27832	0.0297852	0.0625	0.148438	0.255371
-47.7	0.0454102	0.202148	0.417969	0.0688477	0.210938	0.352539	0.286621
-47.6	0.0625	0.192871	0.455566	0.145508	0.212402	0.373535	0.328125
-47.5	0.0546875	0.188965	0.435059	0.17334	0.203125	0.369629	0.390625
-47.4	0.0351563	0.158691	0.416504	0.162598	0.181152	0.34375	0.376465
-47.3	0.00683594	0.142578	0.370117	0.143555	0.160645	0.294434	0.344238
-47.2	-0.0288086	0.0678711	0.299805	0.104004	0.108398	0.243164	0.278809
-47.1	-0.0400391	0.0498047	0.259277	0.0966797	0.0678711	0.216309	0.256836
-47	-0.0561523	0.0405273	0.230469	0.0805664	0.0522461	0.176758	0.228027
-46.9	-0.0610352	0.0302734	0.199219	0.0742188	0.0380859	0.148438	0.208496
-46.8	-0.0717773	-0.0131836	0.180664	0.0507813	0.0117188	0.111816	0.183594
-46.7	-0.0742188	-0.0283203	0.157715	0.0585938	0.00927734	0.0820313	0.180176
-46.6	-0.0561523	-0.0429688	0.146973	0.0830078	0.0117188	0.0751953	0.193848
-46.5	-0.0649414	-0.0776367	0.125	0.0913086	-0.00634766	0.0649414	0.181152
-46.4	-0.115723	-0.169922	0.103027	0.0654297	-0.0385742	0.0141602	0.160645
-46.3	-0.332031	-0.454102	-0.09375	-0.165527	-0.251465	-0.213379	0.154785
-46.2	-1.20703	-1.03516	-0.947754	-1.16797	-1.03467	-1.25293	0.20459
-46.1	-1.27344	-1.25098	-0.811035	-1.43359	-1.07617	-1.88037	0.195801
-46	0.912109	0.390137	2.03906	2.18115	1.43896	0.790527	0.102051
-45.9	0.015625	0.0756836	0.464844	0.528809	0.131836	0.730469	-0.0332031
-45.8	0.376465	0.0795898	0.775879	0.753906	0.381348	0.979004	0.0664063
-45.7	0.229004	0.0585938	0.397461	0.557617	0.12793	0.762695	0.125
-45.6	-0.131348	0.0395508	0.163086	0.0390625	0.0341797	0.132813	0.171875
-45.5	-0.113281	0.0195313	0.167969	0.0966797	0.0273438	0.0820313	0.290527
-45.4	-0.114746	0.0571289	0.143066	0.0439453	-0.0322266	0.0776367	0.330566
-45.3	-0.133789	0.143066	0.131348	0.0732422	-0.140625	0.144043	0.402344
-45.2	-0.228516	-0.0424805	-0.00585938	-0.0546875	-0.244141	0.0395508	0.251465
-45.1	-0.166016	-0.141113	0.043457	-0.0844727	-0.185547	-0.0429688	0.145996
-45	-0.126465	-0.274414	0.0703125	-0.108398	-0.118652	-0.133301	0.0444336
-44.9	-0.0102539	-0.217285	0.105469	0.0288086	0.00830078	-0.0180664	0.0874023
-44.8	-0.0703125	-0.186035	0.126465	0.0454102	-0.0595703	-0.00683594	0.126465
-44.7	-0.0820313	-0.186035	0.0834961	0.0249023	-0.0742188	-0.00146484	0.0888672
-44.6	-0.0458984	-0.171875	0.114258	0.0996094	-0.015625	0.0634766	0.0766602
-44.5	0.00292969	-0.149414	0.118652	0.151367	0.0263672	0.10791	0.0981445
-44.4	-0.00390625	-0.125	0.127441	0.150879	0.03125	0.125977	0.101563
-44.3	-0.0351563	-0.12207	0.114746	0.138184	0.0161133	0.122559	0.0888672
-44.2	-0.0273438	-0.105469	0.115723	0.135254	0.0219727	0.104004	0.105469
-44.1	-0.0263672	-0.0913086	0.127441	0.128906	0.0249023	0.10498	0.114746
-44	-0.0336914	-0.0688477	0.132813	0.131348	0.015625	0.100098	0.121094
-43.9	-0.0273438	-0.0517578	0.148438	0.140625	0.0224609	0.115723	0.145996
-43.8	-0.0297852	-0.0493164	0.148438	0.135742	0.0107422	0.101563	0.143555
-43.7	-0.0405273	-0.0634766	0.145996	0.117188	0.00146484	0.0898438	0.134277
-43.6	-0.0522461	-0.0625	0.131348	0.111816	-0.00927734	0.0854492	0.128906
-43.5	-0.0454102	-0.0556641	0.138184	0.108398	0.0146484	0.0742188	0.137207
-43.4	-0.0571289	-0.0625	0.131348	0.0922852	0.00537109	0.0664063	0.134277
-43.3	-0.0625	-0.0493164	0.14209	0.105469	0.0209961	0.0751953	0.138184
-43.2	-0.0546875	-0.0400391	0.13916	0.117188	0.0341797	0.0766602	0.140625
-43.1	-0.0522461	-0.0600586	0.166504	0.104004	0.0273438	0.0830078	0.138184
-43	-0.0439453	-0.0400391	0.178711	0.114746	0.0356445	0.109375	0.153809
-42.9	-0.0356445	-0.0351563	0.18457	0.131348	0.0439453	0.125977	0.158691
-42.8	-0.0258789	-0.0258789	0.1875	0.143066	0.0537109	0.133789	0.177246
-42.7	-0.046875	-0.0258789	0.1875	0.152344	0.03125	0.117188	0.165527
-42.6	-0.0454102	-0.0244141	0.188965	0.155273	0.0380859	0.125	0.166992
-42.5	-0.0429688	-0.0195313	0.195313	0.17041	0.0444336	0.12207	0.17334
-42.4	-0.0585938	-0.0283203	0.185059	0.177246	0.0419922	0.115723	0.17334
-42.3	-0.0600586	-0.0483398	0.176758	0.166504	0.03125	0.114258	0.17334
-42.2	-0.078125	-0.0439453	0.177246	0.160156	0.0249023	0.106934	0.174805
-42.1	-0.0791016	-0.0385742	0.166992	0.161621	0.0263672	0.0922852	0.169434
-42	-0.0795898	-0.0415039	0.164063	0.167969	0.0327148	0.0961914	0.169434
-41.9	-0.0639648	-0.0273438	0.168945	0.182129	0.046875	0.123535	0.181152
-41.8	-0.0571289	-0.0180664	0.189941	0.179688	0.0537109	0.115723	0.181152
-41.7	-0.0664063	-0.0180664	0.203125	0.179688	0.0546875	0.114258	0.179688
-41.6	-0.0664063	-0.0180664	0.220215	0.177246	0.0483398	0.0961914	0.165527
-41.5	-0.0678711	-0.015625	0.239258	0.178223	0.0561523	0.0986328	0.175781
-41.4	-0.0585938	-0.00634766	0.261719	0.1875	0.0561523	0.105469	0.185059
-41.3	-0.0454102	0.00683594	0.288086	0.191406	0.0693359	0.0976563	0.186523
-41.2	-0.046875	0.00146484	0.285156	0.191406	0.0756836	0.104004	0.192871
-41.1	-0.0483398	0.00146484	0.285156	0.179688	0.0756836	0.104004	0.192871
-41	-0.0664063	-0.00634766	0.285156	0.177246	0.0742188	0.0922852	0.192871
-40.9	-0.0546875	0.00244141	0.287598	0.17041	0.078125	0.0947266	0.195313
-40.8	-0.0390625	0.00292969	0.303223	0.182129	0.0874023	0.104004	0.20459
-40.7	-0.0366211	-0.00634766	0.296875	0.191406	0.0888672	0.104004	0.206055
-40.6	-0.0273438	-0.00634766	0.296875	0.179688	0.0952148	0.0922852	0.200684
-40.5	-0.0375977	-0.00878906	0.286621	0.177246	0.0952148	0.0898438	0.200684
-40.4	-0.0546875	-0.0180664	0.269531	0.160156	0.0874023	0.0673828	0.192871
-40.3	-0.0561523	-0.0195313	0.265625	0.158691	0.0859375	0.0634766	0.191406
-40.2	-0.0625	-0.0234375	0.25	0.14209	0.0795898	0.0610352	0.185059
-40.1	-0.0546875	-0.00634766	0.256348	0.15625	0.0874023	0.0766602	0.185059
-40	-0.0649414	-0.0126953	0.251465	0.160156	0.0864258	0.0795898	0.186523
-39.9	-0.0610352	-0.00634766	0.246094	0.167969	0.0834961	0.0922852	0.192871
-39.8	-0.0585938	0.00537109	0.257813	0.177246	0.0952148	0.106445	0.20459
-39.7	-0.0585938	0.00537109	0.255371	0.166504	0.0834961	0.115723	0.19043
-39.6	-0.0585938	-0.00634766	0.25	0.161621	0.0820313	0.115723	0.181152
-39.5	-0.0664063	-0.00488281	0.268066	0.17041	0.0756836	0.115723	0.179688
-39.4	-0.0561523	0.0131836	0.289063	0.191406	0.0849609	0.115723	0.17334
-39.3	-0.0883789	-0.00634766	0.26709	0.183594	0.0639648	0.104004	0.161621
-39.2	-0.0810547	0.00634766	0.297852	0.213379	0.078125	0.118164	0.167969
-39.1	-0.0610352	0.00927734	0.289063	0.222656	0.0874023	0.127441	0.177246
-39	-0.0546875	-0.00244141	0.290527	0.210938	0.0874023	0.127441	0.178711
-38.9	-0.0664063	-0.00488281	0.29541	0.210938	0.0874023	0.113281	0.175781
-38.8	-0.0664063	-0.0166016	0.28418	0.200684	0.0756836	0.100098	0.174805
-38.7	-0.0585938	-0.015625	0.26416	0.197754	0.0849609	0.0922852	0.175781
-38.6	-0.0664063	-0.0141602	0.255371	0.188965	0.0913086	0.09375	0.185059
-38.5	-0.0585938	-0.00488281	0.252441	0.185059	0.101563	0.10791	0.192871
-38.4	-0.0742188	-0.0141602	0.228027	0.158691	0.0952148	0.0947266	0.165527
-38.3	-0.0766602	-0.0258789	0.21875	0.135742	0.0927734	0.101563	0.163086
-38.2	-0.0834961	-0.0219727	0.222656	0.118164	0.0834961	0.097168	0.145996
-38.1	-0.0742188	-0.0195313	0.238281	0.121094	0.0834961	0.109375	0.134277
-38	-0.0639648	-0.0141602	0.24707	0.131348	0.0859375	0.125977	0.144531
-37.9	-0.0571289	0	0.23584	0.130371	0.0952148	0.133789	0.151367
-37.8	-0.0625	-0.0151367	0.225586	0.125	0.0952148	0.126465	0.134277
-37.7	-0.0561523	-0.0170898	0.223633	0.132813	0.0952148	0.123535	0.136719
-37.6	-0.0454102	-0.0151367	0.216309	0.152344	0.0991211	0.111816	0.135742
-37.5	-0.0366211	-0.015625	0.207031	0.171875	0.117188	0.111816	0.145996
-37.4	-0.0297852	-0.0078125	0.205566	0.189941	0.114746	0.111816	0.175781
-37.3	-0.0375977	-0.0151367	0.198242	0.203125	0.108398	0.123535	0.186523
-37.2	-0.0195313	-0.00634766	0.207031	0.222656	0.126465	0.123535	0.192871
-37.1	-0.0195313	-0.00878906	0.207031	0.222656	0.126465	0.123535	0.19043
-37	-0.0195313	-0.0180664	0.195313	0.222656	0.124023	0.135254	0.179688
-36.9	-0.0185547	-0.0273438	0.197754	0.225098	0.117188	0.137695	0.17334
-36.8	-0.015625	-0.0195313	0.209473	0.234375	0.126465	0.146973	0.17334
-36.7	-0.0180664	-0.0361328	0.213867	0.229492	0.124023	0.152344	0.17334
-36.6	-0.0288086	-0.046875	0.196289	0.197754	0.113281	0.143066	0.171875
-36.5	-0.0351563	-0.0517578	0.208496	0.188965	0.105469	0.145508	0.165527
-36.4	-0.0351563	-0.0429688	0.199219	0.178223	0.100586	0.166504	0.165527
-36.3	-0.0336914	-0.0361328	0.188965	0.170898	0.0966797	0.167969	0.168457
-36.2	-0.0273438	-0.0493164	0.195313	0.182129	0.103027	0.162598	0.179688
-36.1	-0.0273438	-0.0649414	0.195313	0.191406	0.103027	0.162598	0.161621
-36	-0.0297852	-0.0673828	0.195313	0.179688	0.0952148	0.174316	0.155273
-35.9	-0.0390625	-0.0742188	0.195313	0.175781	0.0976563	0.174316	0.161621
-35.8	-0.0366211	-0.0625	0.197754	0.160156	0.109375	0.176758	0.162598
-35.7	-0.0170898	-0.0454102	0.207031	0.15625	0.118652	0.186035	0.163086
-35.6	-0.0234375	-0.0415039	0.205566	0.128906	0.106934	0.183594	0.149902
-35.5	-0.0219727	-0.0244141	0.194336	0.130371	0.109863	0.186035	0.135742
-35.4	-0.015625	-0.0234375	0.208008	0.135254	0.125	0.18457	0.144531
-35.3	-0.015625	-0.0141602	0.208496	0.130371	0.134277	0.174316	0.152344
-35.2	-0.0180664	-0.0141602	0.199219	0.146973	0.136719	0.15625	0.134277
-35.1	-0.0273438	-0.0126953	0.199219	0.140625	0.145996	0.152344	0.135742
-35	-0.0219727	-0.00390625	0.185059	0.138184	0.133301	0.13916	0.138184
-34.9	-0.0288086	-0.00878906	0.178223	0.128906	0.114746	0.123535	0.124023
-34.8	-0.0117188	-0.0126953	0.195313	0.136719	0.122559	0.132813	0.138184
-34.7	-0.00927734	-0.0195313	0.197754	0.13916	0.125	0.141602	0.135254
-34.6	0	-0.0102539	0.207031	0.136719	0.134277	0.150879	0.153809
-34.5	0.00244141	-0.0078125	0.207031	0.138184	0.122559	0.15332	0.155273
-34.4	0.0141602	-0.00146484	0.20166	0.149414	0.125	0.165039	0.166504
-34.3	0.0351563	0.0302734	0.224121	0.179688	0.148438	0.186035	0.196777
-34.2	0.0249023	0.0249023	0.21875	0.167969	0.145996	0.166504	0.17334
-34.1	0.03125	0.0249023	0.21875	0.167969	0.134277	0.166504	0.17334
-34	0.0288086	0.0224609	0.20459	0.165527	0.133301	0.152344	0.170898
-33.9	0.0234375	0.015625	0.209473	0.15625	0.132813	0.145508	0.161621
-33.8	0.046875	0.012207	0.216309	0.165527	0.139648	0.147461	0.15918
-33.7	0.0180664	0.0195313	0.205566	0.152344	0.128906	0.118164	0.145996
-33.6	0.0185547	0.0131836	0.196777	0.132813	0.121582	0.10791	0.12793
-33.5	0.0102539	0.0249023	0.197754	0.127441	0.128906	0.102539	0.128906
-33.4	0.00390625	0.0288086	0.199219	0.121094	0.114746	0.0976563	0.125
-33.3	0.00146484	0.0405273	0.194336	0.118652	0.11084	0.101563	0.131836
-33.2	-0.0117188	0.0249023	0.171875	0.106934	0.0913086	0.0908203	0.120117
-33.1	-0.0273438	0.0249023	0.15625	0.0976563	0.0756836	0.0844727	0.125
-33	-0.0288086	0.0234375	0.154785	0.0986328	0.0742188	0.0854492	0.132813
-32.9	-0.0375977	0.0146484	0.144531	0.0991211	0.0654297	0.0859375	0.126465
-32.8	-0.0493164	0.00292969	0.12793	0.0874023	0.0537109	0.0756836	0.125488
-32.7	-0.0585938	-0.00390625	0.125	0.078125	0.0444336	0.0751953	0.122559
-32.6	-0.0419922	0.0078125	0.127441	0.0805664	0.046875	0.0869141	0.125
-32.5	-0.0375977	0.0146484	0.134277	0.0898438	0.0537109	0.0952148	0.134277
-32.4	-0.0351563	0.00292969	0.127441	0.0898438	0.0458984	0.0922852	0.135742
-32.3	-0.0336914	-0.00634766	0.138184	0.0913086	0.0522461	0.106445	0.149902
-32.2	-0.0366211	0.00390625	0.146973	0.100098	0.0546875	0.118164	0.150879
-32.1	-0.00292969	0.0180664	0.166504	0.119629	0.0766602	0.137695	0.164063
-32	0.0131836	0.0419922	0.17334	0.126465	0.0927734	0.14209	0.168457
-31.9	0.00390625	0.0327148	0.164063	0.117188	0.0834961	0.123535	0.149902
-31.8	-0.000976563	0.0302734	0.161621	0.113281	0.0810547	0.121094	0.149902
-31.7	-0.0209961	0.0195313	0.150879	0.0961914	0.0703125	0.110352	0.148438
-31.6	-0.0219727	0.00830078	0.144531	0.0849609	0.0498047	0.104004	0.133301
-31.5	-0.0273438	-0.00634766	0.15625	0.0805664	0.0522461	0.115723	0.14209
-31.4	-0.0288086	-0.0102539	0.152344	0.0883789	0.0483398	0.114258	0.140625
-31.3	-0.0273438	-0.0258789	0.136719	0.0834961	0.03125	0.10791	0.134277
-31.2	-0.0249023	-0.0258789	0.136719	0.101563	0.0249023	0.109375	0.134277
-31.1	-0.015625	-0.0258789	0.136719	0.104004	0.0249023	0.115723	0.136719
-31	-0.0180664	-0.0283203	0.134277	0.11084	0.0239258	0.115723	0.133301
-30.9	-0.0258789	-0.046875	0.125	0.0898438	0.0209961	0.105469	0.130371
-30.8	-0.0170898	-0.0375977	0.125	0.0898438	0.0209961	0.114258	0.14209
-30.7	-0.0078125	-0.0375977	0.127441	0.0898438	0.0209961	0.125977	0.132813
-30.6	-0.0078125	-0.0375977	0.136719	0.0898438	0.0209961	0.136719	0.14209
-30.5	0.00390625	-0.0234375	0.150879	0.104004	0.0351563	0.159668	0.167969
-30.4	0.00390625	-0.0219727	0.152344	0.113281	0.0366211	0.179688	0.165527
-30.3	0.00390625	-0.0195313	0.152344	0.113281	0.046875	0.186035	0.165527
-30.2	0.00390625	-0.0102539	0.160156	0.113281	0.0561523	0.188477	0.165527
-30.1	0.00390625	-0.0205078	0.152344	0.101563	0.0483398	0.197754	0.174805
-30	0.00146484	-0.0180664	0.149902	0.0991211	0.0458984	0.192871	0.163086
-29.9	0	-0.0244141	0.148438	0.0991211	0.0327148	0.17041	0.161621
-29.8	0	-0.0297852	0.149902	0.105469	0.0327148	0.17041	0.161621
-29.7	-0.0078125	-0.0273438	0.144531	0.117188	0.0327148	0.17041	0.161621
-29.6	-0.00683594	-0.015625	0.145508	0.118164	0.0351563	0.165039	0.152344
-29.5	-0.00390625	-0.00634766	0.148438	0.121094	0.0341797	0.174316	0.161621
-29.4	-0.00634766	-0.0141602	0.148438	0.121094	0.0327148	0.174316	0.161621
-29.3	0.00537109	0.00439453	0.161621	0.134277	0.0458984	0.1875	0.17334
-29.2	0.00390625	0.00146484	0.167969	0.140625	0.0444336	0.182129	0.174805
-29.1	0.00634766	-0.00146484	0.17041	0.143066	0.0532227	0.18457	0.183594
-29	0.0234375	0.0146484	0.177246	0.140625	0.0483398	0.193848	0.192871
-28.9	0.0170898	0.00683594	0.169434	0.153809	0.0498047	0.195313	0.192871
-28.8	0.0219727	0.0131836	0.175781	0.160156	0.0537109	0.193848	0.192871
-28.7	0.0180664	0.015625	0.178223	0.150879	0.046875	0.196289	0.195313
-28.6	0.0249023	0.0234375	0.1875	0.160156	0.0561523	0.205566	0.20459
-28.5	0.015625	0.0185547	0.1875	0.160156	0.0444336	0.204102	0.202148
-28.4	0.0166016	0.0258789	0.189941	0.152344	0.0454102	0.20166	0.207031
-28.3	0.0209961	0.0317383	0.203125	0.153809	0.0498047	0.21875	0.217773
-28.2	0.0249023	0.0429688	0.228027	0.160156	0.0537109	0.223633	0.224121
-28.1	0.00390625	0.0366211	0.21875	0.160156	0.0444336	0.217285	0.222656
-28	0.00390625	0.0341797	0.207031	0.160156	0.0444336	0.214844	0.213867
-27.9	0.00390625	0.0249023	0.207031	0.160156	0.0444336	0.205566	0.20459
-27.8	0.00927734	0.0327148	0.226563	0.167969	0.0507813	0.213379	0.212402
-27.7	0.00244141	0.0351563	0.229004	0.157227	0.046875	0.21582	0.203125
-27.6	0.0102539	0.0444336	0.238281	0.160156	0.0561523	0.225098	0.224121
-27.5	0.00390625	0.0444336	0.226563	0.169434	0.0537109	0.223633	0.222656
-27.4	0.00292969	0.0458984	0.228027	0.161621	0.0341797	0.20459	0.217773
-27.3	0	0.0380859	0.234375	0.167969	0.0522461	0.20166	0.224121
-27.2	-0.00146484	0.0390625	0.23291	0.167969	0.0507813	0.20166	0.22168
-27.1	-0.0102539	0.0327148	0.226563	0.167969	0.0444336	0.20166	0.200684
-27	-0.0170898	0.0351563	0.214844	0.17041	0.0444336	0.193848	0.203125
-26.9	-0.0078125	0.0444336	0.214844	0.179688	0.0327148	0.192383	0.209961
-26.8	-0.0078125	0.043457	0.216309	0.181152	0.0341797	0.1875	0.194336
-26.7	-0.0078125	0.0405273	0.214844	0.175781	0.0327148	0.193848	0.208496
-26.6	-0.0078125	0.0415039	0.217285	0.178223	0.0351563	0.197754	0.209473
-26.5	-0.0078125	0.0444336	0.225098	0.196777	0.0419922	0.200195	0.212402
-26.4	-0.0078125	0.0458984	0.220215	0.177246	0.0341797	0.195313	0.213867
-26.3	-0.0078125	0.0498047	0.224121	0.195313	0.0273438	0.20166	0.220215
-26.2	-0.0078125	0.0429688	0.217285	0.18457	0.0234375	0.20166	0.220215
-26.1	-0.0078125	0.0546875	0.229004	0.189941	0.0351563	0.194824	0.222656
-26	-0.0078125	0.0639648	0.239746	0.200684	0.043457	0.199219	0.231934
-25.9	-0.0078125	0.0693359	0.243652	0.20459	0.0405273	0.191406	0.231934
-25.8	-0.0078125	0.0625	0.243164	0.196289	0.0429688	0.18457	0.231934
-25.7	-0.0078125	0.0717773	0.247559	0.212402	0.0537109	0.193848	0.233398
-25.6	-0.0078125	0.0693359	0.253906	0.21875	0.0507813	0.179688	0.239746
-25.5	-0.0078125	0.0576172	0.246094	0.20459	0.0522461	0.168945	0.238281
-25.4	-0.0078125	0.0507813	0.246094	0.197754	0.0522461	0.165039	0.231934
-25.3	-0.0078125	0.0585938	0.244629	0.217285	0.0522461	0.171875	0.243652
-25.2	-0.00927734	0.0498047	0.238281	0.208496	0.0522461	0.154785	0.243652
-25.1	-0.0166016	0.0522461	0.237305	0.188965	0.0522461	0.15625	0.230957
-25	-0.0195313	0.0522461	0.234375	0.193848	0.0444336	0.160156	0.238281
-24.9	-0.0195313	0.0522461	0.235352	0.179688	0.046875	0.141602	0.234375
-24.8	-0.0195313	0.0507813	0.23584	0.177246	0.0537109	0.149414	0.241211
-24.7	-0.0185547	0.046875	0.229004	0.17041	0.046875	0.145508	0.23291
-24.6	-0.0180664	0.0537109	0.23584	0.178223	0.0546875	0.152344	0.23584
-24.5	-0.0258789	0.0458984	0.226563	0.17334	0.0473633	0.144531	0.234863
-24.4	-0.0327148	0.0615234	0.214844	0.177246	0.0444336	0.149414	0.231934
-24.3	-0.0366211	0.0532227	0.217285	0.17041	0.0444336	0.145508	0.23291
-24.2	-0.0283203	0.0537109	0.224121	0.179688	0.0458984	0.153809	0.234863
-24.1	-0.03125	0.0419922	0.214844	0.177246	0.0522461	0.150879	0.230469
-24	-0.0302734	0.0429688	0.217285	0.17041	0.0610352	0.15332	0.224121
-23.9	-0.0180664	0.0625	0.238281	0.189941	0.0756836	0.172852	0.22168
-23.8	-0.0273438	0.0419922	0.224121	0.169434	0.0615234	0.152344	0.200684
-23.7	-0.0273438	0.0429688	0.225098	0.171875	0.0625	0.166504	0.210938
-23.6	-0.0273438	0.0498047	0.217773	0.179688	0.0576172	0.167969	0.203613
-23.5	-0.0297852	0.0537109	0.213379	0.177246	0.0615234	0.174316	0.199219
-23.4	-0.0390625	0.0498047	0.196777	0.160156	0.0522461	0.17041	0.19043
-23.3	-0.0366211	0.0429688	0.189941	0.160156	0.0532227	0.157227	0.183594
-23.2	-0.0375977	0.0507813	0.196777	0.158691	0.0458984	0.164063	0.203125
-23.1	-0.0483398	0.0444336	0.174316	0.152344	0.0366211	0.15332	0.194336
-23	-0.0546875	0.0405273	0.165527	0.149902	0.0341797	0.144531	0.185059
-22.9	-0.0556641	0.0239258	0.15625	0.140625	0.0263672	0.144531	0.185059
-22.8	-0.0561523	0.0219727	0.158691	0.144531	0.0336914	0.151855	0.1875
-22.7	-0.0483398	0.0249023	0.165527	0.158691	0.0366211	0.154785	0.194336
-22.6	-0.0546875	0.0366211	0.158691	0.152344	0.0366211	0.154785	0.1875
-22.5	-0.0532227	0.0249023	0.160156	0.153809	0.0366211	0.154785	0.195801
-22.4	-0.0458984	0.0366211	0.160156	0.158691	0.0390625	0.157227	0.193848
-22.3	-0.0415039	0.0263672	0.157715	0.153809	0.0473633	0.157715	0.194336
-22.2	-0.0351563	0.0444336	0.136719	0.162598	0.0454102	0.157227	0.1875
-22.1	-0.0366211	0.0429688	0.135254	0.167969	0.0458984	0.166504	0.194336
-22	-0.0336914	0.043457	0.135742	0.161621	0.0341797	0.17334	0.181152
-21.9	-0.0273438	0.0415039	0.133789	0.17041	0.0415039	0.171387	0.181152
-21.8	-0.0283203	0.043457	0.135742	0.177246	0.043457	0.171875	0.178711
-21.7	-0.0302734	0.0415039	0.123535	0.167969	0.0429688	0.162598	0.169434
-21.6	-0.0415039	0.0419922	0.131348	0.167969	0.0498047	0.161133	0.167969
-21.5	-0.0483398	0.0405273	0.125	0.166504	0.0415039	0.143066	0.161621
-21.4	-0.0390625	0.0405273	0.116211	0.161621	0.0551758	0.143066	0.161621
-21.3	-0.0390625	0.0522461	0.114258	0.154785	0.0532227	0.143066	0.161621
-21.2	-0.0258789	0.0639648	0.12793	0.161621	0.0693359	0.153809	0.170898
-21.1	-0.0209961	0.0664063	0.125977	0.167969	0.0756836	0.149414	0.161621
-21	-0.0351563	0.0615234	0.134277	0.166504	0.0742188	0.141602	0.160156
-20.9	-0.0336914	0.0654297	0.125	0.15918	0.0668945	0.145996	0.164551
-20.8	-0.0273438	0.0703125	0.127441	0.157227	0.0649414	0.145508	0.162598
-20.7	-0.0405273	0.0522461	0.134277	0.157715	0.0654297	0.15332	0.163086
-20.6	-0.0444336	0.0532227	0.118164	0.150879	0.0561523	0.135254	0.152344
-20.5	-0.0361328	0.0576172	0.120117	0.160156	0.0561523	0.136719	0.147461
-20.4	-0.0366211	0.0639648	0.119629	0.160156	0.0664063	0.15332	0.152344
-20.3	-0.0273438	0.0629883	0.12793	0.161621	0.074707	0.145996	0.147461
-20.2	-0.0273438	0.0805664	0.133789	0.176758	0.0805664	0.15332	0.160156
-20.1	-0.0288086	0.0693359	0.134277	0.177246	0.0834961	0.161133	0.151367
-20	-0.03125	0.0625	0.127441	0.171875	0.0771484	0.15625	0.144531
-19.9	-0.0180664	0.0693359	0.134277	0.183594	0.0820313	0.161133	0.151367
-19.8	-0.0258789	0.0615234	0.126465	0.166992	0.074707	0.153809	0.139648
-19.7	-0.00683594	0.0805664	0.135254	0.176758	0.0834961	0.161133	0.144531
-19.6	-0.015625	0.0834961	0.143066	0.179688	0.0820313	0.152344	0.151367
-19.5	-0.015625	0.0756836	0.134277	0.179688	0.0756836	0.141602	0.14209
-19.4	-0.015625	0.0756836	0.127441	0.177246	0.0756836	0.135254	0.14209
-19.3	-0.0273438	0.0756836	0.128906	0.167969	0.0756836	0.132813	0.14209
-19.2	-0.0273438	0.0756836	0.126465	0.160156	0.0732422	0.111816	0.14209
-19.1	-0.0234375	0.0849609	0.128906	0.160156	0.0756836	0.133789	0.152344
-19	-0.0234375	0.0756836	0.128906	0.160156	0.0742188	0.125	0.145996
-18.9	-0.0351563	0.0756836	0.128906	0.160156	0.0678711	0.104004	0.145996
-18.8	-0.0351563	0.0820313	0.117188	0.158691	0.0678711	0.104004	0.145996
-18.7	-0.0375977	0.0756836	0.117188	0.149902	0.0654297	0.106445	0.143555
-18.6	-0.0366211	0.0756836	0.136719	0.148438	0.0522461	0.123535	0.140625
-18.5	-0.0351563	0.078125	0.13916	0.148438	0.0546875	0.118164	0.136719
-18.4	-0.0297852	0.0849609	0.144531	0.144531	0.0615234	0.125	0.141113
-18.3	-0.0444336	0.078125	0.128906	0.131348	0.0546875	0.115723	0.125
-18.2	-0.0361328	0.0864258	0.130371	0.139648	0.0576172	0.115723	0.124023
-18.1	-0.0390625	0.0834961	0.134277	0.136719	0.0625	0.113281	0.140625
-18	-0.0405273	0.0795898	0.123535	0.135254	0.0561523	0.104004	0.134277
-17.9	-0.0600586	0.0625	0.115723	0.127441	0.0522461	0.101074	0.132813
-17.8	-0.0688477	0.0561523	0.109375	0.114746	0.0351563	0.0883789	0.12793
-17.7	-0.078125	0.043457	0.106934	0.118652	0.0263672	0.0756836	0.131836
-17.6	-0.0805664	0.0405273	0.0952148	0.0976563	0.0161133	0.0703125	0.120117
-17.5	-0.0913086	0.0390625	0.0844727	0.0961914	0.0117188	0.0595703	0.111816
-17.4	-0.0976563	0.0327148	0.0795898	0.0874023	0.00537109	0.0556641	0.114746
-17.3	-0.09375	0.0327148	0.0883789	0.078125	0.00537109	0.0649414	0.112305
-17.2	-0.0766602	0.0317383	0.0991211	0.078125	0.00927734	0.0664063	0.112305
-17.1	-0.0678711	0.03125	0.10791	0.0922852	0.0131836	0.0727539	0.117188
-17	-0.0678711	0.0258789	0.109375	0.0820313	0.015625	0.0581055	0.105469
-16.9	-0.0727539	0.027832	0.109375	0.0795898	-0.000976563	0.0600586	0.112305
-16.8	-0.0664063	0.0258789	0.109375	0.0712891	0.00537109	0.0571289	0.105469
-16.7	-0.0717773	0.0185547	0.109375	0.0756836	0.0078125	0.0478516	0.12793
-16.6	-0.0610352	0.0249023	0.113281	0.0859375	0.0185547	0.0571289	0.136719
-16.5	-0.0561523	0.0249023	0.127441	0.0991211	0.0234375	0.0571289	0.143555
-16.4	-0.0634766	0.0239258	0.120117	0.0991211	0.0185547	0.0561523	0.134277
-16.3	-0.0639648	0.0234375	0.117188	0.0908203	0.0366211	0.0463867	0.132813
-16.2	-0.0522461	0.0351563	0.117188	0.0976563	0.0366211	0.0507813	0.126465
-16.1	-0.0390625	0.046875	0.119629	0.117188	0.0390625	0.0595703	0.12793
-16	-0.03125	0.0576172	0.128906	0.135254	0.0483398	0.0664063	0.132813
-15.9	-0.015625	0.0639648	0.126465	0.132813	0.0522461	0.0595703	0.131836
-15.8	-0.0131836	0.0664063	0.119629	0.134277	0.0703125	0.0712891	0.125
-15.7	-0.00390625	0.0771484	0.128906	0.140625	0.0678711	0.0795898	0.134277
-15.6	-0.00244141	0.078125	0.127441	0.140625	0.0693359	0.0766602	0.135742
-15.5	0.00390625	0.0874023	0.11084	0.140625	0.0756836	0.0673828	0.14209
-15.4	0.00634766	0.0913086	0.117188	0.143066	0.0703125	0.0908203	0.144531
-15.3	0.0185547	0.108398	0.118652	0.153809	0.0825195	0.0898438	0.155273
-15.2	0.0297852	0.101563	0.125977	0.160156	0.0976563	0.09375	0.171875
-15.1	0.00927734	0.0834961	0.118652	0.148438	0.0952148	0.0751953	0.14209
-15	0.00488281	0.0874023	0.127441	0.150879	0.100098	0.0869141	0.144531
-14.9	0.0273438	0.105469	0.136719	0.160156	0.120117	0.10791	0.147461
-14.8	0.03125	0.103027	0.126465	0.149902	0.114746	0.0952148	0.14209
-14.7	0.0351563	0.104492	0.135254	0.158691	0.106934	0.0947266	0.152344
-14.6	0.0493164	0.106934	0.144531	0.154785	0.130371	0.100098	0.153809
-14.5	0.0419922	0.0888672	0.144531	0.147461	0.103027	0.0859375	0.155273
-14.4	0.0351563	0.0664063	0.14209	0.135254	0.100586	0.0883789	0.15918
-14.3	0.0102539	0.0625	0.119629	0.121094	0.0820313	0.0556641	0.144531
-14.2	0	0.0444336	0.128906	0.118652	0.0732422	0.0649414	0.153809
-14.1	-0.0219727	0.043457	0.130371	0.0991211	0.0639648	0.0742188	0.155273
-14	-0.0102539	0.0405273	0.134277	0.104004	0.0615234	0.0649414	0.169434
-13.9	-0.0170898	0.0405273	0.123535	0.0976563	0.0522461	0.0625	0.161621
-13.8	-0.0078125	0.0429688	0.119629	0.100098	0.0546875	0.0556641	0.164063
-13.7	-0.0078125	0.0498047	0.126465	0.101563	0.0664063	0.0712891	0.181152
-13.6	-0.0195313	0.0288086	0.105469	0.0874023	0.0639648	0.0532227	0.169434
-13.5	-0.0195313	0.0273438	0.104004	0.078125	0.0756836	0.0546875	0.169434
-13.4	-0.0209961	0.0209961	0.105469	0.078125	0.0756836	0.0610352	0.169434
-13.3	-0.0273438	0.0131836	0.105469	0.0805664	0.0756836	0.0634766	0.181152
-13.2	-0.0131836	0.0249023	0.109375	0.100098	0.078125	0.0751953	0.182129
-13.1	-0.00634766	0.0327148	0.125	0.101563	0.0952148	0.0844727	0.185059
-13	-0.0219727	0.0263672	0.118652	0.0952148	0.0888672	0.0756836	0.178711
-12.9	-0.0078125	0.0327148	0.125	0.101563	0.0966797	0.0751953	0.185059
-12.8	-0.0078125	0.0327148	0.125	0.0898438	0.113281	0.0820313	0.170898
-12.7	-0.0078125	0.03125	0.125	0.0898438	0.106934	0.0751953	0.161621
-12.6	-0.0078125	0.0249023	0.117188	0.0898438	0.106934	0.0844727	0.153809
-12.5	-0.0078125	0.0263672	0.125	0.0913086	0.108398	0.0844727	0.153809
-12.4	-0.00927734	0.0297852	0.123535	0.0961914	0.113281	0.0830078	0.152344
-12.3	-0.0180664	0.0170898	0.117188	0.0820313	0.105469	0.0766602	0.151367
-12.2	-0.0375977	0.00683594	0.105469	0.0717773	0.0888672	0.0664063	0.131836
-12.1	-0.03125	0.00146484	0.105469	0.0766602	0.0952148	0.0727539	0.138184
-12	-0.03125	0.00146484	0.106934	0.0703125	0.0952148	0.0727539	0.138184
-11.9	-0.03125	0.00146484	0.113281	0.0703125	0.0952148	0.0727539	0.138184
-11.8	-0.0327148	0.00146484	0.113281	0.0703125	0.0927734	0.0727539	0.138184
-11.7	-0.0390625	-0.000976563	0.113281	0.0585938	0.0913086	0.0727539	0.149902
-11.6	-0.0390625	-0.0102539	0.115723	0.0585938	0.0913086	0.0869141	0.149902
-11.5	-0.0390625	-0.0102539	0.122559	0.0585938	0.09375	0.0961914	0.149902
-11.4	-0.0390625	-0.0117188	0.113281	0.0585938	0.103027	0.0844727	0.149902
-11.3	-0.0273438	-0.00488281	0.113281	0.0585938	0.0952148	0.0820313	0.138184
-11.2	-0.0390625	-0.0117188	0.113281	0.0585938	0.0952148	0.0727539	0.138184
-11.1	-0.0366211	-0.015625	0.115723	0.0610352	0.0976563	0.0751953	0.140625
-11	-0.0273438	-0.00634766	0.125	0.0703125	0.106934	0.0844727	0.149902
-10.9	-0.0273438	-0.00634766	0.125	0.0703125	0.106934	0.0844727	0.140625
-10.8	-0.0273438	-0.00634766	0.117188	0.0703125	0.106934	0.0844727	0.134277
-10.7	-0.0273438	-0.00634766	0.115723	0.0703125	0.104492	0.0961914	0.14209
-10.6	-0.0180664	-0.00634766	0.109375	0.0703125	0.0834961	0.09375	0.14209
-10.5	-0.0273438	-0.00878906	0.109375	0.0703125	0.0952148	0.0844727	0.139648
-10.4	-0.0273438	-0.0180664	0.109375	0.0703125	0.0952148	0.0844727	0.130371
-10.3	-0.0366211	-0.0258789	0.109375	0.0625	0.0756836	0.0791016	0.121094
-10.2	-0.0429688	-0.0258789	0.101563	0.0625	0.0874023	0.0883789	0.114746
-10.1	-0.0429688	-0.0336914	0.101563	0.0625	0.0874023	0.0883789	0.114746
-10	-0.0429688	-0.0336914	0.0991211	0.0507813	0.0874023	0.0883789	0.126465
-9.9	-0.0415039	-0.0322266	0.0913086	0.0522461	0.0952148	0.0898438	0.12793
-9.8	-0.0366211	-0.0390625	0.0961914	0.0546875	0.09375	0.0947266	0.132813
-9.7	-0.0415039	-0.0439453	0.0795898	0.0405273	0.0888672	0.0898438	0.12793
-9.6	-0.0366211	-0.0390625	0.0961914	0.0478516	0.09375	0.0947266	0.132813
-9.5	-0.0415039	-0.0439453	0.0913086	0.0444336	0.090332	0.0898438	0.12793
-9.4	-0.0351563	-0.0375977	0.0976563	0.0483398	0.114746	0.0961914	0.134277
-9.3	-0.046875	-0.0351563	0.100098	0.0415039	0.103027	0.0961914	0.143555
-9.2	-0.0375977	-0.0336914	0.109375	0.0507813	0.101563	0.0961914	0.134277
-9.1	-0.046875	-0.0336914	0.109375	0.0507813	0.0952148	0.0961914	0.134277
-9	-0.0390625	-0.0258789	0.117188	0.0585938	0.103027	0.0922852	0.14209
-8.9	-0.0390625	-0.0258789	0.117188	0.0585938	0.114746	0.0922852	0.149902
-8.8	-0.0390625	-0.0258789	0.117188	0.0600586	0.114746	0.0922852	0.149902
-8.7	-0.0390625	-0.0258789	0.118652	0.0664063	0.114746	0.0922852	0.149902
-8.6	-0.03125	-0.0375977	0.125	0.0664063	0.112305	0.0844727	0.149902
-8.5	-0.0366211	-0.0351563	0.137695	0.0688477	0.105469	0.0869141	0.150879
-8.4	-0.0273438	-0.0258789	0.15625	0.0859375	0.114746	0.0961914	0.165527
-8.3	-0.0273438	-0.0258789	0.15625	0.0859375	0.103027	0.0961914	0.165527
-8.2	-0.0273438	-0.0258789	0.15625	0.0859375	0.103027	0.0844727	0.153809
-8.1	-0.0273438	-0.0258789	0.15625	0.0961914	0.101563	0.0844727	0.153809
-8	-0.0297852	-0.0283203	0.153809	0.0874023	0.0927734	0.0820313	0.151367
-7.9	-0.0390625	-0.0493164	0.144531	0.0795898	0.0834961	0.0727539	0.153809
-7.8	-0.0366211	-0.0493164	0.15625	0.0859375	0.0834961	0.0727539	0.14209
-7.7	-0.0390625	-0.0493164	0.15625	0.0844727	0.0834961	0.0727539	0.14209
-7.6	-0.0390625	-0.0556641	0.15625	0.078125	0.0810547	0.0727539	0.14209
-7.5	-0.0390625	-0.0493164	0.15625	0.078125	0.0717773	0.0727539	0.14209
-7.4	-0.0273438	-0.0493164	0.15625	0.0795898	0.0717773	0.0610352	0.14209
-7.3	-0.0273438	-0.0493164	0.157715	0.0976563	0.0717773	0.0610352	0.14209
-7.2	-0.0273438	-0.0493164	0.164063	0.0976563	0.0717773	0.0610352	0.14209
-7.1	-0.0273438	-0.0493164	0.164063	0.0976563	0.0639648	0.0610352	0.14209
-7	-0.0273438	-0.0493164	0.164063	0.0976563	0.0639648	0.0610352	0.153809
-6.9	-0.0273438	-0.046875	0.171875	0.0976563	0.0639648	0.0610352	0.14209
-6.8	-0.0273438	-0.0400391	0.171875	0.0859375	0.0639648	0.0610352	0.153809
-6.7	-0.0273438	-0.0493164	0.183594	0.0859375	0.0639648	0.0610352	0.153809
-6.6	-0.0273438	-0.0493164	0.183594	0.0859375	0.0639648	0.0610352	0.153809
-6.5	-0.0273438	-0.046875	0.183594	0.0844727	0.0639648	0.0610352	0.153809
-6.4	-0.0273438	-0.0375977	0.183594	0.0913086	0.0639648	0.0610352	0.153809
-6.3	-0.0234375	-0.0351563	0.188477	0.0986328	0.0664063	0.0556641	0.15625
-6.2	-0.0078125	-0.0258789	0.207031	0.103027	0.0756836	0.0649414	0.165527
-6.1	-0.0078125	-0.0244141	0.207031	0.117188	0.0756836	0.0649414	0.165527
-6	-0.0078125	-0.0180664	0.20459	0.117188	0.0756836	0.0649414	0.165527
-5.9	0	-0.0180664	0.195313	0.117188	0.0756836	0.0649414	0.165527
-5.8	0	-0.0180664	0.195313	0.117188	0.0756836	0.0673828	0.165527
-5.7	-0.00146484	-0.015625	0.195313	0.117188	0.0756836	0.0742188	0.165527
-5.6	-0.0078125	-0.00634766	0.195313	0.109375	0.0639648	0.0649414	0.165527
-5.5	-0.0078125	-0.00634766	0.203125	0.109375	0.0639648	0.0649414	0.165527
-5.4	-0.00634766	-0.00390625	0.195313	0.0976563	0.0639648	0.0673828	0.163086
-5.3	0	-0.00634766	0.195313	0.0976563	0.0639648	0.0766602	0.153809
-5.2	0	0.00537109	0.195313	0.0976563	0.0639648	0.0844727	0.153809
-5.1	-0.00244141	-0.00878906	0.195313	0.0952148	0.0615234	0.0834961	0.151367
-5	0.00244141	-0.0126953	0.207031	0.0976563	0.0639648	0.0908203	0.161621
-4.9	0.00390625	-0.00634766	0.207031	0.0976563	0.0639648	0.0766602	0.161621
-4.8	0.00390625	-0.00634766	0.207031	0.0859375	0.0639648	0.0766602	0.153809
-4.7	0.00146484	-0.00634766	0.214844	0.078125	0.0639648	0.0766602	0.14209
-4.6	-0.0078125	-0.00634766	0.214844	0.078125	0.0615234	0.0649414	0.14209
-4.5	-0.00927734	0.00146484	0.222656	0.0859375	0.0522461	0.0727539	0.144531
-4.4	0	0.00146484	0.234375	0.0859375	0.0522461	0.0742188	0.153809
-4.3	-0.0078125	-0.00634766	0.229004	0.0883789	0.0327148	0.0727539	0.134277
-4.2	-0.0078125	-0.00634766	0.238281	0.0976563	0.0327148	0.0712891	0.134277
-4.1	0.00390625	-0.00634766	0.238281	0.109375	0.03125	0.0649414	0.134277
-4	0.00927734	0.00146484	0.246094	0.117188	0.0327148	0.0727539	0.14209
-3.9	0.00244141	0.00390625	0.248535	0.119629	0.0234375	0.0751953	0.132813
-3.8	0.0141602	0.015625	0.255371	0.114746	0.0249023	0.0766602	0.139648
-3.7	0.0351563	0.0249023	0.257813	0.117188	0.0249023	0.078125	0.134277
-3.6	0.0351563	0.0146484	0.257813	0.117188	0.0170898	0.0766602	0.122559
-3.5	0.03125	0.00146484	0.253906	0.119629	0.0249023	0.0727539	0.122559
-3.4	0.0351563	0.015625	0.246094	0.126465	0.0249023	0.0844727	0.117188
-3.3	0.0234375	0.00537109	0.238281	0.109375	0.0249023	0.0844727	0.112305
-3.2	0.0273438	0.0170898	0.238281	0.109375	0.0302734	0.0961914	0.109375
-3.1	0.0234375	0.0146484	0.226563	0.10791	0.0327148	0.104004	0.114746
-3	0.0351563	0.0249023	0.230469	0.101563	0.046875	0.115723	0.138184
-2.9	0.0327148	0.0405273	0.23584	0.0991211	0.0708008	0.132813	0.143555
-2.8	0.0209961	0.0249023	0.212402	0.078125	0.0522461	0.123535	0.131836
-2.7	0.0219727	0.0366211	0.205566	0.0805664	0.0429688	0.133789	0.132813
-2.6	0.03125	0.0507813	0.203125	0.078125	0.0507813	0.143066	0.14209
-2.5	0.0234375	0.0458984	0.213379	0.0898438	0.0444336	0.143066	0.14209
-2.4	0.0415039	0.0639648	0.21875	0.109375	0.0615234	0.162598	0.153809
-2.3	0.0351563	0.0483398	0.20459	0.101563	0.0444336	0.172852	0.152344
-2.2	0.0429688	0.0444336	0.197754	0.106934	0.0522461	0.183594	0.153809
-2.1	0.0341797	0.0458984	0.209961	0.0898438	0.0561523	0.167969	0.166992
-2	0.0375977	0.046875	0.213379	0.0649414	0.0507813	0.180664	0.181152
-1.9	0.0234375	0.0249023	0.207031	0.0820313	0.0561523	0.171875	0.181152
-1.8	0.00537109	0.00683594	0.175781	0.0639648	0.0356445	0.171875	0.155273
-1.7	0.0336914	0.0170898	0.195313	0.0898438	0.0390625	0.180664	0.161621
-1.6	0.0219727	0.0117188	0.20166	0.121094	0.0390625	0.168945	0.15625
-1.5	0.00537109	0.00927734	0.21875	0.109375	0.0600586	0.183594	0.178711
-1.4	-0.0454102	-0.00878906	0.216309	0.109375	0.0458984	0.172852	0.171875
-1.3	-0.0585938	-0.0415039	0.197754	0.113281	0.0444336	0.160156	0.147461
-1.2	-0.0561523	-0.0595703	0.212402	0.132813	0.0498047	0.176758	0.131836
-1.1	-0.0351563	-0.0898438	0.262695	0.161133	0.0336914	0.180664	0.119629
-1	0.0258789	-0.0688477	0.289063	0.212402	0.0576172	0.1875	0.149902
-0.9	0.0239258	-0.0737305	0.264648	0.230469	0.0864258	0.179688	0.163086
-0.8	0.0322266	-0.0561523	0.283691	0.268066	0.10791	0.175293	0.183594
-0.7	0.0546875	-0.0322266	0.275879	0.247559	0.0849609	0.175781	0.212402
-0.6	0.0727539	-0.00390625	0.324219	0.252441	0.104004	0.225098	0.203125
-0.5	0.0351563	-0.0283203	0.269531	0.243652	0.0693359	0.17041	0.143555
-0.4	0.0576172	-0.0507813	0.256836	0.257813	0.0966797	0.164063	0.139648
-0.3	0.0493164	-0.0400391	0.222656	0.242188	0.0756836	0.133789	0.118652
-0.2	0.0703125	-0.0141602	0.164063	0.196777	0.0561523	0.0756836	0.126465
-0.1	0.00390625	-0.0327148	0.0546875	0.0874023	0.0131836	0.0126953	0.0561523
7.11e-15	0	0	0.0234375	0.0141602	0	0.0126953	0
0.099999	-0.074707	-0.0493164	0	0	-0.0561523	0	-0.0380859
0.199997	-0.078125	-0.244629	0.107422	0.128906	-0.0942383	0.0610352	-0.0673828
0.299999	-0.0859375	-0.27002	0.146484	0.160156	-0.0844727	0.0161133	-0.0844727
0.399998	-0.0996094	-0.252441	0.132813	0.162109	-0.0771484	0.0556641	-0.0844727
0.5	-0.159668	-0.283203	0.0961914	0.14502	-0.151855	0.0258789	-0.0957031
0.599998	-0.0981445	-0.227539	0.0952148	0.151855	-0.114258	0.0493164	-0.0302734
0.699997	-0.126465	-0.220215	0.0976563	0.17041	-0.105469	0.105957	-0.0351563
0.799999	-0.121094	-0.102539	0.125	0.181152	-0.0244141	0.09375	0.00292969
0.899998	-0.118652	-0.0913086	0.0913086	0.0834961	-0.121094	-0.0380859	-0.0078125
1	-0.196289	-0.0463867	0.0444336	-0.0180664	-0.0361328	-0.0595703	-0.0166016
1.1*	-0.156738	-0.0249023	-0.00146484	-0.043457	-0.0927734	0.00732422	-0.138184
1.2*	-0.134766	-0.371094	0.259766	0.364258	-0.119629	-0.0644531	0.0737305
1.3*	0.03125	0.677246	0.785156	0.521973	-0.0273438	0.0297852	0.873047
1.4*	0.831543	4.18506	-1.67236	-1.76807	1.78613	0.199219	9.60693
1.5*	1.42188	6.03271	-6.92139	-7.62646	6.37891	5.03027	27.9678
1.6*	1.04834	4.61865	-8.02832	-8.27051	9.93896	14.1982	40.189
1.7*	0.233398	1.61475	-3.29492	-1.89063	8.78857	18.3188	29.2749
1.8*	0.358398	0.881836	0.788086	3.46729	6.60547	12.9624	20.5771
1.9*	0.128906	0.381836	2.16162	4.36377	6.5835	11.8696	21.8428
2*	0.339844	0.500977	3.17969	5.3335	8.125	14.2441	26.2969
2.1*	0.912598	1.27832	3.95166	6.21094	10.3438	18.248	31.4219
2.2*	0.814453	1.55029	3.66943	6.41406	12.3716	21.6826	35.5044
2.3	0.87793	2.08887	3.74268	6.58496	14.4067	25.292	38.6167
2.4	1.19434	2.44873	3.72656	7.34033	16.6167	28.8389	41.1479
2.5	1.0166	2.40332	3.59131	7.63037	18.7031	31.6963	43.1025
2.6	1.26611	3.03076	4.3125	8.75195	20.7827	34.7563	44.6831
2.7	1.48584	3.2124	4.80713	9.86328	22.7793	36.9424	46.1592
2.8	1.80566	3.58984	5.18359	11.1421	24.749	38.9712	47.5142
2.9	1.98438	3.93945	5.80322	12.1484	26.6084	40.8555	48.5723
3	2.07373	4.2002	6.4502	13.2197	28.415	42.2769	49.4116
3.1	2.0332	4.34766	7.06836	14.2051	29.9019	43.4097	50.0479
3.2	2.0752	4.60938	7.66406	15.2305	31.3735	44.3364	50.7471
3.3	2.1499	4.75146	8.20068	16.2339	32.7412	44.8652	51.1274
3.4	2.26416	4.96631	8.66797	17.2305	34.082	45.5063	51.543
3.5	2.44531	5.2334	9.22656	18.2847	35.2959	46.1836	52.0571
3.6	2.65234	5.48438	9.78516	19.1938	36.353	46.7627	52.478
3.7	2.82959	5.72559	10.3101	20.1655	37.2827	47.2124	52.8623
3.8	2.9541	5.97656	10.8267	21.1665	38.0195	47.6665	53.2007
3.9	3.04834	6.20215	11.3438	22.1211	38.8311	48.022	53.4819
4	3.16162	6.42188	11.8218	23.0601	39.6592	48.3149	53.7476
4.1	3.22656	6.65527	12.2813	23.9087	39.9546	48.5483	54.0068
4.2	3.30615	6.88428	12.7046	24.6953	40.4873	48.7588	54.1611
4.3	3.42432	7.13428	13.2134	25.4517	40.9336	48.9658	54.2485
4.4	3.57275	7.38428	13.728	26.2788	41.4131	49.2241	54.3989
4.5	3.6875	7.63916	14.2432	26.9946	41.8086	49.437	54.5767
4.6	3.82275	7.90771	14.75	27.7109	42.2695	49.6782	54.7646
4.7	3.90771	8.13574	15.1382	28.2529	42.5435	49.875	54.9053
4.8	4.03271	8.39355	15.5938	28.9258	42.8022	50.0977	55.0864
4.9	4.11719	8.59521	16.0337	29.5103	43.0078	50.2666	55.2017
5	4.20459	8.81787	16.4482	30.124	43.2388	50.3711	55.2568
5.1	4.29541	9.05859	16.8228	30.6416	43.4531	50.3892	55.3452
5.2	4.44775	9.29297	17.2627	31.1626	43.6641	50.5322	55.4844
5.3	4.58984	9.49756	17.7305	31.6211	43.8701	50.6235	55.6343
5.4	4.67578	9.74756	18.1694	32.1108	44.0132	50.7305	55.7437
5.5	4.79053	9.95605	18.5234	32.5703	44.1694	50.7993	55.8076
5.6	4.90625	10.124	18.896	32.9741	44.2983	50.8853	55.8921
5.7	5.06494	10.353	19.3008	33.3633	44.4897	50.9961	56.0205
5.8	5.1499	10.5249	19.7031	33.6094	44.5913	51.0518	56.0977
5.9	5.26416	10.7344	20.0767	33.9375	44.7085	51.1572	56.1577
6	5.396	10.9507	20.3857	34.2397	44.8584	51.2617	56.1982
6.1	5.52979	11.1812	20.7031	34.522	45.0015	51.3618	56.2578
6.2	5.6499	11.3491	21.0117	34.7759	45.1094	51.4541	56.2998
6.3	5.75244	11.5483	21.3281	35.0835	45.2397	51.5234	56.353
6.4	5.86475	11.7607	21.625	35.3594	45.353	51.5703	56.3906
6.5	5.98682	11.9155	21.9414	35.5742	45.4312	51.6025	56.439
6.6	6.10156	12.0977	22.2617	35.8501	45.5273	51.6938	56.5171
6.7	6.1665	12.3101	22.5439	36.0078	45.6187	51.7588	56.5625
6.8	6.26709	12.5015	22.8608	36.1709	45.7046	51.8242	56.6475
6.9	6.36963	12.707	23.1655	36.3813	45.7686	51.8721	56.7305
7	6.47021	12.8999	23.4321	36.5742	45.8438	51.9321	56.7773
7.1	6.5625	13.0796	23.7539	36.7617	45.9351	52.0078	56.8662
7.2	6.67188	13.2788	24.0298	36.9531	46.0093	52.0884	56.939
7.3	6.77881	13.4912	24.3296	37.1392	46.0991	52.1602	57.021
7.4	6.87891	13.6616	24.5547	37.2891	46.1201	52.2041	57.0693
7.5	6.96338	13.8374	24.8008	37.4272	46.1655	52.2837	57.1133
7.6	7.09131	14.0522	25.0142	37.6016	46.2725	52.3945	57.2046
7.7	7.21631	14.2578	25.2241	37.7656	46.3398	52.4453	57.2451
7.8	7.2915	14.4116	25.4141	37.8828	46.3921	52.4619	57.2539
7.9	7.3999	14.5811	25.5952	37.9961	46.4546	52.5142	57.3115
8	7.49072	14.7305	25.7783	38.0991	46.5132	52.5532	57.3413
8.1	7.5874	14.8701	25.9546	38.1938	46.5474	52.5688	57.3608
8.2	7.68066	15.022	26.1377	38.2695	46.5688	52.5884	57.3867
8.3	7.75146	15.1841	26.3154	38.3462	46.5928	52.604	57.396
8.4	7.83838	15.3477	26.4805	38.4453	46.6406	52.6455	57.4233
8.5	7.91406	15.4976	26.6577	38.5562	46.7021	52.6704	57.4497
8.6	8.02881	15.6201	26.832	38.6421	46.7412	52.7148	57.4805
8.7	8.08838	15.7422	26.9907	38.6768	46.7407	52.7417	57.4922
8.8	8.14355	15.8638	27.1499	38.7412	46.7764	52.7593	57.5225
8.9	8.24707	16.0078	27.354	38.8071	46.8413	52.8306	57.6108
9	8.29053	16.1147	27.4897	38.8711	46.8428	52.8643	57.6123
9.1	8.37109	16.2539	27.6641	38.939	46.8789	52.9126	57.6523
9.2	8.47266	16.4131	27.8267	39.0156	46.9155	52.9478	57.6826
9.3	8.57031	16.5508	27.9648	39.0703	46.9624	52.9727	57.7319
9.4	8.62354	16.6577	28.0859	39.1196	46.978	52.9956	57.7617
9.5	8.70215	16.7544	28.1904	39.1592	46.9951	53.0146	57.7842
9.6	8.77197	16.8906	28.3032	39.186	47.0234	53.0542	57.8125
9.7	8.82178	17.0132	28.4063	39.2266	47.0366	53.0767	57.8115
9.8	8.91406	17.1436	28.542	39.2788	47.085	53.125	57.8506
9.9	8.99219	17.2461	28.6455	39.3228	47.1108	53.147	57.8765
10	9.05078	17.3491	28.7383	39.3594	47.1421	53.1572	57.9023
10.1	9.1499	17.4521	28.8374	39.4272	47.1616	53.1523	57.9624
10.2	9.21484	17.5366	28.9258	39.457	47.1772	53.1548	57.9756
10.3	9.29395	17.6421	29.0142	39.5039	47.2227	53.1821	58.0024
10.4	9.35303	17.7422	29.0718	39.5063	47.2139	53.1704	58.02
10.5	9.45313	17.874	29.1563	39.5835	47.2646	53.2056	58.0601
10.6	9.51563	17.9922	29.2383	39.6211	47.3032	53.2173	58.0923
10.7	9.57813	18.0771	29.3008	39.6328	47.3286	53.2422	58.1006
10.8	9.64453	18.146	29.3828	39.6548	47.354	53.2759	58.1343
10.9	9.70313	18.2202	29.4688	39.6733	47.3623	53.2837	58.1445
11	9.76416	18.3008	29.5337	39.7173	47.3569	53.3306	58.146
11.1	9.83643	18.3755	29.5991	39.7607	47.3623	53.3281	58.1514
11.2	9.8916	18.4844	29.6953	39.7852	47.3711	53.3423	58.1538
11.3	9.96484	18.582	29.7759	39.8096	47.3882	53.3721	58.1851
11.4	10.042	18.6943	29.8608	39.8804	47.4248	53.4023	58.2319
11.5	10.1064	18.7734	29.9619	39.897	47.4219	53.4268	58.2422
11.6	10.147	18.8545	29.999	39.9116	47.4233	53.4243	58.2593
11.7	10.2085	18.9351	30.0703	39.9609	47.4365	53.4556	58.2671
11.8	10.2671	18.9951	30.1484	39.9819	47.457	53.457	58.2959
11.9	10.332	19.0664	30.1875	40.022	47.4834	53.4814	58.3022
12	10.3799	19.1616	30.2471	40.0454	47.4844	53.4829	58.2813
12.1	10.4561	19.2607	30.3247	40.0718	47.5327	53.4937	58.3208
12.2	10.5283	19.3306	30.3657	40.1001	47.5522	53.5088	58.3501
12.3	10.6055	19.396	30.4385	40.1211	47.5952	53.5259	58.3843
12.4	10.6812	19.4717	30.4834	40.1563	47.6201	53.5596	58.4038
12.5	10.7266	19.5156	30.5078	40.1523	47.6445	53.5688	58.4248
12.6	10.7539	19.5562	30.5493	40.1523	47.6484	53.5742	58.4126
12.7	10.8335	19.6138	30.5952	40.1787	47.688	53.604	58.4341
12.8	10.8945	19.6772	30.5977	40.1719	47.689	53.6118	58.4468
12.9	10.9829	19.7617	30.6445	40.2266	47.7461	53.6523	58.4922
13	11.0483	19.8726	30.6851	40.2563	47.792	53.6807	58.5327
13.1	11.0532	19.9233	30.6963	40.2617	47.7852	53.6899	58.5444
13.2	11.1196	20.0156	30.7578	40.3032	47.8359	53.7339	58.5859
13.3	11.1563	20.0811	30.8062	40.3491	47.874	53.7344	58.6147
13.4	11.1851	20.1357	30.8296	40.3608	47.8857	53.7383	58.6255
13.5	11.2485	20.229	30.8799	40.3853	47.9297	53.7588	58.6509
13.6	11.2866	20.3247	30.9287	40.4116	47.9468	53.8086	58.6763
13.7	11.3516	20.3945	30.9282	40.4399	47.9688	53.8149	58.6953
13.8	11.4033	20.4648	31	40.4634	48.0288	53.8369	58.7188
13.9	11.4326	20.5327	31.0454	40.4858	48.064	53.8735	58.7217
14	11.4531	20.5952	31.0625	40.4805	48.0483	53.8774	58.7241
14.1	11.4922	20.6343	31.1069	40.5078	48.0654	53.8853	58.7632
14.2	11.5508	20.6826	31.1343	40.5469	48.0835	53.9023	58.7998
14.3	11.6016	20.7124	31.147	40.5366	48.0757	53.9126	58.8022
14.4	11.6499	20.7437	31.1968	40.5454	48.0928	53.9438	58.814
14.5	11.7017	20.8047	31.229	40.5703	48.0938	53.9854	58.832
14.6	11.7617	20.8428	31.2695	40.5991	48.124	54.0039	58.8506
14.7	11.8179	20.8804	31.2852	40.6157	48.1538	54.022	58.8608
14.8	11.8501	20.9312	31.3179	40.6289	48.1396	54.0234	58.8789
14.9	11.8931	20.9727	31.3579	40.6499	48.1523	54.062	58.8936
15	11.9492	21.0132	31.3633	40.6846	48.1704	54.0635	58.8984
15.1	11.9727	21.0303	31.3501	40.6772	48.1577	54.0366	58.8921
15.2	12.0234	21.0718	31.3789	40.6772	48.1748	54.0518	58.9038
15.3	12.0796	21.1226	31.3765	40.6875	48.1826	54.0649	58.9233
15.4	12.1108	21.1836	31.3921	40.7109	48.2046	54.0938	58.9351
15.5	12.1328	21.2153	31.3892	40.6851	48.2046	54.0962	58.9429
15.6	12.1899	21.2695	31.4219	40.6846	48.2085	54.104	58.9702
15.7	12.2202	21.3022	31.4155	40.6694	48.2241	54.0947	58.9741
15.8	12.2305	21.353	31.4453	40.6875	48.2319	54.104	58.9819
15.9	12.2734	21.396	31.4766	40.6968	48.2476	54.1157	59.0054
16	12.293	21.4351	31.4766	40.686	48.2334	54.0952	59.0132
16.1	12.3179	21.4741	31.4985	40.6992	48.2437	54.1118	59.0225
16.2	12.3447	21.5093	31.5195	40.7017	48.2578	54.126	59.0156
16.3	12.3921	21.5562	31.5405	40.7334	48.2671	54.1353	59.0225
16.4	12.4048	21.5796	31.5547	40.7446	48.2646	54.1235	59.021
16.5	12.4507	21.6226	31.6055	40.7773	48.2905	54.1431	59.0615
16.6	12.4736	21.6328	31.6182	40.7681	48.3149	54.1479	59.0845
16.7	12.4834	21.6396	31.6279	40.7671	48.3013	54.1445	59.0811
16.8	12.5117	21.6733	31.6523	40.7788	48.3022	54.1538	59.0835
16.9	12.5522	21.6851	31.668	40.8086	48.3257	54.1626	59.0835
17	12.5625	21.6943	31.6782	40.8203	48.3335	54.165	59.0835
17.1	12.5908	21.7188	31.707	40.8267	48.3398	54.1807	59.0796
17.2	12.6328	21.7397	31.7148	40.8413	48.3335	54.1743	59.0742
17.3	12.6553	21.7437	31.7383	40.8477	48.3569	54.1992	59.0825
17.4	12.686	21.7695	31.7656	40.8877	48.3726	54.2314	59.1001
17.5	12.6836	21.7671	31.7773	40.8921	48.3765	54.2368	59.0952
17.6	12.7227	21.7935	31.7969	40.9102	48.3936	54.2563	59.1084
17.7	12.7329	21.8149	31.8086	40.9102	48.397	54.2563	59.1108
17.8	12.7671	21.8569	31.8267	40.9243	48.4077	54.2759	59.1133
17.9	12.7813	21.8765	31.8203	40.9312	48.4067	54.2759	59.1084
18	12.8101	21.9067	31.8179	40.9414	48.4131	54.2866	59.1201
18.1	12.833	21.9204	31.8281	40.9297	48.415	54.2925	59.126
18.2	12.8491	21.9326	31.8359	40.918	48.4248	54.3125	59.1333
18.3	12.8843	21.9624	31.8359	40.9375	48.4365	54.3228	59.1226
18.4	12.9087	22.0054	31.8672	40.9609	48.4531	54.354	59.1538
18.5	12.9478	22.0249	31.8906	40.9805	48.4663	54.354	59.168
18.6	12.978	22.0522	31.8984	40.9727	48.4663	54.3657	59.1851
18.7	13.022	22.0742	31.9048	40.9985	48.478	54.3745	59.1953
18.8	13.0469	22.1069	31.9116	41.0117	48.4961	54.4102	59.21
18.9	13.0537	22.1255	31.9258	41.0225	48.498	54.4258	59.2256
19	13.0649	22.146	31.917	41.0298	48.4819	54.4243	59.2139
19.1	13.103	22.1733	31.9282	41.0522	48.4937	54.436	59.2437
19.2	13.1392	22.1797	31.9556	41.0688	48.5063	54.4531	59.2524
19.3	13.1548	22.1943	31.9648	41.0664	48.5122	54.4517	59.2725
19.4	13.1836	22.2109	31.9688	41.0781	48.5117	54.4424	59.2813
19.5	13.2148	22.2188	31.9883	41.082	48.5078	54.4478	59.2881
19.6	13.2217	22.2334	31.9741	41.0874	48.5146	54.4243	59.2905
19.7	13.251	22.2437	31.979	41.0894	48.5063	54.436	59.3032
19.8	13.2759	22.2539	31.9985	41.103	48.5161	54.4463	59.2959
19.9	13.3154	22.2959	32.0171	41.1187	48.5225	54.4648	59.3257
20	13.3423	22.3047	32.0195	41.1211	48.5259	54.4673	59.3374
20.1	13.3506	22.313	32.0342	41.1289	48.5435	54.4634	59.3403
20.2	13.3657	22.3203	32.0415	41.1289	48.5508	54.4829	59.3501
20.3	13.3735	22.3335	32.0469	41.1367	48.5469	54.4946	59.374
20.4	13.4126	22.353	32.0557	41.1494	48.5732	54.4932	59.3789
20.5	13.4326	22.3701	32.0874	41.1685	48.5811	54.4937	59.3921
20.6	13.4727	22.3867	32.0913	41.168	48.603	54.5166	59.417
20.7	13.4907	22.4155	32.1055	41.1689	48.6157	54.522	59.4414
20.8	13.4976	22.4272	32.1172	41.1733	48.6255	54.5273	59.4482
20.9	13.5234	22.4341	32.1367	41.189	48.6343	54.5337	59.4546
21	13.5415	22.4517	32.1548	41.1978	48.6523	54.5518	59.4702
21.1	13.5562	22.4756	32.1499	41.2007	48.646	54.5586	59.4766
21.2	13.5728	22.4922	32.1548	41.208	48.6577	54.5635	59.4937
21.3	13.5835	22.4937	32.1592	41.2202	48.6631	54.5649	59.5029
21.4	13.6016	22.5132	32.1743	41.2188	48.6733	54.5742	59.5015
21.5	13.5991	22.5225	32.1758	41.2163	48.6826	54.5625	59.521
21.6	13.6025	22.5249	32.1758	41.1992	48.6821	54.5542	59.5195
21.7	13.624	22.5469	32.1899	41.2095	48.6865	54.5649	59.5186
21.8	13.6299	22.564	32.2046	41.2368	48.7109	54.5845	59.5352
21.9	13.6553	22.5732	32.2188	41.2412	48.7163	54.5938	59.5562
22	13.6782	22.5845	32.2251	41.2588	48.7217	54.5923	59.5718
22.1	13.686	22.5967	32.2319	41.2632	48.7358	54.6064	59.5757
22.2	13.7217	22.624	32.2461	41.2749	48.7515	54.6211	59.5825
22.3	13.7407	22.6523	32.2446	41.2695	48.7734	54.6221	59.6001
22.4	13.7554	22.6475	32.2515	41.272	48.7686	54.6289	59.6045
22.5	13.79	22.6743	32.2656	41.2993	48.7813	54.6416	59.6289
22.6	13.8037	22.6841	32.2852	41.2998	48.7739	54.6343	59.624
22.7	13.8188	22.6875	32.2915	41.3057	48.7798	54.6519	59.6484
22.8	13.8281	22.7021	32.3062	41.3179	48.7959	54.6758	59.6523
22.9	13.8281	22.7148	32.2993	41.3149	48.7944	54.6572	59.6475
23	13.853	22.7334	32.3193	41.3286	48.7866	54.6772	59.6528
23.1	13.8501	22.7319	32.3228	41.3252	48.8062	54.6831	59.6484
23.2	13.8672	22.7422	32.3281	41.3438	48.8242	54.7095	59.6665
23.3	13.875	22.7412	32.3477	41.3594	48.8169	54.7163	59.6841
23.4	13.9023	22.7515	32.3555	41.3789	48.8228	54.7222	59.6821
23.5	13.8999	22.749	32.3672	41.3765	48.8232	54.7227	59.6841
23.6	13.9141	22.7539	32.3804	41.3828	48.8271	54.7266	59.6929
23.7	13.9297	22.771	32.3955	41.4165	48.8398	54.7549	59.7007
23.8	13.9424	22.772	32.4102	41.4102	48.832	54.7651	59.7017
23.9	13.9561	22.7778	32.396	41.4102	48.8247	54.7671	59.7021
24	13.9619	22.793	32.4048	41.418	48.8345	54.7822	59.7124
24.1	13.9873	22.8062	32.3975	41.4429	48.8467	54.7866	59.7178
24.2	13.9985	22.814	32.4048	41.458	48.8452	54.7808	59.7305
24.3	14.0054	22.8115	32.4233	41.4521	48.8428	54.7827	59.7114
24.4	14.0103	22.8164	32.415	41.4556	48.8335	54.7729	59.707
24.5	14.021	22.8296	32.4155	41.4468	48.8516	54.7813	59.7109
24.6	14.0259	22.8271	32.418	41.4517	48.8584	54.7861	59.7061
24.7	14.0327	22.8335	32.4102	41.4585	48.8726	54.8047	59.7031
24.8	14.0313	22.8413	32.418	41.4517	48.8672	54.8047	59.7124
24.9	14.0508	22.8701	32.4351	41.4858	48.9014	54.8291	59.7217
25	14.0493	22.8618	32.4268	41.4673	48.8828	54.8228	59.7148
25.1	14.0537	22.874	32.4404	41.4805	48.8872	54.8345	59.7349
25.2	14.0635	22.8726	32.4438	41.4922	48.8931	54.8462	59.7407
25.3	14.0757	22.8843	32.439	41.5015	48.8975	54.8564	59.7451
25.4	14.103	22.8804	32.4531	41.5078	48.9092	54.8647	59.7515
25.5	14.1221	22.896	32.457	41.5195	48.9165	54.8745	59.7632
25.6	14.1445	22.9023	32.4658	41.5283	48.9326	54.8735	59.772
25.7	14.1616	22.9067	32.4795	41.542	48.9272	54.896	59.7778
25.8	14.1758	22.9141	32.479	41.5415	48.9365	54.9033	59.7842
25.9	14.1875	22.9131	32.4858	41.5483	48.9507	54.9048	59.7891
26	14.1938	22.9102	32.4829	41.5352	48.9438	54.9126	59.793
26.1	14.2007	22.9038	32.4702	41.5391	48.9458	54.9141	59.8013
26.2	14.2031	22.9155	32.4868	41.5376	48.9531	54.9331	59.8032
26.3	14.2236	22.9375	32.4766	41.5391	48.957	54.9438	59.8022
26.4	14.2373	22.9561	32.4883	41.543	48.9756	54.9531	59.814
26.5	14.2383	22.9521	32.4858	41.5483	48.9717	54.9556	59.8115
26.6	14.2241	22.9453	32.4766	41.5298	48.957	54.958	59.8022
26.7	14.2407	22.9717	32.4937	41.5601	48.9951	54.9844	59.814
26.8	14.2422	22.9688	32.4854	41.5493	48.9946	54.9854	59.8218
26.9	14.2539	22.9653	32.4858	41.5679	49.0083	55.0054	59.8335
27	14.2734	22.9829	32.4961	41.5586	49.0132	55.0347	59.8438
27.1	14.2852	22.9937	32.5063	41.5664	49.0234	55.0337	59.8491
27.2	14.3032	23.0078	32.5195	41.561	49.0483	55.0376	59.8647
27.3	14.3203	23.0303	32.5415	41.582	49.0586	55.0596	59.8789
27.4	14.353	23.0444	32.5615	41.5938	49.0864	55.0796	59.895
27.5	14.3657	23.0547	32.5781	41.6016	49.104	55.083	59.9063
27.6	14.3843	23.0483	32.5767	41.6108	49.1084	55.0859	59.9141
27.7	14.4023	23.0747	32.5967	41.6289	49.1147	55.104	59.9341
27.8	14.4233	23.0718	32.5962	41.6382	49.1123	55.1133	59.9404
27.9	14.4111	23.0718	32.5859	41.6235	49.103	55.1011	59.9204
28	14.4312	23.0703	32.604	41.6274	49.1133	55.1157	59.9404
28.1	14.4346	23.0835	32.6094	41.6328	49.1133	55.1274	59.9517
28.2	14.4443	23.0835	32.6147	41.6396	49.1177	55.1328	59.9653
28.3	14.4438	23.0835	32.6055	41.6572	49.1157	55.1353	59.9727
28.4	14.4521	23.0952	32.6172	41.6592	49.1177	55.1431	59.9937
28.5	14.436	23.0811	32.6108	41.6548	49.1084	55.1406	59.9912
28.6	14.4414	23.0806	32.6143	41.6484	49.1001	55.1519	59.9897
28.7	14.4438	23.085	32.6187	41.6587	49.1045	55.1563	59.9922
28.8	14.4507	23.0928	32.6274	41.6577	49.1133	55.1611	60.0054
28.9	14.4517	23.0938	32.6304	41.6587	49.124	55.1758	60.0225
29	14.4609	23.1055	32.647	41.6797	49.1328	55.1831	60.0415
29.1	14.4521	23.106	32.6475	41.6733	49.146	55.1968	60.0381
29.2	14.4595	23.1016	32.6445	41.6851	49.1436	55.1914	60.042
29.3	14.4556	23.0977	32.6455	41.6768	49.1484	55.1831	60.0352
29.4	14.4639	23.106	32.646	41.6787	49.1577	55.1953	60.0444
29.5	14.4619	23.1118	32.6392	41.6885	49.1577	55.186	60.0444
29.6	14.4727	23.1123	32.6538	41.6992	49.1709	55.1938	60.0508
29.7	14.4639	23.1045	32.6382	41.7021	49.1538	55.1836	60.0435
29.8	14.4697	23.1304	32.6533	41.708	49.1641	55.1885	60.0483
29.9	14.4858	23.1328	32.6577	41.7124	49.1733	55.186	60.0522
30	14.4854	23.1367	32.6572	41.7212	49.1655	55.2056	60.061
30.1	14.4951	23.145	32.6733	41.728	49.167	55.2056	60.063
30.2	14.4946	23.1509	32.6797	41.7329	49.1743	55.2056	60.061
30.3	14.5015	23.1514	32.6797	41.7476	49.189	55.2056	60.0732
30.4	14.4922	23.1436	32.6851	41.7383	49.1958	55.2031	60.0522
30.5	14.4922	23.1626	32.6782	41.7407	49.1953	55.2041	60.064
30.6	14.4985	23.1709	32.6929	41.7671	49.2109	55.2314	60.0703
30.7	14.5054	23.1616	32.6836	41.7578	49.2153	55.2241	60.0654
30.8	14.5142	23.1616	32.6953	41.7603	49.2124	55.2197	60.0718
30.9	14.5234	23.1733	32.6963	41.7773	49.2134	55.2251	60.0859
31	14.5234	23.1733	32.7007	41.7788	49.2178	55.2251	60.0942
31.1	14.521	23.1694	32.7046	41.7954	49.2217	55.2227	60.0898
31.2	14.5337	23.1758	32.7095	41.8008	49.2266	55.2339	60.1055
31.3	14.543	23.1841	32.7163	41.8022	49.2437	55.2358	60.1162
31.4	14.5547	23.1821	32.7095	41.8086	49.2383	55.2339	60.125
31.5	14.5547	23.1851	32.7266	41.8188	49.2529	55.2344	60.1318
31.6	14.5537	23.1841	32.7202	41.8193	49.2451	55.2241	60.124
31.7	14.5518	23.1821	32.7266	41.8174	49.2524	55.2222	60.1328
31.8	14.5522	23.1826	32.7251	41.8179	49.2529	55.2368	60.1523
31.9	14.5415	23.1826	32.7188	41.8086	49.2437	55.2344	60.1343
32	14.5454	23.1743	32.7188	41.8213	49.2554	55.2261	60.1367
32.1	14.5537	23.1787	32.7188	41.8311	49.2554	55.2383	60.145
32.2	14.5493	23.1826	32.7266	41.8267	49.2632	55.2422	60.1523
32.3	14.5547	23.1743	32.7251	41.8203	49.2749	55.2354	60.146
32.4	14.5679	23.1958	32.7295	41.8335	49.2866	55.2681	60.1592
32.5	14.561	23.1821	32.7173	41.8423	49.2773	55.2563	60.1616
32.6	14.5562	23.1841	32.7256	41.8506	49.2974	55.2578	60.1616
32.7	14.5703	23.1812	32.7354	41.8579	49.3032	55.2642	60.1641
32.8	14.5688	23.1914	32.7358	41.8774	49.3037	55.2705	60.1709
32.9	14.5781	23.1865	32.729	41.8726	49.3101	55.2759	60.1655
33	14.5913	23.1914	32.7383	41.8774	49.3242	55.2759	60.1797
33.1	14.583	23.1875	32.7461	41.8813	49.3257	55.2759	60.1875
33.2	14.5967	23.2036	32.7476	41.8896	49.3271	55.2852	60.1982
33.3	14.5923	23.1914	32.7563	41.8906	49.3374	55.2822	60.1943
33.4	14.6226	23.2217	32.7749	41.9165	49.3623	55.3125	60.2124
33.5	14.6016	23.2017	32.7681	41.9102	49.3501	55.2939	60.2109
33.6	14.6108	23.2036	32.7852	41.918	49.3638	55.3032	60.2202
33.7	14.6182	23.2124	32.7852	41.918	49.3618	55.3149	60.2202
33.8	14.6123	23.2046	32.7881	41.9092	49.3662	55.3086	60.2139
33.9	14.6221	23.2148	32.7939	41.9189	49.3726	55.3228	60.2329
34	14.6226	23.2202	32.7944	41.9272	49.3828	55.3228	60.2334
34.1	14.6157	23.2188	32.7979	41.9204	49.3765	55.3237	60.2266
34.2	14.6304	23.2271	32.8101	41.9414	49.3882	55.3374	60.2349
34.3	14.6211	23.2305	32.8257	41.9468	49.3936	55.333	60.2319
34.4	14.6313	23.2241	32.8149	41.9399	49.3867	55.3369	60.2329
34.5	14.625	23.2241	32.8062	41.9478	49.4014	55.3345	60.2295
34.6	14.6318	23.2241	32.7969	41.9404	49.3921	55.3452	60.2334
34.7	14.6392	23.2295	32.8022	41.9429	49.4038	55.3291	60.2383
34.8	14.6382	23.2295	32.8032	41.9438	49.4092	55.3345	60.2437
34.9	14.6299	23.2212	32.7993	41.9517	49.4126	55.3423	60.2515
35	14.624	23.2256	32.8076	41.96	49.4092	55.3345	60.2451
35.1	14.6353	23.2319	32.8057	41.9697	49.4272	55.3486	60.2524
35.2	14.6455	23.2329	32.8228	41.9805	49.436	55.3657	60.2578
35.3	14.6553	23.2349	32.8271	41.9688	49.438	55.3647	60.2661
35.4	14.6548	23.2344	32.8345	41.9805	49.4429	55.3745	60.2734
35.5	14.6631	23.2568	32.8374	41.9883	49.4546	55.3789	60.2827
35.6	14.6611	23.2642	32.8359	41.9922	49.4546	55.3838	60.2891
35.7	14.6748	23.2661	32.8491	41.9912	49.4546	55.3906	60.2974
35.8	14.6704	23.2632	32.854	41.9868	49.4521	55.3853	60.2905
35.9	14.6719	23.2632	32.8477	41.9883	49.4531	55.3931	60.3022
36	14.6836	23.2725	32.8555	42	49.4741	55.4063	60.3101
36.1	14.6797	23.2681	32.8579	41.9961	49.4741	55.3994	60.3101
36.2	14.686	23.2773	32.8672	42.001	49.4751	55.3955	60.3047
36.3	14.6938	23.2866	32.8672	42.0093	49.4756	55.4141	60.3242
36.4	14.7061	23.2935	32.8789	42.0132	49.4771	55.4165	60.3169
36.5	14.6938	23.2915	32.875	42.0166	49.4712	55.4072	60.311
36.6	14.7139	23.2881	32.8672	42.0225	49.4795	55.4141	60.3169
36.7	14.7095	23.2998	32.8765	42.0288	49.4912	55.4243	60.314
36.8	14.6914	23.293	32.854	42.0166	49.4829	55.4243	60.3101
36.9	14.7109	23.3125	32.8672	42.0288	49.5054	55.4229	60.3203
37	14.7031	23.3076	32.8726	42.0195	49.499	55.4155	60.313
37.1	14.7031	23.3022	32.8735	42.0078	49.5132	55.4136	60.311
37.2	14.7109	23.3125	32.8789	42.0181	49.5234	55.4336	60.3232
37.3	14.7031	23.3076	32.8779	42.0107	49.5068	55.4155	60.314
37.4	14.7148	23.3257	32.8892	42.0078	49.5054	55.4331	60.3257
37.5	14.7109	23.3193	32.8931	42.0078	49.5054	55.4336	60.3218
37.6	14.7134	23.3242	32.9023	42.0103	49.5054	55.4346	60.3359
37.7	14.7202	23.3218	32.9155	42.0132	49.5015	55.4438	60.3389
37.8	14.7329	23.3335	32.9141	42.0166	49.5132	55.4517	60.3413
37.9	14.7319	23.332	32.918	42.0288	49.5039	55.4556	60.3398
38	14.7227	23.3271	32.9141	42.0171	49.499	55.4634	60.335
38.1	14.7329	23.3438	32.9282	42.0181	49.5132	55.4634	60.353
38.2	14.7305	23.3428	32.9351	42.0298	49.5156	55.4658	60.353
38.3	14.728	23.3452	32.9375	42.0225	49.5161	55.4688	60.353
38.4	14.7305	23.3506	32.9258	42.0273	49.5015	55.4805	60.3608
38.5	14.7422	23.3423	32.9453	42.0391	49.5132	55.4829	60.3608
38.6	14.7422	23.3545	32.9375	42.0376	49.5132	55.4814	60.3633
38.7	14.7549	23.3477	32.9502	42.043	49.5259	55.4868	60.3672
38.8	14.7568	23.356	32.9404	42.0391	49.5264	55.4868	60.3833
38.9	14.7563	23.354	32.9385	42.043	49.5366	55.4868	60.3853
39	14.7646	23.356	32.9429	42.0405	49.5366	55.4961	60.3872
39.1	14.7603	23.3594	32.9546	42.0571	49.542	55.5127	60.3921
39.2	14.7446	23.3477	32.9375	42.0391	49.5259	55.5063	60.3921
39.3	14.7515	23.3623	32.936	42.0508	49.5366	55.5117	60.4023
39.4	14.7437	23.353	32.939	42.0483	49.5356	55.5039	60.3911
39.5	14.7485	23.3506	32.9453	42.0391	49.5327	55.5127	60.3906
39.6	14.7329	23.3438	32.9453	42.0469	49.5337	55.5024	60.3921
39.7	14.7515	23.3647	32.9556	42.0571	49.542	55.5127	60.4038
39.8	14.7422	23.374	32.9507	42.0498	49.5356	55.5078	60.4038
39.9	14.7397	23.3608	32.9546	42.0454	49.5313	55.5117	60.4014
40	14.7446	23.3726	32.9541	42.0493	49.5352	55.5112	60.4023
40.1	14.751	23.3813	32.957	42.0586	49.5444	55.5142	60.4102
40.2	14.7437	23.3857	32.9492	42.061	49.543	55.5142	60.4155
40.3	14.7437	23.3726	32.9453	42.0498	49.5356	55.5234	60.4224
40.4	14.7397	23.3818	32.9468	42.0562	49.5313	55.5142	60.4219
40.5	14.7314	23.3735	32.9399	42.0361	49.5273	55.5127	60.4116
40.6	14.7412	23.3833	32.9561	42.0522	49.5552	55.5156	60.4233
40.7	14.7432	23.3843	32.9658	42.0688	49.5469	55.5259	60.4233
40.8	14.7461	23.3711	32.9663	42.0625	49.5522	55.5205	60.4233
40.9	14.7515	23.3818	32.9634	42.0679	49.542	55.5376	60.4297
41	14.7344	23.3765	32.9624	42.0625	49.5366	55.5391	60.4263
41.1	14.7344	23.375	32.9556	42.0703	49.5249	55.5454	60.4258
41.2	14.7422	23.3936	32.9688	42.0703	49.5327	55.5518	60.4404
41.3	14.7422	23.3804	32.9653	42.0781	49.5327	55.5469	60.4312
41.4	14.7539	23.3843	32.9541	42.0703	49.5444	55.5532	60.4453
41.5	14.7422	23.3789	32.9648	42.0757	49.5405	55.5596	60.4404
41.6	14.7422	23.3765	32.9688	42.0728	49.5273	55.5571	60.4438
41.7	14.7524	23.3818	32.9766	42.0884	49.5522	55.5767	60.4585
41.8	14.7529	23.3726	32.9766	42.0889	49.5356	55.564	60.4536
41.9	14.7549	23.3765	32.9766	42.0908	49.5337	55.5659	60.4634
42	14.7554	23.3726	32.978	42.0913	49.5435	55.5664	60.4653
42.1	14.7632	23.3843	32.9868	42.1069	49.5562	55.5806	60.4546
42.2	14.7524	23.3843	32.9766	42.0986	49.5649	55.5674	60.4609
42.3	14.7695	23.3921	32.9741	42.1084	49.563	55.5718	60.4521
42.4	14.771	23.3818	32.9648	42.1079	49.5625	55.5728	60.46
42.5	14.7563	23.3726	32.9556	42.0898	49.5562	55.5713	60.4438
42.6	14.772	23.3735	32.9453	42.0898	49.564	55.5728	60.4453
42.7	14.7671	23.3779	32.9492	42.1016	49.5679	55.5767	60.4653
42.8	14.771	23.3804	32.9468	42.1069	49.5615	55.5845	60.4624
42.9	14.7822	23.3843	32.958	42.1104	49.5649	55.5962	60.4712
43	14.7764	23.3726	32.9482	42.1006	49.5669	55.5845	60.4653
43.1	14.7798	23.3843	32.9556	42.1157	49.5703	55.6016	60.4805
43.2	14.7656	23.3765	32.9375	42.1016	49.5562	55.5854	60.4663
43.3	14.7632	23.3726	32.9365	42.1084	49.564	55.5835	60.4614
43.4	14.7744	23.3765	32.9463	42.1118	49.5679	55.5854	60.4634
43.5	14.7944	23.3804	32.9585	42.1392	49.5718	55.5938	60.4702
43.6	14.7725	23.3584	32.9375	42.1187	49.5576	55.5757	60.4482
43.7	14.7939	23.3711	32.9492	42.1211	49.5742	55.5933	60.4624
43.8	14.7905	23.3647	32.9438	42.1079	49.564	55.5938	60.4609
43.9	14.7822	23.3726	32.9375	42.0977	49.5742	55.5815	60.4624
44	14.7842	23.3647	32.9272	42.1016	49.5669	55.5874	60.4546
44.1	14.7939	23.3765	32.9282	42.1094	49.582	55.6064	60.4663
44.2	14.792	23.3726	32.9351	42.1069	49.5747	55.6016	60.4639
44.3	14.7822	23.3647	32.9165	42.0977	49.561	55.5933	60.4624
44.4	14.7959	23.3638	32.9287	42.1016	49.5786	55.5991	60.4624
44.5	14.7837	23.3501	32.9165	42.0977	49.5728	55.5923	60.4648
44.6	14.8037	23.3584	32.9351	42.1016	49.5864	55.5845	60.4639
44.7	14.8018	23.3608	32.9282	42.0962	49.5845	55.5845	60.4531
44.8	14.8047	23.3633	32.9258	42.0913	49.585	55.583	60.4663
44.9	14.8179	23.3701	32.9336	42.1069	49.6006	55.6094	60.4795
45	14.8149	23.3672	32.9258	42.0986	49.5923	55.605	60.4766
45.1	14.8125	23.3701	32.9258	42.0889	49.5942	55.6069	60.4819
45.2	14.8125	23.3672	32.918	42.0986	49.604	55.604	60.4741
45.3	14.8125	23.3701	32.9126	42.0898	49.6045	55.604	60.4805
45.4	14.8149	23.375	32.9194	42.103	49.6055	55.6143	60.4756
45.5	14.8257	23.3818	32.9165	42.0977	49.6162	55.625	60.4858
45.6	14.8267	23.3853	32.9102	42.104	49.6157	55.6167	60.4937
45.7	14.835	23.3872	32.9194	42.1123	49.6294	55.6265	60.5054
45.8	14.8213	23.3711	32.9087	42.1182	49.6147	55.626	60.5015
45.9	14.835	23.3726	32.9155	42.1226	49.6226	55.6328	60.5015
46	14.8188	23.3701	32.9038	42.1265	49.6187	55.6104	60.499
46.1	14.8203	23.3608	32.8955	42.126	49.603	55.6143	60.4907
46.2	14.8188	23.3594	32.9038	42.1265	49.6211	55.6328	60.5029
46.3	14.8232	23.3638	32.8945	42.1289	49.6138	55.6211	60.5005
46.4	14.8228	23.3618	32.8984	42.1211	49.6147	55.6064	60.5024
46.5	14.8345	23.3687	32.9077	42.1328	49.625	55.6289	60.5146
46.6	14.8555	23.396	32.9268	42.1494	49.6328	55.644	60.522
46.7	14.8545	23.4038	32.9287	42.1514	49.6372	55.6577	60.5356
46.8	14.8579	23.4131	32.9243	42.1602	49.6343	55.6548	60.5405
46.9	14.8516	23.4048	32.9258	42.1587	49.6431	55.6636	60.5508
47	14.854	23.4053	32.9282	42.1523	49.6475	55.668	60.5483
47.1	14.8647	23.4131	32.9272	42.1719	49.6538	55.6665	60.564
47.2	14.8555	23.4038	32.9155	42.1709	49.6396	55.6743	60.5732
47.3	14.8633	23.4116	32.918	42.1768	49.6538	55.686	60.5742
47.4	14.8647	23.4116	32.9258	42.1929	49.6655	55.6851	60.5811
47.5	14.8604	23.4116	32.9126	42.1992	49.6641	55.6792	60.5718
47.6	14.8726	23.4116	32.918	42.1992	49.6709	55.6821	60.5703
47.7	14.8633	23.4126	32.9165	42.2056	49.6743	55.6938	60.5835
47.8	14.8711	23.4146	32.917	42.2007	49.6841	55.6938	60.5928
47.9	14.8828	23.4258	32.9126	42.2197	49.6938	55.6938	60.6094
48	14.875	23.4326	32.9116	42.2139	49.6958	55.6978	60.5967
48.1	14.8828	23.4258	32.9258	42.2188	49.6938	55.7056	60.6157
48.2	14.8828	23.4341	32.9258	42.207	49.6958	55.707	60.6138
48.3	14.8828	23.4399	32.9282	42.2212	49.7046	55.7212	60.625
48.4	14.8804	23.4404	32.9546	42.228	49.7109	55.7197	60.6382
48.5	14.8721	23.4375	32.936	42.2197	49.7085	55.7173	60.6172
48.6	14.874	23.4468	32.9414	42.2358	49.7085	55.7251	60.6372
48.7	14.8721	23.4429	32.9375	42.2305	49.7046	55.7275	60.6313
48.8	14.8765	23.4546	32.9351	42.2437	49.7061	55.7358	60.645
48.9	14.9023	23.4546	32.9375	42.251	49.7227	55.7456	60.6509
49	14.8906	23.4536	32.9258	42.2515	49.7036	55.7437	60.6528
49.1	14.8999	23.457	32.9233	42.2554	49.707	55.7407	60.6592
49.2	14.8931	23.4429	32.9126	42.2524	49.7046	55.7456	60.6509
49.3	14.9023	23.4546	32.9063	42.2607	49.7124	55.7476	60.6646
49.4	14.9116	23.4624	32.9155	42.2563	49.7241	55.75	60.6655
49.5	14.8906	23.4507	32.8931	42.2485	49.7124	55.7417	60.6509
49.6	14.897	23.4609	32.9063	42.2554	49.7227	55.7446	60.6616
49.7	14.8945	23.4492	32.9087	42.251	49.7163	55.7446	60.6655
49.8	14.8945	23.4536	32.8999	42.2437	49.7163	55.7446	60.6538
49.9	14.8945	23.4634	32.9063	42.2578	49.7241	55.7471	60.6655
50	14.8945	23.4575	32.9077	42.2632	49.7153	55.7554	60.6631
50.1	14.8828	23.4507	32.897	42.2666	49.7134	55.7534	60.6421
50.2	14.8867	23.4546	32.9102	42.2607	49.7153	55.7476	60.6538
50.3	14.8896	23.4521	32.918	42.2681	49.7227	55.7549	60.6631
50.4	14.8604	23.4438	32.918	42.25	49.707	55.7446	60.6406
50.5	14.8608	23.4429	32.9141	42.2476	49.7217	55.7422	60.6421
50.6	14.854	23.4507	32.9219	42.2407	49.7202	55.7354	60.6367
50.7	14.8608	23.46	32.9233	42.25	49.7305	55.7422	60.6514
50.8	14.8525	23.457	32.9189	42.2422	49.7305	55.7339	60.6343
50.9	14.8569	23.4741	32.9312	42.25	49.7388	55.7476	60.6538
51	14.8608	23.4717	32.9351	42.2476	49.7305	55.7393	60.6538
51.1	14.8569	23.4561	32.9282	42.2422	49.7295	55.7383	60.6553
51.2	14.8501	23.4688	32.9375	42.2563	49.7295	55.7446	60.6602
51.3	14.8398	23.4648	32.9336	42.2461	49.7212	55.7407	60.6523
51.4	14.8423	23.4717	32.9375	42.2485	49.7256	55.7432	60.6514
51.5	14.835	23.4624	32.9453	42.2529	49.7241	55.7422	60.6553
51.6	14.8423	23.4766	32.9453	42.2578	49.7358	55.7471	60.6626
51.7	14.8408	23.4819	32.9478	42.2471	49.7344	55.7642	60.6616
51.8	14.8467	23.4858	32.9702	42.2593	49.7476	55.7681	60.6646
51.9	14.8306	23.4717	32.9648	42.2358	49.7334	55.7617	60.6616
52	14.832	23.4727	32.9766	42.2393	49.7319	55.7651	60.6704
52.1	14.8374	23.4858	32.978	42.2334	49.7358	55.7671	60.6646
52.2	14.8374	23.4834	32.9829	42.2241	49.7412	55.7617	60.6602
52.3	14.8213	23.4688	32.9766	42.2197	49.7368	55.7534	60.6563
52.4	14.832	23.4834	32.9868	42.2319	49.7451	55.7656	60.6748
52.5	14.8086	23.4766	32.9819	42.2134	49.728	55.7563	60.6563
52.6	14.832	23.4819	32.9829	42.2163	49.7422	55.7705	60.6616
52.7	14.8311	23.481	32.9756	42.2085	49.7427	55.7749	60.6724
52.8	14.8345	23.4829	32.9775	42.2275	49.7344	55.7744	60.6626
52.9	14.8501	23.5029	32.9858	42.228	49.7539	55.8018	60.6772
53	14.8438	23.4946	32.979	42.2314	49.7554	55.8071	60.6851
53.1	14.8438	23.4927	32.9873	42.2295	49.7568	55.8032	60.6724
53.2	14.8438	23.5015	32.9829	42.2358	49.7725	55.8125	60.6797
53.3	14.8413	23.5117	32.9844	42.2329	49.7695	55.8086	60.6787
53.4	14.8438	23.5146	33	42.2397	49.7764	55.8135	60.6719
53.5	14.8608	23.5249	33.0132	42.2485	49.7813	55.8267	60.6851
53.6	14.8408	23.5132	33.0049	42.2407	49.7773	55.8213	60.6812
53.7	14.853	23.5195	33.0195	42.2593	49.792	55.8267	60.6929
53.8	14.8423	23.5225	33.0249	42.2563	49.7944	55.8438	60.6992
53.9	14.835	23.5068	33.021	42.2529	49.7944	55.8359	60.6958
54	14.8345	23.5142	33.0361	42.2705	49.8203	55.8525	60.6938
54.1	14.8555	23.5249	33.0508	42.2788	49.835	55.8462	60.7085
54.2	14.8491	23.5239	33.0459	42.271	49.8257	55.853	60.6958
54.3	14.8423	23.522	33.0571	42.2891	49.8359	55.8628	60.7031
54.4	14.8608	23.5303	33.0742	42.3071	49.8545	55.8735	60.7202
54.5	14.8447	23.5273	33.0674	42.3008	49.8452	55.8774	60.6992
54.6	14.8452	23.5239	33.0693	42.3008	49.8335	55.875	60.7036
54.7	14.8633	23.5337	33.0806	42.311	49.8477	55.894	60.7134
54.8	14.8516	23.5303	33.0835	42.3179	49.8623	55.8906	60.7124
54.9	14.8516	23.5249	33.0679	42.3125	49.8452	55.8853	60.7178
55	14.8516	23.5352	33.0869	42.3203	49.8647	55.897	60.7319
55.1	14.8501	23.5303	33.0835	42.3179	49.8633	55.8916	60.7202
55.2	14.8452	23.5342	33.0859	42.3281	49.8638	55.896	60.7334
55.3	14.8657	23.5493	33.0884	42.3281	49.875	55.9033	60.7407
55.4	14.8828	23.564	33.104	42.3369	49.8843	55.9243	60.7578
55.5	14.8867	23.5576	33.1006	42.3428	49.8843	55.9165	60.7661
55.6	14.8867	23.5742	33.1069	42.3477	49.896	55.9243	60.7749
55.7	14.8945	23.5757	33.1064	42.3604	49.9063	55.936	60.7813
55.8	14.8843	23.5654	33.1084	42.3506	49.8975	55.9243	60.7646
55.9	14.9009	23.5835	33.1143	42.3618	49.9038	55.9463	60.771
56	14.8945	23.5898	33.1265	42.3774	49.9155	55.9531	60.7813
56.1	14.9014	23.5825	33.1187	42.3818	49.9233	55.9634	60.7764
56.2	14.9111	23.5923	33.1338	42.3892	49.9351	55.9751	60.7905
56.3	14.9116	23.5952	33.1382	42.3999	49.9272	55.9751	60.793
56.4	14.9038	23.5942	33.1367	42.3984	49.9326	55.9751	60.7998
56.5	14.9111	23.5923	33.1392	42.3984	49.9258	55.9751	60.8022
56.6	14.9141	23.5952	33.1577	42.4204	49.9429	55.9854	60.8032
56.7	14.9155	23.5928	33.1445	42.4297	49.9429	55.9819	60.813
56.8	14.9204	23.6016	33.1343	42.4297	49.9521	55.9814	60.8022
56.9	14.9258	23.6069	33.1377	42.4297	49.9556	55.9868	60.814
57	14.9209	23.5942	33.1382	42.4312	49.9561	55.9829	60.8022
57.1	14.918	23.5977	33.1421	42.4438	49.9717	55.9946	60.8076
57.2	14.9204	23.5952	33.1367	42.4414	49.9609	55.9922	60.8008
57.3	14.9243	23.5952	33.1431	42.4492	49.9663	55.9971	60.8047
57.4	14.9404	23.6108	33.1577	42.4702	49.9741	56.0117	60.8325
57.5	14.9282	23.6006	33.1602	42.4673	49.9717	55.9907	60.8335
57.6	14.9336	23.6055	33.147	42.4751	49.9727	55.9854	60.8423
57.7	14.9351	23.6226	33.1655	42.4912	49.9795	55.9937	60.856
57.8	14.9424	23.6108	33.1445	42.479	49.9819	55.9917	60.8438
57.9	14.9507	23.6201	33.1431	42.4858	49.9922	56.0024	60.8569
58	14.936	23.6133	33.1431	42.4712	49.9858	56.0063	60.8477
58.1	14.9414	23.6094	33.146	42.4868	49.9727	55.9932	60.8428
58.2	14.9351	23.6162	33.1484	42.4795	49.9873	56	60.8428
58.3	14.9312	23.624	33.146	42.479	49.9951	56.0039	60.8516
58.4	14.9243	23.6133	33.1265	42.4727	49.9873	55.9971	60.8374
58.5	14.9438	23.625	33.1338	42.4883	49.9907	55.9946	60.8491
58.6	14.9507	23.6396	33.1406	42.4883	49.9912	56.0024	60.8608
58.7	14.9556	23.625	33.1304	42.4907	49.9883	56.0078	60.8672
58.8	14.9741	23.646	33.1484	42.5093	50.0029	56.0205	60.896
58.9	14.9517	23.6538	33.1416	42.4907	49.9946	56.0142	60.8843
59	14.9468	23.646	33.1201	42.5029	49.9888	56.0039	60.8843
59.1	14.9492	23.6577	33.1343	42.5078	49.9937	56.0142	60.896
59.2	14.9478	23.6655	33.1274	42.5088	50.0015	56.0166	60.9038
59.3	14.9492	23.6631	33.1353	42.5	49.9702	56.0127	60.9014
59.4	14.9468	23.6538	33.1343	42.499	49.9756	56.0249	60.9092
59.5	14.9556	23.6733	33.1367	42.5103	49.9922	56.0205	60.9023
59.6	14.9648	23.6719	33.1431	42.5259	50.0039	56.0259	60.9219
59.7	14.9844	23.6733	33.1304	42.5313	50.0015	56.0313	60.9131
59.8	14.9648	23.6631	33.0835	42.5171	49.9756	56.0024	60.8843
59.9	14.9624	23.6538	33.0664	42.5078	49.9702	55.9985	60.8687
60	14.9648	23.6553	33.0625	42.4922	49.9458	55.9868	60.8662
60.1	14.978	23.6758	33.082	42.5132	49.9468	55.9907	60.8765
60.2	14.9883	23.6875	33.104	42.5205	49.9766	56.0259	60.8906
60.3	14.9805	23.7192	33.1343	42.5459	49.999	56.0156	60.8857
60.4	14.979	23.6978	33.0923	42.5024	50.0195	55.9722	60.8789
60.5	14.9624	23.667	33.103	42.4468	49.9795	55.9883	60.835
60.6	14.9751	23.6929	33.1274	42.5049	49.9673	56.0229	60.8501
60.7	14.9634	23.6499	33.1353	42.5117	49.9688	56.0063	60.8633
60.8	14.9585	23.5913	33.1147	42.4951	50.0156	55.9868	60.9277
60.9	14.9727	23.5474	33.0938	42.46	50.0728	56.0103	60.9209
61	14.9609	23.4243	33.2031	42.6045	49.8828	56.1206	60.6328
61.1*	14.9507*	23.4888*	33.3975*	42.7607*	49.7139*	56.1016*	60.5566*
61.2*	14.875*	23.5825*	33.4619*	42.79*	49.7583*	56.0986*	60.9087*
61.3*	14.9478*	23.7813*	33.4492*	42.7437*	50.8223*	56.2217*	66.4067*
61.4*	14.8022*	24.0923*	31.9102*	40.8218*	54.9688*	57.5024*	91.2842*
61.5*	15.0112*	24.4385*	31.2437*	39.3135*	62.9307*	68.9111*	119.212*
61.6*	14.7656*	24.5684*	34.5264*	44.1436*	65.6528*	83.5728*	126.916*
61.7*	14.5063*	24.5493*	37.0737*	48.7422*	65.3037*	88.0664*	123.433*
61.8*	14.8262*	25.2969*	38.2378*	50.8345*	64.4102*	86.9473*	117.226*
61.9*	15.0562*	25.5381*	38.8945*	51.7314*	62.9258*	84.522*	110.397*
62*	16.1221*	26.0366*	39.6001*	52.521*	62.3062*	82.605*	104.885*
62.1*	15.6431*	25.6406*	39.0938*	52.167*	60.7207*	79.4272*	99.6162*
62.2*	16.0283*	25.7837*	39.0679*	51.7612*	59.6055*	76.8501*	95.1108*
62.3*	16.0078*	25.9858*	39.0293*	51.1187*	58.9458*	74.4497*	90.9199*
62.4*	16.2002*	25.9414*	38.5088*	50.2236*	57.6079*	72.3633*	86.8584*
62.5*	16.3916*	25.8594*	38.1299*	49.5938*	56.7959*	70.3101*	83.6787*
62.6*	16.4819*	25.7178*	37.9194*	48.8267*	55.9443*	68.25*	80.686*
62.7*	16.0527*	25.6948*	37.0898*	47.709*	54.5918*	66.313*	77.7114*
62.8*	16.1836*	25.7007*	36.7246*	47.0059*	53.6084*	64.6187*	75.0488*
62.9*	16.1016*	25.3291*	36.2031*	46.019*	52.5547*	62.7173*	72.4507*
63*	16.2891*	25.373*	35.7935*	45.4834*	51.8203*	61.3232*	70.4419*
63.1*	16.1914*	25.2358*	35.3027*	44.855*	50.7319*	59.9087*	68.146*
63.2*	15.9707*	24.9351*	34.8457*	44.0508*	49.7163*	58.4028*	65.998*
63.3	15.8491*	24.7139*	34.4546*	43.3418*	48.9897	57.2603*	64.394*
63.4	15.8511*	24.5581*	34.1699*	42.6816*	48.2886	56.0571	62.9175*
63.5	15.6592*	24.3086*	33.6104*	42.0127*	47.3013	54.644	61.3618*
63.6	15.3945*	24.0601*	33.0449*	41.4453	46.6943	53.8071	59.9077
63.7	15.2788*	23.8804*	32.7944	40.9976	46.1006	52.8672	58.7476
63.8	15.2344	23.6147	32.6094	40.5332	45.4937	51.9829	57.6631
63.9	15.2251	23.375	32.3813	40.0649	44.9673	51.1597	56.5591
64	15.3076	23.5342	32.2305	39.6616	44.5107	50.5415	55.6421
64.1	15.2915	23.3491	31.9844	39.2114	43.9922	49.8438	54.5977
64.2	15.1338	23.0859	31.5532	38.7134	43.2944	48.978	53.7695
64.3	14.9912	22.8271	31.168	38.2319	42.7593	48.1421	52.9312
64.4	14.8477	22.5732	30.8115	37.7554	42.1841	47.2388	52.0825
64.5	14.7773	22.4321	30.54	37.3096	41.6626	46.7666	51.2837
64.6	14.6289	22.2554	30.1953	36.8921	41.103	46.1953	50.5796
64.7	14.5649	22.1304	29.8867	36.4648	40.5952	45.6807	49.9819
64.8	14.4858	21.9805	29.5483	36.0806	40.228	45.147	49.3374
64.9	14.4048	21.8623	29.3032	35.7109	39.8101	44.6533	48.7598
65	14.3188	21.707	28.9844	35.4243	39.436	44.1313	48.1992
65.1	14.2632	21.5444	28.6704	35.0952	39.0513	43.6064	47.542
65.2	14.125	21.3491	28.3623	34.7319	38.5991	43.0718	46.9624
65.3	14	21.1616	28.1055	34.3516	38.2109	42.5361	46.4063
65.4	13.9165	21.0352	27.8877	34.0103	37.8257	42.1064	45.9438
65.5	13.8335	20.8779	27.6641	33.6953	37.4102	41.6836	45.4287
65.6	13.7344	20.728	27.4727	33.3711	37.0444	41.2432	44.9663
65.7	13.646	20.5469	27.2632	33.0132	36.6411	40.811	44.4507
65.8	13.5415	20.3911	27.0273	32.6563	36.2397	40.396	43.9546
65.9	13.4194	20.1968	26.7788	32.3125	35.8179	39.9634	43.4624
66	13.2993	20.0078	26.5376	31.9883	35.4141	39.5034	43.0273
66.1	13.2227	19.8804	26.3203	31.707	35.0874	39.0977	42.5811
66.2	13.146	19.7437	26.1343	31.4219	34.8076	38.7446	42.2124
66.3	13.0806	19.603	25.9126	31.1289	34.478	38.3228	41.8022
66.4	12.9648	19.4429	25.6768	30.8213	34.1548	37.9072	41.3633
66.5	12.8828	19.2983	25.4678	30.5498	33.8716	37.5547	40.9224
66.6	12.8164	19.1538	25.2642	30.2759	33.5664	37.1963	40.5234
66.7	12.75	19.0093	25.0366	30.0171	33.2373	36.8164	40.1421
66.8	12.6274	18.8555	24.7852	29.7314	32.9336	36.4487	39.7422
66.9	12.4951	18.6997	24.5039	29.417	32.5679	36.1094	39.3467
67	12.4063	18.561	24.2671	29.1367	32.2539	35.772	38.9688
67.1	12.2813	18.3926	24.0313	28.8477	31.9419	35.4023	38.5654
67.2	12.1875	18.2407	23.854	28.5767	31.6587	35.0464	38.1968
67.3	12.0923	18.0967	23.6211	28.3413	31.3677	34.7188	37.8242
67.4	12.0234	17.9688	23.4258	28.1196	31.1055	34.4009	37.4951
67.5	11.9546	17.7842	23.2163	27.8984	30.8218	34.0742	37.1641
67.6	11.8931	17.6577	23.0078	27.6523	30.5352	33.7744	36.8154
67.7	11.8022	17.5186	22.8164	27.4155	30.2388	33.4517	36.4365
67.8	11.6938	17.3735	22.6455	27.1689	29.9438	33.1157	36.0752
67.9	11.6406	17.2046	22.4883	26.9233	29.689	32.8345	35.7256
68	11.6133	17.0732	22.3271	26.7046	29.4731	32.5547	35.4248
68.1	11.5288	16.96	22.1431	26.458	29.1953	32.251	35.1328
68.2	11.4243	16.8203	21.939	26.2217	28.9155	31.957	34.7998
68.3	11.375	16.6865	21.7681	26.0103	28.689	31.6768	34.4883
68.4	11.2798	16.5532	21.5962	25.7783	28.4648	31.376	34.2148
68.5	11.1953	16.4155	21.4375	25.542	28.2163	31.1055	33.8857
68.6	11.1045	16.2739	21.2578	25.2891	27.9731	30.7954	33.5835
68.7	11.0195	16.1475	21.085	25.0796	27.7295	30.4805	33.2827
68.8	10.9414	16.0313	20.9009	24.8774	27.5039	30.1978	33.0171
68.9	10.8516	15.9219	20.7163	24.6733	27.2905	29.9932	32.7539
69	10.793	15.8154	20.5571	24.479	27.0522	29.7603	32.4873
69.1	10.6899	15.6821	20.397	24.2773	26.793	29.5244	32.2031
69.2	10.5938	15.5444	20.2188	24.0586	26.5444	29.2642	31.9351
69.3	10.5313	15.4351	20.0703	23.8765	26.3232	29.0273	31.6538
69.4	10.4155	15.3062	19.8999	23.6626	26.0781	28.7783	31.3867
69.5	10.3657	15.2007	19.7681	23.5	25.8765	28.5781	31.1499
69.6	10.2813	15.1172	19.6055	23.3188	25.625	28.333	30.9116
69.7	10.2124	15.0342	19.4468	23.1523	25.3936	28.1016	30.6631
69.8	10.0767	14.8804	19.2617	22.9585	25.1836	27.8306	30.3687
69.9	10.0063	14.7373	19.0962	22.7578	24.9678	27.5752	30.1147
70	9.94043	14.6211	18.918	22.5586	24.7529	27.354	29.8311
70.1	9.83984	14.4741	18.7461	22.3594	24.5352	27.104	29.5522
70.2	9.78125	14.3779	18.5977	22.168	24.353	26.876	29.2915
70.3	9.75244	14.2905	18.478	21.9922	24.1865	26.6655	29.0459
70.4	9.70313	14.1953	18.3242	21.8164	24.0015	26.4517	28.8389
70.5	9.64453	14.103	18.168	21.6367	23.8242	26.2549	28.6055
70.6	9.57178	14.0107	18.0327	21.4741	23.6396	26.0508	28.3584
70.7	9.48975	13.8828	17.8945	21.2783	23.4531	25.8228	28.1304
70.8	9.40869	13.7632	17.7549	21.0796	23.2515	25.6118	27.918
70.9	9.36328	13.6826	17.6211	20.8789	23.0874	25.4048	27.6851
71	9.29297	13.5703	17.4688	20.707	22.8828	25.1963	27.4351
71.1	9.22412	13.4482	17.3389	20.522	22.6802	24.9883	27.2163
71.2	9.17041	13.3701	17.2134	20.3516	22.4961	24.8032	27.0054
71.3	9.104	13.2524	17.0713	20.1938	22.3164	24.605	26.7969
71.4	9.02246	13.145	16.9185	20.042	22.1436	24.3984	26.5942
71.5	8.96191	13.0532	16.8018	19.8813	21.9663	24.2056	26.3726
71.6	8.90234	12.9429	16.6758	19.7305	21.7617	23.9829	26.1602
71.7	8.86719	12.8569	16.5679	19.5688	21.5874	23.7939	25.9351
71.8	8.80469	12.7749	16.4063	19.3936	21.3857	23.5796	25.7124
71.9	8.73682	12.6992	16.2798	19.2612	21.207	23.3823	25.5444
72	8.67627	12.5957	16.1592	19.1436	21.0264	23.1968	25.3623
72.1	8.59229	12.4844	16.0361	18.9688	20.8672	22.9932	25.1548
72.2	8.52344	12.4116	15.8999	18.8413	20.7153	22.8047	24.9849
72.3	8.42188	12.2827	15.7656	18.6938	20.5391	22.6128	24.7905
72.4	8.34619	12.186	15.6377	18.5532	20.3867	22.4307	24.6172
72.5	8.29199	12.106	15.5303	18.4092	20.2334	22.2554	24.4419
72.6	8.23926	12.021	15.4087	18.2783	20.0718	22.0923	24.2603
72.7	8.18262	11.9443	15.3076	18.1538	19.9351	21.9141	24.0771
72.8	8.12891	11.8789	15.1729	18.0234	19.7827	21.7588	23.9116
72.9	8.07275	11.7671	15.0483	17.875	19.6475	21.6001	23.6953
73	8.01172	11.6875	14.9321	17.7437	19.4883	21.4321	23.5093
73.1	7.96729	11.5991	14.8101	17.6221	19.3491	21.2783	23.3374
73.2	7.9126	11.521	14.6963	17.5078	19.1938	21.1143	23.1938
73.3	7.87646	11.4351	14.603	17.3906	19.0396	20.9609	23.0161
73.4	7.8125	11.3428	14.5068	17.2397	18.8726	20.7915	22.8232
73.5	7.76416	11.2642	14.3955	17.1172	18.7266	20.6431	22.6719
73.6	7.70605	11.1763	14.2891	17	18.5874	20.5063	22.5249
73.7	7.64307	11.082	14.1978	16.8813	18.4233	20.354	22.3438
73.8	7.58203	11.0132	14.0967	16.7695	18.2671	20.2134	22.1865
73.9	7.54541	10.9312	14.0049	16.6484	18.1226	20.0728	22.0298
74	7.50391	10.8647	13.8999	16.5117	17.9741	19.9126	21.8975
74.1	7.45068	10.7632	13.7969	16.3789	17.8257	19.7642	21.7217
74.2	7.38428	10.7217	13.7148	16.249	17.6841	19.6211	21.5625
74.3	7.35254	10.6445	13.625	16.1182	17.561	19.4854	21.4038
74.4	7.32324	10.5913	13.5352	16.0093	17.4663	19.3735	21.2646
74.5	7.2915	10.5459	13.418	15.9009	17.3271	19.2266	21.0938
74.6	7.24463	10.4907	13.3164	15.7813	17.1743	19.1011	20.9233
74.7	7.22412	10.4341	13.2188	15.6602	17.0356	18.9531	20.7764
74.8	7.18213	10.3501	13.1055	15.5273	16.9009	18.8057	20.6392
74.9	7.14453	10.2935	13.0156	15.4102	16.7661	18.6743	20.4937
75	7.09277	10.2241	12.9272	15.2881	16.6226	18.5249	20.3247
75.1	7.02051	10.1313	12.8447	15.1963	16.4648	18.3745	20.1719
75.2	6.97559	10.0669	12.7593	15.0913	16.3452	18.2358	20.0522
75.3	6.94238	9.99463	12.668	15.001	16.2241	18.105	19.9141
75.4	6.875	9.92627	12.5469	14.8896	16.0771	17.9663	19.7568
75.5	6.84375	9.86182	12.457	14.7861	15.9438	17.8315	19.6313
75.6	6.78516	9.76465	12.3594	14.6826	15.8169	17.6875	19.4771
75.7	6.73047	9.68359	12.2642	14.5557	15.6938	17.5542	19.3438
75.8	6.69287	9.60693	12.1787	14.4414	15.5796	17.4414	19.2046
75.9	6.61328	9.53027	12.0938	14.3389	15.4536	17.3257	19.0708
76	6.55078	9.45068	12.0166	14.208	15.3281	17.1909	18.9282
76.1	6.50391	9.39209	11.9287	14.1123	15.2256	17.0625	18.8335
76.2	6.44141	9.3125	11.8423	13.9697	15.1289	16.9321	18.6836
76.3	6.41406	9.26611	11.7578	13.8726	15.0249	16.8149	18.5356
76.4	6.36426	9.19385	11.6563	13.7891	14.9038	16.7065	18.3945
76.5	6.34668	9.12549	11.5781	13.6797	14.7983	16.5874	18.2842
76.6	6.31494	9.0625	11.5117	13.582	14.6968	16.4658	18.1641
76.7	6.27344	8.98584	11.4385	13.4868	14.5845	16.3657	18.0132
76.8	6.22021	8.92334	11.3569	13.4038	14.4771	16.2383	17.8843
76.9	6.18604	8.86719	11.271	13.311	14.3804	16.126	17.7646
77	6.14063	8.81543	11.186	13.2202	14.3047	16.022	17.6406
77.1	6.0874	8.72412	11.0898	13.1118	14.1772	15.8892	17.4937
77.2	6.05078	8.65381	10.9873	13.0186	14.0693	15.7954	17.353
77.3	6.0249	8.58496	10.897	12.9282	13.9741	15.6758	17.2451
77.4	6.00098	8.53369	10.8359	12.8408	13.8633	15.5737	17.1548
77.5	5.95068	8.45215	10.7578	12.7412	13.7661	15.478	17.0552
77.6	5.87207	8.38428	10.6758	12.6548	13.6626	15.3628	16.9321
77.7	5.82324	8.3335	10.5977	12.5586	13.5757	15.2773	16.813
77.8	5.74219	8.27637	10.4961	12.4609	13.46	15.1548	16.7031
77.9	5.7085	8.2085	10.4063	12.3569	13.353	15.064	16.6006
78	5.62988	8.14063	10.3164	12.2578	13.2241	14.9526	16.4829
78.1	5.59375	8.06641	10.2383	12.1899	13.1172	14.8486	16.3779
78.2	5.56152	8.02393	10.1641	12.1187	13.0435	14.7554	16.2803
78.3	5.48926	7.96875	10.0938	12.0493	12.9399	14.6416	16.1704
78.4	5.45313	7.90625	10.0078	11.9727	12.8257	14.5283	16.0459
78.5	5.41309	7.85449	9.92334	11.8906	12.7163	14.4272	15.9429
78.6	5.37207	7.79443	9.85645	11.8203	12.6265	14.3237	15.8203
78.7	5.34912	7.73193	9.7749	11.7163	12.5249	14.2148	15.7178
78.8	5.29932	7.67334	9.70703	11.6182	12.4336	14.1064	15.5898
78.9	5.25635	7.60547	9.62744	11.5327	12.3374	14.0259	15.4639
79	5.22021	7.57813	9.57422	11.4727	12.2803	13.9307	15.3789
79.1	5.20459	7.52637	9.51709	11.3828	12.2163	13.8296	15.2529
79.2	5.15479	7.4873	9.45166	11.2813	12.1265	13.7275	15.1367
79.3	5.1123	7.4209	9.37402	11.1865	12.0146	13.6343	15.0239
79.4	5.09473	7.37354	9.31494	11.1079	11.9453	13.5464	14.9102
79.5	5.04297	7.32715	9.21729	11.022	11.8584	13.4556	14.7852
79.6	5.00293	7.28809	9.16553	10.9585	11.7827	13.3843	14.6841
79.7	4.95947	7.23047	9.07813	10.8696	11.6914	13.2847	14.5586
79.8	4.9165	7.19531	9.00781	10.8022	11.6069	13.2173	14.457
79.9	4.89453	7.16553	8.95947	10.7329	11.5195	13.1172	14.396
80	4.85449	7.13574	8.89746	10.6616	11.4263	13.0142	14.2974
80.1	4.83203	7.08496	8.83838	10.5781	11.3335	12.9243	14.2007
80.2	4.80957	7.05859	8.78369	10.4946	11.2251	12.833	14.1313
80.3	4.76563	6.99609	8.71875	10.4126	11.1514	12.751	14.0381
80.4	4.73438	6.96143	8.62891	10.3296	11.0811	12.6538	13.9482
80.5	4.70313	6.91943	8.54688	10.2383	10.9819	12.5728	13.8398
80.6	4.67578	6.85938	8.5	10.1587	10.9048	12.4775	13.7524
80.7	4.63672	6.80615	8.42969	10.0952	10.8296	12.3774	13.6787
80.8	4.60791	6.76563	8.38135	10.0313	10.7397	12.2876	13.6094
80.9	4.57178	6.70996	8.32568	9.96631	10.6567	12.1938	13.5225
81	4.53271	6.66406	8.25781	9.90625	10.5913	12.104	13.4131
81.1	4.51172	6.61621	8.19922	9.82031	10.5078	12.0156	13.3359
81.2	4.49463	6.57178	8.13818	9.74072	10.4741	11.9346	13.2437
81.3	4.46631	6.51563	8.08594	9.67188	10.417	11.8774	13.1357
81.4	4.42725	6.45361	8.01563	9.59912	10.3389	11.7827	13.0303
81.5	4.39307	6.41162	7.97803	9.54053	10.2617	11.7041	12.9414
81.6	4.38135	6.35156	7.94385	9.48682	10.2109	11.6221	12.854
81.7	4.33203	6.3125	7.86328	9.40625	10.1147	11.5337	12.7632
81.8	4.32568	6.2749	7.81885	9.30859	10.0469	11.4751	12.667
81.9	4.29834	6.22314	7.76318	9.23584	9.99512	11.4126	12.5811
82	4.27197	6.16943	7.70703	9.14844	9.92334	11.3345	12.4897
82.1	4.24072	6.11182	7.64697	9.0791	9.85693	11.2563	12.4126
82.2	4.19531	6.0835	7.59131	9.04053	9.79443	11.186	12.3389
82.3	4.15771	6.05127	7.55225	8.97412	9.70459	11.1094	12.2632
82.4	4.12354	6.00146	7.48682	8.90088	9.61475	10.9971	12.1733
82.5	4.11328	5.96094	7.46484	8.85938	9.5459	10.9243	12.1162
82.6	4.07422	5.90234	7.4165	8.79932	9.49219	10.8447	12.0415
82.7	4.04053	5.85059	7.34766	8.7085	9.40137	10.7539	11.9717
82.8	3.99219	5.79688	7.28906	8.62109	9.32813	10.668	11.8843
82.9	3.97266	5.77246	7.23584	8.56934	9.25439	10.5923	11.813
83	3.94531	5.70459	7.16943	8.52734	9.18506	10.4946	11.7202
83.1	3.90234	5.66162	7.104	8.45801	9.09229	10.4048	11.6313
83.2	3.87354	5.63672	7.0376	8.41016	9.03516	10.3306	11.564
83.3	3.8335	5.59277	7.01709	8.3374	8.97559	10.2524	11.4858
83.4	3.80225	5.52246	6.9585	8.26709	8.90527	10.165	11.4038
83.5	3.7627	5.5	6.92432	8.21338	8.854	10.1025	11.3257
83.6	3.74219	5.46484	6.86963	8.17969	8.80762	10.0195	11.2437
83.7	3.71484	5.43506	6.82031	8.13135	8.73584	9.94775	11.1655
83.8	3.68359	5.41699	6.76953	8.07031	8.67578	9.86572	11.1055
83.9	3.66406	5.37256	6.72656	8.03906	8.646	9.80566	11.0459
84	3.63525	5.33594	6.70068	7.99219	8.59912	9.73828	10.9819
84.1	3.625	5.29688	6.65625	7.93213	8.5459	9.6626	10.9116
84.2	3.62402	5.29199	6.62256	7.93115	8.51074	9.62109	10.8726
84.3	3.59375	5.2373	6.58838	7.86328	8.45703	9.54785	10.7827
84.4	3.56104	5.19922	6.54541	7.80713	8.39063	9.48145	10.6992
84.5	3.54297	5.15918	6.49365	7.74902	8.32471	9.42334	10.6333
84.6	3.53662	5.125	6.43896	7.6875	8.24609	9.36182	10.5522
84.7	3.51172	5.09277	6.38525	7.60791	8.19287	9.2915	10.478
84.8	3.49219	5.07568	6.37891	7.5625	8.13428	9.23535	10.4141
84.9	3.48145	5.03369	6.31494	7.51807	8.07422	9.19238	10.3398
85	3.47656	5.00537	6.25781	7.45313	8.01953	9.12744	10.2749
85.1	3.45068	4.95361	6.17334	7.38818	7.95752	9.06396	10.2036
85.2	3.42578	4.92334	6.11963	7.3335	7.88428	9.00244	10.1563
85.3	3.396	4.89209	6.08594	7.27734	7.81787	8.92041	10.0835
85.4	3.39063	4.87109	6.04688	7.23828	7.79053	8.87207	10.0522
85.5	3.36865	4.85059	5.9873	7.17969	7.74365	8.8125	9.99365
85.6	3.3501	4.81152	5.93359	7.13672	7.69287	8.7666	9.93115
85.7	3.34229	4.78125	5.87598	7.08838	7.64453	8.7041	9.89453
85.8	3.31396	4.73438	5.82959	7.03906	7.5835	8.65479	9.83496
85.9	3.29834	4.70215	5.78516	7.01074	7.5459	8.59521	9.77246
86	3.27197	4.66406	5.75781	6.96875	7.49365	8.5415	9.69287
86.1	3.25	4.63037	5.71484	6.91406	7.43262	8.49072	9.64063
86.2	3.22119	4.59521	5.6875	6.86572	7.37744	8.42285	9.58984
86.3	3.16406	4.56396	5.625	6.81104	7.30615	8.34619	9.50537
86.4	3.15479	4.53271	5.58838	6.76953	7.25537	8.31494	9.46777
86.5	3.125	4.48193	5.56641	6.71875	7.18652	8.26416	9.37256
86.6	3.09521	4.45215	5.5249	6.69141	7.13184	8.19531	9.32568
86.7	3.05615	4.41162	5.48682	6.63818	7.08203	8.11426	9.26318
86.8	3.02979	4.36572	5.45703	6.59082	7.04297	8.0752	9.19141
86.9	3.00391	4.35693	5.4375	6.56396	7.01709	8.01807	9.13428
87	2.9624	4.32715	5.396	6.53906	6.96777	7.95703	9.08496
87.1	2.93359	4.28418	5.33838	6.47266	6.9248	7.87354	9.00293
87.2	2.91406	4.26172	5.32031	6.42188	6.86475	7.82813	8.95459
87.3	2.88135	4.24219	5.29541	6.37891	6.82031	7.79004	8.89844
87.4	2.85791	4.2085	5.25146	6.34375	6.76953	7.75635	8.8335
87.5	2.84375	4.17871	5.23828	6.28906	6.72656	7.68848	8.76318
87.6	2.83594	4.16553	5.20166	6.26172	6.7085	7.63916	8.72656
87.7	2.82422	4.146	5.17969	6.23291	6.66943	7.60791	8.70459
87.8	2.79443	4.1123	5.1499	6.17871	6.6084	7.57813	8.63574
87.9	2.75391	4.07178	5.09766	6.11963	6.55615	7.52588	8.5835
88	2.74609	4.04443	5.07031	6.09912	6.51709	7.5	8.53662
88.1	2.72412	4.03271	5.03662	6.04688	6.47559	7.45166	8.47412
88.2	2.72119	4.01318	5.01563	6.00244	6.44678	7.42432	8.43506
88.3	2.70459	3.98193	4.99609	5.94922	6.39209	7.37354	8.375
88.4	2.68896	3.95996	4.94531	5.90771	6.36084	7.33447	8.32324
88.5	2.66797	3.92725	4.90234	5.86084	6.31396	7.27197	8.26318
88.6	2.64844	3.8999	4.88672	5.83594	6.26318	7.23291	8.20459
88.7	2.63281	3.88428	4.85547	5.77734	6.23584	7.18604	8.13574
88.8	2.60938	3.84131	4.82422	5.74609	6.19043	7.14307	8.08984
88.9	2.60156	3.81396	4.79688	5.69922	6.15381	7.08447	8.0459
89	2.57031	3.77881	4.76563	5.66797	6.11084	7.03369	7.98975
89.1	2.5625	3.75146	4.72656	5.64844	6.06396	6.98291	7.93115
89.2	2.54932	3.7085	4.69678	5.625	6.021	6.93213	7.88818
89.3	2.52979	3.69141	4.6626	5.5791	5.97266	6.90332	7.87109
89.4	2.52344	3.66162	4.63672	5.53662	5.93506	6.854	7.82178
89.5	2.49609	3.63428	4.60547	5.49072	5.86475	6.78369	7.76318
89.6	2.48438	3.62256	4.58594	5.48047	5.82568	6.74463	7.72412
89.7	2.47656	3.60303	4.54688	5.45068	5.77734	6.71729	7.68506
89.8	2.45313	3.57178	4.51563	5.39844	5.73584	6.67432	7.63037
89.9	2.44531	3.55469	4.48682	5.37109	5.69678	6.61572	7.5835
90	2.43359	3.54443	4.46484	5.3501	5.65381	6.58447	7.53271
90.1	2.42578	3.5249	4.4375	5.33203	5.61865	6.54541	7.49365
90.2	2.39453	3.48584	4.39844	5.29297	5.56934	6.49463	7.44287
90.3	2.40625	3.47412	4.38672	5.26953	5.54443	6.45557	7.40381
90.4	2.39453	3.44287	4.34766	5.23047	5.51318	6.39453	7.3335
90.5	2.38037	3.43506	4.32813	5.19922	5.47412	6.36182	7.30469
90.6	2.36328	3.40381	4.28906	5.17188	5.44678	6.33447	7.2749
90.7	2.33984	3.38428	4.26563	5.14063	5.40625	6.30566	7.23193
90.8	2.32422	3.36475	4.22656	5.10156	5.38818	6.28369	7.18506
90.9	2.32031	3.34277	4.19775	5.07813	5.36475	6.23291	7.15381
91	2.30469	3.3335	4.1875	5.0625	5.3374	6.20557	7.12646
91.1	2.29297	3.3125	4.16016	5.04297	5.30615	6.17822	7.08496
91.2	2.28369	3.29443	4.14844	5.01172	5.26709	6.13525	7.03271
91.3	2.28271	3.28418	4.11865	4.97021	5.2334	6.10547	6.99121
91.4	2.26172	3.25146	4.08594	4.9375	5.19287	6.0415	6.93115
91.5	2.25635	3.23584	4.06104	4.9126	5.16943	6.00488	6.89697
91.6	2.23438	3.23193	4.03906	4.87109	5.12646	5.9751	6.85693
91.7	2.23438	3.23047	4.01709	4.85938	5.11475	5.96338	6.82568
91.8	2.22412	3.19434	3.97656	4.82959	5.06152	5.92188	6.77393
91.9	2.20557	3.16797	3.94922	4.80322	5.02734	5.8877	6.73438
92	2.19287	3.146	3.91797	4.78125	5.01318	5.854	6.7124
92.1	2.17188	3.12402	3.88428	4.74756	4.95996	5.8125	6.65918
92.2	2.17188	3.10303	3.85547	4.69922	4.92578	5.78613	6.64209
92.3	2.14063	3.07178	3.82422	4.66016	4.89209	5.74463	6.59131
92.4	2.13037	3.05225	3.81104	4.64063	4.8623	5.71729	6.56396
92.5	2.104	3.03271	3.78516	4.61963	4.82666	5.69629	6.53125
92.6	2.09375	3.01318	3.76953	4.60156	4.81787	5.67822	6.51318
92.7	2.08203	3.00146	3.74609	4.57031	4.7749	5.63525	6.48193
92.8	2.06494	2.98438	3.72656	4.55078	4.74512	5.60791	6.45459
92.9	2.05469	2.96631	3.69922	4.51318	4.70459	5.54688	6.41162
93	2.03271	2.94189	3.67725	4.49756	4.68506	5.52344	6.38184
93.1	2.01172	2.91406	3.63672	4.45947	4.65381	5.48291	6.34131
93.2	1.99609	2.92334	3.63135	4.44922	4.61475	5.46338	6.31396
93.3	1.98047	2.90381	3.60303	4.4375	4.5835	5.43213	6.271
93.4	1.95313	2.88037	3.55469	4.38672	4.55225	5.38135	6.22021
93.5	1.94531	2.86475	3.52734	4.37109	4.5249	5.36182	6.18115
93.6	1.92725	2.8335	3.48828	4.33984	4.48584	5.32275	6.13037
93.7	1.91797	2.82178	3.46484	4.31641	4.44287	5.2915	6.07959
93.8	1.91016	2.80225	3.44531	4.30078	4.40137	5.27441	6.05225
93.9	1.88281	2.7749	3.41797	4.25	4.35303	5.23291	6.00146
94	1.86719	2.76318	3.39453	4.22656	4.33203	5.20166	5.9585
94.1	1.85938	2.74121	3.38672	4.21875	4.32568	5.1626	5.93115
94.2	1.84229	2.7124	3.35547	4.17969	4.28271	5.104	5.88037
94.3	1.84375	2.70459	3.3501	4.17188	4.24756	5.07666	5.84131
94.4	1.83203	2.69141	3.33594	4.14844	4.2124	5.04541	5.82178
94.5	1.8125	2.67334	3.31641	4.11719	4.1748	5.00244	5.77881
94.6	1.80469	2.66553	3.28906	4.08984	4.15625	4.98682	5.75391
94.7	1.77344	2.646	3.25781	4.05859	4.11475	4.94385	5.70459
94.8	1.77197	2.62109	3.23682	4.04541	4.08203	4.91113	5.67188
94.9	1.73438	2.59521	3.20068	4.00146	4.04443	4.86572	5.61475
95	1.72803	2.57568	3.19922	3.979	4.01709	4.82666	5.5874
95.1	1.7124	2.55371	3.17725	3.93896	3.9834	4.80615	5.55371
95.2	1.67969	2.53271	3.14453	3.89844	3.94287	4.77197	5.51318
95.3	1.67432	2.51318	3.13672	3.88037	3.92334	4.73291	5.49365
95.4	1.66406	2.49365	3.104	3.84619	3.88672	4.70166	5.44287
95.5	1.64307	2.47266	3.07666	3.80859	3.86328	4.66113	5.40381
95.6	1.625	2.44678	3.05078	3.79297	3.84668	4.62744	5.38428
95.7	1.60693	2.42725	3.03125	3.76172	3.79834	4.60791	5.34521
95.8	1.60156	2.41553	3.01953	3.74072	3.78906	4.57275	5.33594
95.9	1.59375	2.396	2.99756	3.73438	3.77881	4.54785	5.30615
96	1.5835	2.37402	2.96094	3.68896	3.74658	4.52734	5.26465
96.1	1.56104	2.35303	2.9375	3.66016	3.69287	4.49463	5.2334
96.2	1.5625	2.3335	2.92969	3.64063	3.66553	4.4751	5.22266
96.3	1.54297	2.31396	2.91016	3.60938	3.646	4.43604	5.1748
96.4	1.53125	2.29443	2.89844	3.59229	3.63428	4.42432	5.1499
96.5	1.52344	2.29443	2.87646	3.58203	3.6123	4.40234	5.13037
96.6	1.50635	2.2749	2.8501	3.55078	3.58594	4.36182	5.10156
96.7	1.51172	2.25146	2.8335	3.53125	3.57178	4.33301	5.06152
96.8	1.50391	2.24365	2.81641	3.51172	3.55371	4.32666	5.05078
96.9	1.48438	2.22412	2.7876	3.48047	3.5249	4.29541	5.02637
97	1.47803	2.22412	2.78906	3.46094	3.50537	4.27588	5.01318
97.1	1.47266	2.19678	2.76172	3.43359	3.47412	4.24854	4.97412
97.2	1.47266	2.17334	2.73828	3.40234	3.44287	4.21338	4.95068
97.3	1.44141	2.16553	2.70703	3.37109	3.41162	4.17432	4.91162
97.4	1.44531	2.146	2.69922	3.36328	3.40381	4.14697	4.89209
97.5	1.42969	2.12256	2.68896	3.33984	3.37256	4.125	4.88037
97.6	1.41016	2.10303	2.67578	3.30859	3.35547	4.11182	4.84912
97.7	1.39063	2.0835	2.64453	3.29053	3.34277	4.07275	4.82178
97.8	1.39453	2.07568	2.63672	3.26953	3.31641	4.05322	4.80225
97.9	1.38281	2.0459	2.60547	3.25	3.29199	4.03369	4.771
98	1.37354	2.04053	2.58594	3.22656	3.271	4.00488	4.73975
98.1	1.37256	2.03027	2.57568	3.19678	3.24902	3.99219	4.70996
98.2	1.34375	2.00391	2.53516	3.16797	3.22021	3.94385	4.66943
98.3	1.33203	2.00146	2.52344	3.13672	3.20068	3.92041	4.646
98.4	1.3335	1.98193	2.50391	3.11719	3.19287	3.89307	4.61865
98.5	1.31885	1.96094	2.47363	3.08691	3.1626	3.87207	4.57813
98.6	1.3125	1.94824	2.46094	3.07422	3.15527	3.84619	4.55225
98.7	1.3125	1.94287	2.4375	3.05078	3.13428	3.8252	4.53271
98.8	1.29297	1.91943	2.41797	3.021	3.09131	3.80713	4.50391
98.9	1.29541	1.91162	2.41016	3.01172	3.0835	3.7876	4.49365
99	1.28516	1.89063	2.39063	2.98828	3.0625	3.74854	4.47412
99.1	1.27344	1.87402	2.37891	2.96875	3.04443	3.73682	4.44287
99.2	1.27344	1.87256	2.36719	2.96094	3.03809	3.71729	4.41553
99.3	1.25391	1.85303	2.33984	2.92969	3.01318	3.6875	4.38428
99.4	1.23438	1.8335	2.32031	2.91016	2.97412	3.67432	4.35303
99.5	1.22021	1.82715	2.30615	2.89844	2.9585	3.66016	4.3335
99.6	1.20068	1.79688	2.26563	2.86719	2.9248	3.63135	4.30225
99.7	1.21094	1.7959	2.25781	2.84766	2.91016	3.61182	4.28271
99.8	1.19141	1.77881	2.22656	2.82813	2.88428	3.59229	4.25537
99.9	1.19141	1.771	2.21875	2.82178	2.87646	3.57275	4.21631
100	1.19141	1.75928	2.19531	2.81641	2.86475	3.5415	4.19434
100.1	1.18994	1.75	2.18604	2.80957	2.85303	3.52441	4.17822
100.2	1.16406	1.73193	2.16016	2.78125	2.81396	3.48682	4.12793
100.3	1.15234	1.72168	2.1499	2.771	2.7959	3.46729	4.1123
100.4	1.14209	1.72021	2.13672	2.75781	2.78516	3.44385	4.08984
100.5	1.13916	1.71875	2.12744	2.74854	2.78271	3.43457	4.07422
100.6	1.13428	1.70215	2.11084	2.72021	2.75293	3.40625	4.0459
100.7	1.12891	1.7124	2.10547	2.73047	2.74219	3.40479	4.03271
100.8	1.10938	1.70313	2.07813	2.69922	2.71777	3.37354	4.00537
100.9	1.09766	1.69824	2.06641	2.68896	2.7124	3.36328	3.98193
101	1.1001	1.68896	2.06641	2.6875	2.69141	3.354	3.9624
101.1	1.08203	1.68359	2.04688	2.66797	2.65381	3.32275	3.93506
101.2	1.07422	1.69043	2.03906	2.65869	2.646	3.30322	3.91699
101.3	1.07031	1.66943	2.02881	2.65625	2.63428	3.28369	3.8999
101.4	1.06494	1.6665	2.01807	2.63916	2.61719	3.25488	3.875
101.5	1.06396	1.66162	2.00391	2.62891	2.60693	3.24463	3.85303
101.6	1.06104	1.66553	2.00781	2.62109	2.59912	3.2251	3.84521
101.7	1.04688	1.65381	1.98828	2.60156	2.57568	3.19385	3.81396
101.8	1.04297	1.64209	1.98438	2.58984	2.55615	3.1626	3.80225
101.9	1.02344	1.63428	1.96484	2.57813	2.53418	3.14307	3.771
102	1.02344	1.63184	1.95947	2.55859	2.50781	3.11572	3.75537
102.1	1.02344	1.60303	1.94922	2.53906	2.49512	3.08447	3.72412
102.2	1.021	1.58887	1.94287	2.5249	2.47168	3.07031	3.69824
102.3	1.01172	1.57959	1.91797	2.50781	2.44287	3.05322	3.68115
102.4	1.01172	1.58203	1.91406	2.49609	2.43359	3.04395	3.66943
102.5	1.00244	1.57959	1.89697	2.479	2.42578	3.03613	3.65234
102.6	1.00391	1.57178	1.89453	2.46875	2.42334	3.02197	3.63037
102.7	1.00391	1.55859	1.88672	2.46094	2.40771	3.01416	3.61475
102.8	1.00146	1.55615	1.89063	2.45557	2.38818	3.00635	3.59521
102.9	0.992188	1.54443	1.87891	2.44922	2.36475	2.98682	3.5835
103	0.980469	1.53271	1.85547	2.42969	2.34668	2.96338	3.55225
103.1	0.981934	1.52002	1.84521	2.41943	2.34277	2.95313	3.53027
103.2	0.959473	1.49365	1.82813	2.37891	2.31396	2.92432	3.50146
103.3	0.95459	1.47803	1.82422	2.36719	2.29297	2.9126	3.48193
103.4	0.960938	1.46875	1.82813	2.36084	2.29443	2.90479	3.4624
103.5	0.947754	1.45459	1.81641	2.34766	2.2749	2.88281	3.44287
103.6	0.941406	1.44287	1.80225	2.33594	2.25146	2.86182	3.43115
103.7	0.953125	1.44287	1.78516	2.32813	2.24365	2.84229	3.42578
103.8	0.941406	1.42334	1.77344	2.30859	2.2124	2.8252	3.4209
103.9	0.945313	1.41309	1.76563	2.29932	2.20459	2.83447	3.40381
104	0.931152	1.39209	1.74609	2.27344	2.18506	2.8125	3.37256
104.1	0.914063	1.37256	1.73828	2.25	2.16553	2.78369	3.35303
104.2	0.910156	1.37256	1.73438	2.23828	2.15381	2.77197	3.34131
104.3	0.904785	1.35156	1.71729	2.22119	2.13672	2.75488	3.32422
104.4	0.914063	1.35156	1.72656	2.22266	2.13818	2.75635	3.32568
104.5	0.894531	1.3374	1.71875	2.21094	2.10693	2.73682	3.30469
104.6	0.900879	1.32568	1.70557	2.19922	2.09668	2.7251	3.28418
104.7	0.884277	1.31543	1.68896	2.18115	2.08496	2.70166	3.26465
104.8	0.881348	1.30078	1.67432	2.15869	2.07813	2.68066	3.25781
104.9	0.876465	1.28809	1.66699	2.14209	2.06543	2.66943	3.24512
105	0.872559	1.28271	1.64697	2.13818	2.05225	2.6626	3.21875
105.1	0.854004	1.2749	1.65625	2.11182	2.03516	2.64404	3.19531
105.2	0.855469	1.26318	1.63672	2.10156	2.0249	2.61572	3.18506
105.3	0.849121	1.26318	1.625	2.08984	2.021	2.604	3.17334
105.4	0.820313	1.25146	1.61328	2.06641	2.00146	2.57275	3.15381
105.5	0.834473	1.25391	1.60791	2.06104	1.99609	2.56738	3.14844
105.6	0.830566	1.25537	1.60938	2.05078	1.97412	2.55713	3.13574
105.7	0.816406	1.24219	1.59766	2.03125	1.95459	2.5376	3.10693
105.8	0.804688	1.21631	1.57813	2.01172	1.9375	2.50635	3.09521
105.9	0.796875	1.2085	1.55859	1.99219	1.92725	2.48682	3.07568
106	0.786621	1.19824	1.54688	1.98193	1.91699	2.46875	3.05762
106.1	0.800781	1.19287	1.54688	1.98584	1.92334	2.46338	3.06006
106.2	0.786621	1.18115	1.53662	1.96484	1.91162	2.44385	3.04053
106.3	0.78125	1.18506	1.54541	1.95557	1.90137	2.44141	3.03271
106.4	0.771973	1.17578	1.52979	1.94141	1.88672	2.41504	3.01563
106.5	0.782715	1.18408	1.52881	1.9585	1.88428	2.41406	3.02246
106.6	0.761719	1.15381	1.50781	1.92822	1.86475	2.38525	2.99365
106.7	0.742188	1.13428	1.48828	1.91016	1.85693	2.36572	2.97412
106.8	0.752441	1.13672	1.48828	1.90234	1.85303	2.35645	2.95313
106.9	0.740723	1.13428	1.47656	1.91016	1.83594	2.354	2.94287
107	0.734375	1.13184	1.46875	1.90869	1.8374	2.34863	2.93506
107.1	0.734375	1.12256	1.46875	1.89844	1.83105	2.34375	2.92334
107.2	0.722656	1.11084	1.45703	1.87891	1.81641	2.31494	2.90381
107.3	0.716309	1.10449	1.43896	1.87256	1.81543	2.30469	2.88574
107.4	0.710938	1.11084	1.42578	1.85938	1.81396	2.29395	2.87793
107.5	0.703125	1.11084	1.42334	1.85693	1.81396	2.29541	2.86084
107.6	0.700684	1.10303	1.39453	1.82813	1.79199	2.27588	2.84131
107.7	0.671875	1.08984	1.38672	1.82813	1.77344	2.26416	2.82178
107.8	0.671875	1.07324	1.375	1.80859	1.76074	2.24463	2.79053
107.9	0.660156	1.07959	1.36328	1.80322	1.75146	2.24463	2.79053
108	0.660156	1.07959	1.36328	1.80078	1.74365	2.23828	2.771
108.1	0.652344	1.07813	1.35547	1.78906	1.72412	2.23291	2.75146
108.2	0.640625	1.06396	1.34229	1.78125	1.7124	2.21338	2.73975
108.3	0.628906	1.06006	1.32422	1.77734	1.70068	2.20947	2.72803
108.4	0.617188	1.05225	1.3125	1.75781	1.68896	2.18848	2.7085
108.5	0.609375	1.05225	1.30469	1.74609	1.68115	2.1626	2.68896
108.6	0.600098	1.04297	1.29541	1.74072	1.66406	2.15723	2.67188
108.7	0.601563	1.04443	1.30859	1.75	1.67188	2.15479	2.67334
108.8	0.601563	1.04199	1.29688	1.72803	1.646	2.13525	2.64063
108.9	0.582031	1.01563	1.27734	1.71875	1.63428	2.125	2.61621
109	0.582031	1.0249	1.26953	1.69922	1.62646	2.10645	2.61084
109.1	0.574219	1.01318	1.25537	1.69922	1.61475	2.09619	2.5835
109.2	0.574219	1.01855	1.24756	1.69287	1.62012	2.0874	2.56543
109.3	0.570313	1.01855	1.25391	1.69531	1.6123	2.08301	2.56006
109.4	0.572754	1.00391	1.23682	1.68994	1.59375	2.08447	2.54932
109.5	0.585938	1.01318	1.24463	1.69922	1.60303	2.07666	2.54443
109.6	0.574219	0.993652	1.23047	1.68994	1.59521	2.06738	2.5249
109.7	0.574219	0.988281	1.21875	1.67969	1.59131	2.06494	2.51318
109.8	0.574219	0.98584	1.21875	1.67969	1.5835	2.06494	2.50537
109.9	0.57666	0.984375	1.229	1.68213	1.58594	2.05566	2.49609
110	0.595215	0.997559	1.23047	1.68359	1.59521	2.05713	2.49756
110.1	0.574219	0.983398	1.21875	1.67334	1.57422	2.04932	2.47412
110.2	0.566406	0.980469	1.22266	1.67188	1.56787	2.04932	2.47803
110.3	0.568848	0.975586	1.21094	1.65234	1.56006	2.02979	2.46631
110.4	0.574219	0.974121	1.21094	1.64844	1.54834	2.02588	2.45459
110.5	0.575684	0.974121	1.22266	1.65234	1.54834	2.01807	2.44678
110.6	0.5625	0.974121	1.21875	1.64844	1.54834	2.00635	2.43506
110.7	0.552246	0.97168	1.20459	1.63818	1.53418	1.99609	2.41309
110.8	0.542969	0.962402	1.19922	1.62891	1.51709	1.96729	2.396
110.9	0.542969	0.95459	1.1875	1.62109	1.49756	1.95557	2.38428
111	0.554688	0.962402	1.19922	1.62891	1.50537	1.96729	2.38428
111.1	0.542969	0.95459	1.1875	1.62109	1.4834	1.94775	2.36475
111.2	0.550781	0.950684	1.17578	1.61719	1.47412	1.93604	2.37256
111.3	0.539063	0.942871	1.17578	1.60547	1.45068	1.9126	2.35303
111.4	0.542969	0.942871	1.17969	1.60938	1.45459	1.90234	2.35449
111.5	0.554688	0.942871	1.17969	1.60938	1.44678	1.88525	2.36475
111.6	0.550781	0.942871	1.1875	1.59619	1.44287	1.88525	2.36084
111.7	0.540527	0.928711	1.16553	1.5874	1.4209	1.87109	2.33887
111.8	0.540039	0.921875	1.1665	1.56885	1.41406	1.85254	2.32813
111.9	0.515625	0.903809	1.14844	1.54297	1.396	1.82666	2.31396
112	0.523438	0.903809	1.15625	1.53906	1.38428	1.82275	2.30225
112.1	0.515625	0.89209	1.14844	1.53125	1.37109	1.80322	2.28271
112.2	0.515625	0.895996	1.14844	1.53271	1.36865	1.79541	2.28271
112.3	0.51709	0.884277	1.14063	1.51953	1.35693	1.78369	2.26318
112.4	0.51416	0.884277	1.14063	1.51953	1.33887	1.77832	2.25146
112.5	0.503906	0.872559	1.13672	1.50781	1.34521	1.77344	2.25391
112.6	0.501465	0.872559	1.13672	1.50781	1.3335	1.75488	2.25146
112.7	0.492188	0.872559	1.13818	1.5	1.32568	1.76563	2.24365
112.8	0.484375	0.864746	1.13135	1.48828	1.31396	1.74463	2.2334
112.9	0.492188	0.86084	1.13672	1.48828	1.31396	1.73291	2.22266
113	0.492188	0.864746	1.13428	1.48828	1.30615	1.73291	2.22412
113.1	0.489746	0.850586	1.11475	1.46631	1.29053	1.72266	2.20996
113.2	0.475098	0.832031	1.09619	1.4541	1.25781	1.7041	2.18359
113.3	0.493652	0.842773	1.10693	1.46777	1.26611	1.70166	2.18262
113.4	0.475098	0.824219	1.08838	1.43994	1.25781	1.68066	2.16797
113.5	0.484375	0.833496	1.09766	1.44922	1.26318	1.67822	2.1709
113.6	0.496094	0.833496	1.09766	1.46338	1.25537	1.67822	2.15381
113.7	0.484375	0.833496	1.09766	1.45313	1.24756	1.65869	2.13428
113.8	0.476563	0.825684	1.07813	1.44141	1.23584	1.64697	2.11475
113.9	0.472656	0.821777	1.08594	1.44922	1.22412	1.63525	2.11084
114	0.460938	0.813965	1.07422	1.44141	1.2124	1.62744	2.09131
114.1	0.462402	0.811523	1.07568	1.43896	1.2124	1.61328	2.08887
114.2	0.441406	0.802246	1.05469	1.41797	1.18506	1.58594	2.06006
114.3	0.446777	0.800781	1.05469	1.40625	1.18506	1.59082	2.06006
114.4	0.439941	0.8125	1.06494	1.40869	1.18359	1.58447	2.05859
114.5	0.445313	0.806152	1.05859	1.41553	1.16943	1.59619	2.04297
114.6	0.433594	0.79834	1.05078	1.40869	1.15918	1.58838	2.01855
114.7	0.433594	0.806152	1.04688	1.40234	1.16553	1.57666	2.021
114.8	0.421875	0.794434	1.04541	1.39063	1.15381	1.56494	2
114.9	0.419434	0.78418	1.02637	1.38037	1.14355	1.55078	1.98486
115	0.396973	0.763184	1.01563	1.35938	1.12256	1.53369	1.97021
115.1	0.394531	0.76709	1.01563	1.35938	1.11475	1.52588	1.97412
115.2	0.384277	0.755371	0.994629	1.35156	1.10303	1.5127	1.95068
115.3	0.38916	0.761719	0.996094	1.34619	1.1001	1.5127	1.94775
115.4	0.371094	0.743652	0.988281	1.33203	1.07568	1.48682	1.91553
115.5	0.382813	0.749023	0.986816	1.33203	1.07959	1.49072	1.91699
115.6	0.373535	0.743652	0.974121	1.32422	1.06787	1.479	1.91553
115.7	0.355469	0.743652	0.96875	1.31006	1.05762	1.46729	1.89209
115.8	0.36084	0.743652	0.972656	1.29834	1.04199	1.45068	1.88818
115.9	0.34375	0.731934	0.945313	1.27734	1.03271	1.4126	1.87402
116	0.332031	0.731934	0.9375	1.26563	1.01318	1.40723	1.86865
116.1	0.332031	0.724121	0.92334	1.25781	1.01318	1.4165	1.86084
116.2	0.3125	0.712402	0.914063	1.25781	1.00146	1.40479	1.85156
116.3	0.321777	0.72168	0.915527	1.25391	0.991211	1.39453	1.85986
116.4	0.303223	0.695313	0.896973	1.24072	0.976563	1.3877	1.83203
116.5	0.317871	0.709961	0.903809	1.2334	0.979492	1.39063	1.83887
116.6	0.303223	0.691406	0.885254	1.21729	0.964844	1.37354	1.82031
116.7	0.324219	0.70459	0.894531	1.23047	0.974121	1.37354	1.82959
116.8	0.3125	0.70459	0.885254	1.21875	0.966309	1.36572	1.82178
116.9	0.316406	0.70459	0.876465	1.21729	0.966309	1.36572	1.82178
117	0.304688	0.696777	0.847656	1.20313	0.95459	1.35791	1.81396
117.1	0.3125	0.702148	0.855469	1.19678	0.95459	1.354	1.80859
117.2	0.296875	0.67334	0.828125	1.17188	0.935059	1.34863	1.7749
117.3	0.285156	0.67334	0.820313	1.17188	0.927246	1.34375	1.7749
117.4	0.283691	0.675781	0.818848	1.17041	0.925781	1.33691	1.77734
117.5	0.292969	0.67334	0.816406	1.17188	0.927246	1.32666	1.7749
117.6	0.285156	0.67334	0.808594	1.16016	0.915527	1.32666	1.76074
117.7	0.274902	0.663086	0.79834	1.15918	0.916992	1.31641	1.74512
117.8	0.292969	0.67334	0.808594	1.16016	0.92334	1.32422	1.75146
117.9	0.285156	0.67334	0.796875	1.14697	0.915527	1.30322	1.75146
118	0.273438	0.661621	0.789063	1.14063	0.903809	1.29541	1.74219
118.1	0.270996	0.653809	0.777344	1.14063	0.895996	1.28223	1.72412
118.2	0.269531	0.661621	0.782715	1.13672	0.903809	1.27197	1.73193
118.3	0.26416	0.652344	0.770508	1.12891	0.894531	1.2666	1.71484
118.4	0.261719	0.661621	0.774902	1.11719	0.893555	1.26416	1.7124
118.5	0.273438	0.67334	0.777344	1.11963	0.884277	1.27588	1.71631
118.6	0.273438	0.665527	0.765625	1.10156	0.876465	1.26807	1.70215
118.7	0.261719	0.653809	0.760254	1.10156	0.863281	1.25635	1.68506
118.8	0.263184	0.653809	0.756836	1.09277	0.838867	1.25	1.6748
118.9	0.269531	0.655273	0.76416	1.09766	0.853027	1.25	1.68896
119	0.271973	0.649902	0.753906	1.08447	0.841309	1.229	1.68115
119.1	0.268066	0.635254	0.744629	1.06885	0.832031	1.21973	1.66797
119.2	0.261719	0.622559	0.726563	1.0625	0.825684	1.20166	1.66016
119.3	0.270996	0.624023	0.738281	1.06006	0.825684	1.2041	1.646
119.4	0.253906	0.614746	0.726563	1.03906	0.817871	1.19775	1.646
119.5	0.261719	0.61084	0.726563	1.03906	0.813965	1.19385	1.64209
119.6	0.261719	0.622559	0.726563	1.04932	0.817871	1.19531	1.646
119.7	0.255371	0.616211	0.717773	1.03027	0.819336	1.17578	1.63574
119.8	0.261719	0.609375	0.714844	1.01953	0.811523	1.17432	1.63184
119.9	0.248535	0.595215	0.703125	1.00781	0.802246	1.1626	1.61084
120	0.242188	0.581055	0.695313	1.00537	0.789063	1.14307	1.60303
120.1	0.246094	0.583496	0.695313	1	0.786621	1.15479	1.60303
120.2	0.248535	0.57666	0.697754	0.990723	0.778809	1.13623	1.58447
120.3	0.253906	0.603027	0.695313	1.00781	0.794434	1.14697	1.5835
120.4	0.253906	0.592773	0.682129	0.996094	0.785156	1.13672	1.57568
120.5	0.255371	0.584961	0.669434	0.988281	0.795898	1.13525	1.56543
120.6	0.261719	0.601563	0.675781	1	0.794434	1.13281	1.57324
120.7	0.26416	0.575684	0.671875	0.98291	0.785156	1.11816	1.55469
120.8	0.263184	0.578125	0.678223	0.992188	0.78418	1.11572	1.55371
120.9	0.252441	0.585938	0.697754	0.992188	0.773438	1.11182	1.54297
121	0.261719	0.587402	0.696777	1	0.773438	1.10254	1.53906
121.1	0.269531	0.588867	0.693848	1	0.766113	1.09766	1.53809
121.2	0.269531	0.59375	0.717285	0.990723	0.752441	1.09473	1.53125
121.3	0.263184	0.590332	0.713867	0.981934	0.728516	1.08203	1.52246
121.4	0.277344	0.606934	0.73291	0.988281	0.703125	1.0625	1.51709
121.5	0.279785	0.625	0.763184	0.984375	0.686523	1.0415	1.52246
121.6	0.28125	0.643555	0.791504	1	0.703125	1.04541	1.51318
121.7	0.286621	0.622559	0.816406	0.993652	0.681152	1.0415	1.49609
121.8	0.26416	0.591309	0.800781	0.958008	0.665527	1.03613	1.46484
121.9	0.265625	0.57959	0.78125	0.958496	0.643555	1.03369	1.46387
122	0.26709	0.559082	0.747559	0.924805	0.618652	1.021	1.43799
122.1	0.25	0.53125	0.705566	0.911133	0.614746	1.00732	1.42432
122.2	0.226563	0.526367	0.692871	0.905273	0.61084	1.02197	1.4209
122.3	0.205566	0.490723	0.652344	0.873535	0.582031	0.992188	1.39063
122.4	0.17334	0.492676	0.634277	0.86084	0.569336	0.975098	1.38184
122.5	0.160156	0.480469	0.621094	0.877441	0.571777	0.993164	1.36475
122.6	0.14209	0.470215	0.597656	0.859375	0.544434	0.986816	1.35059
122.7	0.123535	0.449219	0.596191	0.861816	0.539063	0.967285	1.32275
122.8	0.114746	0.456055	0.583496	0.86084	0.559082	0.976563	1.33643
122.9	0.133789	0.476563	0.57666	0.873535	0.57666	0.985352	1.35547
123	0.121582	0.47168	0.567871	0.872559	0.584961	0.988281	1.35059
123.1	0.116699	0.470215	0.5625	0.879883	0.574219	0.991699	1.34229
123.2	0.155273	0.476563	0.597656	0.899902	0.595215	1.00146	1.34668
123.3	0.13916	0.483398	0.597656	0.864746	0.588867	0.963379	1.3374
123.4	0.122559	0.462402	0.587402	0.828125	0.587402	0.954102	1.30371
123.5	0.123535	0.466309	0.606445	0.834473	0.613281	0.975098	1.31396
123.6	0.114746	0.476563	0.613281	0.839844	0.603027	0.961914	1.32275
123.7	0.132813	0.48584	0.628906	0.84375	0.609375	0.966309	1.30762
123.8	0.137695	0.48584	0.632813	0.835938	0.620117	0.958008	1.31641
123.9	0.14502	0.480957	0.634277	0.837402	0.612305	0.953125	1.30127
124	0.143066	0.472656	0.648438	0.832031	0.605469	0.955566	1.28271
124.1	0.132813	0.452148	0.65625	0.828125	0.608398	0.955566	1.28516
124.2	0.131348	0.441406	0.63916	0.820313	0.603027	0.954102	1.28271
124.3	0.117188	0.435059	0.609375	0.80957	0.601563	0.936035	1.27344
124.4	0.114746	0.42334	0.609375	0.811523	0.595215	0.9375	1.26855
124.5	0.0952148	0.42334	0.61084	0.803223	0.575684	0.932129	1.26074
124.6	0.109375	0.428711	0.613281	0.821777	0.584961	0.939941	1.26172
124.7	0.105469	0.410156	0.605469	0.8125	0.57959	0.930664	1.26855
124.8	0.104004	0.407715	0.62207	0.822754	0.563965	0.939941	1.26807
124.9	0.09375	0.424805	0.62793	0.817871	0.563965	0.936035	1.27393
125	0.09375	0.42334	0.617188	0.806152	0.544434	0.936035	1.26318
125.1	0.09375	0.433594	0.613281	0.807129	0.556152	0.933594	1.26416
125.2	0.106934	0.431152	0.613281	0.808594	0.557617	0.932129	1.28418
125.3	0.0908203	0.429688	0.614258	0.797852	0.551758	0.933105	1.27734
125.4	0.09375	0.42627	0.621094	0.810059	0.567871	0.9375	1.2749
125.5	0.0976563	0.42334	0.620117	0.786621	0.569336	0.941406	1.26318
125.6	0.105469	0.421875	0.604004	0.768066	0.560059	0.922852	1.26318
125.7	0.105469	0.413086	0.605469	0.76709	0.556152	0.924316	1.26318
125.8	0.121094	0.419434	0.59375	0.747559	0.577148	0.924316	1.25293
125.9	0.119629	0.414063	0.583496	0.750977	0.591309	0.910156	1.26563
126	0.136719	0.415527	0.57666	0.730469	0.554688	0.883789	1.26709
126.1	0.13916	0.425781	0.611816	0.730469	0.546875	0.885254	1.23047
126.2	0.137207	0.456055	0.59668	0.760742	0.56543	0.88916	1.25684
126.3	0.105469	0.416992	0.578125	0.714844	0.561523	0.867188	1.22705
126.4	0.0922852	0.398438	0.541504	0.662598	0.535156	0.804688	1.19531
126.5	0.104004	0.382813	0.525879	0.679688	0.554688	0.713379	1.18359
126.6	0.117188	0.395996	0.51709	0.675781	0.563965	0.678223	1.18652
126.7	0.125	0.388184	0.496094	0.657715	0.540527	0.625	1.14209
126.8	0.118652	0.399902	0.492188	0.65625	0.53418	0.592285	1.15234
126.9	0.0913086	0.431152	0.449707	0.643555	0.500488	0.645996	1.12549
127	0.178223	0.519531	0.415039	0.649902	0.525879	0.71875	1.16162
127.1	0.479492	0.790527	0.432617	0.696777	0.81543	1.15869	1.41016
127.2	-0.0117188	0.436523	0.32959	0.417969	0.532715	0.828125	1.19824
127.3	0.237305	0.385742	0.546875	1.00586	0.749023	0.9375	1.35596
127.4	0.203125	0.416504	0.597656	0.916504	0.715332	0.949219	1.3374
127.5	0.407227	0.682129	0.567871	0.893066	0.805176	1.10107	1.5376
127.6	1.07227	1.28906	0.428223	0.689941	1.44775	1.8252	2.20654
127.7	0.561035	0.610352	0.347656	0.159668	0.804688	1.37842	1.92725
127.8	-0.0625	0.177246	0.941406	1.29004	0.25293	0.54541	1.01855
127.9	0.241211	0.493652	0.583496	0.956055	0.466309	0.814941	1.20996
128	0.1875	0.497559	0.525879	0.79834	0.484375	0.838379	1.12109
128.1	0.196777	0.483398	0.571777	0.808594	0.567871	0.820313	1.14746
128.2	0.20166	0.505371	0.588379	0.828125	0.634277	0.890137	1.15234
128.3	0.222656	0.51709	0.584961	0.790527	0.67334	0.941406	1.1748
128.4	0.177734	0.523438	0.443848	0.67041	0.637695	0.924316	1.10547
128.5	0.179688	0.574707	0.433594	0.605957	0.544434	0.932617	1.06543
128.6	0.234375	0.744629	0.87207	0.958008	0.73291	0.953613	1.30225
128.7	-0.632813	0.521484	-1.01025	-0.408691	-0.081543	0.864258	0.404297
128.8	0.0664063	0.561523	0.448242	0.195313	0.447266	0.924316	1.13965
128.9	0.136719	0.561523	0.48291	0.633301	0.636719	0.977539	1.20898
129	0.174316	0.520996	0.535156	0.705566	0.688965	1.01953	1.2959
129.1	0.208496	0.522461	0.553223	0.746094	0.688965	1.00488	1.23584
129.2	0.171875	0.499023	0.559082	0.772461	0.702148	0.97168	1.24121
129.3	0.176758	0.467285	0.532227	0.786133	0.699219	0.933105	1.23682
129.4	0.155273	0.479492	0.533691	0.792969	0.696777	0.936035	1.26221
129.5	0.143066	0.481934	0.536621	0.782715	0.67334	0.941406	1.23193
129.6	0.135742	0.478027	0.520996	0.774902	0.666992	0.928223	1.22803
129.7	0.0869141	0.45459	0.5	0.760254	0.632813	0.88916	1.20459
129.8	0.100586	0.438965	0.484375	0.755371	0.618652	0.900879	1.20068
129.9	0.0610352	0.419434	0.48291	0.717285	0.584961	0.877441	1.16943
130	0.0727539	0.427246	0.507813	0.71875	0.566406	0.895508	1.17188
130.1	0.0639648	0.37793	0.470215	0.665527	0.500488	0.839844	1.10449
130.2	-0.208008	0.373047	0.242188	0.461426	0.322266	0.830566	0.874023
130.3	-1.04834	0.199707	-0.48584	-0.46875	-0.383789	0.802246	-0.154297
130.4	-1.15479	-0.646973	-0.509277	-1.04443	-0.680664	0.759277	-0.574219
130.5	0.597656	0.364746	1.40869	1.65332	0.926758	0.936035	2.00879
130.6	0.207031	0.307129	0.675781	1.37793	0.670898	0.875	1.46729
130.7	0.137207	0.398926	0.630859	1.05078	0.514648	0.748535	1.45508
130.8	0.0351563	0.370605	0.333984	0.669922	0.410645	0.84668	0.906738
130.9	0.0498047	0.339844	0.459473	0.541504	0.505859	0.806152	0.945801
131	0.043457	0.116699	0.522461	0.745117	0.630859	0.492676	1.14258
131.1	0.383301	0.646484	-0.581543	-0.28125	-0.379883	0.95752	0.17334
131.2	0.179688	0.609375	0.443848	0.425781	0.59375	0.933594	1.12891
131.3	0.139648	0.397461	0.556152	0.8125	0.708496	0.770996	1.1543
131.4	0.0664063	0.367188	0.488281	0.794434	0.739746	0.713379	1.01318
131.5	0.0600586	0.382813	0.557129	0.710938	0.678711	0.721191	1.02881
131.6	0.0400391	0.425781	0.550781	0.729004	0.628906	0.745605	1.0625
131.7	-0.00537109	0.428711	0.51416	0.726563	0.614746	0.760254	1.05225
131.8	0.114746	0.446777	0.56543	0.789063	0.620117	0.808594	1.13281
131.9	0.121094	0.436523	0.478027	0.761719	0.569336	0.762695	1.16943
132	0.257813	0.462402	0.209473	0.5625	0.437988	0.839355	1.04688
132.1	0.413086	0.657715	-0.209473	-0.0546875	0.119141	0.994629	0.62793
132.2	-0.00390625	0.338867	0.397949	0.163574	0.56543	0.74707	1.22168
132.3	-0.0859375	0.246094	0.533691	0.904785	0.489746	0.699219	1.0874
132.4	-0.0458984	0.321777	0.374512	0.742188	0.51416	0.743164	1.03516
132.5	-0.00244141	0.345215	0.480469	0.632813	0.560059	0.758789	1.08496
132.6	-0.0175781	0.351563	0.508789	0.687012	0.611816	0.770508	1.15723
132.7	-0.09375	0.375488	0.526367	0.735352	0.716309	0.778809	1.20752
132.8	-0.246094	0.199219	0.395996	0.601563	0.662598	0.662598	1.01465
132.9	0.291504	0.794434	0.796875	0.945313	0.686523	1.03223	1.25928
133	0.435059	0.661621	0.0390625	0.510254	0.124023	1.21094	0.941406
133.1	0.253906	0.574219	-0.112305	0.269531	0.353027	0.926758	1.16797
133.2	0.571777	0.288086	0.528809	1.04688	0.700684	1.27588	1.50293
133.3	-0.607422	0.26416	1.15332	2.02588	1.354	0.303223	1.78662
133.4	0.0795898	0.428711	1.34229	1.28662	0.328125	0.740723	0.997559
133.5	0.112305	0.428711	0.42041	0.613281	0.53418	0.84375	1.18262
133.6	-0.03125	0.403809	0.622559	0.649902	0.532715	0.726563	1.22949
133.7	0.0620117	0.407715	0.40332	0.717285	0.564941	0.671387	1.15479
133.8	0.157715	0.466309	0.307617	0.665527	0.541992	0.683594	1.07861
133.9	0.126953	0.480469	0.347168	0.727539	0.526855	0.688477	1.11816
134	-0.19043	0.240723	0.608887	0.950195	0.503906	0.553223	1.229
134.1	-0.941406	-0.539063	1.39746	1.65918	0.94043	-0.0654297	1.44824
134.2	-0.546875	0.000488281	2.1543	2.33203	0.939453	0.125	1.30371
134.3	0.0273438	0.481934	0.849121	0.937012	0.114258	0.671387	0.754883
134.4	0.897461	1.20215	-2.18164	-2.02979	-1.82666	1.59766	-0.829102
134.5	-0.0180664	0.402832	-1.38135	-0.73291	0.493652	0.72998	1.29736
134.6	-0.0664063	0.331055	0.657715	0.87207	0.483398	0.564941	1.18994
134.7	0.0166016	0.311035	0.660156	0.707031	0.472656	0.671387	1.04004
134.8	0.0834961	0.393555	0.569336	0.716309	0.553711	0.834961	1.1543
134.9	-0.00146484	0.403809	0.510254	0.700684	0.535156	0.679688	1.08984
135	-0.255371	0.305664	0.628418	0.748047	0.662598	0.580078	1.19482
135.1	-0.479492	-0.0498047	0.946289	1.47119	1.06152	0.471191	1.42822
135.2	-0.0688477	0.328613	1.25	1.91992	0.567871	0.635742	1.18311
135.3	-0.129883	0.216309	0.979004	1.11572	0.665527	0.53125	1.29736
135.4	-0.300781	0.214355	0.608398	0.991211	0.57959	0.340332	1.10693
135.5	-0.312988	0.208496	0.42041	0.847656	0.481934	0.310547	1.03467
135.6	-0.167969	0.22998	0.484375	0.779297	0.430664	0.249512	1.04443
135.7	-0.0922852	0.165527	0.466309	0.706055	0.391113	0.333496	1.02246
135.8	-0.11084	0.122559	0.506348	0.666016	0.511719	0.387695	1.03516
135.9	-0.114258	0.138184	0.34668	0.46875	0.459961	0.45166	0.973145
136	0.0415039	0.410156	0.190918	0.400879	0.363281	0.589355	0.949219
136.1	0.231445	0.583496	0.207031	0.36084	0.273438	0.721191	0.919434
136.2	0.249023	0.575684	0.295898	0.313965	0.26709	0.683594	0.95459
136.3	0.0180664	0.470215	0.412598	0.297852	0.202148	0.516602	0.935059
136.4	0.0600586	0.45459	0.507813	0.506836	0.32959	0.549316	0.993652
136.5	-0.03125	0.368652	0.446777	0.488281	0.276367	0.535156	0.936523
136.6	-0.0498047	0.34375	0.443848	0.481445	0.279785	0.481445	0.942383
136.7	-0.0854492	0.33252	0.44043	0.495117	0.254395	0.493652	0.949707
136.8	-0.0927734	0.316406	0.414063	0.466309	0.26709	0.485352	0.913086
136.9	-0.0913086	0.302246	0.373535	0.467285	0.275879	0.49707	0.899902
137	-0.0830078	0.276367	0.359375	0.470215	0.198242	0.498535	0.903809
137.1	-0.0834961	0.289063	0.269531	0.467285	0.181152	0.373535	0.899902
137.2	-0.0976563	0.239746	0.256348	0.433594	0.132813	0.305664	0.890625
137.3	-0.0625	0.0693359	0.260742	0.32959	0.14502	0.321777	0.918457
137.4	-0.0756836	0.09375	0.311035	0.351563	0.186035	0.344727	0.924316
137.5	-0.176758	0.313965	0.489746	0.523438	0.34668	0.424316	0.92334
137.6	-0.210938	0.31543	0.492188	0.453125	0.333496	0.386719	0.887207
137.7	-0.124023	0.355469	0.502441	0.391602	0.253906	0.43457	0.873535
137.8	0.0131836	0.438965	0.532715	0.239746	0.228027	0.447754	0.881836
137.9	-0.0117188	0.474121	0.521973	0.214844	0.196777	0.744629	0.837402
138	-0.00537109	0.393555	0.496094	0.603027	0.419434	0.744629	0.828125
138.1	0.152344	0.332031	0.4375	0.674316	0.432617	0.693848	0.78418
138.2	0.164063	0.457031	0.445313	0.717285	0.470215	0.686035	0.834473
138.3	0.177246	0.453613	0.417969	0.69043	0.45459	0.667969	0.969238
138.4	0.0336914	0.271973	0.386719	0.541504	0.335938	0.515137	0.861816
138.5	0.0351563	0.294434	0.416504	0.557129	0.381836	0.523438	0.874023
138.6	0.015625	0.276367	0.372559	0.549805	0.415527	0.505371	0.866211
138.7	-0.00244141	0.274902	0.378906	0.539063	0.384277	0.48291	0.884277
138.8	0.0102539	0.270996	0.385254	0.518066	0.394531	0.481445	0.888184
138.9	-0.0078125	0.208496	0.367188	0.510254	0.393555	0.43457	0.871094
139	-0.0390625	0.20459	0.354492	0.528809	0.364746	0.416504	0.864746
139.1	-0.0273438	0.214844	0.355469	0.535156	0.36084	0.443848	0.885742
139.2	-0.0288086	0.206055	0.34375	0.507813	0.345215	0.443848	0.880371
139.3	-0.0205078	0.156738	0.324219	0.470215	0.331055	0.421875	0.850586
139.4	-0.0571289	0.175781	0.302246	0.476563	0.321777	0.408691	0.871094
139.5	-0.0419922	0.197754	0.311035	0.472656	0.318848	0.459473	0.890625
139.6	-0.0219727	0.245117	0.322754	0.476563	0.350586	0.479004	0.911621
139.7	-0.0351563	0.231934	0.324219	0.460938	0.32959	0.454102	0.893555
139.8	-0.0327148	0.270996	0.319336	0.484375	0.345215	0.471191	0.886719
139.9	-0.0234375	0.257813	0.312012	0.493164	0.369629	0.461914	0.890625
140	-0.0234375	0.264648	0.331055	0.497559	0.374023	0.463379	0.862305
140.1	-0.03125	0.273438	0.304688	0.501465	0.366211	0.463379	0.866211
140.2	-0.0625	0.263184	0.292969	0.506348	0.351563	0.460938	0.855469
140.3	-0.0639648	0.238281	0.307129	0.494629	0.32959	0.460449	0.845215
140.4	-0.0649414	0.25293	0.307617	0.495117	0.327148	0.435059	0.831055
140.5	-0.0869141	0.280273	0.261719	0.457031	0.282715	0.502441	0.768555
140.6	-0.1875	0.588867	0.192871	0.386719	0.22168	0.518066	0.674805
140.7	0.210938	2.28809	0.19873	0.361816	0.17041	0.839844	0.609375
140.8	1.59424	2.25293	-0.0219727	0.188965	0.439453	1.85449	0.517578
140.9	0.234863	-0.521973	-1.1377	-0.341797	0.616211	-0.242188	0.0683594
141	-1.4707	-1.53809	0.183105	0.474609	-0.713379	-1.1499	0.60498
141.1	-0.685547	0.121094	0.669922	0.65625	-0.000488281	-0.0214844	0.706543
141.2	0.258789	1.01416	0.59082	0.45166	0.360352	0.944824	0.369629
141.3	0.352539	1.01514	-0.0185547	0.443359	0.429688	0.979004	0.485352
141.4	0.185059	0.632813	-0.0439453	0.436523	0.29834	0.674805	0.364746
141.5	0.09375	0.349121	0.0883789	0.356934	0.226563	0.467285	0.401367
141.6	0.0585938	0.391113	0.225098	0.588379	0.286621	0.534668	0.71875
141.7	0.00341797	0.378906	0.185547	0.544922	0.288574	0.482422	0.708496
141.8	-0.0561523	0.32666	0.209961	0.523438	0.257813	0.42041	0.720215
141.9	-0.0649414	0.333496	0.247559	0.533691	0.300781	0.393066	0.785156
142	-0.0361328	0.352051	0.296875	0.583496	0.306641	0.427246	0.84668
142.1	-0.0742188	0.334961	0.294434	0.552246	0.237305	0.430664	0.821777
142.2	-0.0952148	0.29834	0.279785	0.521973	0.230469	0.402344	0.810059
142.3	-0.18457	0.168457	0.242188	0.497559	0.170898	0.274902	0.772461
142.4	-0.268066	0.0380859	0.23291	0.508789	0.0717773	0.172852	0.724121
142.5	-0.375977	-0.103516	0.191895	0.439453	-0.0371094	0.0927734	0.605957
142.6	-0.464844	-0.1875	0.0742188	0.28125	-0.127441	0.0219727	0.510742
142.7	-0.383301	-0.15625	0.0673828	0.27832	-0.0966797	0.0893555	0.549316
142.8	-0.113281	0.0561523	0.263184	0.463867	0.124023	0.32666	0.770996
142.9	0.234375	0.397461	0.595215	0.789063	0.478027	0.671875	1.10059
[truncated: 702 more rows]

## Sheet: Figure 4D -D21 Fc4-1 isotherm
[D21] (µM)	Response Units (RU)
0.15625	14.8947
0.3125	23.455
0.625	32.7718
1.25	42.1473
2.5	49.6177
5	55.6436
10	60.475
