# Supplementary material for: Development of D-box peptides to inhibit the anaphase-promoting complex/cyclosome
Source: eLife. 2025 Sep 1;14:RP104238. doi: 10.7554/eLife.104238 (PMC12401543; doi:10.7554/eLife.104238)
Supplement: Figure 6—source data 1. [file elife-104238-fig6-data1.xlsx]

## Sheet: Figure 6 - CETSA
Temperature (°C)	1% DMSO				100 μM D21				100 μM D20				100 μM D7				100 μM D19
40	108.078	106.667	92.9021	92.3536	106.728	104.332	101.625	87.3144	112.597	113.267	78.1427	95.9937	107.901	105.149	97.4526	89.4975	103.924	103.089	103.816	89.1698
42	110.304	98.7062	100.964	97.2749	108.769	101.514	94.3315	93.3934	90.7355	98.0428	97.3299	90.2202	102.873	90.5501	97.0202	87.6717	101.087	100.585	95.5224	86.3866
44	100.314	98.4851	90.3703	87.4682	93.1545	103.176	90.5949	87.0553	90.1868	94.5799	91.7692	89.4875	93.6715	91.5585	87.1967	85.6786	91.8654	99.23	91.6039	91.1333
46	94.978	88.255	83.9216	82.9874	90.7976	90.5356	86.3531	82.508	86.8896	92.3134	88.4811	83.2139	93.7015	84.7506	82.7165	79.8712	90.5547	84.0149	85.7793	82.7836
48	79.3671	74.0241	76.5971	72.8945	81.5323	87.5808	77.0979	79.0045	86.2769	90.8526	78.3631	83.9314	80.6776	78.1417	74.5152	75.5647	82.7971	82.905	79.2413	82.0076
50	63.3981	66.1561	61.4113	60.1617	74.6629	73.7913	70.3805	66.1344	77.1014	75.7971	74.1493	71.8554	72.0282	70.5227	68.2945	59.8849	77.2272	70.5728	71.7333	64.3383
52	52.6726	51.1847	49.8511	51.3527	65.8101	63.9787	59.294	62.3978	69.0827	67.1855	64.504	65.3766	60.2668	56.2348	58.9538	50.5332	59.3015	58.787	59.2559	56.5351
54	39.8216	35.2928	39.8318	39.4324	55.2693	51.2809	52.1509	51.443	56.8273	55.0716	54.8283	54.0348	45.1662	40.3136	43.8358	45.5465	48.2242	48.4351	46.7736	46.3586
56	32.9667	31.7513	32.4318	31.5867	41.4277	37.9025	39.7122	39.5486	39.9538	37.7982	39.4233	38.3911	35.4468	35.5714	35.5004	35.3126	39.0142	38.0055	37.9161	31.572
58	29.7475	27.8687	28.7824	25.93	33.2206	32.6531	31.5529	31.2836	34.9206	34.4767	32.7711	32.6769	33.6967	30.9619	32.2259	29.4674	34.3502	33.8104	33.5085	31.9094
60	28.935	27.7059	27.8636	26.0672	29.1294	28.09	27.5094	24.2361	31.0671	31.4912	30.4149	28.8978	29.357	28.691	27.883	28.2255	32.8388	32.3243	29.7182	29.9797
	Note: The data shown are technical replicates from one experiment.

## Sheet: Table 3 - Tm data from all exp.
	Experiment number	1% DMSO (centrifuged)	1% DMSO	100 µM Apcin	100 µM D21	100 µM D20	100 µM D7	100 µM D19
20200128	1	50.58	50.59	55.18	54.37	52.72	51.31	49.64
20200219	2	48.63	49.69	54.13	52.78	52.11	51.56	50.53
20200220	3	49.19	49.8	53.77	52.58	52.93	50.84	51.15
	Average	49.4667	50.0267	54.36	53.2433	52.5867	51.2367	50.44
	SD	0.81977	0.40086	0.598164	0.800847	0.347787	0.298478	0.619731
		1% DMSO (centrifuged)	1% DMSO	100 µM Apcin	100 µM D21	100 µM D20	100 µM D7	100 µM D19
	Cdc20_HiBiT Melting Temperature (°C)	49.47 ± 0.82	50.03 ± 0.4	54.36 ± 0.6	53.24 ± 0.8	52.59 ± 0.35	51.24 ± 0.3	50.44 ± 0.62
