# Supplementary material for: Development of D-box peptides to inhibit the anaphase-promoting complex/cyclosome
Source: eLife. 2025 Sep 1;14:RP104238. doi: 10.7554/eLife.104238 (PMC12401543; doi:10.7554/eLife.104238)
Supplement: Figure 8—source data 1. [file elife-104238-fig8-data1.xlsx]

## Sheet: Peptide D0
Time (min)
-10		1.00745	1.01013	1.02733	1.06395	1.04401	1.01907		1.03972		1.01056				1.04103			0.994773
-8		1.00659	1.01849	1.02598	1.04768	1.03049	1.02062		1.02984	1.02383	1.00554			1.00095	1.03202			0.989729
-6	0.999254	1.01533	0.993912	1.01374	1.03778	1.02669	1.02067		1.02197	1.01272	1.00331			0.999366	1.02481			0.99078	0.954923	1.18875
-4	0.998552	1.02289	1.00299	1.022	1.04527	1.02463	1.00474		1.02977	1.01162	0.999362			1.00045	1.0151		0.988343	0.997163	0.991882	1.08114
-2	0.999294	0.993846	0.994521	1.00405	1.03228	1.01237	1.00338		1.00501	1.00456	0.995815			1.00188	1.01044		0.997604	0.987917	0.995322	1.04164
0	1	1	1	1	1	1	1	1	1	1	1	1	1	1	1	1	1	1	1	1
2	1.01	0.988879	0.987714	1.0187	1.01	0.998999	0.991	0.99043	0.992	0.990954	0.993084	0.989179	0.976	0.993882	0.993	0.998145	0.989342	0.995929	0.989098	1.00215
4	1.01	0.997733	0.984504	0.986108	1.01	0.988585	0.972	0.982466	0.98	0.988634	0.983518	0.964617	0.957	0.994739	0.977	0.996497	0.987701	0.997321	0.986044	0.999515
6	0.983	0.966422	0.981792	0.977848	1.02	0.981526	0.976	1.0179	0.978	0.98682	0.984534	0.973978	0.937	0.990022	0.954	0.992971	0.98308	0.956974	0.994317	1.01718
8	0.945	0.941697	0.973712	0.959751	0.996	0.978272	0.969	0.994886	0.973	0.983333	0.984056	0.966034	0.928	0.985662	0.942	0.98924	0.96565	0.936354	0.98732	0.95995
10	0.949	0.954977	0.977088	0.962529	0.974	0.978	0.963	1.01468	0.978	0.975124	0.978854	0.960581	0.899	0.985517	0.937	0.984255	0.951739	0.969215	0.972823	0.978381
12	0.954	0.971281	0.976479	0.965308	0.968	0.977	0.957	0.992475	0.966	0.974735	0.99725	0.942159	0.9	0.988732	0.935	0.981629	0.944259	0.980326	0.974794	0.983578
14	0.916	0.95962	0.968952	0.954644	0.933	0.956	0.952	0.997516	0.951	0.972627	0.981704	0.940871	0.95	0.990245	0.934	0.980953	0.948541	0.963515	0.979433	1.02293
16	0.922	0.951198	0.97017	0.936172	0.906	0.962	0.952	1.00416	0.939	0.976125	0.965541	0.93619	0.941	0.984	0.924	0.975587	0.953446	0.958314	0.987861	0.982192
18	0.939	0.970633	0.967292	0.949088	0.921	0.975	0.946	1.00884	0.941	0.969199	0.957708	0.93619	0.911	0.982	0.916	0.968887	0.945778	0.938639	0.974562	0.985588
20	0.949	0.996221	0.966241	0.910866	0.924	0.963	0.939	1.0057	0.932	0.962756	0.930005	0.929191	0.916	0.981	0.906	0.963695	0.950352	0.944024	0.985	0.979975
22	0.966	0.966854	0.956832	0.923556	0.914	0.96	0.946	1.01227	0.924	0.955347	0.912965	0.943576	0.922	0.977	0.901	0.960737	0.942128	0.915944	0.96915	0.996535
24	0.973	0.929497	0.962311	0.904108	0.918	0.95	0.931	0.988822	0.907	0.951237	0.895366	0.938251	0.897	0.969	0.891	0.957603	0.946419	0.921697	0.980516	1.00443
26	0.97	0.949255	0.948088	0.903657	0.895	0.955	0.922	0.995763	0.887	0.949823	0.894091	0.926872	0.888	0.971	0.883	0.953566	0.946589	0.919753	0.972049	0.992032
28	0.959	0.985856	0.9565	0.906135	0.94	0.945	0.915	0.99737	0.877	0.940448	0.892895	0.93984	0.879	0.965	0.88	0.948798	0.947004	0.922143	0.959678	0.987251
30	0.967	0.928525	0.94355	0.888639	0.891	0.949	0.912	1.00044	0.875	0.941661	0.903478	0.940098	0.876	0.957	0.872	0.946727	0.934752	0.905674	0.957011	0.980876
32	0.961	0.919564	0.936687	0.875122	0.873	0.949	0.912	1.00657	0.869	0.943781	0.91434	0.936834	0.874	0.945	0.86	0.942135	0.935347	0.916443	0.953763	0.969512
34	0.971	0.922155	0.927334	0.887062	0.881	0.945	0.912	1.01103	0.861	0.939187	0.92564	0.93984	0.863	0.936	0.846	0.936595	0.936007	0.934699	0.954769	0.969512
36	0.965	0.909307	0.930267	0.880153	0.842	0.925	0.906	1.00577	0.858	0.932733	0.924245	0.92451	0.851	0.925	0.842	0.931364	0.938808	0.926189	0.953841	0.975887
38	0.957	0.87249	0.91217	0.84471	0.831	0.937	0.892	1.00058	0.848	0.928681	0.9142	0.921805	0.838	0.921	0.833	0.927803	0.926113	0.903467	0.951792	0.972145
40	0.962	0.880155	0.918535	0.845611	0.83	0.928	0.884	1.00431	0.843	0.924594	0.896961	0.929535	0.836	0.928	0.828	0.924464	0.92683	0.908931	0.951328	0.953298
42	0.958	0.881667	0.892357	0.866712	0.796	0.93	0.872	0.982613	0.833	0.923463	0.895406	0.919744	0.821	0.93	0.823	0.921703	0.924896	0.904807	0.96281	0.982054
44	0.958	0.87778	0.886933	0.848765	0.816	0.927	0.864	1.00913	0.829	0.921979	0.900409	0.922235	0.823	0.923	0.821	0.913411	0.918445	0.894169	0.945065	0.960089
46	0.96	0.852084	0.879849	0.854772	0.774	0.916	0.854	1.00073	0.826	0.919976	0.916492	0.923952	0.815	0.923	0.808	0.913793	0.910362	0.891253	0.945336	0.956278
48	0.956	0.838696	0.878466	0.815574	0.801	0.911	0.841	1.00183	0.82	0.912933	0.919721	0.901967	0.819	0.924	0.797	0.914535	0.912428	0.893775	0.949163	0.961682
50	0.958	0.849277	0.865017	0.836149	0.78	0.904	0.837	0.989188	0.814	0.915041	0.91713	0.919615	0.817	0.923	0.788	0.911585	0.907344	0.903362	0.934588	0.961682
52	0.948	0.825848	0.875256	0.805587	0.783	0.909	0.838	0.985316	0.802	0.912556	0.923508	0.89106	0.806	0.922	0.782	0.907477	0.902487	0.912057	0.936637	0.937084
54	0.926	0.834809	0.870164	0.800931	0.779	0.921	0.839	0.978448	0.799	0.901296	0.929148	0.885091	0.807	0.919	0.776	0.902979	0.896649	0.911531	0.93397	0.966879
56	0.917	0.845714	0.865626	0.793347	0.768	0.902	0.82	0.955435	0.793	0.900106	0.943597	0.880196	0.794	0.916	0.767	0.895685	0.891141	0.904203	0.932733	0.934521
58	0.947	0.822932	0.852621	0.787565	0.785	0.909	0.818	0.971873	0.789	0.898009	0.952287	0.886852	0.785	0.914	0.759	0.889493	0.88584	0.908747	0.928055	0.963692
60	0.953	0.795185	0.837235	0.774799	0.774	0.9	0.802	0.951198	0.785	0.892945	0.950433	0.860615	0.793	0.915	0.753	0.885224	0.884595	0.911006	0.926547	0.946924
62	0.962	0.835781	0.830538	0.77142	0.753	0.898	0.803	0.945792	0.78	0.885159	0.949437	0.864222	0.803	0.913	0.75	0.879282	0.879493	0.918702	0.942282	0.94332
64	0.96	0.821097	0.828103	0.773072	0.751	0.891	0.804	0.948203	0.772	0.880601	0.939033	0.86375	0.8	0.91	0.743	0.871756	0.871014	0.911689	0.93482	0.946369
66	0.957	0.788491	0.829266	0.76316	0.741	0.892	0.791	0.918834	0.767	0.878916	0.941026	0.857738	0.791	0.909	0.74	0.866035	0.867637	0.914867	0.927089	0.945399
68	0.95	0.802095	0.823787	0.776151	0.748	0.884	0.785	0.937537	0.762	0.878327	0.955575	0.846144	0.795	0.905	0.729	0.863364	0.865478	0.909929	0.926238	0.931195
70	0.96	0.790542	0.819138	0.731246	0.741	0.877	0.785	0.925994	0.759	0.875783	0.957947	0.846273	0.783	0.901	0.726	0.859495	0.861545	0.907591	0.937101	0.920108
72	0.956	0.806089	0.81709	0.733949	0.746	0.879	0.781	0.934249	0.758	0.86662	0.948899	0.852327	0.769	0.902	0.72	0.857582	0.854462	0.899527	0.940542	0.929462
74	0.949	0.793889	0.817477	0.732673	0.747	0.878	0.779	0.910213	0.752	0.865948	0.951908	0.842623	0.769	0.898	0.711	0.855669	0.842568	0.911873	0.930529	0.948933
76	0.954	0.784388	0.809508	0.758504	0.739	0.881	0.787	0.941847	0.747	0.862556	0.946746	0.829354	0.769	0.894	0.707	0.856372	0.840908	0.901524	0.937565	0.93258
78	0.952	0.78903	0.827495	0.735075	0.75	0.865	0.778	0.926578	0.743	0.859211	0.957608	0.823815	0.754	0.892	0.703	0.856214	0.840088	0.898424	0.933274	0.904864
80	0.95	0.793565	0.824229	0.713149	0.742	0.873	0.78	0.913282	0.746	0.858681	0.955715	0.82725	0.753	0.888	0.697	0.853714	0.839333	0.908931	0.928983	0.918237
82	0.952	0.783416	0.817588	0.693399	0.717	0.869	0.784	0.920587	0.747	0.857892	0.961355	0.825876	0.742	0.89	0.69	0.85229	0.835089	0.906094	0.940117	0.925928
84	0.944	0.775426	0.803863	0.69828	0.743	0.866	0.784	0.931108	0.744	0.850801	0.963049	0.824717	0.744	0.881	0.691	0.851022	0.829874	0.912556	0.943789	0.932442
86	0.933	0.777262	0.793957	0.693099	0.731	0.866	0.783	0.91277	0.743	0.851284	0.964365	0.817374	0.732	0.879	0.686	0.849127	0.828893	0.911873	0.937333	0.924958
88	0.923	0.78266	0.791355	0.675903	0.731	0.863	0.782	0.924971	0.742	0.848445	0.969606	0.829569	0.726	0.878	0.685	0.845253	0.827176	0.909929	0.949124	0.913941
90	0.918	0.766357	0.809674	0.664038	0.733	0.852	0.774	0.94265	0.739	0.844912	0.968809	0.813767	0.732	0.871	0.675	0.844109	0.825177	0.914578	0.945606	0.915258
92	0.896	0.75556	0.797056	0.680183	0.727	0.854	0.783	0.916715	0.738	0.834429	0.966039	0.824244	0.731	0.872	0.675	0.841893	0.818348	0.913712	0.953454	0.909437
94	0.901	0.770136	0.80331	0.681159	0.731		0.774	0.931327	0.737	0.833416	0.975825	0.80973	0.721	0.869	0.668	0.837448	0.822649		0.946805	0.913803
96	0.909	0.74336	0.791964	0.695051	0.707		0.781	0.920222	0.735	0.83225	0.976064	0.807798	0.715	0.864	0.665	0.835275	0.817528		0.959717	0.891353
98	0.915		0.789418	0.651648	0.737		0.774	0.928477	0.736	0.825713	0.975027	0.816	0.71	0.865	0.661	0.835288	0.812453		0.962462	0.890937
100	0.924		0.794455	0.634903	0.741		0.777	0.910506	0.734	0.828375	0.978117	0.815055	0.704	0.862	0.655	0.834027	0.810407		0.966366	0.907913
102	0.927		0.791798	0.656529			0.771	0.906634	0.731	0.822485		0.806682	0.723	0.857	0.65	0.830817	0.812784		0.974717	0.888512
104	0.924		0.78975				0.778	0.906999	0.726	0.820836		0.806896	0.689	0.855	0.649	0.827422	0.819103		0.977694	0.863706
106	0.931		0.78654				0.778	0.892607	0.723	0.816113		0.803805	0.699	0.852	0.643	0.826509	0.81202		0.979201	0.87209
108	0.928						0.766	0.904004		0.811249		0.795216	0.700275	0.854	0.641	0.824059	0.808992		0.979974	0.89551
110	0.921							0.888296		0.809176		0.802044	0.692503	0.852		0.822861	0.809539		0.966134	0.884839
112	0.914							0.890488				0.802302	0.686405			0.819051	0.807549		0.963738	0.87105
114								0.866452				0.782291	0.687178			0.817025	0.812953
116								0.911528				0.786714	0.671075			0.815146
118								0.875584				0.772544	0.678933			0.813406
120

## Sheet: Peptide D1
Time (min)
-10	1.08251	1.03644	1.05241					1.07016	1.03449		1.07862	1.03541	1.10189	1.0653	1.06268	1.04559	1.0463		1.0354	1.03402	1.07835	1.02517
-8	1.07507	1.0321	1.052			1.04413		1.06099	1.03298	1.02994	1.06668	1.02732	1.11231	1.05142	1.05351	1.02265	1.05291		1.04228	1.0304	1.0732	1.02877
-6	1.06527	1.03373	1.00754			1.00927		1.05344	1.01621	1.02032	1.04633	1.02161	1.06835	1.04317	1.04591	1.02562	1.02638		1.0372	1.03867	1.0767	1.01286
-4	1.05525	1.02809	1.03436	1.03789		1.04656		1.04299	1.02658	1.02566	1.07508	1.00876	1.05174	1.03058	1.03412	1.02889	1.04408		1.03697	1.02099	1.05719	1.05131
-2	1.03744	1.01634	1.01517	1.0381		1.01807		1.02849	1.00763	1.0098	1.04594	1.00668	1.04316	1.02029	1.01093	1.01879	1.01104		1.02602	1.03174	1.03399	1.03652
0	1	1	1	1	1	1	1	1	1	1	1	1	1	1	1	1	1	1	1	1	1	1	1
2	0.925	0.941133	0.948331	0.974232	0.905	0.952629	0.967	0.955264	0.955	0.963789	0.94435	0.995466	0.945	0.953083	0.942	0.961164	0.96516	0.972189	0.934427	0.949953	0.931312	0.980083	0.918552
4	0.815	0.836	0.922825	0.934519	0.804	0.886959	0.904	0.846961	0.87	0.903682	0.868618	0.982451	0.805	0.92643	0.848	0.885498	0.926901	0.91738	0.865342	0.87902	0.846124	0.926003	0.799987
6	0.705	0.753	0.888051	0.814572	0.757	0.788626	0.853	0.731665	0.761	0.806608	0.739205	0.980067	0.691	0.832884	0.741	0.766318	0.867295	0.863696	0.788678	0.825561	0.773579	0.900553	0.728927
8	0.631	0.667	0.861478	0.71635	0.735	0.761872	0.777	0.654509	0.663	0.722175	0.66321	0.96756	0.575	0.727975	0.678	0.666592	0.791748	0.812012	0.725508	0.76869	0.70485	0.847856	0.663888
10	0.577	0.618	0.845895	0.669159	0.709	0.67	0.783	0.588955	0.594	0.663804	0.574879	0.953803	0.501	0.618248	0.62	0.580753	0.708992	0.751953	0.675462	0.747182	0.646365	0.802075	0.564047
12	0.541	0.589	0.823259	0.630861	0.677	0.662	0.752	0.554231	0.545	0.635198	0.500197	0.938716	0.443	0.559864	0.6	0.530853	0.672211	0.703019	0.636691	0.697343	0.600984	0.774136	0.58469
14	0.515	0.558	0.805872	0.585186	0.668	0.636	0.717	0.537227	0.511	0.61601	0.448878	0.91808	0.427	0.530724	0.578	0.512215	0.6486	0.671271	0.59598	0.707993	0.572344	0.704426	0.565238
16	0.497	0.553	0.776839	0.531831	0.674	0.606	0.743	0.51911	0.483	0.594934	0.42079	0.879817	0.389	0.525	0.58	0.509319	0.651372	0.643585	0.586691	0.691655	0.566921	0.67953	0.567487
18	0.488	0.538	0.797015	0.509095	0.653	0.6	0.728	0.517084	0.47	0.585692	0.39769	0.814703	0.389	0.525	0.571	0.488602	0.634969	0.63971	0.577126	0.715128	0.560876	0.651867	0.571788
20	0.48	0.529	0.79029	0.501213	0.664	0.59	0.693	0.511681	0.463	0.578062	0.398084	0.704096	0.372	0.525	0.564	0.48474	0.624942	0.5999	0.578373	0.670148	0.556959	0.641355	0.561599
22	0.475	0.525	0.787255	0.465946	0.667	0.597	0.738	0.517282	0.47	0.56945	0.359233	0.606973	0.371	0.52	0.555	0.477835	0.622355	0.612274	0.577911	0.69817	0.562131	0.641217	0.571854
24	0.469	0.507	0.750923	0.431892	0.658	0.615	0.698	0.512316	0.461	0.568443	0.347027	0.536661	0.374	0.524	0.561	0.476944	0.62314	0.615899	0.576386	0.732396	0.556086	0.588658	0.563716
26	0.467	0.514	0.799557	0.418957	0.664	0.6	0.666	0.509138	0.463	0.567561	0.333115	0.449347	0.362	0.52	0.551	0.455038	0.620229	0.615524	0.576294	0.734464	0.556096	0.574689	0.582374
28	0.463	0.515	0.802346	0.398646	0.656	0.587	0.698	0.508423	0.46	0.557262	0.348733	0.40956	0.362	0.518	0.556	0.460904	0.609371	0.608774	0.571072	0.625892	0.550934	0.564039	0.561268
30	0.456	0.516	0.789879	0.431993	0.646	0.601	0.704	0.507429	0.456	0.558219	0.351096	0.374814	0.368	0.522	0.552	0.468701	0.61584	0.634648	0.569455	0.656809	0.54528	0.55242	0.587402
32	0.451	0.527	0.795046	0.41633	0.642	0.595	0.642	0.504688	0.462	0.551496	0.326421	0.355546	0.35	0.525	0.553	0.468479	0.59976	0.624961	0.56927	0.700445	0.547198	0.539004	0.594747
34	0.457	0.53	0.793898	0.410065	0.646	0.584	0.688	0.50441	0.457	0.55283	0.296364	0.339561	0.345	0.523	0.553	0.467439	0.620968	0.611712	0.572089	0.686692	0.556266	0.520885	0.575162
36	0.457	0.531	0.797507	0.363783	0.637	0.572	0.691	0.503854	0.465	0.541197	0.312508	0.332174	0.334	0.527	0.553	0.479468	0.617411	0.645772	0.558641	0.701375	0.557491	0.494191	0.573111
38	0.456	0.53	0.789469	0.279002	0.621	0.578	0.66	0.504728	0.459	0.543589	0.338233	0.319706	0.33	0.522	0.555	0.483181	0.611219	0.597088	0.565619	0.722676	0.560062	0.497649	0.572846
40	0.452	0.519	0.789469	0.370049	0.622	0.565	0.649	0.499881	0.469	0.538779	0.312902	0.320527	0.342	0.513	0.546	0.484518	0.592367	0.614837	0.559843	0.694654	0.55963	0.508022	0.572846
42	0.452	0.521	0.76101	0.440178	0.627	0.6	0.675	0.492531	0.472	0.54379	0.281271	0.312007	0.328	0.522	0.544	0.49224	0.604704	0.605712	0.563124	0.72433	0.558656	0.492808	0.564841
44	0.451	0.508	0.770278	0.48171	0.605	0.577	0.675	0.497497	0.481	0.534095	0.260664	0.31998	0.331	0.516	0.564	0.488156	0.607476	0.614649	0.568808	0.689691	0.558456	0.504011	0.57106
46	0.451	0.519	0.77282	0.484337	0.612	0.607	0.651	0.497139	0.487	0.531653	0.228639	0.305089	0.326	0.518	0.558	0.492983	0.610988	0.609587	0.556377	0.691655	0.555081	0.512725	0.55313
48	0.448	0.516	0.781104	0.474434	0.605	0.595	0.663	0.495709	0.49	0.528682	0.287177	0.307981	0.308	0.516	0.539	0.487636	0.608077	0.617024	0.564695	0.7082	0.549829	0.526833	0.558621
50	0.448	0.507	0.777413	0.459074	0.623	0.565	0.662	0.500159	0.483	0.518181	0.233364	0.308098	0.294	0.519	0.542	0.506646	0.595278	0.612462	0.559519	0.685865	0.542016	0.523375	0.581514
52	0.453	0.507	0.769868	0.452809	0.626	0.588	0.712	0.496504	0.485	0.520145	0.235595	0.296998	0.3	0.512	0.547	0.476053	0.60572	0.627586	0.560213	0.701789	0.543724	0.50982	0.572582
54	0.454	0.503	0.782908	0.44523	0.614	0.592	0.667	0.487803	0.489	0.519969	0.233495	0.294849	0.302	0.5	0.538	0.501596	0.599806	0.627461	0.565804	0.671182	0.544417	0.507746	0.576684
56	0.45	0.501	0.769048	0.425829	0.619	0.579	0.653	0.488081	0.485	0.512591	0.226801	0.295396	0.302	0.509	0.546	0.488973	0.604704	0.630148	0.557625	0.675628	0.539375	0.503596	0.577147
58	0.45	0.5	0.780776	0.441188	0.627	0.597	0.646	0.493365	0.492	0.508864	0.19727	0.291761	0.293	0.51	0.553	0.490384	0.600499	0.624336	0.555684	0.67356	0.52628	0.505671	0.570134
60	0.451	0.488	0.747068	0.441289	0.623	0.595	0.655	0.484188	0.497	0.499421	0.21722	0.291527	0.304	0.511	0.537	0.506646	0.605998	0.611024	0.556146	0.699824	0.527244	0.501245	0.587469
62	0.451	0.485	0.776429	0.435024	0.626	0.603	0.649	0.488518	0.492	0.502317	0.195301	0.284101	0.301	0.499	0.534	0.503601	0.584096	0.620461	0.551848	0.695792	0.530518	0.520194	0.577015
64	0.451	0.479	0.760272	0.44139	0.628	0.583	0.637	0.487326	0.498	0.506018	0.184801	0.290041	0.299	0.502	0.538	0.492909	0.597449	0.611774	0.539418	0.687209	0.534625	0.528216	0.560143
66	0.452	0.463	0.735258	0.430982	0.635	0.597	0.65	0.491418	0.499	0.500252	0.14372	0.272884	0.295	0.492	0.536	0.493948	0.598558	0.603837	0.541266	0.689898	0.534505	0.533195	0.555578
68	0.453	0.456	0.735668	0.431083	0.625	0.599	0.617	0.472904	0.5	0.488014	0.206064	0.289729	0.304	0.506	0.532	0.512289	0.594261	0.602025	0.541405	0.694861	0.529926	0.525864	0.576088
70	0.454	0.45	0.751169	0.421382	0.627	0.601	0.631	0.483353	0.497	0.497935	0.166689	0.284101	0.277	0.497	0.539	0.508799	0.60073	0.612399	0.553189	0.663013	0.53802	0.514385	0.566693
72	0.459	0.46	0.746576	0.439875	0.646	0.593	0.632	0.478427	0.495	0.497079	0.143851	0.289064	0.298	0.508	0.531	0.501374	0.609278	0.589838	0.538309	0.691345	0.535017	0.508575	0.57847
74	0.456	0.42	0.739851	0.402284	0.631	0.585	0.625	0.47354	0.496	0.495266	0.130726	0.287814	0.286	0.499	0.516	0.515779	0.608447	0.587526	0.541543	0.690828	0.540139	0.505947	0.579727
76	0.458	0.454		0.417745	0.638	0.596	0.569	0.471395	0.497	0.494737	0.148838	0.286446	0.294	0.502	0.535	0.514665	0.600453	0.589338	0.541682	0.694654	0.53807	0.505947	0.570795
78	0.458	0.453		0.403496	0.634	0.598	0.62	0.470838	0.488	0.492798	0.108938	0.294028	0.298	0.497	0.533	0.507537	0.611589	0.59365	0.539787	0.675835	0.543623	0.531812	0.573243
80	0.455	0.448		0.426132	0.629	0.579	0.649	0.458721	0.483	0.49655	0.107757	0.276245	0.297	0.502	0.518	0.512958	0.634184	0.596213	0.532856	0.657429	0.541534	0.492531	0.585417
82	0.456	0.446		0.444725	0.639	0.592	0.588	0.465952	0.477	0.484992	0.13217	0.274994	0.281	0.506	0.513	0.504567	0.596987	0.590338	0.541913	0.688036	0.540349	0.492808	0.579794
84	0.455	0.441		0.427648	0.638	0.601	0.59	0.46329	0.476	0.486855	0.103294	0.277066	0.293	0.499	0.513	0.512364	0.615747	0.595338	0.537107	0.681419	0.53798	0.52462	0.568347
86	0.451	0.43		0.409762	0.642	0.567	0.592	0.46766	0.47	0.489449	0.085838	0.267959	0.292	0.503	0.51	0.517339	0.611034	0.603087	0.539372	0.68297		0.505394	0.567884
88	0.452	0.424		0.425728	0.636	0.571	0.622	0.455185	0.471	0.496852	0.122195	0.276128	0.286	0.504	0.517		0.626975	0.601962	0.538078	0.680591		0.529876	0.579794
90	0.449	0.42		0.436742	0.639	0.61	0.596	0.45888	0.479	0.487208	0.101326	0.275111	0.28	0.499	0.507		0.621246	0.6004	0.538817	0.6687		0.524066	0.581646
92	0.448	0.419		0.410873	0.636	0.589	0.615	0.465713	0.47	0.481315	0.101588	0.264363	0.271	0.499	0.508		0.627299	0.602587	0.542144	0.648744		0.53361	0.587535
94	0.448	0.419		0.405517	0.64	0.553	0.599	0.451728	0.468	0.47847		0.269014	0.285	0.502	0.508		0.61718	0.615024	0.532163	0.680488		0.523098	0.585417
96	0.443	0.42		0.404709	0.637	0.583	0.621	0.452126	0.466	0.467138		0.27089	0.285	0.494	0.501		0.617688	0.623711	0.52939	0.656292		0.499723	0.592629
98	0.441			0.402688	0.632	0.582	0.583	0.453794	0.464	0.475549		0.269835	0.287	0.491				0.595838	0.538262	0.656189		0.534025	0.609104
100	0.441			0.423403	0.628	0.593	0.605	0.466508		0.473232		0.268663	0.226	0.492				0.608774		0.64347			0.581249
102	0.44			0.396928	0.632	0.599	0.593	0.454509		0.474315		0.274838	0.215					0.603837		0.663117			0.572913
104				0.40673	0.623	0.586	0.591	0.458006		0.466182		0.267177						0.615149		0.617309			0.620418
106				0.405315	0.63	0.6	0.583			0.460163								0.610649		0.636956			0.59779
108				0.388036	0.624995	0.6	0.531			0.472401								0.629711					0.613736
110				0.396019	0.625036	0.561	0.56			0.465728								0.670333					0.631468
112				0.406225	0.629054		0.543											0.617524					0.6359
114				0.387227	0.622427		0.577											0.613274					0.628953
116					0.618616		0.557											0.617024					0.635834
118					0.616586		0.54											0.606525					0.642782
120

## Sheet: Peptide D2
Time (min)
-10		1.11511	1.05255						1.05339	1.10196			1.10657		1.03855	1.09684				1.10308	1.04753	1.16169	1.15402	1.06089	1.04072	1.07762	1.10249	1.05348	1.06007	1.06314			1.11972	1.07965	0.970912		1.04887	1.06802		1.08803
-8		1.11679	1.05047	1.05866	1.04		1.06		1.0541	1.06628			1.09318		1.05226	1.0941				1.0927	1.03791	1.14907	1.15312	1.05406	1.04545	1.06873	1.09989	1.04787	1.05507	1.04757			1.1163	1.07164	0.980282		1.04087	1.05548	1.06314	1.08707
-6		1.06762	1.05459	1.04013	1.04		1.05		1.04751	1.04686			1.0856		1.03862	1.07071				1.06658	1.02558	1.14179	1.13197	1.044	1.05587	1.05713	1.09061	1.03785	1.05029	1.03764			1.10619	1.06927	0.988942		1.0344	1.04887	1.06251	1.08631
-4		1.08259	1.03144	1.03008	1.03		1.04		1.03407	1.05459	1.02766		1.06288		1.04114	1.05416				1.05013	1.02062	1.12387	1.11668	1.03541	1.04912	1.04577	1.08115	1.0314	1.03896	1.02657		1.02943	1.0914	1.058	1.00073	1.07854	1.03285	1.04246	1.0582	1.06814
-2		1.05472	1.02274	1.01767	1.02		1.03		1.0169	1.0345	1.0191		1.04228		1.01841	1.03393				1.02978	1.01279	1.08308	1.08581	1.02179	1.03394	1.03141	1.05481	1.01576	1.02696	1.01433		1.02005	1.06449	1.03523	1.00577	1.04936	1.0234	1.02408	1.04187	1.05083
0	1	1	1	1	1	1	1		1	1	1	1	1	1	1	1	1	1	1	1	1	1	1	1	1	1	1	1	1	1	1	1	1	1	1	1	1	1	1	1
2	0.884	0.990321	0.947082	0.960107	0.966	0.872113	0.938		0.954633	0.895461	0.940696	0.820049	0.916	0.988442	0.97	0.951212	0.856684	0.965653	0.902896	0.840722	0.963038	0.863138	0.873645	0.9617	0.909453	0.926468	0.865006	0.917457	0.932667	0.918114	0.808384	0.937856	0.866647	0.909809	0.982569	0.869276	0.954283	0.963862	0.918243	0.839418
4	0.773	0.873	0.844962	0.872703	0.917	0.753028	0.864	0.88	0.873988	0.781064	0.822405	0.679594	0.784	0.930452	0.878	0.836038	0.692443	0.905618	0.785685	0.643964	0.865517	0.703643	0.738145	0.889543	0.732153	0.77904	0.716657	0.791194	0.793743	0.792958	0.661024	0.818097	0.690935	0.774594	0.923482	0.707661	0.836434	0.867651	0.783199	0.673996
6	0.702	0.761	0.740531	0.759856	0.863	0.641411	0.765	0.792127	0.777606	0.684396	0.697953	0.582491	0.67	0.892561	0.757	0.674341	0.543455	0.720853	0.656447	0.489163	0.733889	0.55902	0.615411	0.7911	0.541735	0.607818	0.592469	0.649947	0.647127	0.671352	0.533575	0.69703	0.535865	0.631488	0.789652	0.579878	0.698943	0.732833	0.629954	0.519625
8	0.636	0.7	0.654087	0.608764	0.807	0.5679	0.657	0.72449	0.679869	0.563893	0.587013	0.500021	0.574	0.784367	0.66	0.518493	0.444192	0.531423	0.564222	0.392972	0.603314	0.442647	0.500911	0.686301	0.389975	0.480519	0.533296	0.47545	0.5188	0.587111	0.495929	0.588806	0.425762	0.509798	0.655845	0.502323	0.573868	0.606069	0.501153	0.418871
10	0.592	0.62	0.600127	0.520025	0.752	0.512	0.561	0.649743	0.614021	0.477157	0.499812	0.463167	0.518	0.674624	0.598	0.412487	0.35785	0.410837	0.494644	0.345521	0.495833	0.355509	0.402582	0.586762	0.275735	0.394726	0.479827	0.358442	0.423722	0.541026	0.448448	0.511975	0.352969	0.408249	0.55921	0.451283	0.472547	0.496469	0.398223	0.35165
12	0.581	0.614	0.563429	0.44071	0.714	0.481	0.489	0.605695	0.553217	0.410138	0.430551	0.416964	0.472	0.585852	0.559	0.336881	0.292053	0.304612	0.436936	0.304481	0.401745	0.296787	0.338642	0.499615	0.205824	0.34047	0.434984	0.28125	0.353908	0.507488	0.432729	0.443339	0.309493	0.323493	0.491285	0.424225	0.400057	0.408748	0.322984	0.304779
14	0.562	0.573	0.534569	0.401995	0.669	0.455	0.433	0.554939	0.506382	0.35018	0.389097	0.393485	0.434	0.516185	0.564	0.3147	0.257453	0.253461	0.40453	0.280026	0.332229	0.251148	0.294132	0.416158	0.164907	0.314921	0.400158	0.21831	0.304134	0.488814	0.42894	0.393326	0.284691	0.276568	0.453869	0.406747	0.371226	0.348069	0.272808	0.27315
16	0.549	0.577	0.519436	0.367284	0.627	0.456	0.396	0.522048	0.486051	0.322372	0.35751	0.385057	0.428	0.463	0.549	0.282034	0.238545	0.219409	0.383697	0.281518	0.280479	0.230713	0.261767	0.339728	0.137718	0.29879	0.397746	0.190694	0.270662	0.474906	0.422652	0.358354	0.270471	0.171889	0.423959	0.396624	0.320132	0.302062	0.240709	0.257412
18	0.533	0.568	0.504259	0.384718	0.591	0.461	0.37	0.494702	0.45932	0.269256	0.340067	0.376169	0.414	0.425	0.534	0.251159	0.22071	0.191132	0.365679	0.287352	0.244266	0.218823	0.240152	0.279655	0.123748	0.289057	0.396819	0.173298	0.253667	0.475385	0.441838	0.332537	0.259883	0.19383	0.413212	0.39736	0.291868	0.273567	0.225424	0.243579
20	0.531	0.582	0.501495	0.330847	0.56	0.453	0.354	0.475853	0.460148	0.274921	0.3241	0.353277	0.405	0.39	0.566	0.252318	0.216172	0.17951	0.352199	0.310654	0.216163	0.210234	0.2248	0.23501	0.113316	0.28397	0.392506	0.169941	0.240764	0.461771	0.436195	0.317491	0.253889	0.206984	0.403353	0.398405	0.283566	0.25256	0.213717	0.226926
22	0.509	0.566	0.495877	0.352678	0.539	0.444	0.346	0.462706	0.433643	0.237549	0.314459	0.368915	0.396	0.37	0.575	0.244784	0.226004	0.167	0.342373	0.299088	0.200955	0.20679	0.210954	0.200915	0.109521	0.279324	0.397607	0.16987	0.228403	0.463169	0.409754	0.308245	0.249314	0.211756	0.399511	0.398463	0.277264	0.245451	0.204974	0.234128
24	0.501	0.557	0.488764	0.344589	0.525	0.45	0.343	0.456065	0.43097	0.248731	0.312712	0.339315	0.394	0.367	0.597	0.255321	0.239617	0.157895	0.328711	0.321541	0.188297	0.201634	0.204282	0.177675	0.09781	0.278898	0.398488	0.168954	0.225734	0.460556	0.410157	0.30252	0.244746	0.203094	0.399289	0.399373	0.27	0.238599	0.20097	0.22182
26	0.5	0.564	0.482331	0.321266	0.512	0.456	0.333	0.448888	0.42536	0.239535	0.317396	0.345143	0.382	0.359	0.561	0.224552	0.238987	0.152417	0.328121	0.31062	0.179226	0.19915	0.202142	0.161427	0.096701	0.27844	0.392413	0.181659	0.217912	0.451505	0.440064	0.301433	0.238566	0.195694	0.394826	0.397979	0.263623	0.23667	0.199066	0.221401
28	0.498	0.568	0.480428	0.322915	0.5	0.458	0.333	0.437149	0.407816	0.238799	0.308012	0.340824	0.379	0.333	0.551	0.231033	0.236529	0.175513	0.325557	0.303734	0.171207	0.198035	0.19889	0.149697	0.105257	0.277918	0.392228	0.182844	0.216454	0.447458	0.434583	0.299573	0.234178	0.196243	0.396203	0.399818	0.260509	0.23362	0.191997	0.217285
30	0.496	0.568	0.487631	0.334616	0.49	0.456	0.33	0.431403	0.400776	0.247333	0.307214	0.340279	0.377	0.35	0.56	0.215016	0.235205	0.155082	0.326737	0.296747	0.16809	0.193751	0.19653	0.141251	0.096204	0.276781	0.38657	0.182652	0.213043	0.441736	0.41322	0.298304	0.233623	0.191948	0.390985	0.403573	0.256132	0.227785	0.186975	0.219495
32	0.487	0.578	0.477573	0.325035	0.479	0.472	0.326	0.427445	0.399797	0.218936	0.300541	0.335919	0.364	0.331	0.536	0.223604	0.23968	0.149456	0.321586	0.30699	0.167067	0.19798	0.196168	0.135931	0.097185	0.279672	0.3945	0.187266	0.209985	0.443042	0.396453	0.29547	0.231442	0.188784	0.391185	0.401483	0.251245	0.224832	0.186246	0.225631
34	0.488	0.561	0.485729	0.322915	0.472	0.478	0.325	0.421408	0.393886	0.242257	0.30625	0.338434	0.36	0.328	0.533	0.209431	0.23426	0.169072	0.315912	0.315233	0.163433	0.199271	0.192062	0.131547	0.102344	0.281473	0.389121	0.190807	0.207574	0.446979	0.393309	0.290303	0.229101	0.188987	0.389075	0.404405	0.243755	0.222725	0.185047	0.218657
36	0.488	0.534	0.47404	0.319538	0.464	0.479	0.325	0.414298	0.404239	0.236151	0.3039	0.317806	0.362	0.318	0.522	0.222655	0.224176	0.178474	0.317138	0.353797	0.160851	0.2017	0.190002	0.127057	0.104177	0.275564	0.384298	0.196244	0.212279	0.44663	0.420717	0.287003	0.227636	0.184928	0.389164	0.402063	0.240585	0.221063	0.185738	0.213055
38	0.483	0.559	0.477483	0.33705	0.458	0.491	0.32	0.409066	0.397764	0.224748	0.302318	0.32464	0.359	0.319	0.536	0.216649	0.242579	0.149234	0.334657	0.361056	0.159561	0.195816	0.194233	0.124345	0.101931	0.279214	0.394825	0.201837	0.207692	0.440393	0.420234	0.287287	0.230218	0.184119	0.390896	0.409612	0.237038	0.217294	0.186644	0.221439
40	0.47	0.516	0.4889	0.326606	0.454	0.483	0.32	0.413381	0.385904	0.211432	0.303749	0.329378	0.365	0.324	0.522	0.213593	0.250268	0.150492	0.32086	0.352067	0.160395	0.194988	0.193362	0.122971	0.102614	0.277112	0.392738	0.20178	0.208456	0.434395	0.400403	0.287122	0.227663	0.178144	0.395448	0.415244	0.238396	0.217278	0.183441	0.214961
42	0.47	0.549	0.484324	0.330689	0.452	0.479	0.315	0.405824	0.384812	0.22438	0.305436	0.320825	0.359	0.328	0.56	0.215437	0.244533	0.156118	0.315958	0.357325	0.160285	0.200011	0.191287	0.122619	0.108412	0.278392	0.412261	0.206947	0.204775	0.43136	0.399274	0.289706	0.226178	0.166964	0.394538	0.422076	0.234849	0.216649	0.184179	0.212027
44	0.473	0.556	0.479069	0.330532	0.447	0.478	0.314	0.397215	0.380144	0.23056	0.300842	0.325102	0.368	0.313	0.536	0.208746	0.25739	0.152935	0.311465	0.364583	0.163086	0.185416	0.189673	0.121926	0.102742	0.273589	0.420191	0.208203	0.213278	0.436824	0.386135	0.288101	0.229329	0.167094	0.404907	0.431638	0.234943	0.211936	0.180069	0.215913
46	0.469	0.54	0.485094	0.341134	0.445	0.481	0.314	0.397908	0.379541	0.205988	0.301836	0.310763	0.366	0.314	0.539	0.211538	0.260478	0.162854	0.318613	0.393142	0.162988	0.194138	0.186329	0.122274	0.106067	0.274948	0.432387	0.207827	0.212655	0.432979	0.381378	0.288158	0.224533	0.164465	0.399911	0.423412	0.231434	0.213324	0.179983	0.199489
48	0.46	0.514	0.488809	0.340113	0.443	0.466	0.31	0.399026	0.373442	0.222615	0.293461	0.318268	0.351	0.316	0.55	0.209642	0.26823	0.147679	0.316616	0.375199	0.161405	0.194557	0.189577	0.122814	0.100524	0.272025	0.443981	0.209928	0.210609	0.43951	0.396614	0.288414	0.226834	0.162375	0.404175	0.435141	0.224717	0.213703	0.180971	0.204405
50	0.452	0.518	0.494609	0.30878	0.44	0.484	0.311	0.396231	0.38308	0.21489	0.296293	0.335751	0.353	0.309	0.524	0.204847	0.256507	0.138722	0.320701	0.355018	0.161454	0.191819	0.191391	0.121312	0.101207	0.273636	0.442219	0.20865	0.211797	0.430311	0.389682	0.289461	0.225536	0.164094	0.39154	0.437406	0.221302	0.213751	0.179479	0.198384
52	0.451	0.552	0.510194	0.307916	0.438	0.486	0.311	0.397573	0.375136	0.202236	0.297829	0.322376	0.345	0.314	0.528	0.217229	0.255814	0.13628	0.314097	0.361666	0.162879	0.195429	0.187417	0.120673	0.105612	0.276939	0.436004	0.209594	0.21142	0.427993	0.409593	0.289256	0.220479	0.161812	0.394249	0.440812	0.226679	0.213186	0.176338	0.205586
54	0.452	0.55	0.49932	0.307759	0.436	0.47	0.311	0.397126	0.366138	0.21077	0.293295	0.317219	0.349	0.303	0.519	0.219178	0.250331	0.139981	0.318749	0.342163	0.159962	0.193553	0.188075	0.120443	0.104945	0.275532	0.445697	0.210396	0.214478	0.426264	0.388956	0.289933	0.222299	0.16692	0.397602	0.436477	0.215057	0.213178	0.174769	0.198537
56	0.45	0.504	0.500227	0.311371	0.434	0.483	0.312	0.398333	0.367569	0.20665	0.29432	0.314955	0.347	0.314	0.522	0.206691	0.252726	0.140055	0.311964	0.33694	0.160949	0.194016	0.188456	0.119203	0.109876	0.271219	0.43197	0.210808	0.216724	0.420653	0.401048	0.290468	0.220586	0.16458	0.398668	0.43367	0.216019	0.214744	0.180664	0.197241
58	0.446	0.515	0.500272	0.324014	0.431	0.494	0.309	0.394331	0.373292	0.187817	0.297664	0.312691	0.339	0.322	0.538	0.20353	0.266465	0.13169	0.312032	0.35936	0.162002	0.194458	0.191415	0.119845	0.107531	0.275627	0.43823	0.207444	0.2185	0.417452	0.389601	0.28842	0.220921	0.16224	0.391118	0.437909	0.215132	0.213437	0.1831	0.199909
60	0.445	0.503	0.507974	0.306188	0.43	0.474	0.31	0.398288	0.366515	0.199882	0.296233	0.3155	0.35	0.3	0.523	0.185985	0.258587	0.123029	0.323265	0.347081	0.160924	0.193531	0.192146	0.119079	0.105485	0.27885	0.449917	0.207678	0.219453	0.412705	0.393873	0.290872	0.218734	0.162048	0.393094	0.427012	0.208226	0.210531	0.18415	0.195793
62	0.442	0.518	0.498414	0.305167	0.427	0.479	0.309	0.398915	0.365498	0.21695	0.290418	0.301036	0.344	0.308	0.516	0.193572	0.260793	0.142646	0.317183	0.321168	0.160979	0.195275	0.191327	0.119002	0.113017		0.439761	0.206287	0.220606	0.417838	0.378557	0.288613	0.218359	0.162351	0.396358	0.422367	0.205208	0.214712	0.184894	0.19686
64	0.439	0.499	0.511825	0.310586	0.425	0.483	0.308	0.401106	0.365799	0.219451	0.283549	0.30896	0.343	0.302	0.506	0.194468	0.269931	0.12029	0.316548	0.329241	0.160078	0.194292	0.186429	0.118519	0.112818		0.430301	0.206926	0.220018	0.408032	0.38154	0.288215	0.213844	0.164556	0.397247	0.426122	0.19934	0.213921	0.185033	0.207263
66	0.445	0.526	0.512912	0.302576	0.422	0.483	0.308	0.403073	0.363879	0.202384	0.286622	0.300449	0.338	0.308	0.513	0.20058	0.274973	0.117773	0.305927	0.338195	0.157978	0.192945	0.186168	0.119347	0.105783		0.429976	0.205762	0.215701	0.405696	0.395083	0.292232	0.212112	0.166044	0.396114	0.414625	0.199585	0.211685	0.183426	0.198575
68	0.438	0.534	0.52954	0.301084	0.423	0.472	0.307	0.404348	0.360453	0.180976	0.289515	0.296843	0.336	0.3	0.543	0.197734	0.259595	0.136576	0.310239	0.327375	0.156468	0.190715	0.185048	0.117641	0.106494		0.429095	0.208331	0.218112	0.408584	0.37372	0.290394	0.214393	0.162577	0.399312	0.419793	0.199321	0.211242	0.184309	0.204519
70	0.438	0.521	0.522698	0.308151	0.421	0.471	0.307	0.402246	0.363315	0.207901	0.282209	0.300994	0.325	0.299	0.529	0.193941	0.281213	0.142572	0.317229	0.322389	0.157935	0.193807	0.184422	0.119232	0.112307		0.43401	0.204782	0.215831	0.402715	0.386618	0.288551	0.211269	0.164354	0.39547	0.407889	0.187377	0.209854	0.183872	0.209359
72	0.431	0.541	0.534841	0.319695	0.417	0.469	0.304	0.412777	0.358458	0.191348	0.278759	0.30221	0.334	0.3	0.511	0.18156	0.273209	0.127174	0.305837	0.32863	0.158848	0.19522	0.185674	0.119705	0.110033		0.422695	0.20743	0.216701	0.405365	0.381137	0.284653	0.210988	0.161128	0.404419	0.408857	0.190113	0.209337	0.183441	0.204977
74	0.429	0.511	0.530718	0.306345	0.414	0.457	0.306	0.411861	0.363804	0.192673	0.279588	0.29634	0.328	0.303	0.506	0.188936	0.253167	0.12029	0.311374	0.314995	0.159299	0.196026	0.18449	0.120235	0.109862		0.427796	0.209963	0.22157	0.406284	0.380008	0.284436	0.210587	0.161282	0.391851	0.394031	0.180755	0.207763	0.182443	0.203757
76	0.427	0.532	0.547073	0.322287	0.413	0.433	0.308	0.413135	0.366967	0.19076	0.279211	0.303174	0.324	0.305	0.51	0.191517	0.264826	0.149012	0.310693	0.318523	0.157497	0.197549	0.182178	0.120223	0.10692		0.421072	0.212199	0.214972	0.403304	0.389037	0.279657	0.208814	0.159794	0.397668	0.390741	0.188755	0.210071	0.182947	0.2033
78	0.424	0.521	0.526142	0.309408	0.411	0.42	0.307	0.41403	0.365385	0.210623	0.276801	0.302964	0.332	0.299	0.489	0.179189	0.262431	0.128063	0.312758	0.310552	0.158252	0.197682		0.120338	0.113941		0.419449	0.211795	0.217183	0.404187	0.389682	0.281847	0.213356	0.158051	0.397069	0.381702	0.185094	0.208167	0.184074	0.201623
80	0.434	0.579	0.5444	0.293937	0.411	0.419	0.306	0.418613	0.367757	0.198117	0.272192	0.310218	0.322	0.291	0.487	0.17687	0.272389	0.133245	0.316866	0.324763	0.157545	0.199569		0.120408	0.114154		0.414162	0.211596	0.219183	0.401262	0.395163	0.285648	0.214433	0.156034	0.401021	0.382224	0.188094	0.208312	0.184534	0.203033
82	0.424	0.544	0.544128	0.304146	0.41	0.4	0.307	0.421408	0.367833	0.198779	0.272749	0.293698	0.324	0.3	0.463	0.169758	0.264448	0.12029	0.31623	0.31313	0.161125	0.197803		0.119766	0.111127		0.428724	0.210631	0.216101	0.402458	0.376864	0.282928	0.218928	0.154979	0.394671	0.371153		0.209749	0.184956	0.214122
84	0.416	0.588	0.543947	0.298806	0.409	0.396	0.307	0.422012		0.20231	0.268366	0.295879	0.32	0.286	0.487	0.175448	0.267473	0.087941	0.322789	0.304752	0.159061	0.19915		0.120136	0.114197		0.419403	0.210723	0.221006	0.401943	0.393148	0.282342	0.21854	0.153713	0.402576	0.364747		0.212839	0.185388	0.201814
86	0.423	0.594	0.542225	0.324172	0.407	0.4	0.309	0.418546		0.200544	0.271695	0.302419	0.319	0.294	0.471	0.182244	0.297599	0.131172	0.323356	0.329105	0.157083	0.198057		0.119427	0.116002		0.412725		0.216936	0.403359	0.388634	0.280339	0.217516	0.152095	0.39456	0.352088		0.212678	0.184352	0.214656
88	0.414	0.576	0.556995	0.307602	0.406	0.398	0.308	0.427423		0.207092	0.271529	0.297723	0.305	0.304	0.474	0.178135	0.285435	0.128803	0.311011	0.320015	0.158818	0.199051		0.119884	0.119015		0.426915		0.215148	0.397362	0.365901	0.276743	0.219195	0.153367	0.397158	0.348546		0.209805	0.186337	0.216447
90	0.419	0.56	0.544717	0.299199	0.405	0.402	0.305	0.425142		0.201207	0.268125	0.297011	0.31	0.293	0.47	0.189621	0.28846	0.133541	0.310648	0.314249		0.200453		0.118849	0.113728		0.422602		0.214937	0.396994	0.385732	0.271554	0.218867	0.155552	0.397668	0.348856		0.209369	0.186121	0.21477
92	0.412	0.55	0.554413	0.298492	0.403	0.405	0.309	0.425187		0.199147	0.268938	0.287912	0.316	0.298	0.451	0.175606	0.255373	0.138722	0.313257	0.31123		0.203478		0.1199	0.11306		0.41982		0.213384	0.389801	0.389682	0.26786	0.219496	0.148821	0.390052	0.351198		0.209055	0.183129
94	0.417	0.556	0.562794	0.28365	0.402	0.395	0.307	0.43232		0.207165	0.261648	0.282546	0.318	0.302	0.461	0.175079	0.248692	0.119772	0.321064	0.317878		0.203577		0.119408	0.121928				0.215925	0.390224	0.388472	0.269312	0.217764	0.147213	0.391806	0.352592		0.206763	0.183992
96	0.408	0.599	0.561435	0.28632	0.401	0.401	0.31	0.436098		0.193997	0.262476	0.290302		0.315	0.461	0.183456	0.241823	0.112666	0.311669	0.298918		0.204405		0.119551	0.11893				0.21436	0.379277	0.384684	0.266244	0.218112		0.393183	0.348237		0.204326	0.184918
98	0.407	0.596	0.568775	0.28577	0.399	0.406	0.31	0.434533		0.199294	0.261587	0.284558		0.29	0.438		0.246928	0.125768	0.319793	0.268867		0.207066		0.11873	0.11684				0.215842	0.384999	0.399274	0.267622	0.22278		0.390407	0.345701		0.203502	0.188975
100	0.395	0.585	0.56873	0.290561	0.398	0.404	0.312	0.440168		0.202016	0.262205	0.288374		0.296			0.250205	0.121549	0.301638	0.272021		0.206613		0.119082	0.116599				0.218889	0.381835	0.400081	0.266796	0.221958		0.38852	0.34065		0.204931	0.186582
102	0.404	0.579	0.577021	0.27831	0.398	0.407	0.312	0.442694		0.197896	0.258409	0.282588		0.303			0.251528	0.126582	0.312872	0.280874		0.2069		0.11881	0.118162					0.381099	0.38952	0.264708				0.339895			0.185081
104	0.399	0.566	0.571493	0.280744	0.395	0.402	0.312	0.443253		0.188038	0.258936	0.283594		0.294			0.25802	0.119328	0.311578			0.210024			0.119484					0.386011	0.375897	0.263991				0.337553			0.184841
106	0.407	0.582		0.290404	0.393	0.402	0.315	0.451526			0.256752	0.279192		0.296			0.24989	0.129173	0.308197						0.12136					0.381927	0.412495	0.267007				0.337979			0.18875
108	0.392	0.583		0.295508	0.392737	0.401	0.315	0.448262			0.252595	0.284223		0.295			0.261801	0.148049	0.308515						0.116826					0.382607	0.400726	0.266512				0.332675			0.188289
110	0.393			0.292838	0.391478	0.39	0.316	0.454187			0.254191	0.282462		0.291			0.247054	0.118069	0.304861												0.424829	0.266887				0.335366			0.19167
112	0.398					0.385		0.459151			0.254131	0.290554		0.279			0.25802	0.129765	0.299823												0.420314	0.264099				0.329133
114	0.394					0.386		0.460962			0.251254	0.289506		0.295			0.240751	0.121327	0.30561												0.410963	0.265994				0.321798
116	0.389647					0.382		0.463511				0.275712		0.286			0.246612	0.05537	0.295352												0.412576
118	0.387292					0.377		0.460805				0.29504		0.286			0.244785	0.137612	0.303272												0.412173
120								0.46161
								0.466664

## Sheet: Peptide D3
Time (min)
-10				1.013	1.07			1.064		1.158	1.172	1.075	1.079	1.109	1.134	1.128	1.08	1.044	1.07	1.073			1.001	1.05	1.071	1.013	1.079	1.084	1.131	1.082	0.999			1.255		1.072		1.066
-8				1.012	1.05			1.037		1.145	1.132	1.076	1.049	1.066	1.118	1.134	1.08	1.042	1.06	1.071			1.017	1.045	1.064	1.022	1.068	1.071	1.117	1.074	1.003			1.283	1.196	1.07	1.07	1.058
-6				1.024	1.05			1.06		1.13	1.12	1.072	1.047	1.052	1.08	1.13	1.07	1.032	1.05	1.051			1.015	1.056	1.057	1.029	1.058	1.052	1.101	1.061	1.01			1.2	1.186	1.068	1.048	1.057
-4				1.016	1.05		1.04	1.051		1.108	1.122	1.072	1.018	1.055	1.054	1.102	1.06	1.009	1.03	1.045	1.083		1.024	1.048	1.053	1.039	1.047	1.038	1.082	1.046	1.016			1.191	1.152	1.059	1.045	1.043
-2				1.004	1.02		1.02	1.056		1.071	1.054	1.041	1.011	1.043	1.036	1.084	1.04	1.023	1.02	1.021	1.02	1.07	1.017	1.028	1.033	1.022	1.036	1.021	1.054	1.028	1.014			1.192	1.091	1.046	1.032	1.022
0	1	1	1	1	1	1	1	1	1	1	1	1	1	1	1	1	1	1	1	1	1	1	1	1	1	1	1	1	1	1	1	1	1	1	1	1	1	1
2	0.856	0.959	0.852	0.985	0.945	0.878	0.947	0.95	0.981	0.864	0.781	0.912	0.876	0.914	0.96	0.884	0.874	0.968	0.969	0.918	0.968	0.867	0.929	0.91	0.92	0.907	0.909	0.948	0.886	0.942	0.945	0.876	0.912	0.901	0.794	0.919	0.942	0.934
4	0.691	0.893	0.657	0.918	0.867	0.737	0.851	0.793	0.857	0.695	0.661	0.8	0.737	0.787	0.9	0.696	0.688	0.848	0.893	0.759	0.904	0.635	0.847	0.719	0.779	0.741	0.767	0.824	0.739	0.819	0.769	0.701	0.824	0.812	0.608	0.844	0.799	0.787
6	0.58	0.8	0.496	0.816	0.778	0.627	0.707	0.664	0.701	0.541	0.547	0.701	0.632	0.66	0.803	0.538	0.508	0.683	0.771	0.582	0.778	0.424	0.749	0.503	0.642	0.599	0.632	0.635	0.594	0.63	0.587	0.529	0.764	0.73	0.48	0.775	0.641	0.615
8	0.477	0.65	0.375	0.707	0.682	0.558	0.549	0.561	0.572	0.424	0.447	0.629	0.546	0.562	0.722	0.382	0.368	0.555	0.644	0.45	0.64	0.293	0.651	0.326	0.513	0.5	0.529	0.463	0.482	0.454	0.444	0.394	0.722	0.603	0.368	0.718	0.514	0.474
10	0.4	0.517	0.299	0.615	0.586	0.515	0.456	0.491	0.492	0.305	0.409	0.569	0.529	0.495	0.637	0.286	0.265	0.45	0.528	0.355	0.499	0.203	0.562	0.227	0.424	0.429	0.448	0.355	0.396	0.33	0.354	0.285	0.675	0.645	0.27	0.666	0.405	0.369
12	0.385	0.405	0.229	0.602	0.516	0.528	0.392	0.471	0.432	0.256	0.397	0.528	0.486	0.447	0.616	0.227	0.21	0.38	0.425	0.297	0.446	0.151	0.495	0.18	0.354	0.403	0.389	0.286	0.332	0.25	0.295	0.212	0.645	0.49	0.236	0.63	0.335	0.292
14	0.348	0.327	0.213	0.57	0.456	0.492	0.345	0.444	0.409	0.259	0.364	0.498	0.506	0.443	0.595	0.196	0.176	0.335	0.353	0.266	0.39	0.12	0.444	0.161	0.302	0.397	0.352	0.246	0.284	0.208	0.258	0.163	0.626	0.479	0.196	0.613	0.285	0.241
16	0.325	0.272	0.192	0.555	0.447	0.497	0.33	0.416	0.385	0.247	0.376	0.482	0.477	0.421	0.565	0.153	0.15	0.303	0.295	0.242	0.351	0.11	0.393	0.139	0.268	0.376	0.332	0.224	0.256	0.185	0.237	0.136	0.626	0.533	0.188	0.602	0.25	0.213
18	0.287	0.24	0.178	0.532	0.414	0.51	0.323	0.433	0.359	0.241	0.335	0.465	0.595	0.408	0.55	0.143	0.139	0.276	0.261	0.228	0.324	0.096	0.39	0.138	0.249	0.355	0.317	0.209	0.235	0.168	0.22	0.116	0.59	0.502	0.165	0.585	0.231	0.195
20	0.288	0.215	0.167	0.525	0.403	0.506	0.312	0.416	0.349	0.218	0.349	0.457	0.471	0.396	0.539	0.138	0.131	0.27	0.239	0.214	0.293	0.087	0.387	0.133	0.235	0.34	0.307	0.208	0.216	0.16	0.21	0.103	0.585	0.514	0.14	0.58	0.209	0.18
22	0.257	0.207	0.157	0.485	0.375	0.475	0.313	0.393	0.332	0.204	0.369	0.46	0.502	0.381	0.532	0.102	0.126	0.262	0.22	0.212	0.308	0.082	0.348	0.132	0.229	0.328	0.299	0.2	0.204	0.156	0.196	0.095	0.572	0.647	0.133	0.568	0.206	0.178
24	0.26	0.194	0.152	0.491	0.357	0.49	0.311	0.4	0.338	0.19	0.323	0.451	0.499	0.396	0.53	0.129	0.126	0.267	0.211	0.205	0.304	0.073	0.325	0.134	0.223	0.336	0.289	0.194	0.197	0.151	0.197	0.092	0.573	0.555	0.117	0.555	0.21	0.166
26	0.275	0.185	0.148	0.496	0.413	0.486	0.308	0.403	0.325	0.163	0.324	0.444	0.471	0.355	0.52	0.123	0.125	0.252	0.203	0.214	0.302	0.06	0.326	0.137	0.222	0.314	0.284	0.195	0.19	0.143	0.195	0.09	0.567	0.577	0.109	0.564	0.206	0.166
28	0.27	0.181	0.149	0.473	0.405	0.482	0.311	0.41	0.304	0.177	0.331	0.44	0.484	0.36	0.532	0.119	0.117	0.249	0.195	0.211	0.309	0.03	0.324	0.146	0.219	0.304	0.282	0.191	0.186	0.143	0.192	0.087	0.559	0.557	0.097	0.569	0.207	0.161
30	0.281	0.177	0.133	0.473	0.407	0.481	0.304	0.39	0.278	0.196	0.323	0.441	0.474	0.361	0.527	0.106	0.11	0.249	0.192	0.207	0.318	0.022	0.308	0.144	0.217	0.306	0.282	0.187	0.183	0.141	0.194	0.088	0.561	0.565	0.073	0.571	0.205	0.162
32	0.297	0.179	0.132	0.467	0.398	0.505	0.306	0.398	0.275	0.216	0.335	0.431	0.471	0.37	0.512	0.128	0.114	0.249	0.188	0.21	0.332	0.032	0.302	0.149	0.215	0.297	0.28	0.185	0.18	0.139	0.187	0.086	0.566	0.572	0.085	0.574	0.209	0.162
34	0.265	0.177	0.127	0.467	0.392	0.486	0.298	0.394	0.272	0.222	0.348	0.435	0.48	0.369	0.515	0.119	0.12	0.236	0.186	0.204	0.332	0.043	0.314	0.138	0.215	0.307	0.279	0.191	0.178	0.139	0.186	0.087	0.558	0.555	0.084	0.574	0.205	0.165
36	0.258	0.179	0.131	0.484	0.387	0.482	0.304	0.389	0.26	0.225	0.333	0.42	0.485	0.367	0.511	0.129	0.122	0.241	0.183	0.198	0.336	0.053	0.309	0.131	0.212	0.301	0.275	0.188	0.177	0.135	0.188	0.083	0.56	0.542	0.08	0.577	0.203	0.16
38	0.264	0.174	0.128	0.479	0.38	0.454	0.303	0.387	0.254	0.22	0.29	0.41	0.46	0.368	0.52	0.111	0.115	0.236	0.181	0.206	0.346	0.051	0.289	0.132	0.214	0.305	0.272	0.187	0.174	0.135	0.19	0.085	0.553	0.484	0.087	0.578	0.208	0.158
40	0.247	0.175	0.121	0.483	0.389	0.44	0.312	0.385	0.27	0.227	0.334	0.397	0.503	0.362	0.508	0.107	0.114	0.243	0.178	0.21	0.327	0.055	0.284	0.145	0.214	0.311	0.272	0.185	0.172	0.133	0.192	0.085	0.547	0.493	0.08	0.576	0.208	0.163
42	0.222	0.174	0.111	0.476	0.352	0.43	0.314	0.393	0.279	0.223	0.384	0.4	0.506		0.504	0.122	0.115	0.239	0.177	0.198	0.33	0.061	0.29	0.154	0.216	0.303	0.27	0.185	0.172	0.133	0.194	0.083	0.544	0.479	0.093	0.56	0.204	0.16
44	0.228	0.172	0.135	0.476	0.371	0.442	0.315	0.402	0.269	0.226	0.369		0.481		0.508	0.122	0.104	0.235	0.174	0.199	0.337	0.069	0.281	0.149	0.217	0.299	0.27	0.181	0.17	0.132	0.193	0.086	0.547	0.473	0.101	0.574	0.209	0.159
46	0.266	0.171	0.11	0.495	0.348	0.38	0.319	0.388	0.262	0.232	0.36		0.49		0.502	0.119	0.115	0.239	0.173	0.208	0.335	0.068	0.288	0.154	0.219	0.313	0.267	0.184	0.171	0.131	0.195	0.084	0.539	0.528	0.097	0.572	0.214	0.16
48	0.258	0.169	0.123	0.502	0.365	0.399	0.31	0.356	0.273	0.237	0.363		0.498		0.496	0.128	0.115	0.228	0.171	0.199	0.351	0.06	0.282	0.151	0.219	0.295	0.265	0.187	0.17	0.132	0.195	0.087	0.543	0.529	0.111	0.573	0.21	0.164
50	0.224	0.174	0.122	0.494	0.376	0.4	0.305	0.365	0.264	0.24	0.349		0.524		0.495	0.133	0.114	0.238	0.17	0.198	0.327	0.059	0.276	0.155	0.221	0.302	0.265	0.185	0.17	0.131	0.187	0.087	0.536	0.54	0.098	0.57	0.208	0.164
52	0.284	0.172	0.112	0.491	0.377	0.388	0.312	0.358	0.263	0.24	0.364		0.515		0.488	0.14	0.119	0.231	0.173	0.201	0.332	0.047	0.274	0.153	0.223	0.304	0.267	0.186	0.167	0.131	0.193	0.089	0.532	0.469	0.11	0.577	0.207	0.168
54	0.28	0.176	0.143	0.495	0.366	0.377	0.318	0.36	0.276	0.24	0.359		0.513		0.49	0.127	0.121	0.226	0.169	0.2	0.345	0.059	0.287	0.159	0.222	0.302	0.262	0.185	0.167	0.13	0.187	0.09	0.533	0.51	0.105	0.574	0.211	0.169
56	0.253	0.174	0.124	0.497	0.366	0.383	0.314	0.336	0.265	0.24	0.397		0.501		0.49	0.123	0.112	0.227	0.169	0.203	0.359	0.068	0.286	0.156	0.224	0.301	0.263	0.174	0.166	0.129	0.188	0.087	0.535	0.528	0.115	0.572	0.209	0.17
58	0.248	0.175	0.135	0.495	0.378	0.395	0.321	0.33	0.271	0.237	0.37		0.517		0.497	0.137	0.125	0.234	0.172	0.213	0.387	0.078	0.278	0.165	0.225	0.304	0.262	0.172	0.167	0.125	0.188	0.089	0.528	0.543	0.114	0.568	0.209	0.17
60	0.231	0.177	0.137	0.515	0.361	0.348	0.309	0.332	0.26	0.238	0.378		0.523		0.484	0.138	0.119	0.236	0.172	0.206	0.371	0.078	0.266	0.166	0.227	0.289	0.26	0.177	0.166	0.126	0.185	0.09	0.513	0.566	0.118	0.57	0.21	0.168
62	0.218	0.178	0.136	0.511	0.381	0.397	0.302	0.318	0.269	0.241	0.39		0.494		0.483	0.135	0.116	0.228	0.169	0.202	0.346	0.074	0.277	0.164	0.225	0.291	0.259	0.174	0.165	0.128	0.182	0.09	0.521	0.503	0.103	0.567	0.205	0.173
64	0.226	0.177	0.141	0.493	0.356	0.348	0.3	0.315	0.292	0.247	0.359		0.515		0.48	0.139	0.121	0.23	0.173	0.206	0.344	0.082	0.273	0.163	0.225	0.299	0.258	0.173	0.165	0.126	0.182	0.091	0.522	0.409	0.124	0.558	0.208	0.174
66	0.253	0.179	0.139	0.494	0.389	0.353	0.293	0.327	0.28	0.245	0.338		0.531		0.473	0.138	0.117	0.233	0.169	0.203	0.355	0.077	0.29	0.161	0.226	0.283	0.259	0.174	0.164	0.123	0.182	0.092	0.522	0.478	0.108	0.554	0.202	0.173
68	0.247	0.18	0.139	0.496	0.38	0.36	0.296	0.314	0.283	0.251	0.356		0.507		0.471	0.13	0.115	0.227	0.171	0.203	0.4	0.074	0.276	0.174	0.225	0.28	0.258	0.169	0.165	0.125	0.181	0.092	0.523	0.466	0.119	0.558	0.204	0.176
70	0.278	0.182	0.149	0.503	0.376	0.362	0.294	0.316	0.296	0.252	0.355		0.517		0.474	0.147	0.113	0.233	0.169	0.2	0.3	0.077	0.283	0.158	0.222	0.278	0.256	0.157		0.124	0.176	0.094	0.504	0.415	0.114	0.557	0.204	0.176
72	0.23	0.18	0.145		0.375	0.364	0.295	0.308	0.291	0.25	0.346		0.489		0.472	0.144	0.113	0.22	0.169	0.203	0.367	0.083	0.28	0.16	0.236	0.27	0.255	0.172		0.123	0.179	0.092	0.512	0.34	0.117	0.555	0.203	0.179
74	0.258	0.183	0.154		0.388	0.363	0.295	0.296	0.296	0.253	0.358		0.508		0.468	0.128	0.112	0.227	0.167	0.206	0.359	0.088	0.28	0.152	0.25	0.265	0.255	0.169		0.122	0.176	0.096	0.507	0.341	0.11	0.552	0.201	0.179
76	0.24	0.18	0.163		0.394	0.371	0.29	0.31	0.31	0.252	0.333		0.51		0.453	0.14	0.106	0.226	0.166	0.199	0.366	0.084	0.281	0.145	0.22	0.265	0.255	0.173		0.121	0.176	0.095	0.491	0.393	0.109	0.556	0.206	0.175
78	0.224	0.179	0.165		0.401	0.365	0.282	0.296	0.302	0.256	0.364		0.482		0.46	0.134	0.11	0.224	0.166	0.201	0.379	0.11	0.288	0.152	0.219	0.27	0.258	0.17		0.121	0.18	0.096	0.508	0.396	0.13	0.552	0.208	0.177
80	0.251	0.179	0.164		0.385	0.352	0.287	0.307	0.319	0.248	0.35		0.499		0.465	0.129	0.114	0.219	0.167	0.203	0.385	0.113	0.287	0.16	0.221	0.278	0.257	0.176		0.12	0.171	0.096	0.495	0.441	0.107	0.554	0.199	0.174
82	0.24	0.178	0.169		0.393	0.355	0.293	0.286	0.331	0.252	0.351		0.489		0.456	0.135	0.105	0.214	0.166	0.196	0.375	0.114	0.274	0.153	0.22	0.273	0.257	0.171		0.121	0.172	0.099	0.496	0.442	0.113	0.552	0.207	0.176
84	0.239	0.184	0.173		0.389	0.318	0.289	0.288	0.351	0.252	0.35		0.493		0.458	0.135	0.108	0.212	0.17	0.201	0.374	0.122	0.278	0.148	0.219	0.274	0.255	0.17		0.12	0.163	0.098	0.498		0.114	0.551	0.211	0.177
86	0.26	0.185	0.168			0.321	0.278	0.294	0.361		0.322		0.469		0.458	0.119	0.11	0.225	0.169	0.196	0.38	0.134		0.155	0.22	0.275	0.255	0.176		0.119	0.158	0.098	0.486		0.113	0.552	0.212	0.172
88	0.256	0.181	0.169			0.334	0.28	0.269	0.367		0.32		0.48		0.454	0.13	0.115	0.215	0.171	0.196	0.375	0.15		0.156	0.219	0.271	0.257	0.174		0.12	0.155	0.102	0.495		0.113	0.552	0.203	0.175
90	0.24	0.179	0.149			0.346	0.276	0.27	0.379		0.333		0.482		0.445	0.115	0.106	0.212	0.171	0.198	0.384	0.165		0.15	0.218	0.266	0.257	0.175		0.121	0.15	0.102	0.487		0.127	0.552	0.21
92	0.235	0.18	0.173			0.323	0.288	0.266	0.39		0.331		0.459		0.451	0.157	0.11	0.216	0.172	0.194	0.367	0.16		0.157	0.219	0.272	0.255	0.171		0.12	0.15	0.102	0.486		0.107	0.547	0.205
94	0.24	0.178	0.173			0.352	0.295	0.275	0.405		0.31		0.459		0.458	0.121	0.113	0.226	0.172	0.2	0.395	0.167		0.15	0.219	0.263	0.257	0.172		0.119	0.147	0.105	0.469		0.145	0.543	0.211
96	0.228	0.186	0.157			0.343	0.289	0.266	0.424		0.306		0.477		0.454		0.108	0.216	0.172	0.204	0.392	0.172		0.157	0.219	0.258	0.256	0.172		0.12	0.145	0.105	0.478		0.119	0.541	0.203
98	0.251	0.184	0.153			0.335	0.294	0.263	0.415		0.321				0.442		0.102	0.21	0.17	0.199	0.387	0.18		0.157	0.216	0.258	0.255	0.17		0.121	0.142	0.106	0.481		0.122	0.542	0.212
100	0.245	0.182	0.148			0.336	0.287	0.262	0.402		0.35				0.443		0.11		0.173		0.396	0.169		0.159	0.217	0.253	0.258	0.174		0.12	0.142	0.107	0.471		0.136	0.541	0.212
102	0.232	0.177	0.124			0.337	0.293	0.258	0.41		0.309				0.45		0.105		0.17		0.411	0.157		0.161	0.217	0.254				0.118	0.143	0.107	0.492		0.12		0.218
104	0.24	0.181	0.136			0.319	0.286	0.251	0.408						0.44		0.108		0.17		0.408	0.164		0.155						0.118	0.143	0.105	0.492		0.133		0.218
106	0.242	0.182	0.131			0.316	0.292	0.267	0.407								0.109		0.168		0.409	0.169		0.153						0.118	0.142	0.109	0.479		0.134		0.212
108	0.237	0.184	0.124			0.318	0.287		0.397								0.109				0.402	0.177		0.153								0.111	0.483		0.141		0.215
110	0.233	0.185	0.113			0.322	0.287		0.399												0.412	0.176										0.111	0.48		0.128		0.215
112	0.24	0.18	0.121			0.319	0.283		0.405												0.405	0.174										0.112	0.473
114	0.264	0.183	0.11			0.318	0.289		0.394												0.413	0.186										0.111	0.475
116	0.245	0.18	0.113			0.325			0.392													0.183										0.115	0.472
118	0.266	0.181	0.113			0.313			0.379																							0.114	0.459
120

## Sheet: Peptide D19
Time (min)
-10	1.1135		1.08674	1.04865			1.04	1.05472	1.04166	1.05247	1.08215	1.07955	1.11292	1.08346	1.10586	1.08336		1.04868	1.06872	1.05062	1.09416	1.10197				1.08207	1.05928		1.06606	1.04484	1.05367	1.03365	1.06088	1.0766
-8	1.11213		1.08426	1.03266	1.04		1.03	1.04811	1.03921	1.04784	1.08955	1.0498	1.06956	1.06407	1.09529	1.07719		1.03873	1.05248	1.06421	1.09316	1.08212		1.0419		1.06917	1.05241		1.05254	1.0391	1.03855	1.03173	1.05388	1.0678
-6	1.09794		1.07653	1.03312	1.03		1.02	1.05822	1.02108	1.04303	1.0444	1.04716	1.04818	1.03086	1.08099	1.06282		1.02979	1.03964	1.0553	1.08434	1.04414		1.03478		1.05604	1.00034		1.04179	1.03113	1.0297	1.02961	1.04892	1.05261
-4	1.08364	1.11392	1.05992	1.01727	1.02		1	1.03157	1.02103	1.03622	1.0464	1.03947	1.01531	1.05456	1.06175	1.05582	1.17223	1.02232	1.03792	1.03697	1.08116	1.0237	0.995264	1.03069		1.04761	1.04038		1.03294	1.02135	1.02668	1.0411	1.03017	1.04494
-2	1.05673	1.07035	1.03604	1.01396	1.01		1.02	1.02433	1.02798	1.02491	0.998337	1.01911	1.00046	1.01822	1.03946	1.03173	0.970788	1.01027	1.02068	1.0435	1.04911	0.980325	1.00405	1.019		1.02099	1.00223		1.01575	1.011	1.01878	1.02033	1.00814	1.01186
0	1	1	1	1	1	1	1	1	1	1	1	1	1	1	1	1	1	1	1	1	1	1	1	1	1	1	1	1	1	1	1	1	1	1
2	0.906	0.88836	0.926018	0.983002	0.985	0.94582	0.963	0.973543	0.973977	0.961617	0.935894	0.941144	0.959	0.977077	0.926	0.945085	0.957918	0.9659	0.959363	0.969492	0.895718	0.942258	0.965616	0.966471	0.979293	0.963969	0.941237	0.964214	0.970633	0.945004	0.956708	0.964957	0.953117	0.930924
4	0.802	0.775	0.816996	0.944576	0.967	0.863905	0.896	0.94615	0.916941	0.895024	0.870708	0.840145	0.896	0.920357	0.837	0.873681	0.912798	0.925109	0.894128	0.887099	0.77715	0.891617	0.901357	0.9173	0.958194	0.901945	0.841753	0.866132	0.925431	0.855565	0.877852	0.925395	0.872634	0.834233
6	0.714	0.685	0.716066	0.880076	0.954	0.757225	0.804	0.848559	0.813831	0.816618	0.804107	0.718149	0.808	0.815341	0.76	0.774933	0.827477	0.865173	0.805576	0.807824	0.684021	0.812147	0.825303	0.839193	0.932217	0.830108	0.72543	0.76308	0.857055	0.746365	0.806301	0.834303	0.776012	0.748048
8	0.656	0.61	0.642231	0.797608	0.923	0.67744	0.73	0.800636	0.694145	0.73973	0.778582	0.63693	0.695	0.70768	0.692	0.687682	0.733044	0.802386	0.719262	0.762173	0.593167	0.693413	0.757036	0.762597	0.902095	0.748103	0.587973	0.665098	0.796311	0.681394	0.72987	0.765947	0.690888	0.67599
10	0.59	0.551	0.581928	0.726006	0.881	0.613	0.682	0.743729	0.603155	0.660656	0.741415	0.535079	0.627	0.69906	0.62	0.599259	0.723355	0.757579	0.661507	0.723278	0.524327	0.635757	0.698698	0.699896	0.858019	0.67939	0.589691	0.577455	0.742399	0.645507	0.671771	0.67298	0.617368	0.619054
12	0.576	0.513	0.541169	0.667001	0.82	0.574	0.641	0.740172	0.544203	0.595101	0.688118	0.509435	0.571	0.637147	0.593	0.535116	0.635719	0.717952	0.613191	0.680894	0.513757	0.544397	0.664587	0.645259	0.825363	0.61294	0.580756	0.518274	0.710781	0.58599	0.623572	0.622651	0.555667	0.606205
14	0.544	0.484	0.516421	0.661537	0.745	0.553	0.616	0.699426	0.515997	0.538177	0.646961	0.46805	0.549	0.641654	0.513	0.501721	0.666233	0.684318	0.592153	0.669091	0.496505	0.505988	0.642181	0.605757	0.7929	0.563726	0.552921	0.474568	0.686382	0.569817	0.590969	0.569629	0.519674	0.58157
16	0.53	0.465	0.499545	0.633673	0.681	0.534	0.626	0.69849	0.486766	0.4914	0.642055	0.441159	0.524	0.615	0.445	0.490299	0.664642	0.679953	0.571514	0.652464	0.484307	0.491018	0.630522	0.573243	0.764276	0.535988	0.566495	0.432552	0.661916	0.534955	0.563358	0.540595	0.49118	0.578518
18	0.511	0.454	0.492728	0.631943	0.641	0.526	0.599	0.688007	0.459406	0.459959	0.62235	0.396767	0.515	0.6	0.43	0.485572	0.644107	0.659849	0.550396	0.649495	0.480543	0.44414	0.61859	0.549466	0.736106	0.516217	0.57354	0.408728	0.642192	0.512724	0.541924	0.517233	0.465436	0.578802
20	0.512	0.445	0.483257	0.633522	0.599	0.518	0.569	0.695183	0.437751	0.4362	0.607217	0.347574	0.52	0.582	0.471	0.470935	0.58684	0.64824	0.525638	0.645413	0.459927	0.442087	0.601011	0.536716	0.709074	0.507095	0.503952	0.383976	0.633389	0.49506	0.524438	0.507138	0.457188	0.562615
22	0.513	0.445	0.471645	0.646755	0.571	0.512	0.533	0.674466	0.438686	0.420556	0.619855	0.338489	0.497	0.563	0.499	0.474755	0.583659	0.65112	0.511399	0.62359	0.458713	0.465612	0.583614	0.528818	0.684412	0.496935	0.509794	0.375427	0.632536	0.497763	0.515244	0.485603	0.444619	0.559066
24	0.5	0.44	0.470985	0.612457	0.553	0.505	0.533	0.666292	0.447197	0.408458	0.603974	0.374373	0.494	0.578	0.533	0.456034	0.591902	0.650044	0.50476	0.636283	0.468991	0.455518	0.57487	0.523765	0.659153	0.492672	0.49055	0.369164	0.622508	0.478374	0.516005	0.46873	0.450154	0.546713
26	0.5	0.442	0.465267	0.630395	0.534	0.503	0.505	0.651067	0.422912	0.402427	0.590172	0.384188	0.498	0.581	0.541	0.45785	0.563268	0.637416	0.518039	0.631829	0.477409	0.456116	0.588897	0.521746	0.634693	0.484968	0.476632	0.360085	0.62023	0.49245	0.521646	0.471759	0.440691	0.530314
28	0.495	0.436	0.466587	0.624659	0.531	0.499	0.504	0.655622	0.433607	0.396129	0.578532	0.383185	0.485	0.576	0.562	0.450512	0.665799	0.637387	0.519878	0.647491	0.461309	0.446792	0.609117	0.512585	0.613672	0.477947	0.512371	0.364161	0.613891	0.493428	0.508531	0.459068	0.442977	0.526693
30	0.483	0.434	0.459784	0.624962	0.531	0.513	0.47	0.667415	0.430933	0.39421	0.591586	0.406521	0.478	0.569	0.553	0.441852	0.633984	0.634943	0.4984	0.631532	0.47555	0.443114	0.590536	0.512526	0.595227	0.481341	0.483505	0.359091	0.608564	0.488954	0.524664	0.462481	0.432657	0.536419
32	0.474	0.434	0.454417	0.617677	0.521	0.508	0.477	0.649819	0.44537	0.390535	0.595743	0.38908	0.485	0.597	0.551	0.435876	0.644975	0.625109	0.489001	0.631606	0.486366	0.410778	0.620321	0.508052	0.579862	0.477552	0.461168	0.356606	0.602038	0.490166	0.502975	0.450175	0.430551	0.512779
34	0.48	0.427	0.448612	0.621714	0.524	0.513	0.497	0.638587	0.434765	0.388483	0.581608	0.332867	0.457	0.602	0.55	0.430808	0.68966	0.621559	0.4972	0.611936	0.478884	0.454234	0.611486	0.49928	0.565809	0.475723	0.481443	0.359555	0.597416	0.507644	0.498068	0.445801	0.439549	0.515192
36	0.466	0.429	0.448553	0.620986	0.52	0.499	0.484	0.634282	0.426121	0.389132	0.57055	0.320167	0.47	0.624	0.541	0.421958	0.705568	0.618184	0.490801	0.608373	0.473691	0.406672	0.603926	0.494144	0.553195	0.474289	0.491065	0.359919	0.588386	0.497856	0.499394	0.435081	0.439192	0.495811
38	0.479	0.427	0.451251	0.622261	0.518	0.503	0.492	0.663672	0.449737	0.387444	0.572129	0.342196	0.438	0.607	0.532	0.425438	0.624006	0.612802	0.49516	0.607037	0.471049	0.354662	0.62615	0.492633	0.543069	0.4707	0.4689	0.351635	0.583099	0.487136	0.497617	0.432341	0.440834	0.515618
40	0.476	0.429	0.441647	0.614399	0.513	0.503	0.492	0.612005	0.451921	0.390499	0.575538	0.346875	0.438	0.597	0.53	0.408986	0.641793	0.610183	0.5002	0.618023	0.478899	0.373738	0.619273	0.488584	0.53425	0.470049	0.472509	0.355214	0.578118	0.494827	0.489776	0.437004	0.432407	0.529178
42	0.466	0.431	0.439961	0.614764	0.513	0.504	0.512	0.612442	0.458337	0.389612	0.556415	0.347331	0.445	0.594	0.523	0.407587	0.672017	0.606983	0.50124	0.63079	0.479268	0.440547	0.624647	0.484641	0.528354	0.465508	0.45378	0.351105	0.576573	0.494221	0.482669	0.421718	0.435371	0.518671
44	0.46	0.427	0.441134	0.607479	0.51	0.496	0.508	0.617684	0.468764	0.390906	0.570882	0.345933	0.436	0.601	0.523	0.393366	0.671439	0.607768	0.519838	0.60481	0.490191	0.447476	0.609117	0.476813	0.521131	0.462663	0.467182	0.344412	0.568436	0.481544	0.482387	0.432197	0.435942	0.522079
46	0.459	0.43	0.441867	0.608966	0.502	0.499	0.487	0.581555	0.472195	0.393687	0.561237	0.342317	0.434	0.59	0.52	0.394047	0.692986	0.607565	0.50408	0.607928	0.473722	0.44491	0.618271	0.47202	0.515289	0.458308	0.482302	0.345108	0.569754	0.488954	0.481626	0.430082	0.443655	0.524137
48	0.458	0.433	0.442336	0.611121	0.501	0.498	0.501	0.581243	0.464664	0.395491	0.554336	0.333597	0.44	0.592	0.527	0.400514	0.658713	0.605063	0.4986	0.598129	0.476795	0.424979	0.602742	0.468443	0.507136	0.45668	0.452577	0.341728	0.564267	0.485692	0.488987	0.449502	0.43105	0.524137
50	0.455	0.426	0.435709	0.595702	0.503	0.493	0.502	0.602646	0.471616	0.396153	0.548682	0.350855	0.448	0.601	0.53	0.402178	0.678959	0.600175	0.491801	0.572966	0.481742	0.406672	0.618317	0.465586	0.500909	0.45675	0.455326	0.339441	0.560551	0.484154	0.484474	0.444407	0.436514	0.534999
52	0.437	0.435	0.440973	0.602774	0.5	0.503	0.504	0.589105	0.462392	0.398182	0.567141	0.361034	0.447	0.582	0.534	0.412806	0.693999	0.60096	0.487041	0.586179	0.479898	0.422327	0.607205	0.463095	0.494849	0.451224	0.399141	0.340866	0.565093	0.482616	0.482303	0.446618	0.426944	0.533366
54	0.417	0.428	0.437293	0.589935	0.494	0.498	0.483	0.57856	0.469922	0.398546	0.555916	0.361855	0.457	0.562	0.54	0.416512	0.639913	0.599302	0.49724	0.587144	0.484998	0.43704	0.598734	0.461312	0.489156	0.450449	0.463574	0.336327	0.558048	0.483082	0.476859	0.450993	0.429158	0.529533
56	0.401	0.428	0.436384	0.58866	0.492	0.498	0.491	0.573755	0.473977	0.401431	0.556498	0.368843	0.442	0.563	0.541	0.423358	0.623861	0.592086	0.485081	0.59954	0.500591	0.422754	0.610711	0.460403	0.485063	0.446008	0.45378	0.339806	0.55882	0.4842	0.483684	0.439744	0.433371	0.51434
58	0.358	0.427	0.436428	0.581649	0.489	0.488	0.5	0.576875	0.477052	0.40007	0.598154	0.349215	0.442	0.549	0.546	0.416399	0.621403	0.586907	0.488881	0.595531	0.47913	0.432763	0.601057	0.458939	0.480353	0.446427	0.457732	0.33066	0.554119	0.482988	0.479764	0.450272	0.427337	0.516541
60	0.331	0.426	0.434625	0.576398	0.486	0.498	0.479	0.571509	0.487657	0.402706	0.592334	0.358482	0.437	0.524	0.539	0.413978	0.669414	0.586471	0.481162	0.592043	0.482064	0.433362	0.602878	0.456	0.475872	0.441653	0.495017	0.334835	0.550536	0.483361	0.47841	0.427679	0.436906	0.49858
62	0.299	0.427	0.430519	0.578401	0.483	0.5	0.484	0.571634	0.483335	0.402876	0.583437	0.366777	0.435	0.556	0.542	0.411407	0.648445	0.581001	0.488881	0.596719	0.470327	0.413345	0.592586	0.454146	0.472986	0.440048	0.448969	0.335333	0.551322	0.473714	0.472742	0.439071	0.428587	0.506673
64	0.284	0.425	0.432337	0.571572	0.484	0.496	0.493	0.558031	0.49296	0.403812	0.579114	0.366352	0.431	0.514	0.543	0.400666	0.666811	0.588013	0.478362	0.583729	0.461478	0.434046	0.611258	0.452753	0.47104	0.432314	0.452062	0.3241	0.548312	0.481171	0.46916	0.452146	0.439334	0.492972
66	0.313	0.426	0.434317	0.561434	0.474	0.493	0.485	0.557844	0.496836	0.404905	0.611956	0.367962	0.416	0.53	0.542	0.405696	0.648301	0.585831	0.479242	0.60429	0.460065	0.467066	0.598279	0.45417	0.467971	0.433313	0.44244	0.326485	0.545702	0.485598	0.452915	0.443494	0.418625	0.492972
68	0.319	0.423	0.433525	0.572422	0.473	0.49	0.485	0.561151	0.502495	0.406077	0.560988	0.371669	0.406	0.518	0.54	0.401044	0.645987	0.581117	0.483161	0.602657	0.468545	0.429598	0.598096	0.446815	0.466325	0.430663	0.414433	0.322509	0.545155	0.483967	0.460445	0.435178	0.432086	0.502627
70	0.339	0.423	0.428173	0.56802	0.48	0.488	0.464	0.557594	0.498173	0.408452	0.587262	0.371244	0.427	0.502	0.538	0.402973	0.636009	0.573378	0.469482	0.598501	0.471402	0.412318	0.593315	0.446933	0.465163	0.424656	0.410309	0.32115	0.542385	0.491471	0.450151	0.436331	0.436906	0.487221
72	0.341	0.422	0.428789	0.58007	0.471	0.486	0.468	0.57569	0.501114	0.408567	0.590754	0.375437	0.404	0.522	0.534	0.400061	0.604338	0.566075	0.472762	0.592043	0.478316	0.44012	0.596502	0.444997	0.462625	0.422455	0.435395	0.314788	0.540774	0.49492	0.456074	0.430755	0.438263	0.484879
74	0.348	0.422	0.432103	0.570934	0.47	0.493	0.482	0.554911	0.499109	0.408682	0.57612	0.384248	0.392	0.509	0.531	0.401384	0.624006	0.573349	0.475122	0.600134	0.473108	0.435415	0.609026	0.445504	0.46176	0.420254	0.396048	0.318798	0.538789	0.484154	0.462758	0.434793	0.450975	0.481684
76	0.373	0.425	0.43181	0.566381	0.465	0.486	0.485	0.532884	0.49042	0.410529	0.578698	0.384157	0.394	0.506	0.53	0.399455	0.642516	0.565784	0.480082	0.616018	0.481803	0.42207	0.610894	0.442907	0.461364	0.41724	0.435911	0.316777	0.538803	0.481217	0.454353	0.428977	0.448333	0.496308
78	0.378	0.422	0.427748	0.559977	0.46	0.481	0.474	0.533695	0.501159	0.410401	0.595244	0.398195	0.395	0.527	0.524	0.398132	0.658424	0.562351	0.462683	0.595531	0.468729	0.436356	0.620639	0.441939	0.457963	0.417247	0.453093	0.305676	0.539189	0.495992	0.447246	0.432966	0.455438	0.49645
80	0.393	0.42	0.428672	0.563559	0.463	0.485	0.468	0.554661	0.505347	0.411731	0.583354	0.397618	0.406	0.491	0.525	0.39261	0.628923	0.565028	0.461923	0.581874	0.478316	0.439692	0.606385	0.440534	0.456619	0.414062	0.424227	0.313596	0.538137	0.480611	0.455933	0.431476	0.467257	0.468124
82	0.39	0.423	0.426722	0.558277	0.457	0.486	0.455	0.543741	0.504456	0.412624	0.584352	0.398803	0.384	0.492	0.526	0.387618	0.660159	0.552866	0.459403	0.578459	0.493909	0.416595	0.577785	0.438397	0.454293	0.408459	0.398454	0.306372	0.536232	0.493661	0.443918	0.438783	0.467043	0.466847
84	0.411	0.421	0.425505	0.546834	0.456	0.484	0.451	0.544802	0.499554	0.414312	0.587595	0.399411	0.388	0.486	0.522	0.386218	0.634707	0.556968	0.447404	0.603474	0.512943	0.41343	0.592586	0.435481	0.4524	0.399228	0.428007	0.303489	0.536752	0.484853	0.450264	0.428496	0.469935	0.453784
86	0.416	0.421	0.427279	0.557488	0.456	0.487	0.479	0.548109	0.506684	0.414677	0.581359	0.411078	0.386	0.503	0.521	0.382777	0.62256	0.553884	0.459603	0.598798	0.511745	0.471771	0.611804	0.435363	0.44944	0.398205	0.399313	0.296001	0.531118	0.490865	0.447133	0.425371	0.462508	0.436391
88	0.422	0.421	0.430197	0.553026	0.449	0.474	0.446	0.545052	0.509892	0.416802	0.587511	0.404971		0.5	0.515	0.384895	0.633406	0.549724	0.457683	0.618616	0.512236	0.462019	0.604973	0.429968	0.448224	0.398693	0.348282	0.300673	0.530758	0.492589	0.445018	0.432245	0.461901	0.458753
90	0.439	0.417	0.43071	0.551144	0.451	0.483	0.455	0.537252	0.509402	0.416086	0.577617	0.40333		0.464		0.382172	0.643673	0.541868	0.447364	0.606666	0.5105	0.442943	0.59673	0.42756	0.445341	0.39898	0.416323	0.307366	0.527922	0.489513	0.438052	0.451329	0.46565	0.43561
92		0.419	0.428584	0.53873	0.447	0.477	0.438	0.532322	0.507664	0.418047	0.587345	0.406855		0.482		0.386483	0.632827	0.539133	0.459683	0.624406	0.514187	0.436955	0.590946	0.434112	0.443828	0.395988		0.309619	0.526563	0.475485		0.440994	0.471113	0.446756
94		0.413		0.575669	0.441	0.474	0.443	0.542431	0.525532		0.572628	0.396737		0.477		0.380886	0.628778	0.543643	0.470722	0.624332	0.512451	0.456373	0.596548	0.43188	0.44267			0.295172	0.527828	0.47623		0.42739		0.458753
96		0.414		0.566139	0.443	0.483	0.45	0.529265	0.50811		0.56897	0.401537		0.478		0.388563	0.646276	0.534332	0.461963	0.61639	0.513926	0.460992	0.588168	0.426544	0.44036			0.302097	0.521795	0.482056		0.437341		0.438166
98		0.411		0.554331	0.441	0.481	0.429	0.522775	0.506996		0.600482			0.492		0.38724	0.657845	0.543032	0.453204	0.589667		0.434303	0.604108	0.426367	0.438475			0.295769	0.522075	0.495199		0.441763		0.442638
100		0.411			0.434	0.483	0.436	0.519531	0.524775		0.597738			0.484		0.382209	0.679682	0.534187	0.457443	0.62255		0.431908	0.591812	0.421173	0.437235			0.290334	0.519518	0.49217		0.445368
102		0.411			0.439	0.477	0.43	0.529265	0.525131		0.571381			0.467			0.644685		0.451604	0.609412			0.587758	0.41965	0.435264			0.297856	0.516841	0.489979		0.448157
104		0.411			0.432	0.476	0.435	0.523587	0.530211					0.464			0.609834		0.441645				0.601148	0.421668	0.433672			0.298651	0.512499			0.433351
106		0.409			0.43	0.471	0.433		0.522948								0.631815		0.452084				0.583068	0.416427	0.433077			0.297856	0.510368			0.447435
108		0.405			0.428575	0.481											0.64671						0.599508	0.418186	0.432402			0.290964	0.507212			0.459645
110		0.405			0.427511	0.482											0.662039						0.59928	0.414715	0.431362			0.288644
112		0.407				0.469											0.666088						0.599007		0.429558			0.292919
114		0.409				0.478											0.624729						0.572957		0.428803			0.289208
116						0.463																			0.428234			0.284005
118						0.47																			0.426522			0.28321
120
